# Supplementary material for: How Sure Can We Be about ML Methods-Based Evaluation of Compound Activity: Incorporation of Information about Prediction Uncertainty Using Deep Learning Techniques
Source: MDPI journal article supplement (doi:10.3390/molecules25061452), 2020-03-23

# CHEMBL214 hashed1024-morgan-4

CV

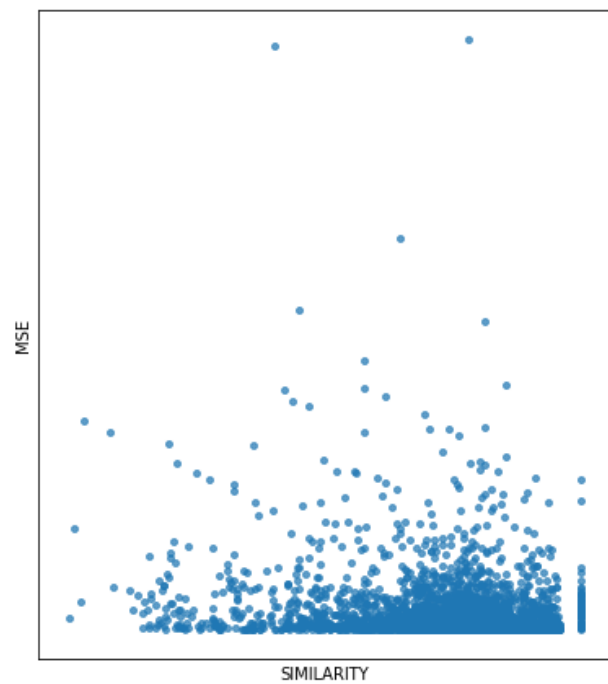

UNCERTAINTY

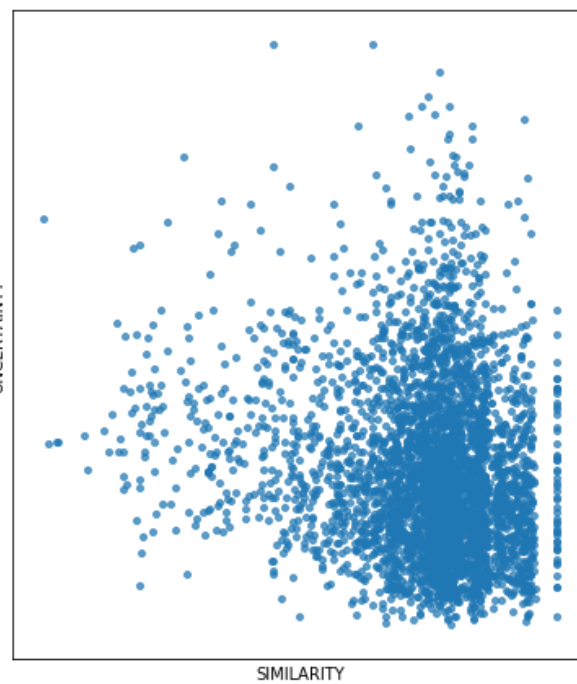

MSE

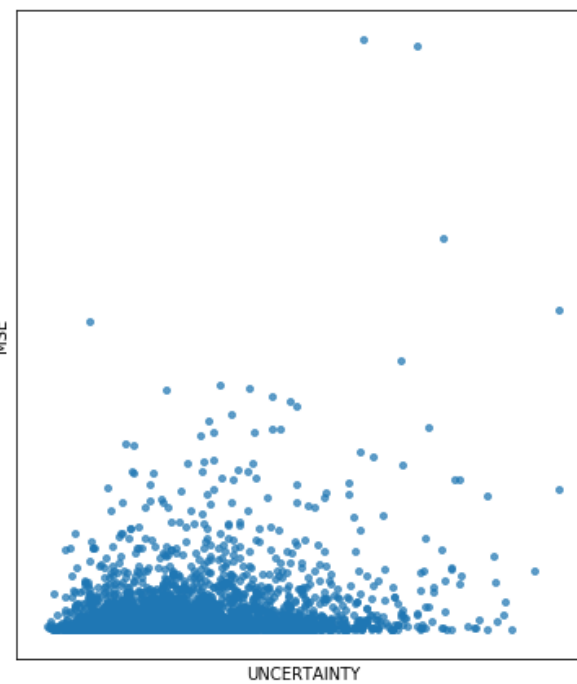

bac

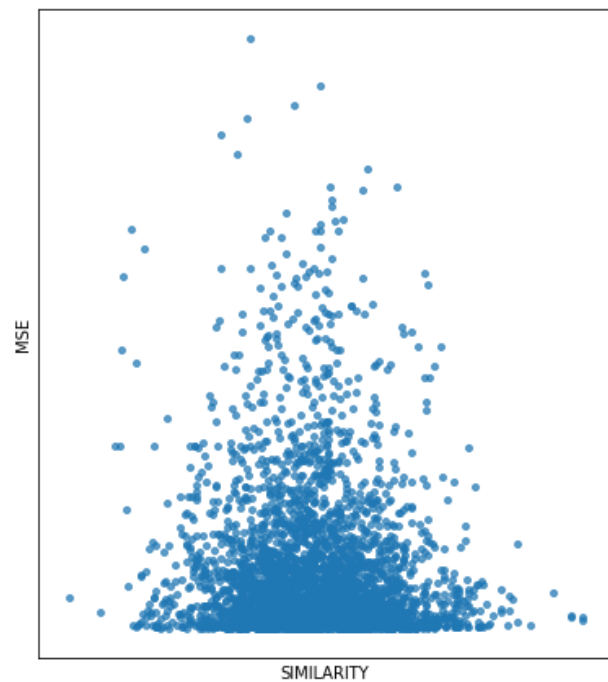

UNCERTAINTY

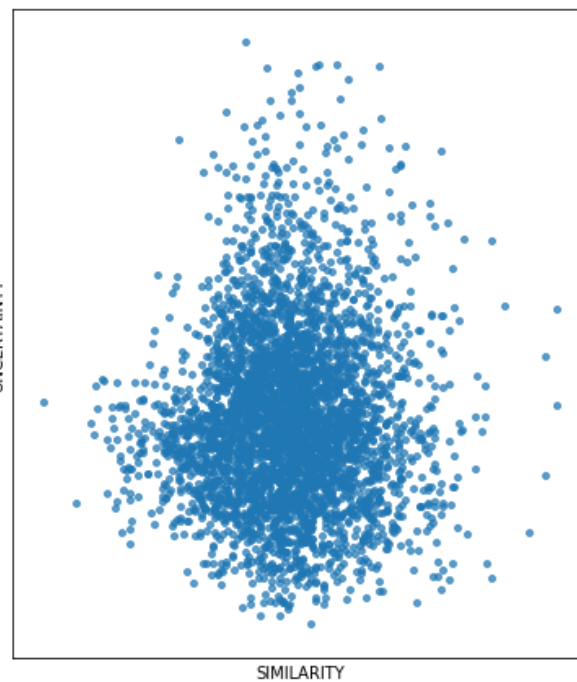

MSE

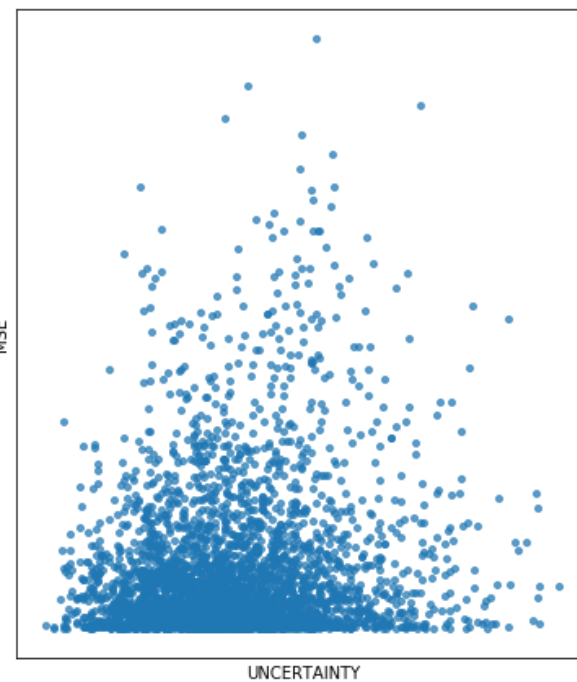

# CHEMBL216 hashed1024-morgan-4

CV

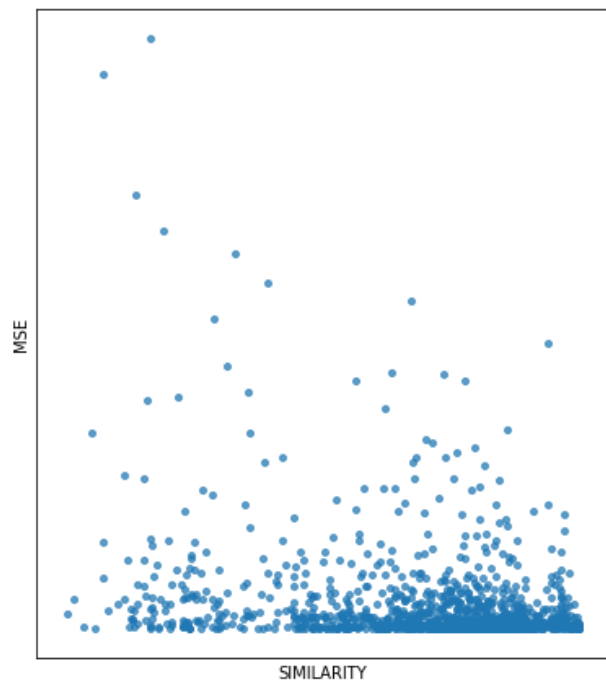

UNCERTAINTY

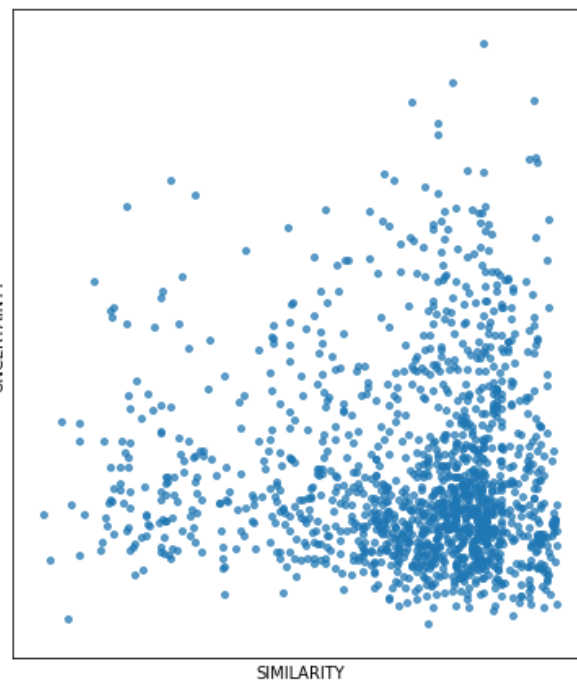

MSE

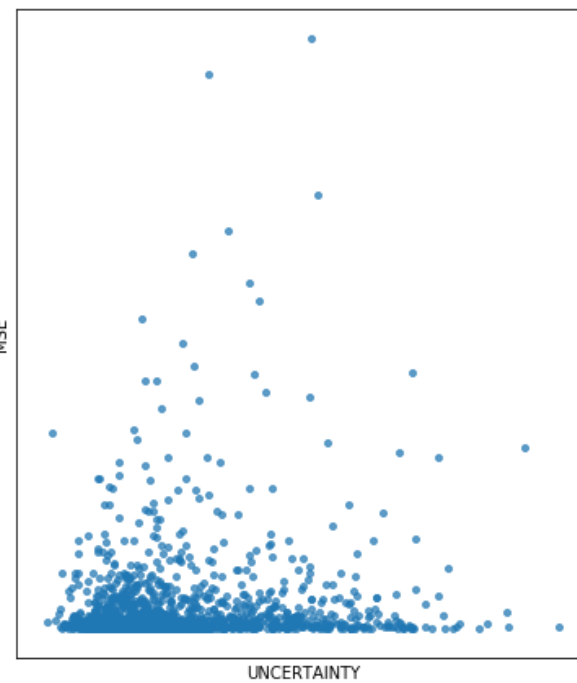

bac

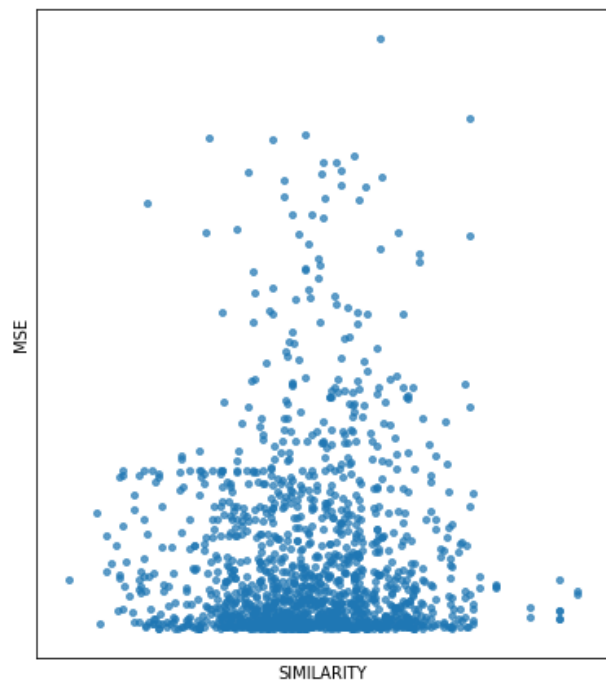

UNCERTAINTY

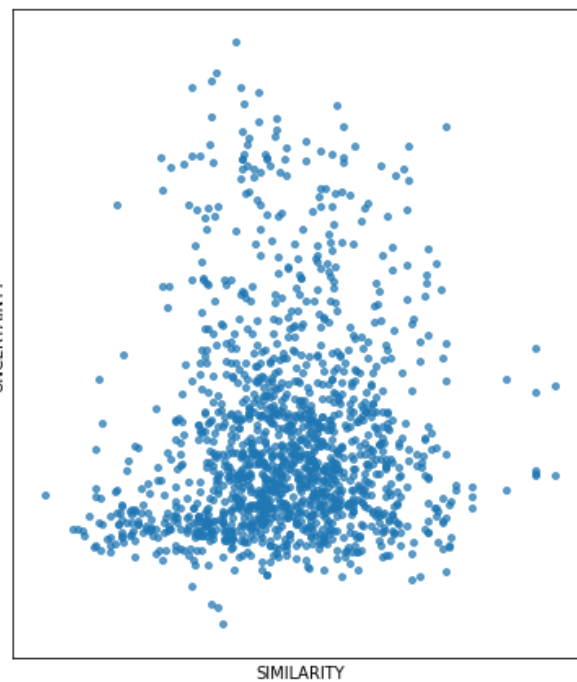

MSE

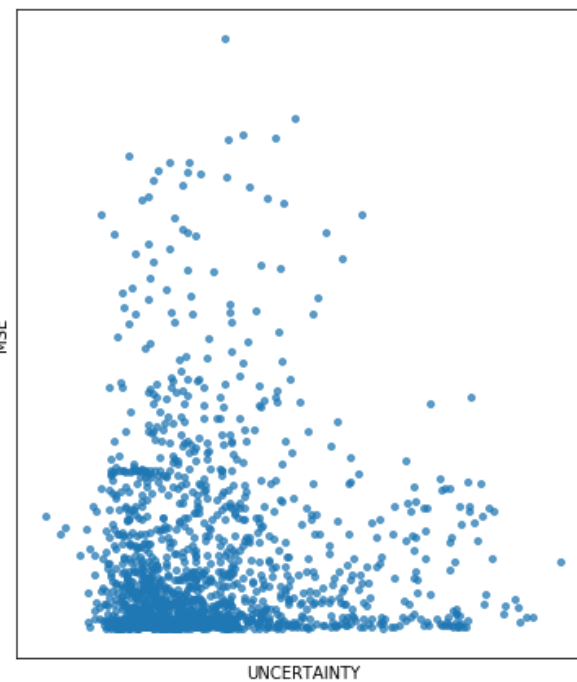

# CHEMBL217 hashed1024-morgan-4

CV

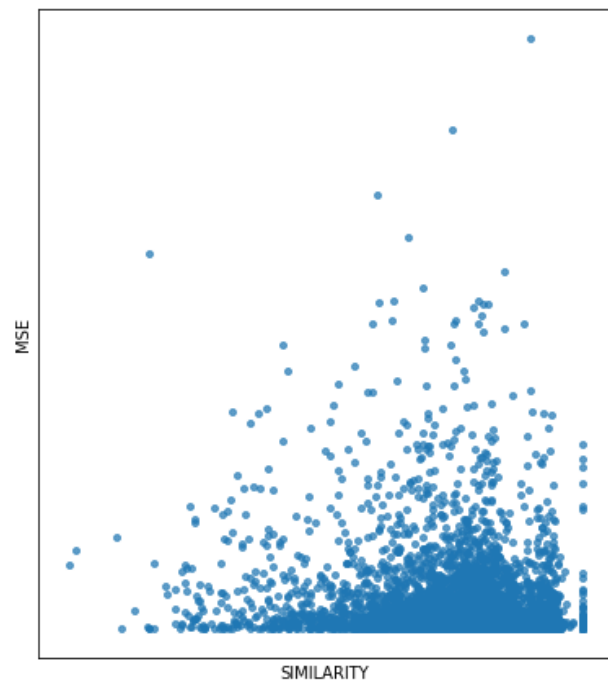

UNCERTAINTY

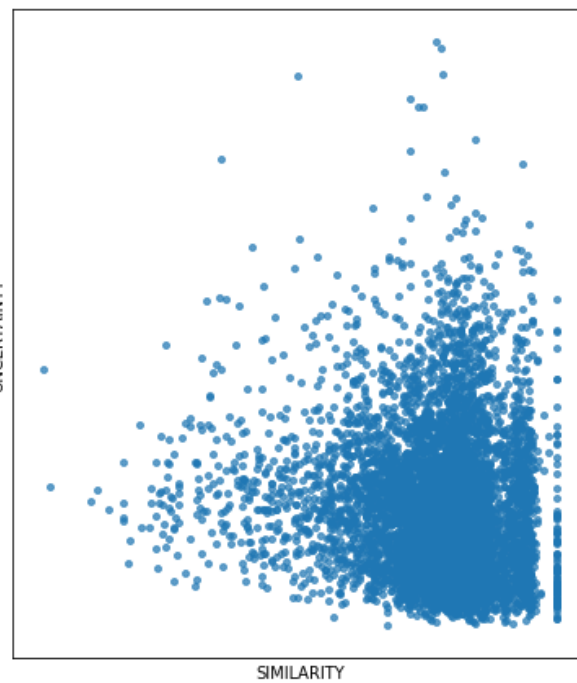

MSE

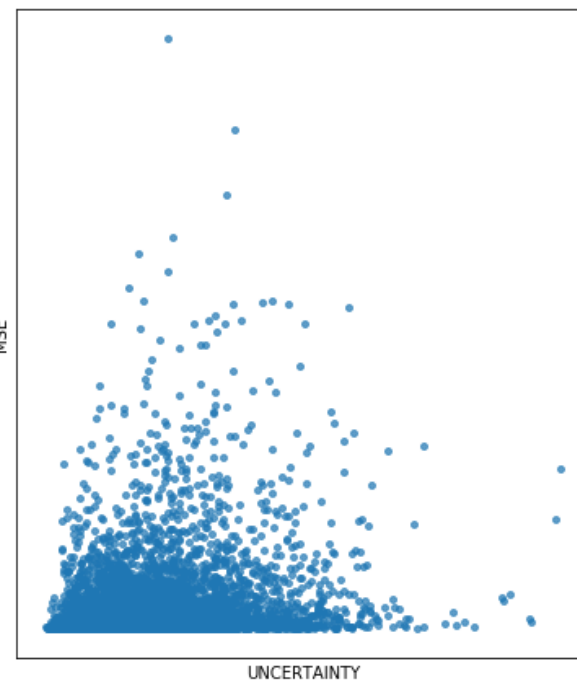

bac

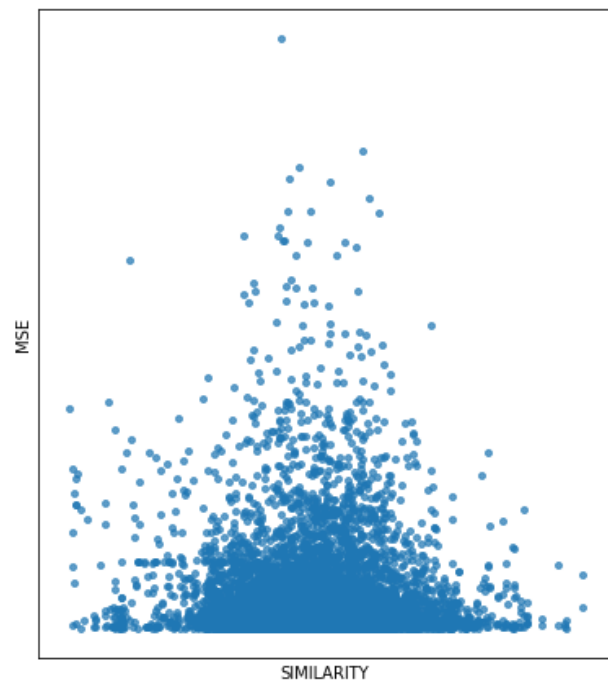

UNCERTAINTY

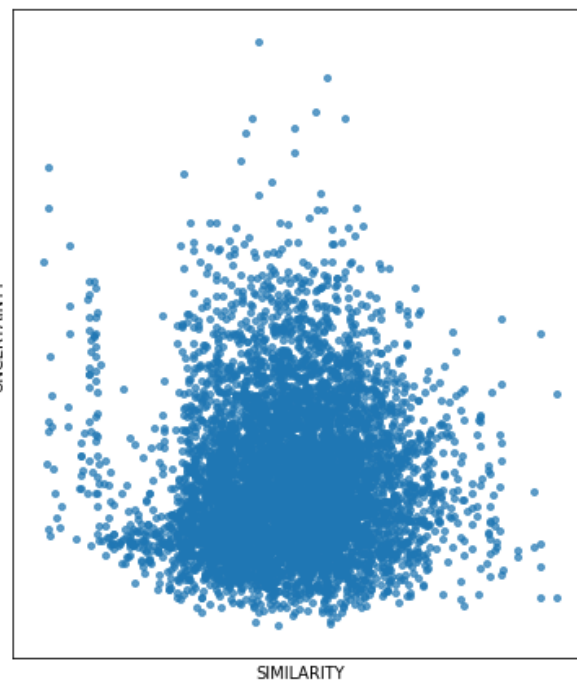

MSE

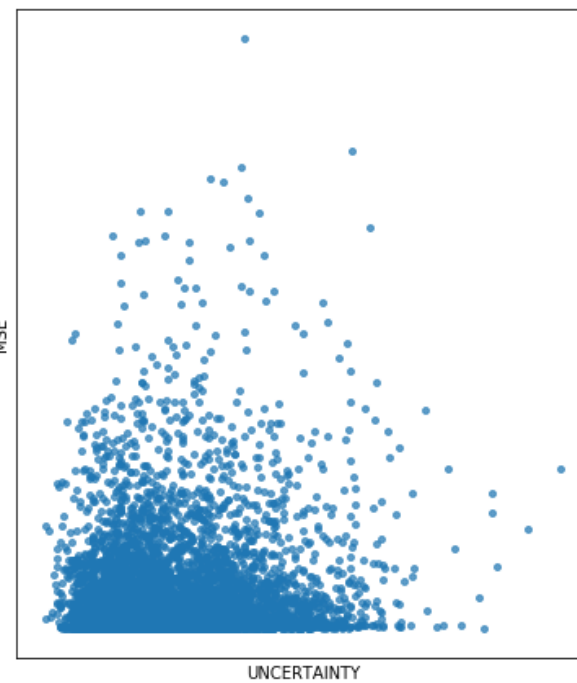

# CHEMBL224 hashed1024-morgan-4

CV

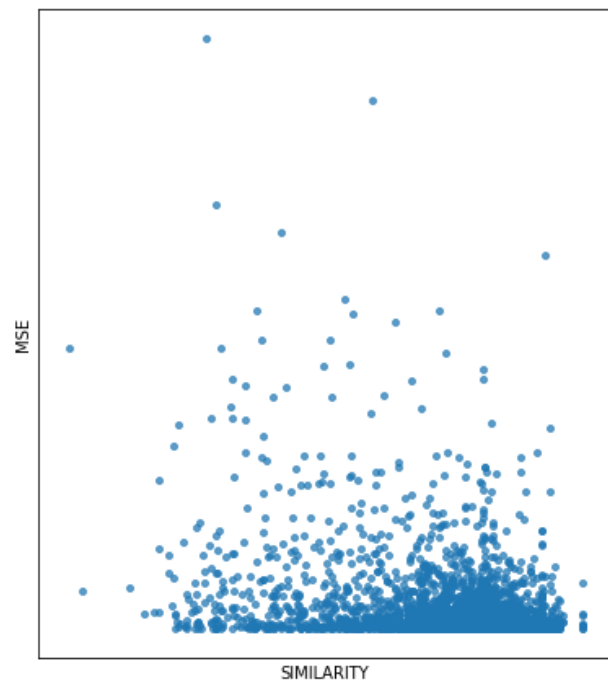

UNCERTAINTY

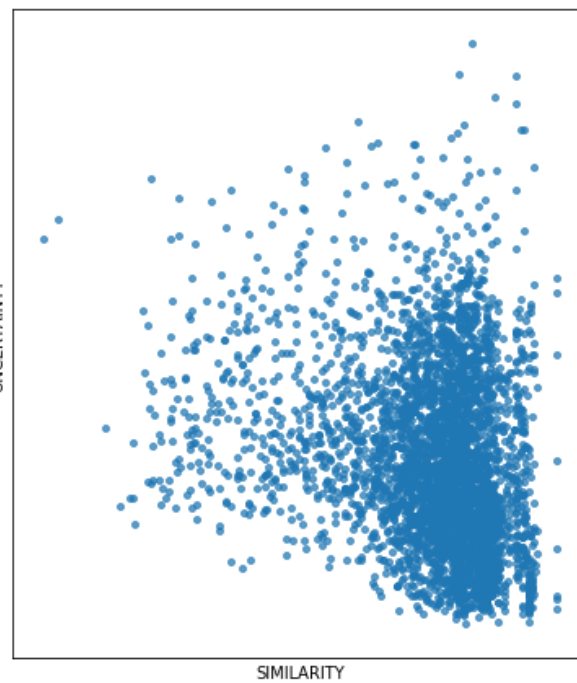

MSE

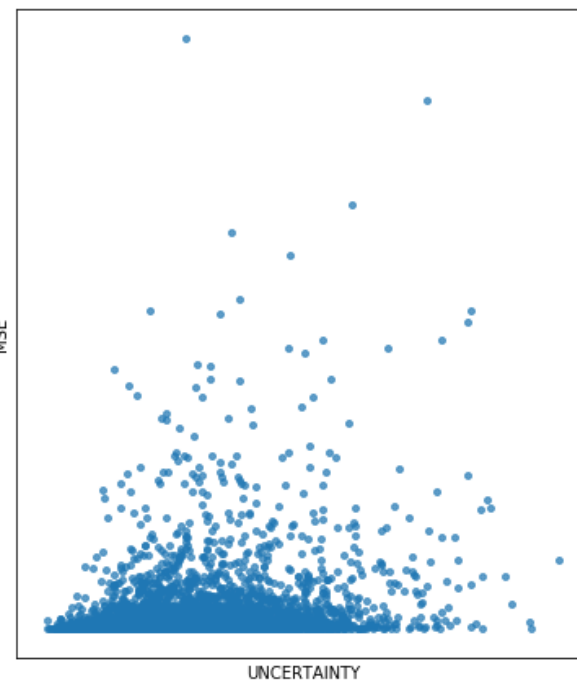

bac

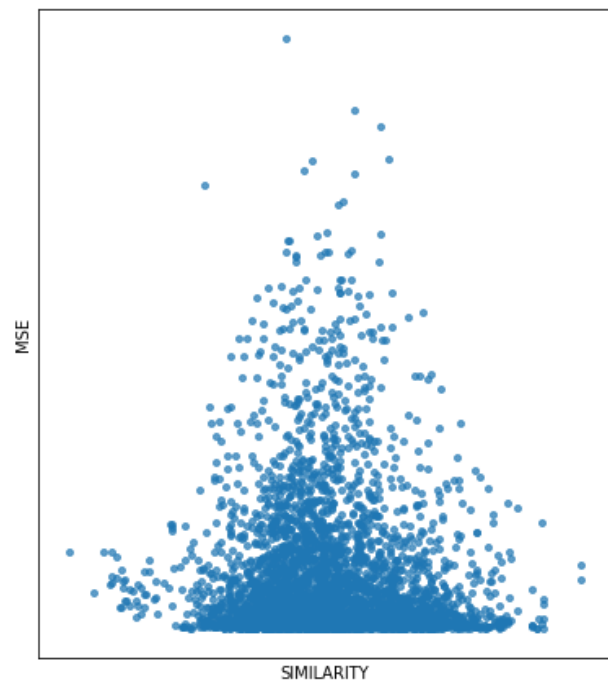

UNCERTAINTY

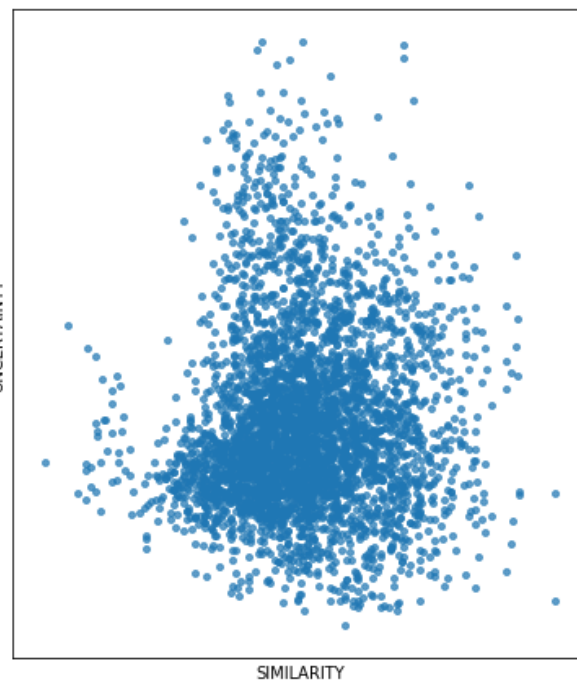

MSE

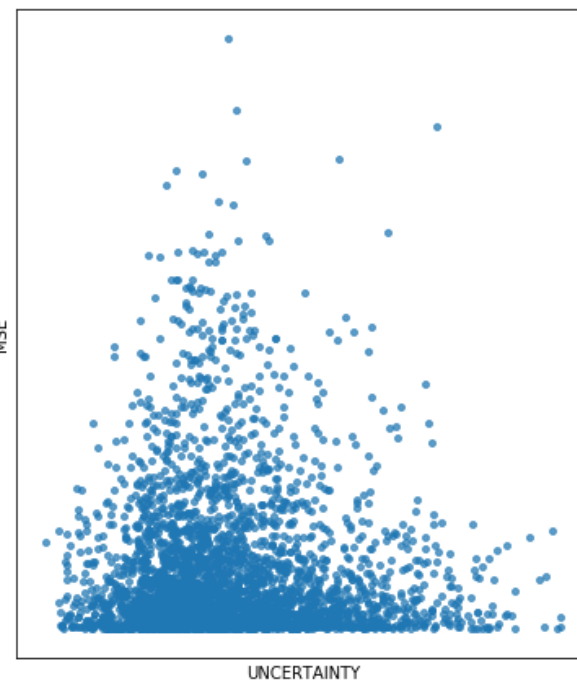

# CHEMBL225 hashed1024-morgan-4

CV

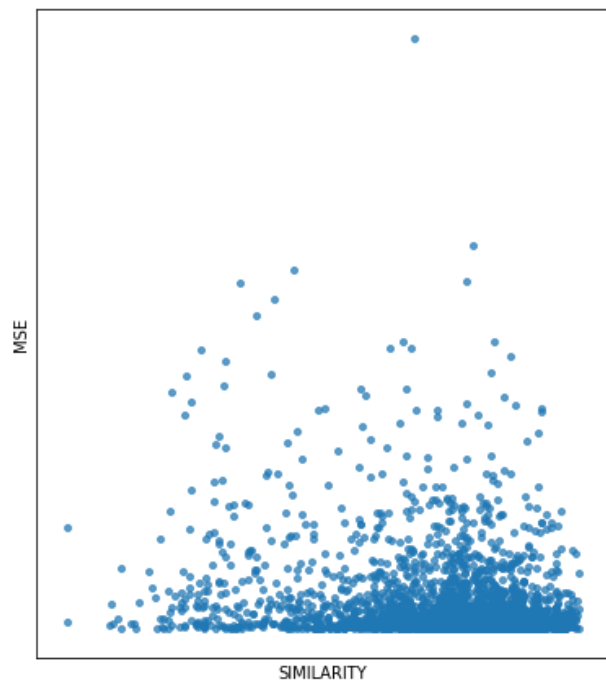

UNCERTAINTY

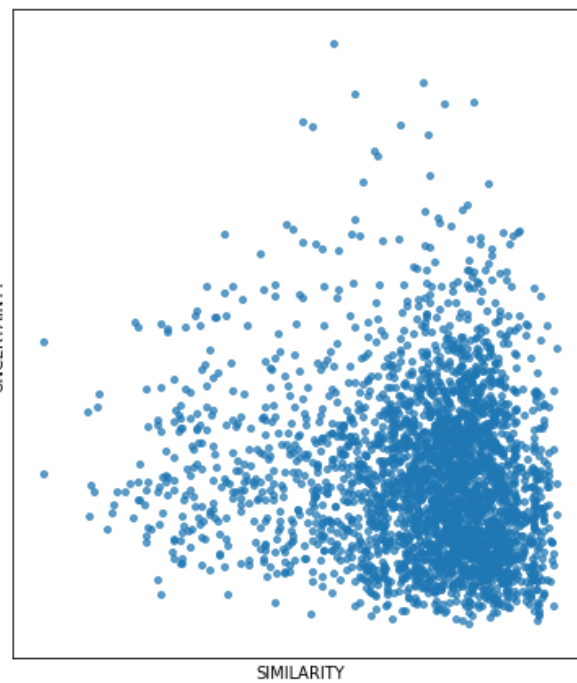

MSE

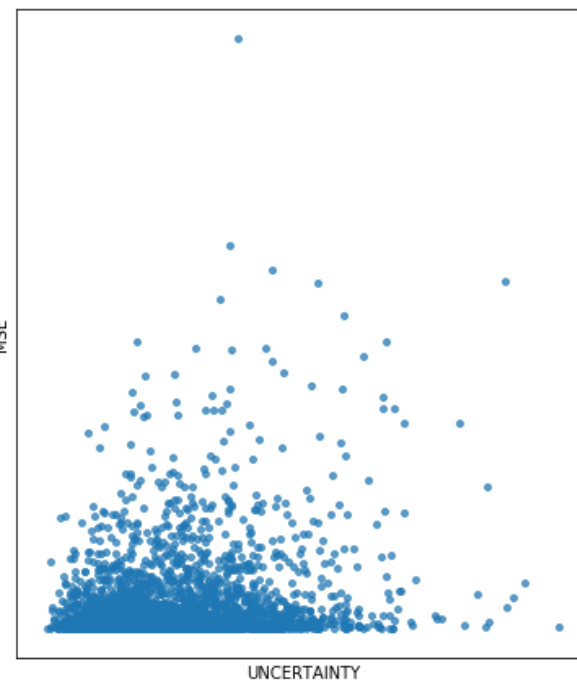

bac

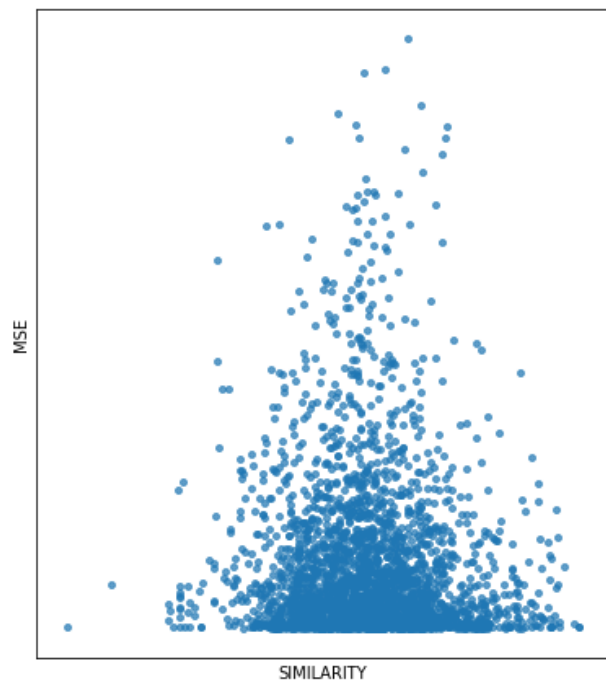

UNCERTAINTY

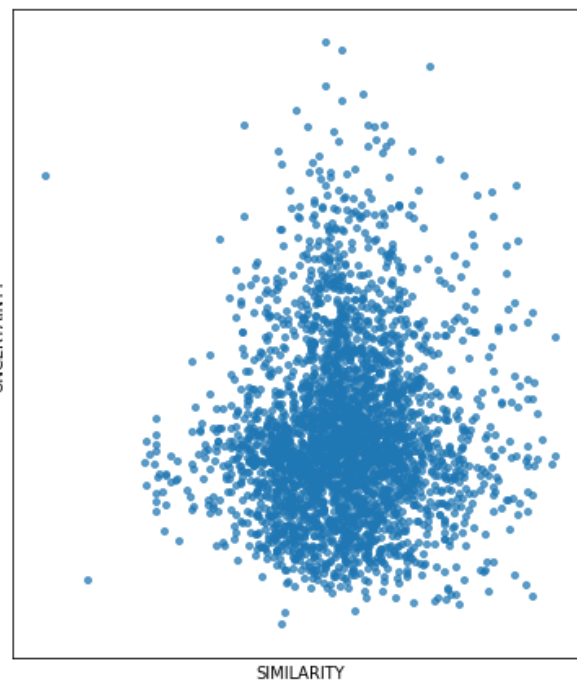

MSE

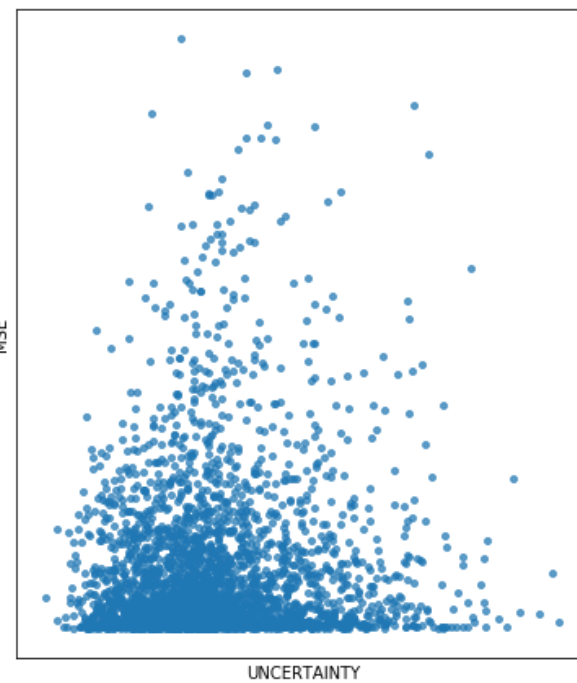



# CHEMBL226 hashed1024-morgan-4

CV

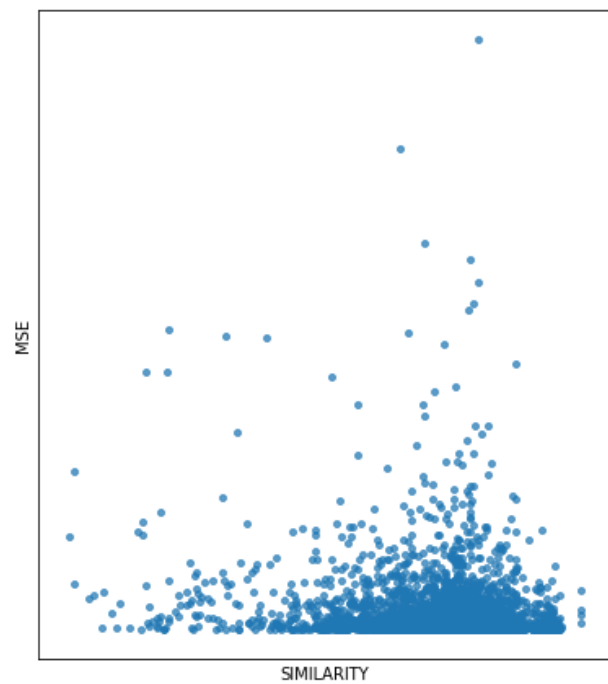

UNCERTAINTY

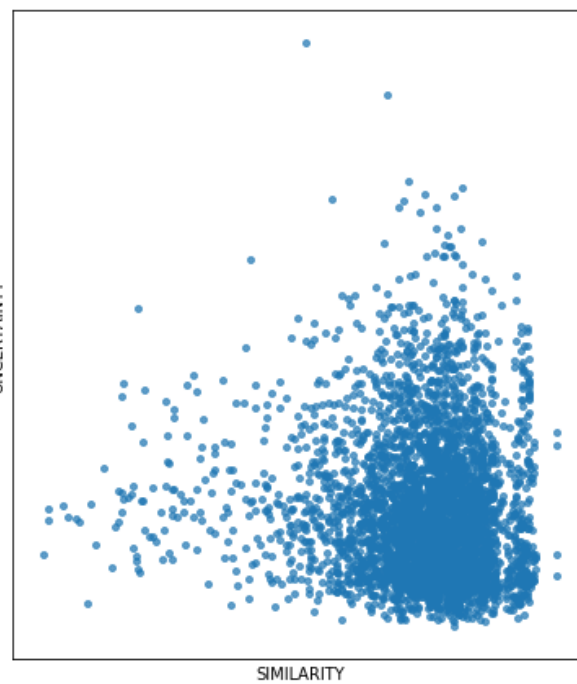

MSE

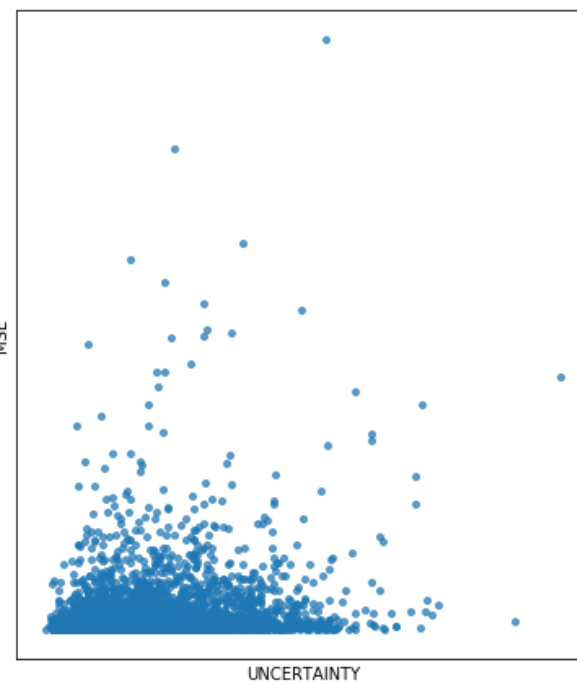

bac

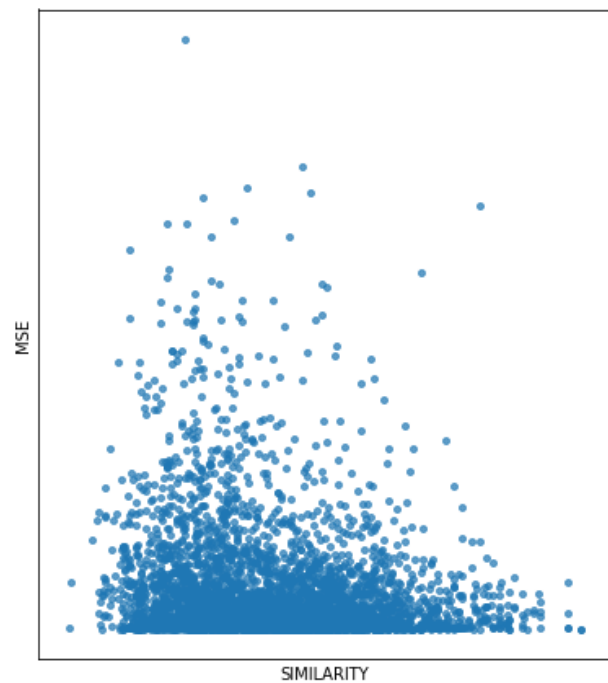

UNCERTAINTY

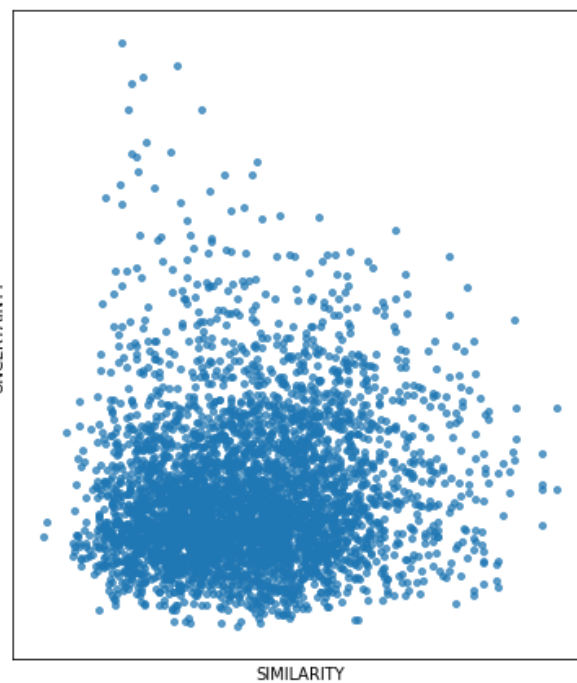

MSE

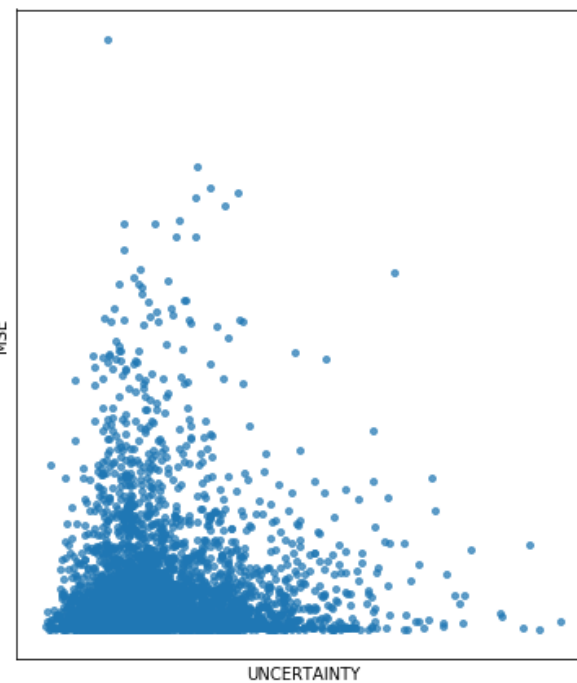

# CHEMBL251 hashed1024-morgan-4

CV

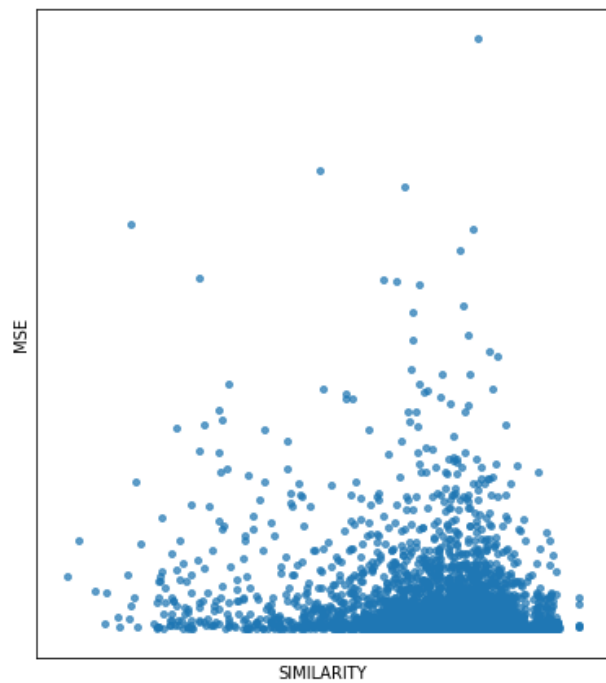

UNCERTAINTY

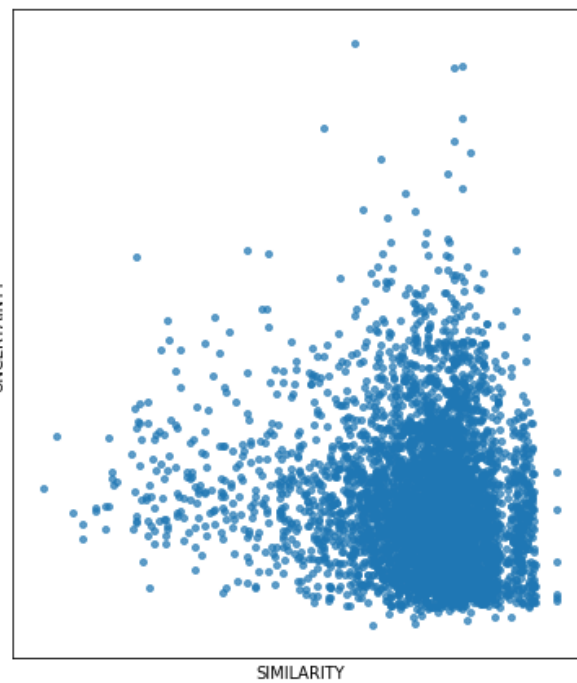

MSE

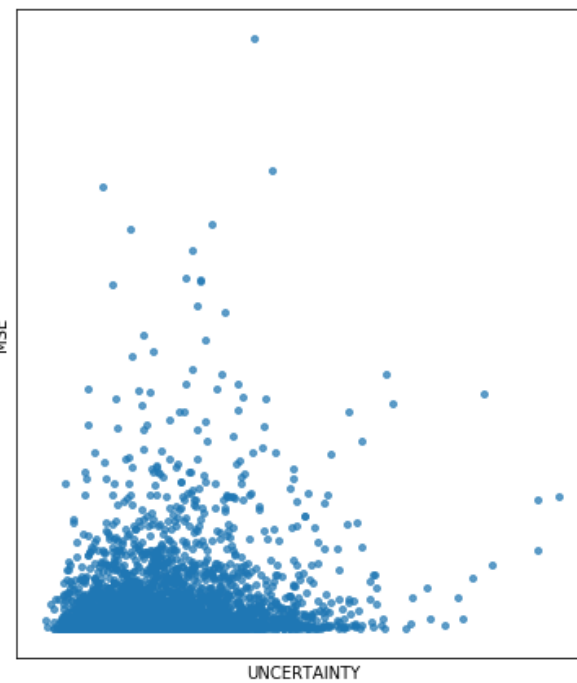

bac

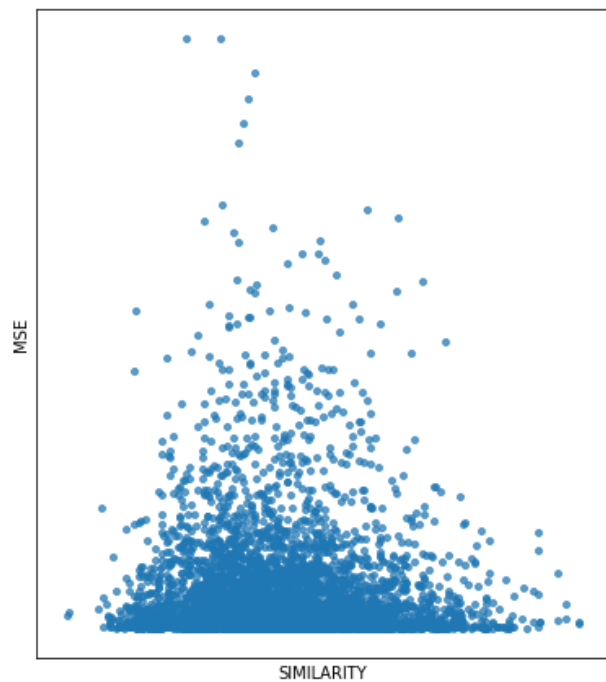

UNCERTAINTY

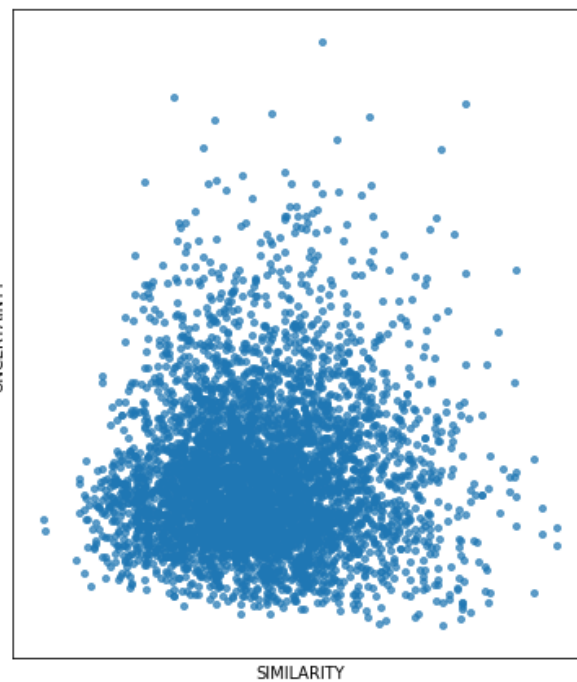

MSE

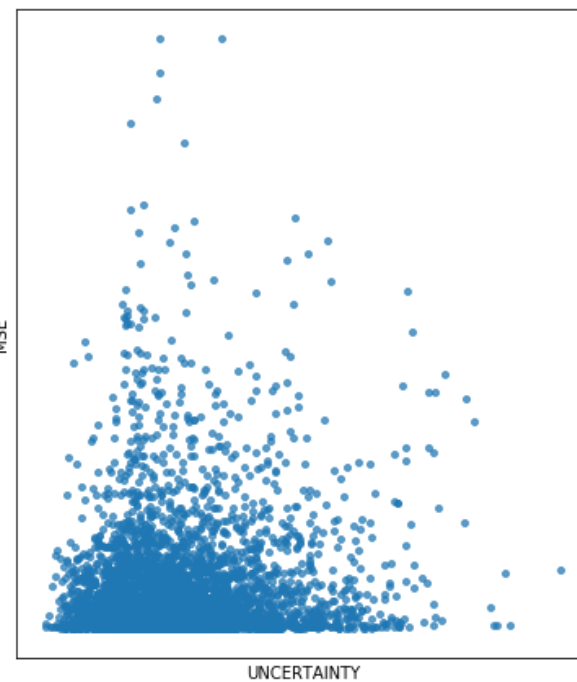

# CHEMBL264 hashed1024-morgan-4

CV

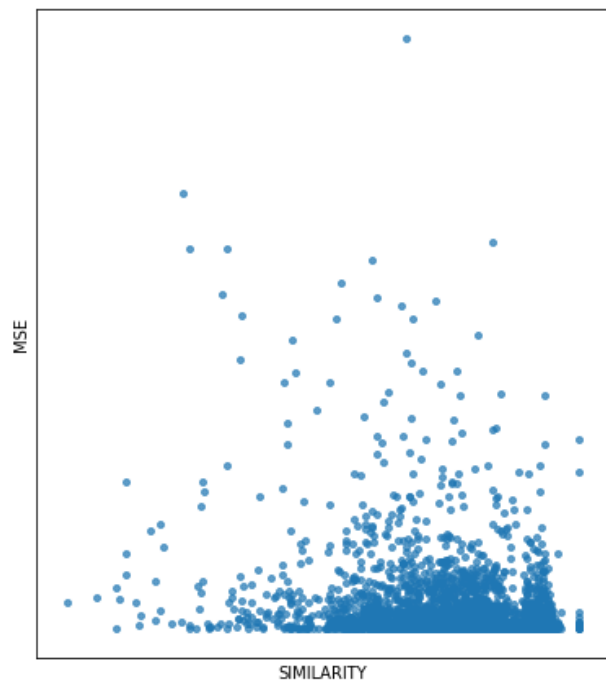

UNCERTAINTY

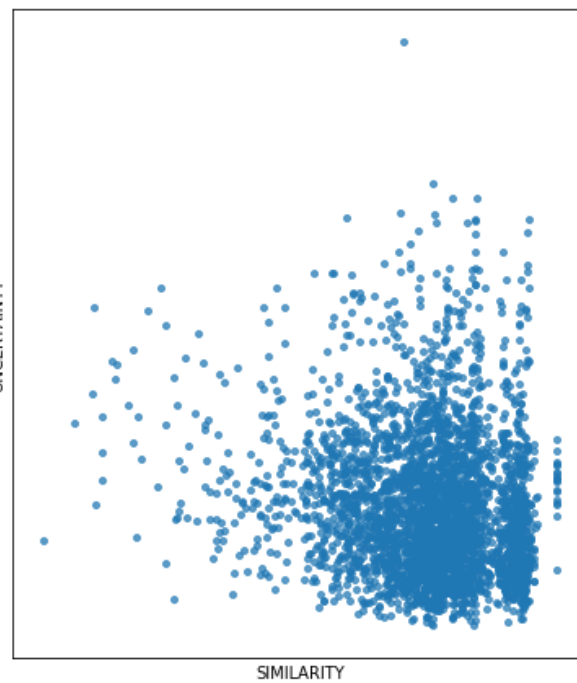

MSE

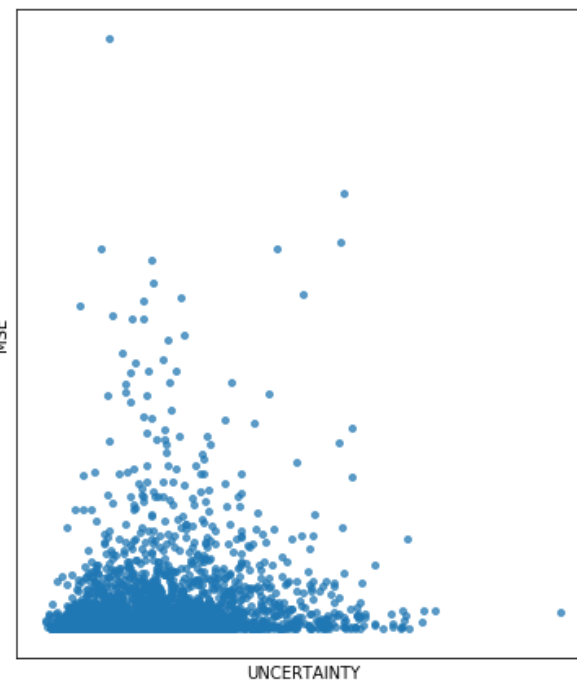

bac

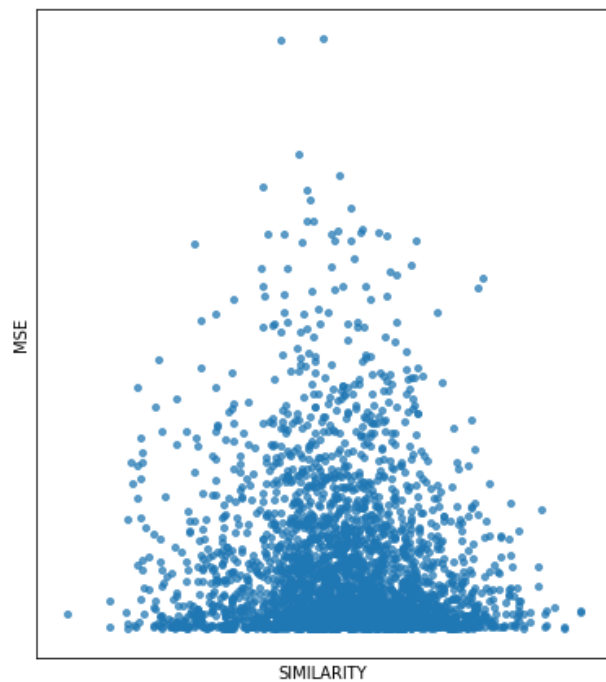

UNCERTAINTY

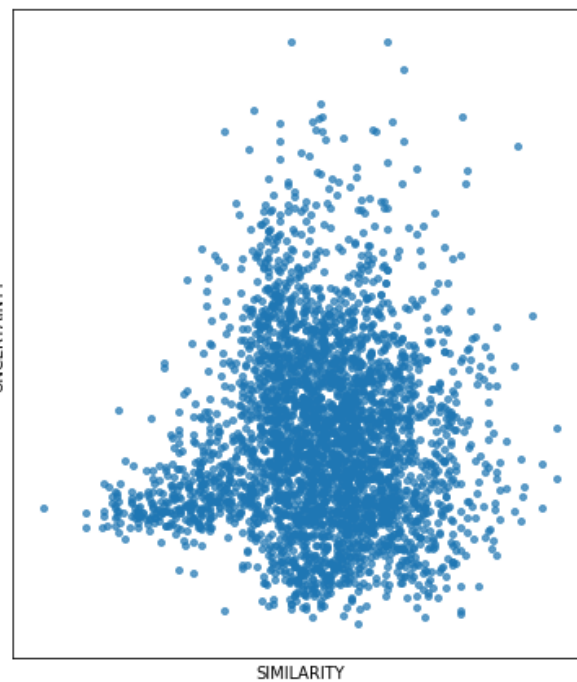

MSE

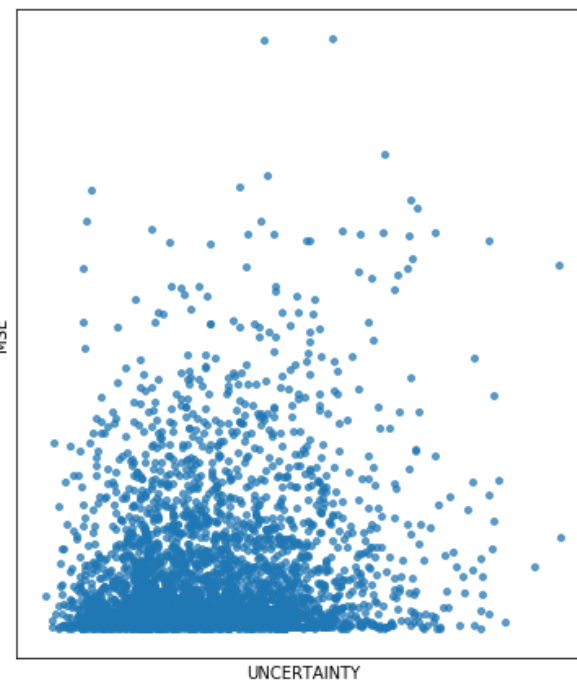



# CHEMBL3155 hashed1024-morgan-4

CV

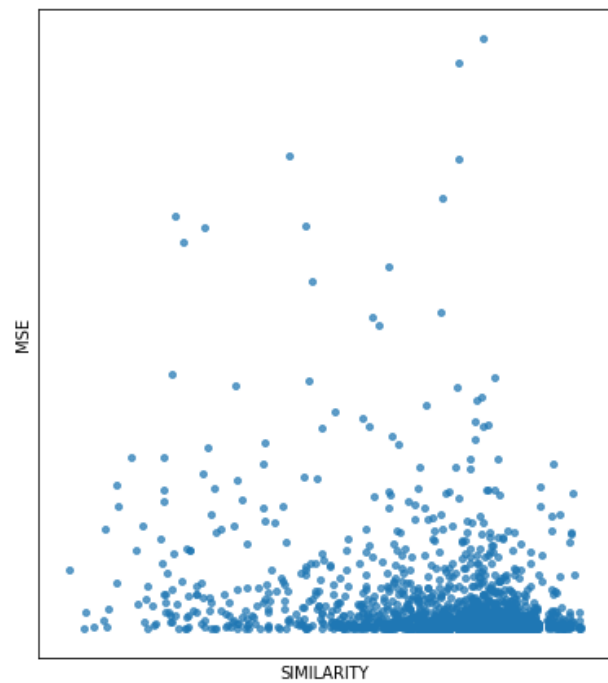

UNCERTAINTY

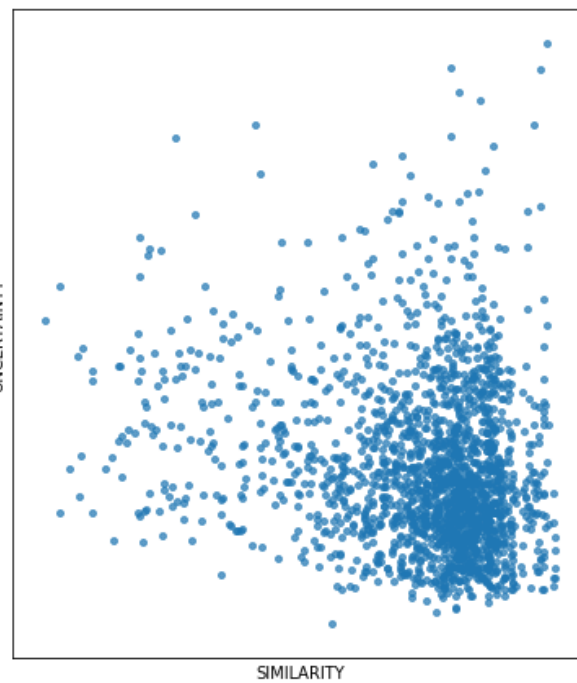

MSE

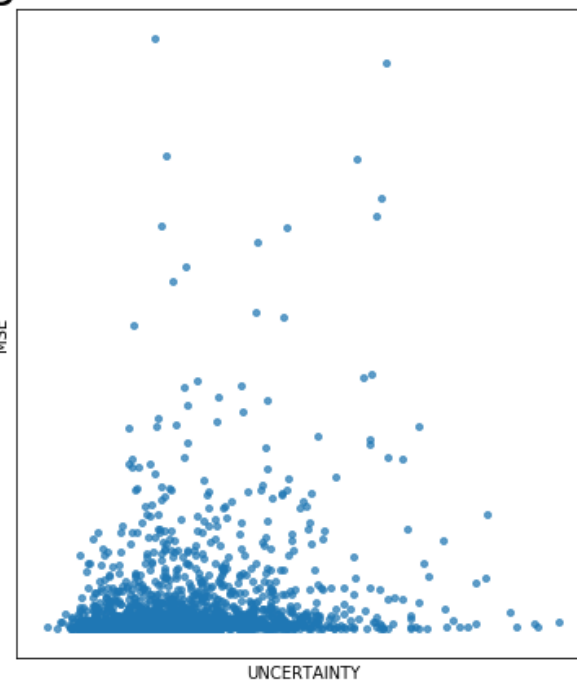

bac

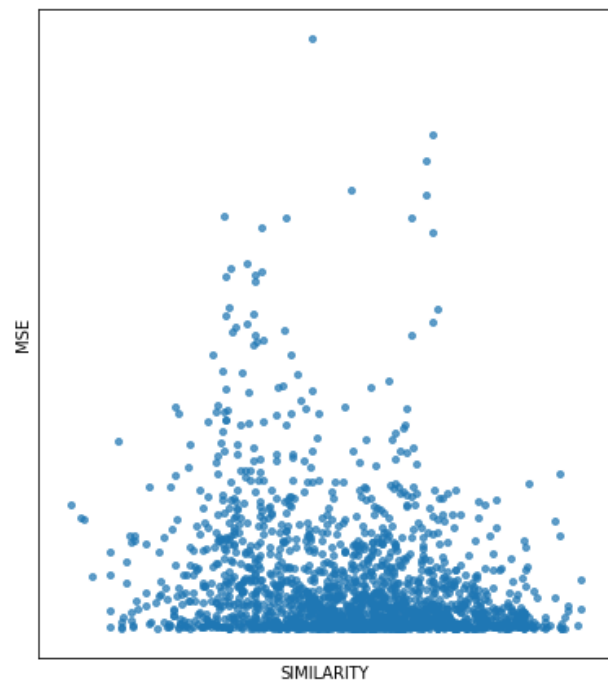

UNCERTAINTY

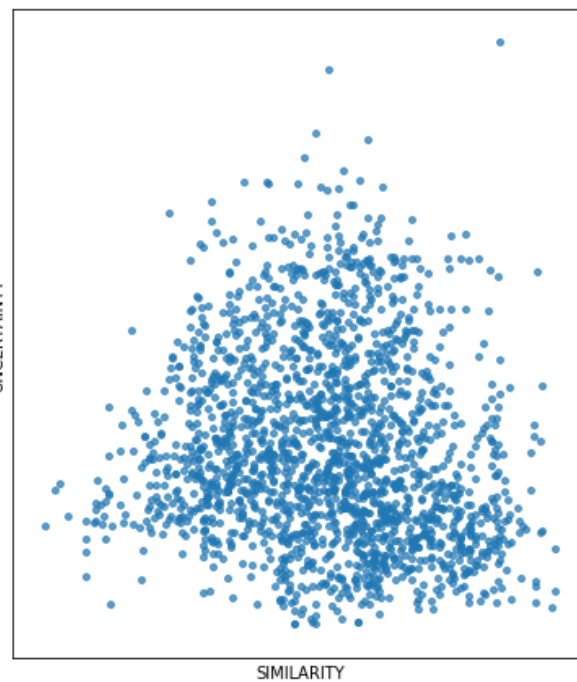

MSE

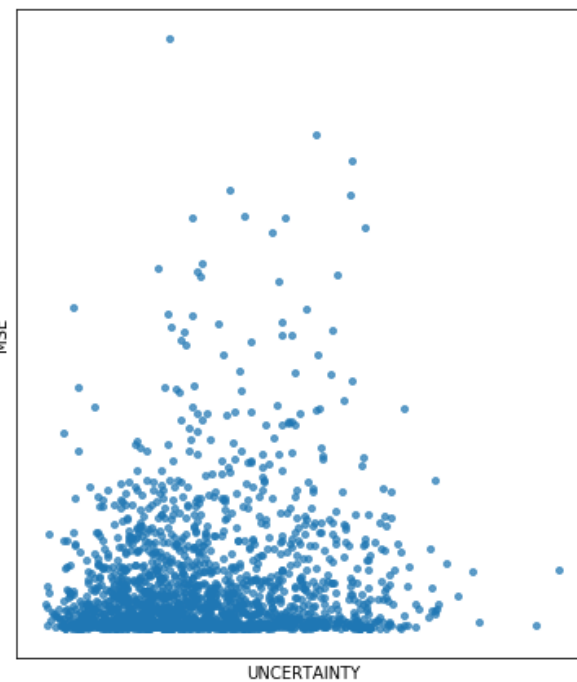

# CHEMBL3371 hashed1024-morgan-4

CV

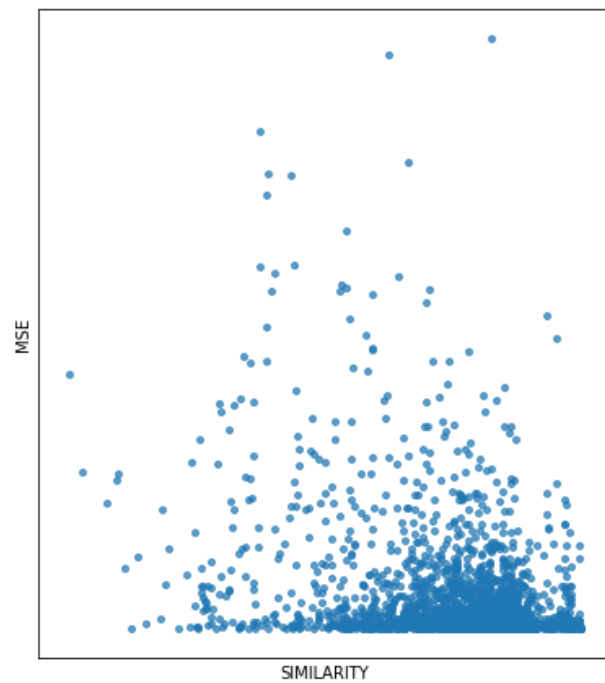

UNCERTAINTY

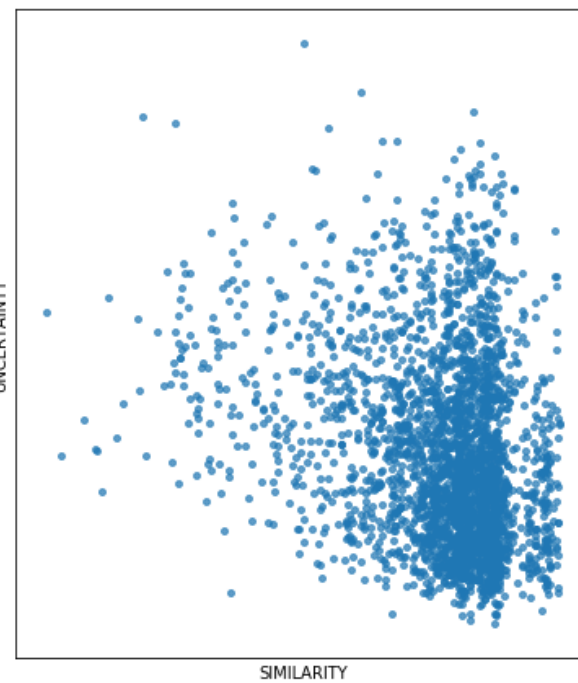

MSE

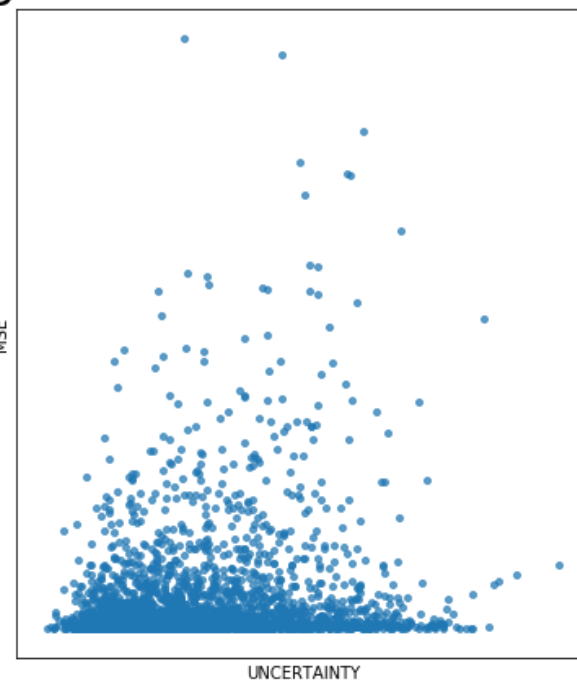

bac

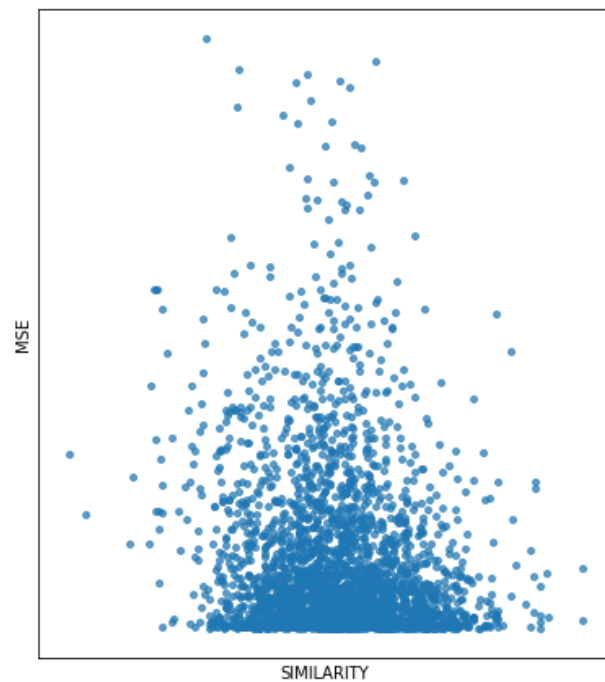

UNCERTAINTY

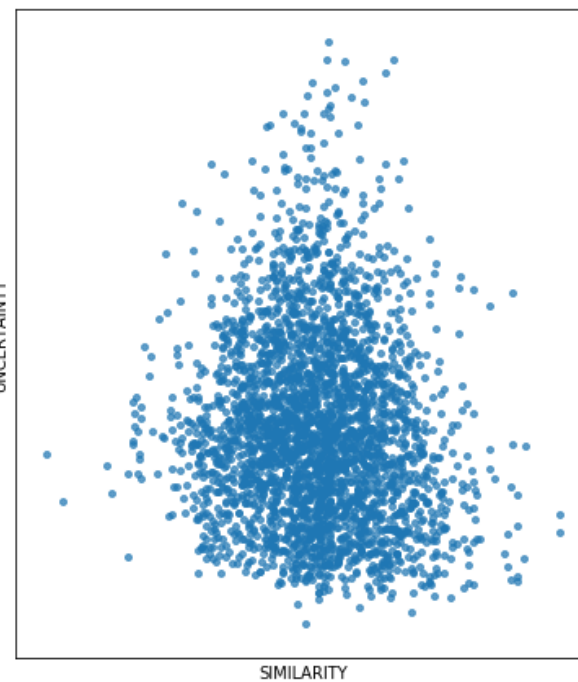

MSE

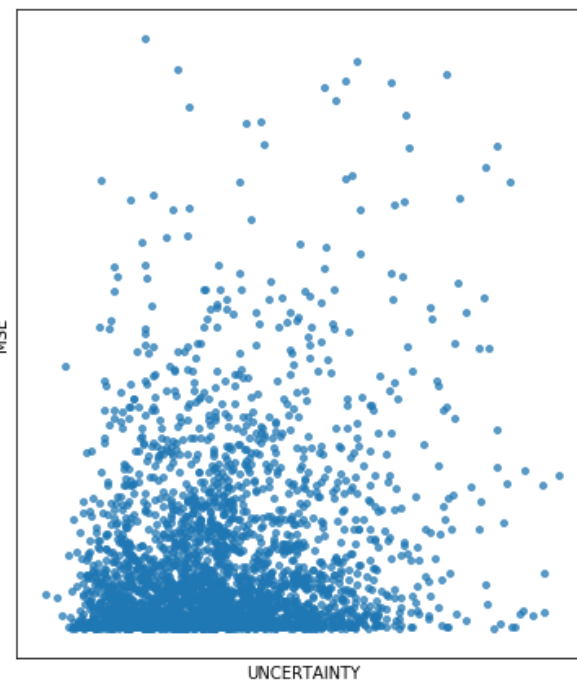

# CHEMBL214 maccs

CV

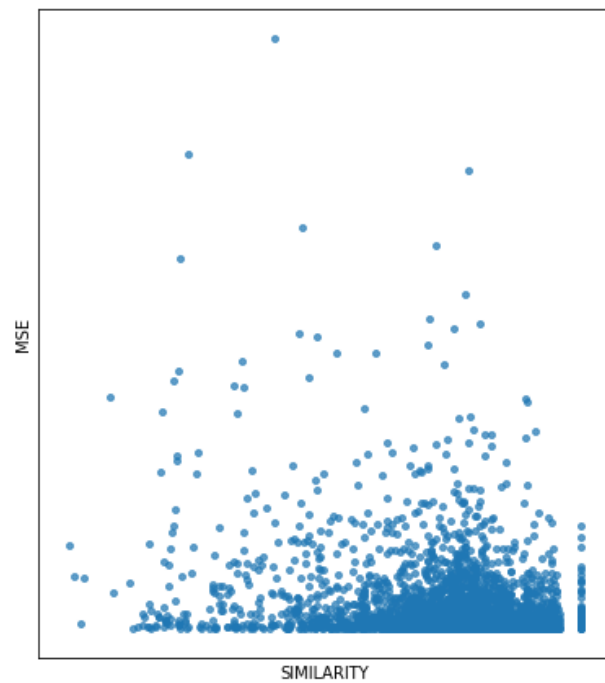

UNCERTAINTY

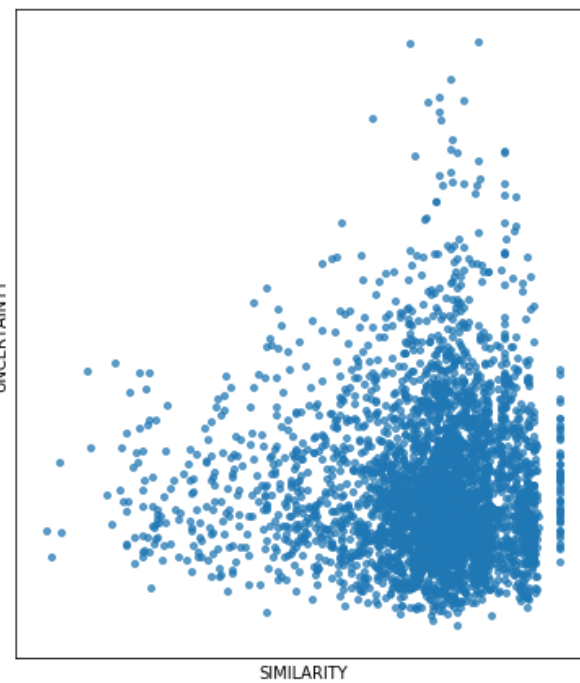

MSE

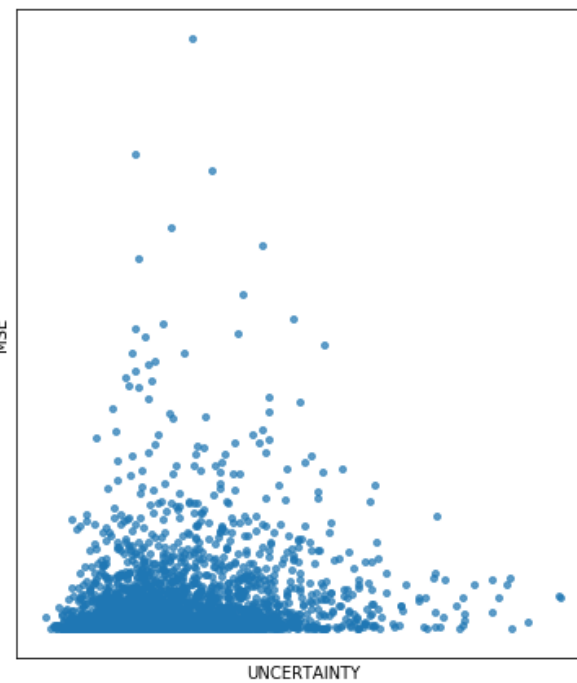

bac

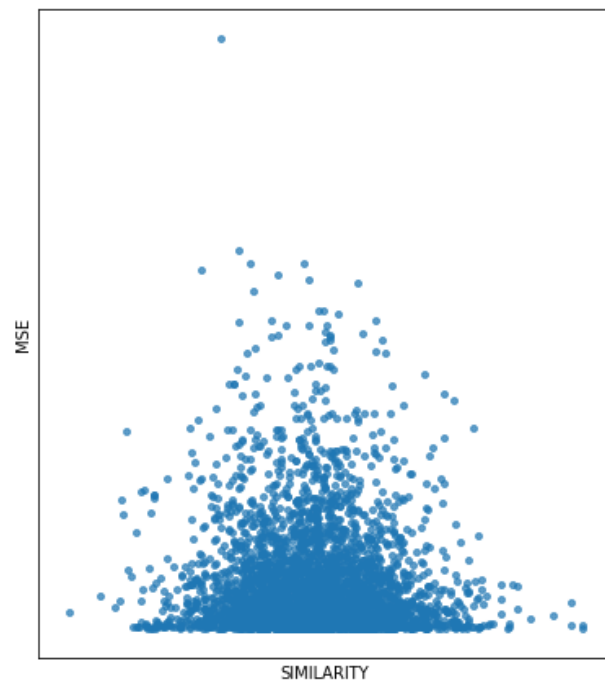

UNCERTAINTY

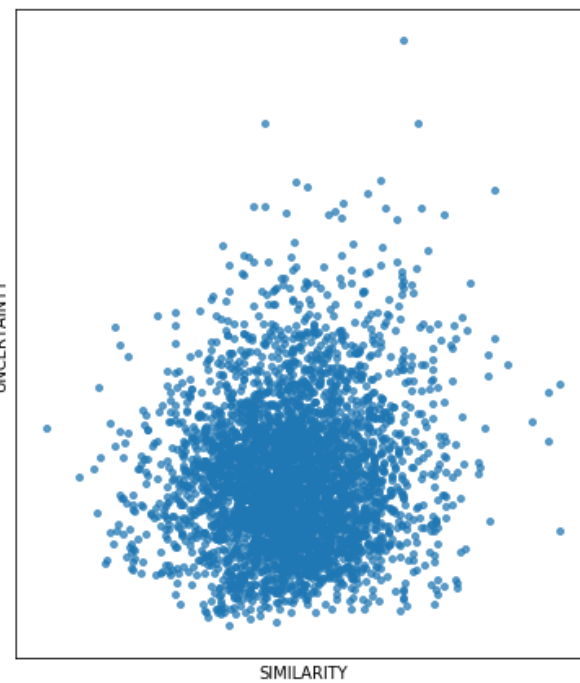

MSE

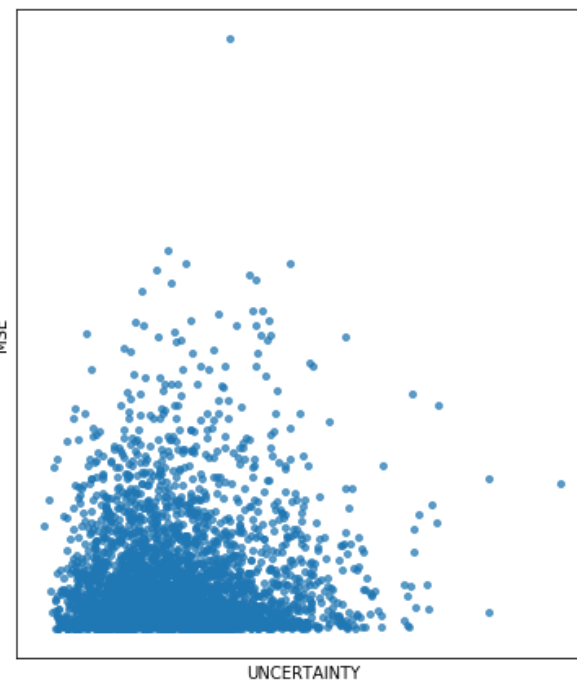

# CHEMBL216 maccs

CV

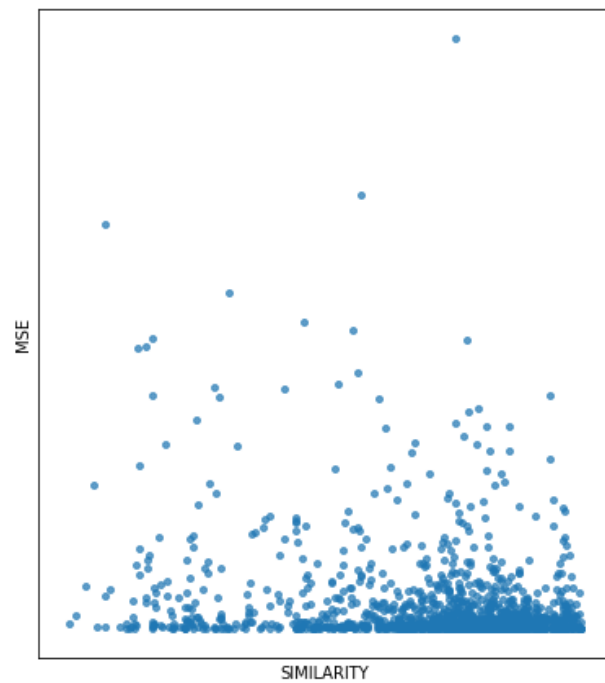

UNCERTAINTY

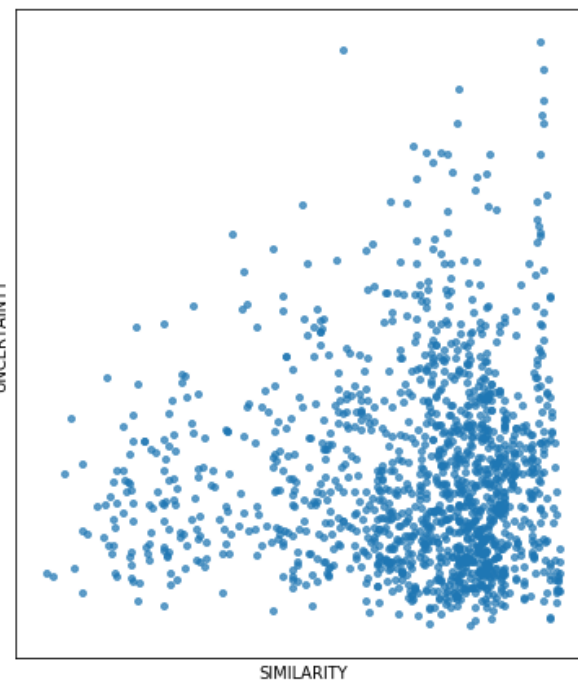

MSE

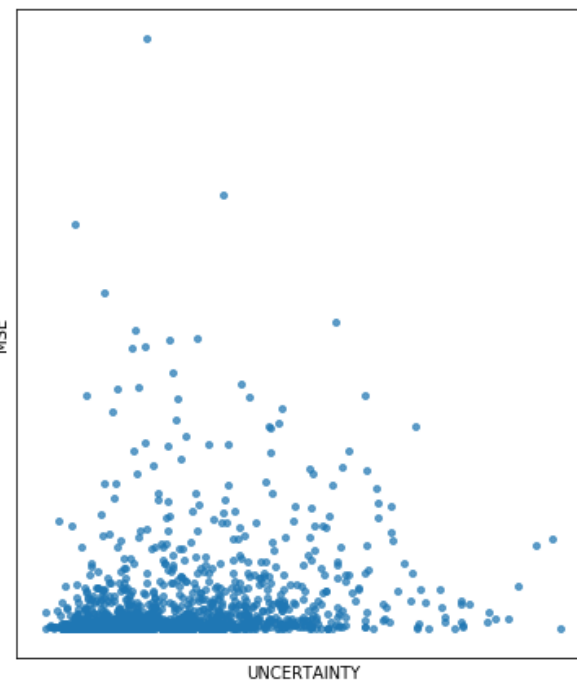

bac

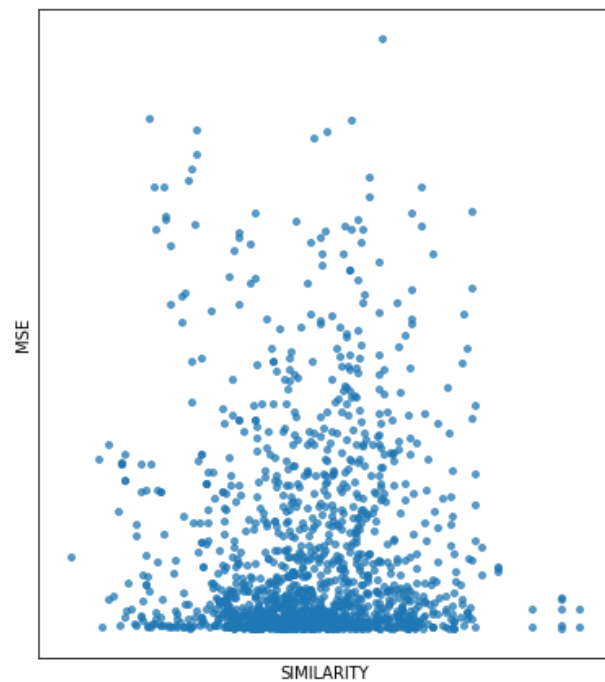

UNCERTAINTY

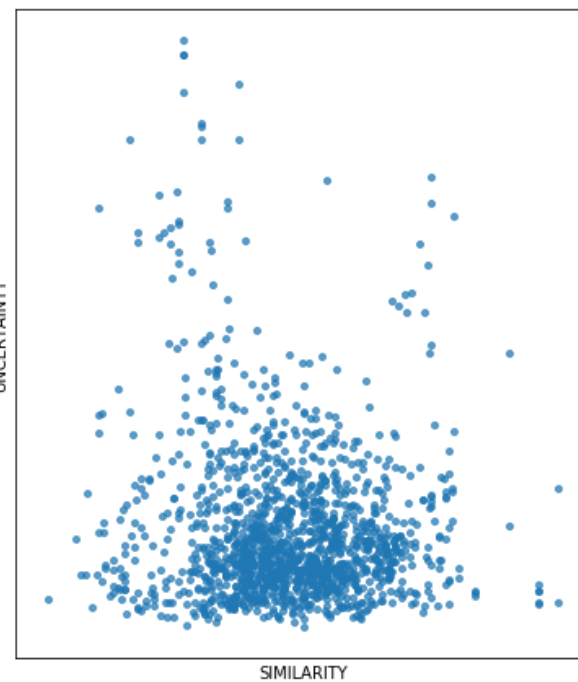

MSE

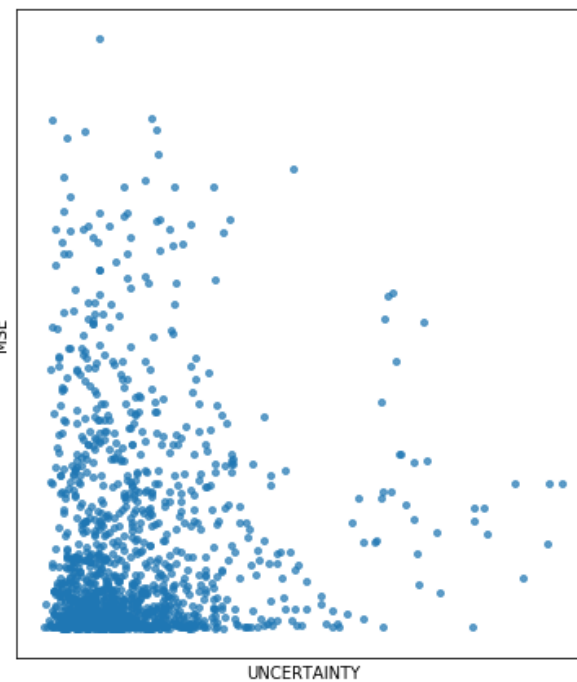

# CHEMBL217 maccs

CV

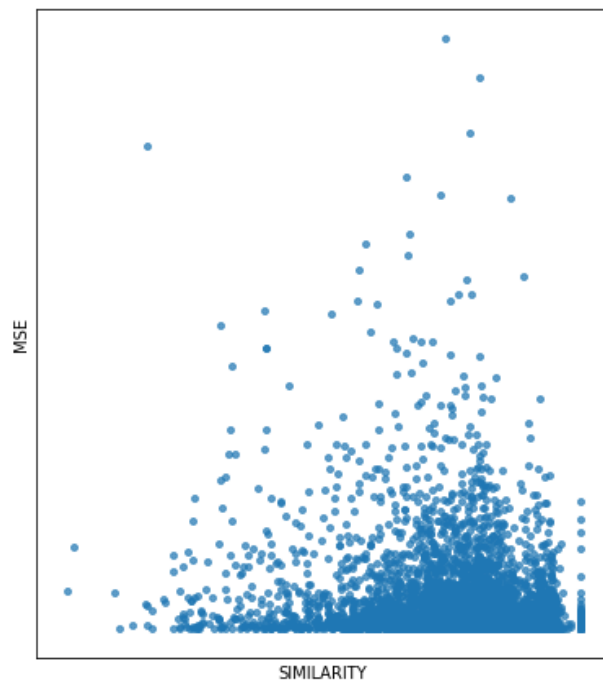

UNCERTAINTY

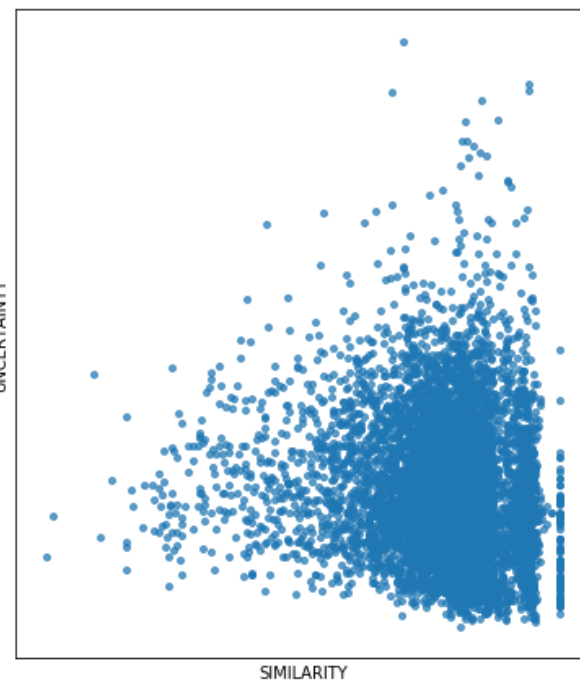

MSE

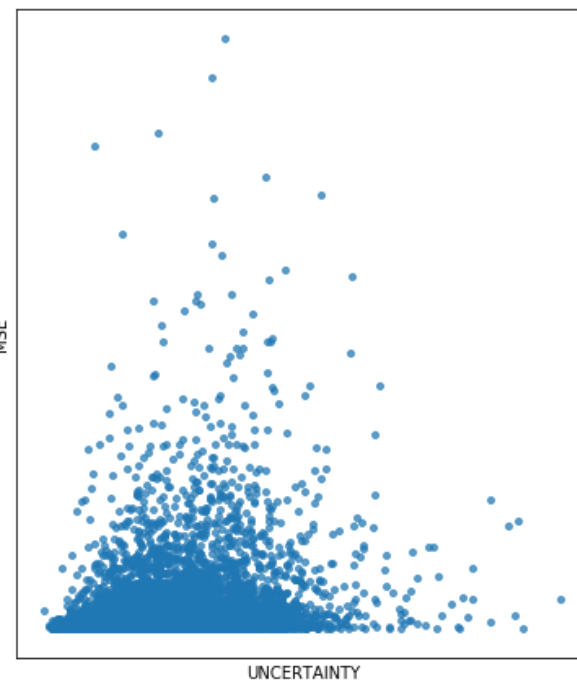

bac

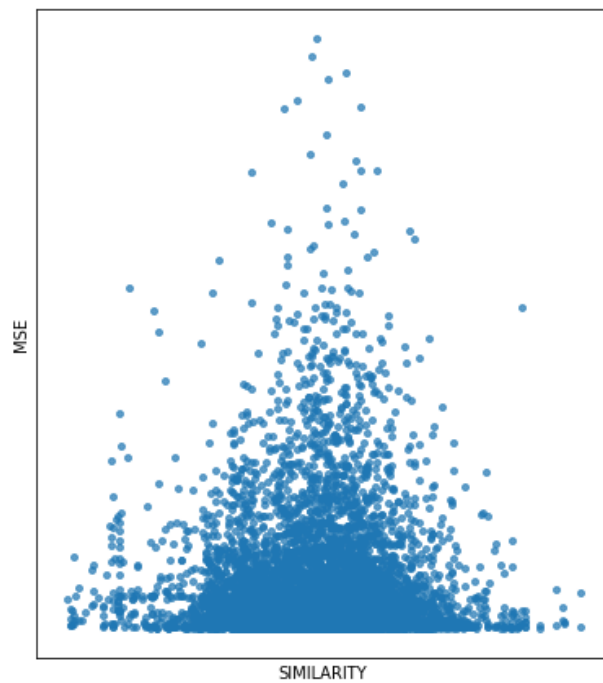

UNCERTAINTY

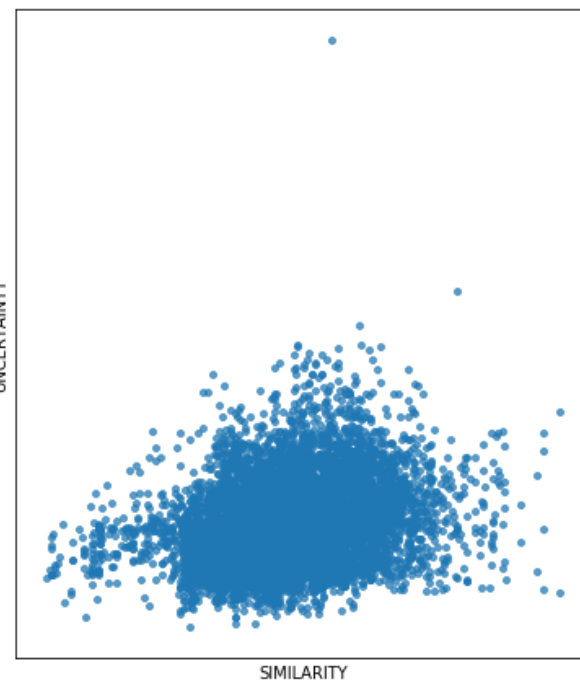

MSE

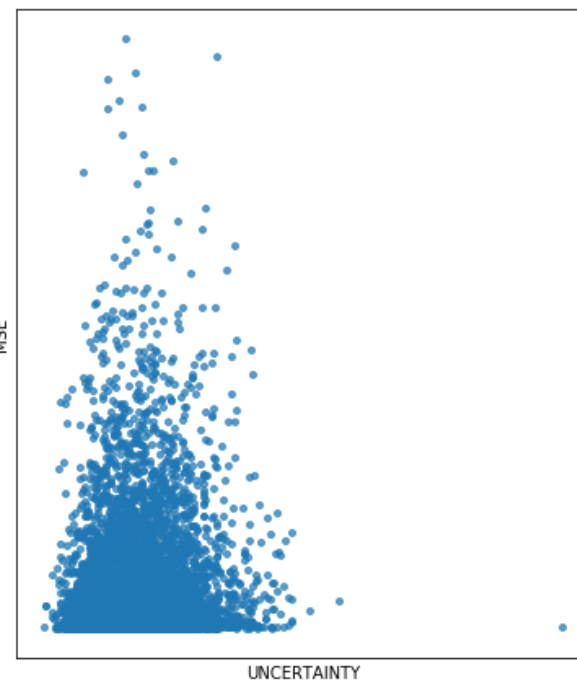



# CHEMBL224 maccs

CV

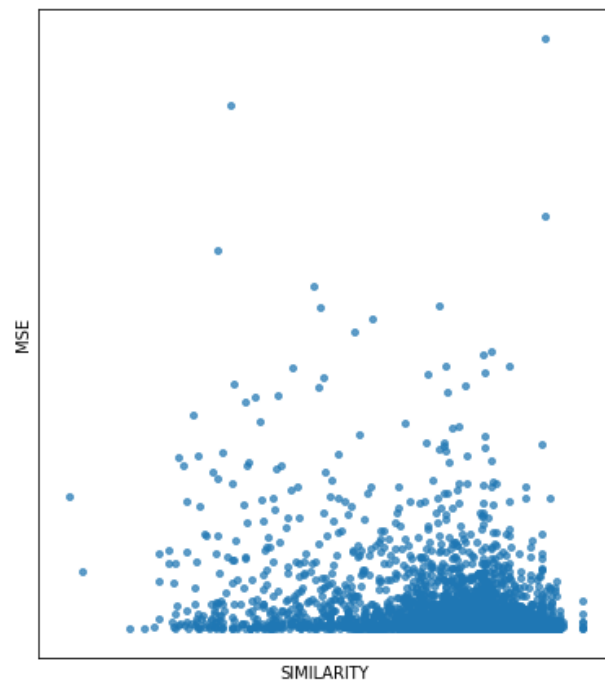

UNCERTAINTY

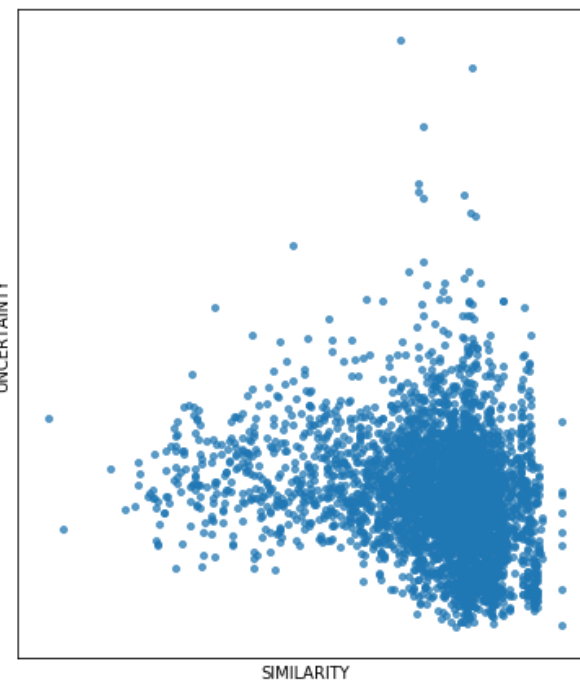

MSE

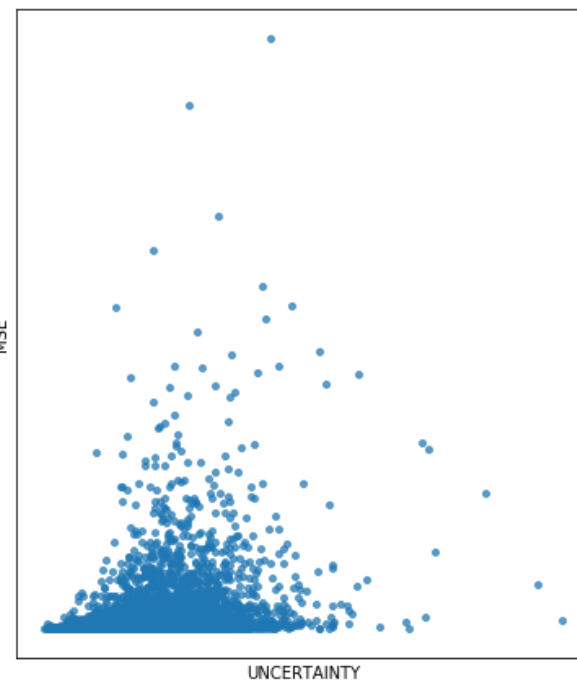

bac

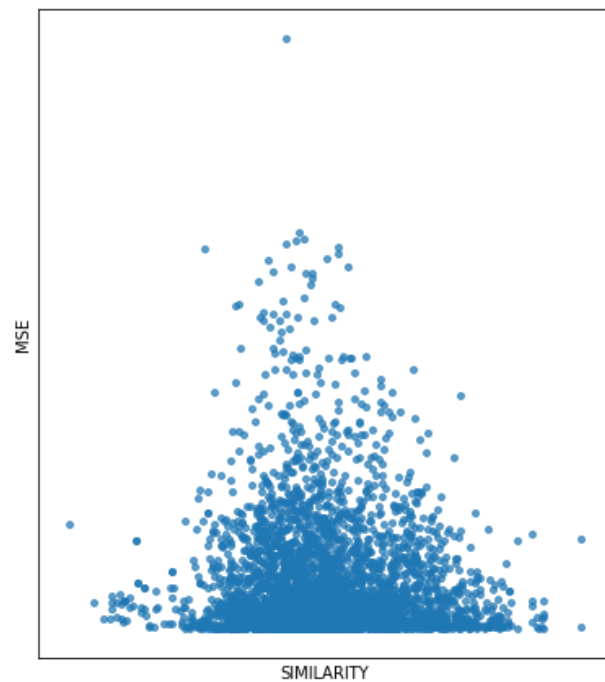

UNCERTAINTY

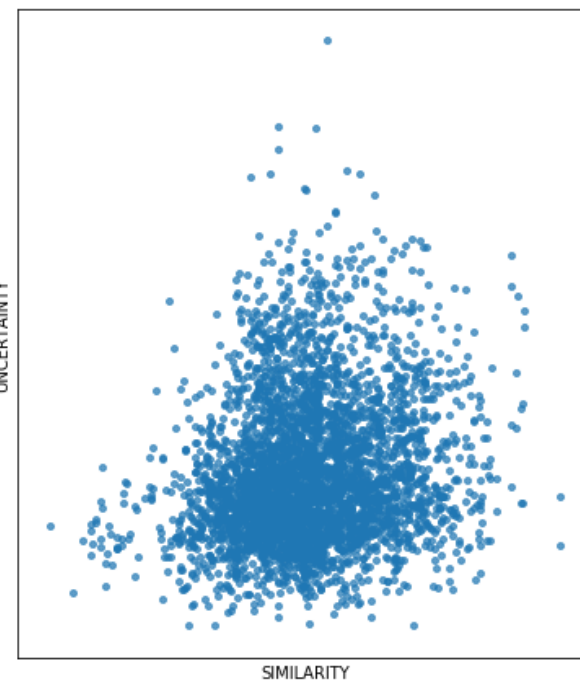

MSE

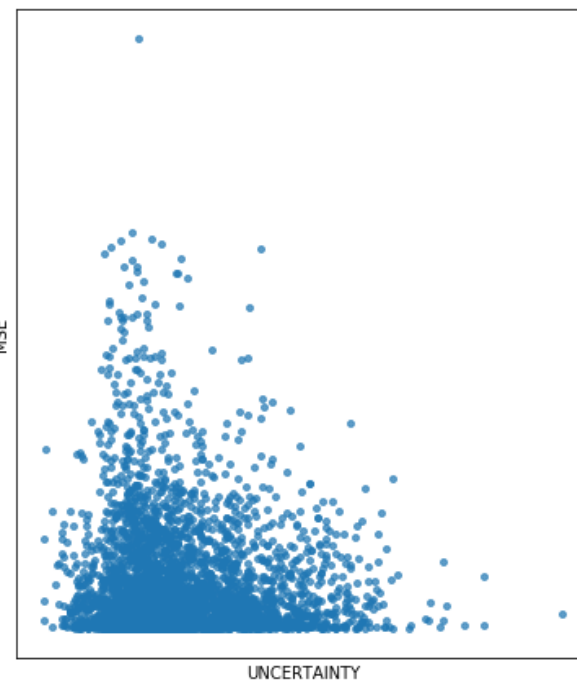

# CHEMBL225 maccs

CV

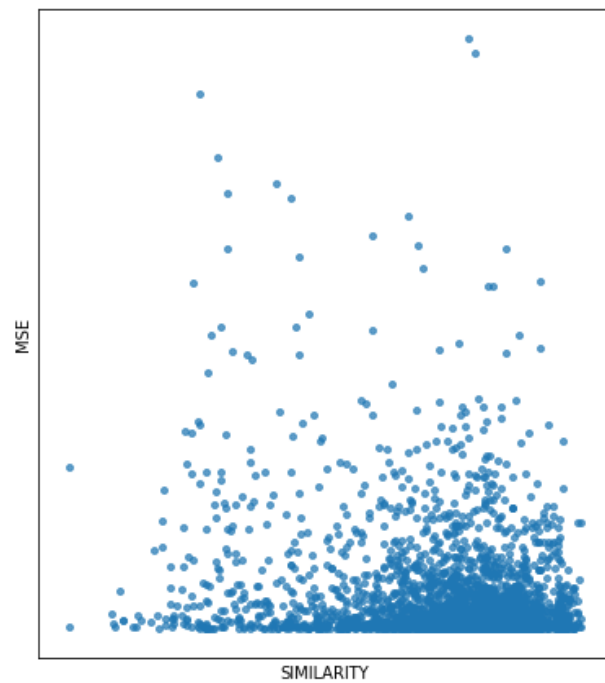

UNCERTAINTY

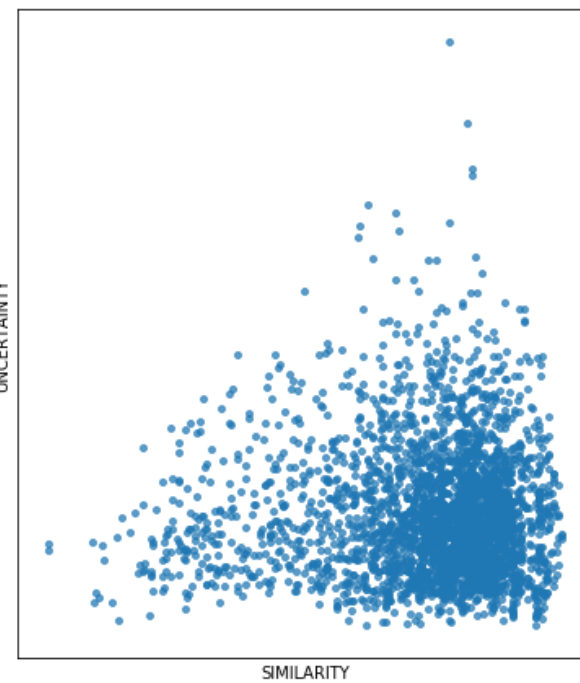

MSE

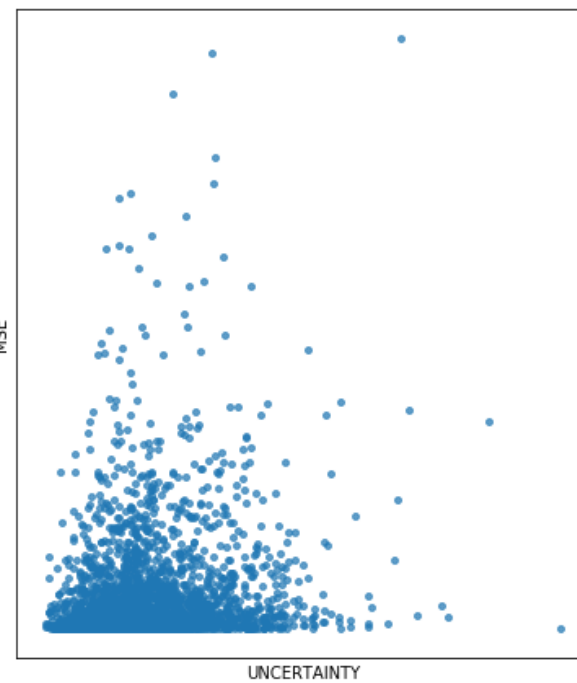

UNCERTAINTY

bac

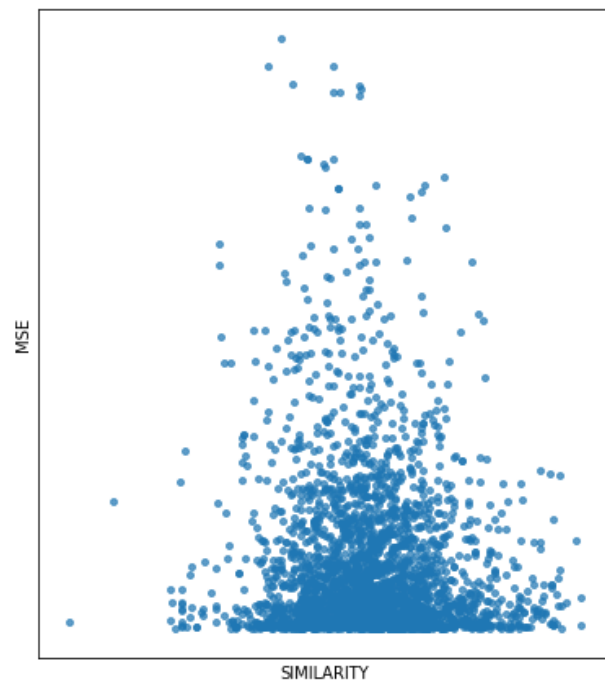

UNCERTAINTY

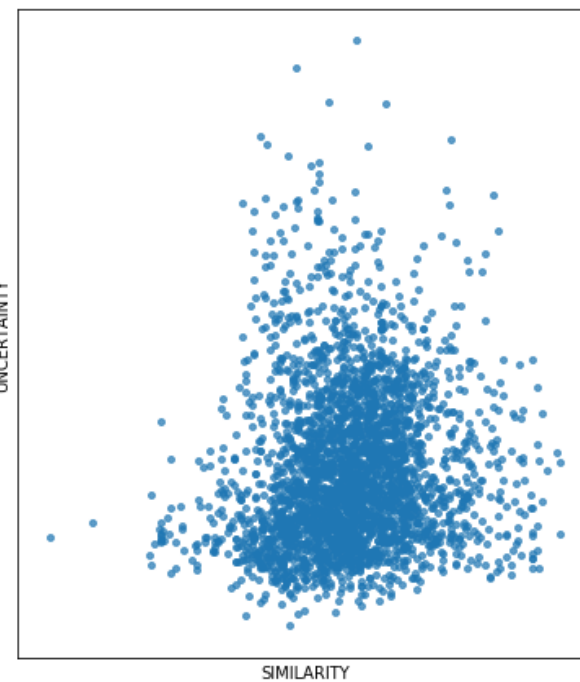

MSE

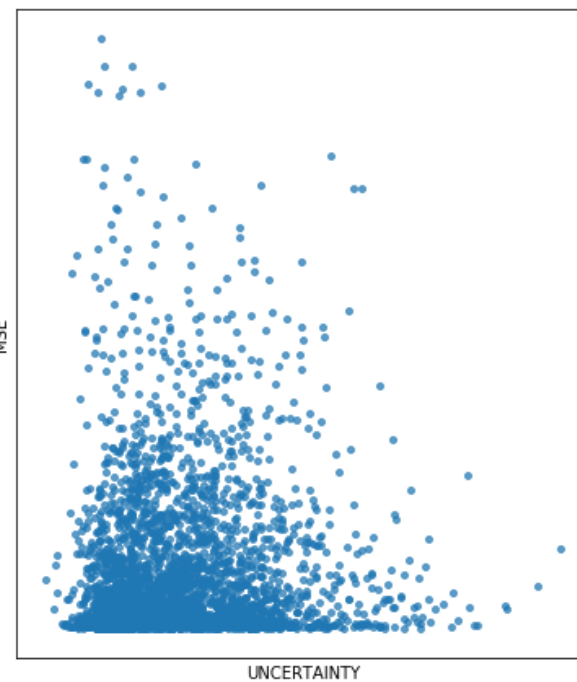

UNCERTAINTY

# CHEMBL226 maccs

CV

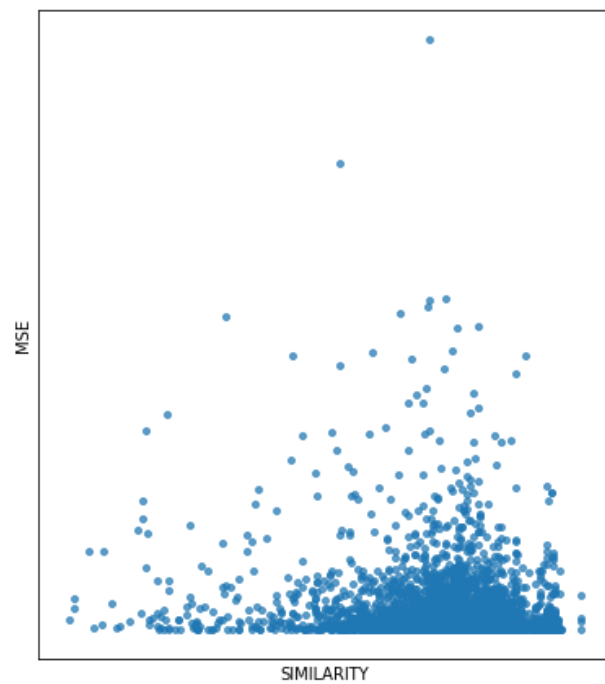

UNCERTAINTY

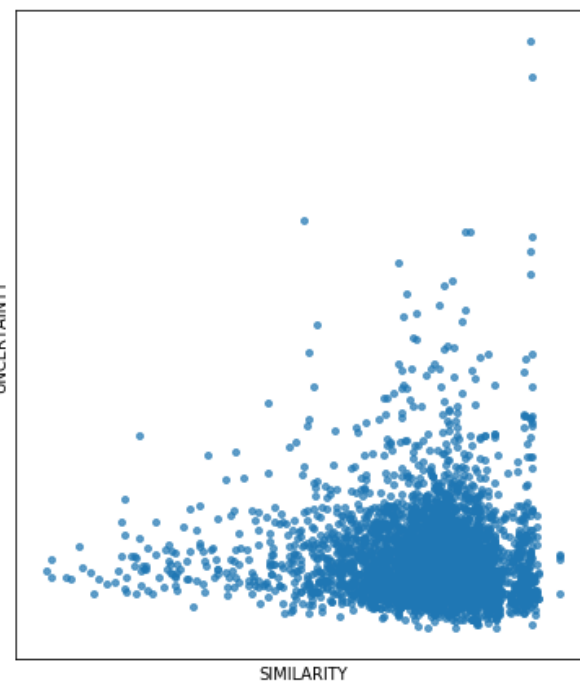

MSE

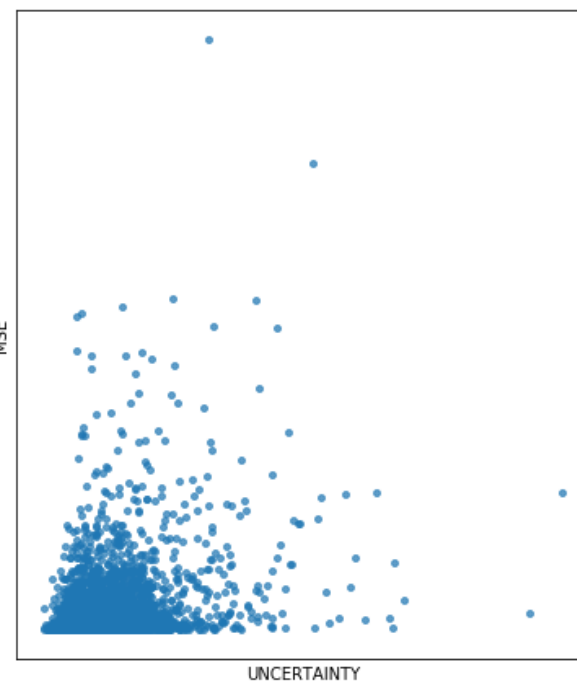

bac

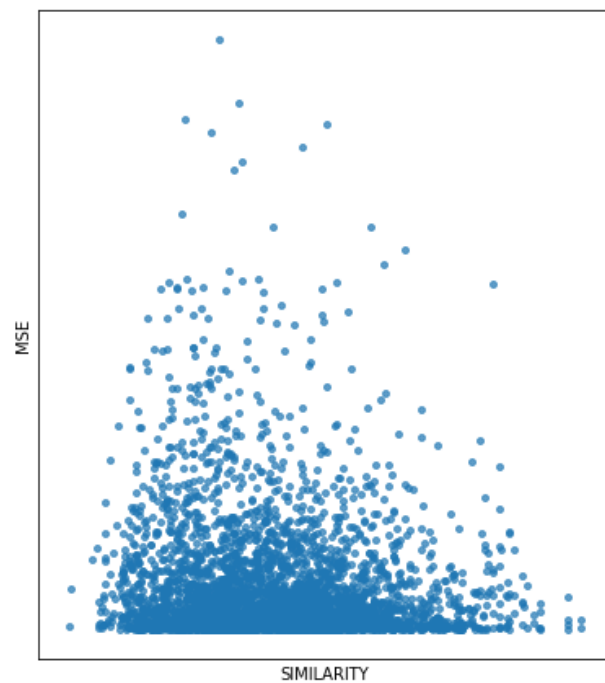

UNCERTAINTY

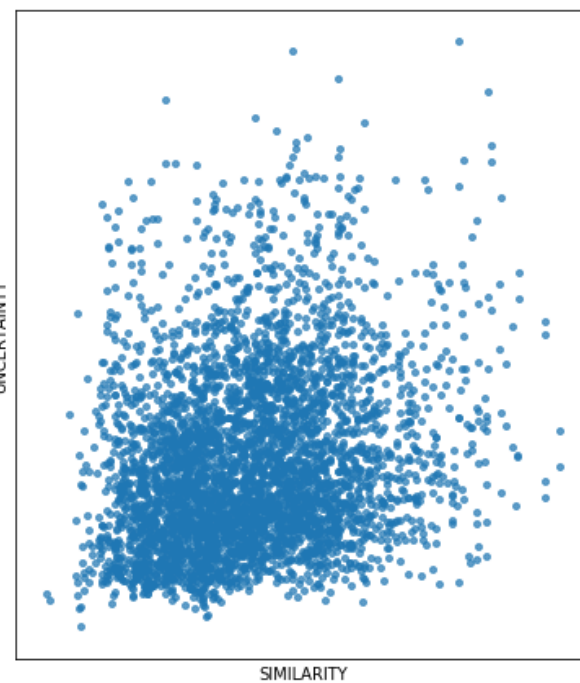

MSE

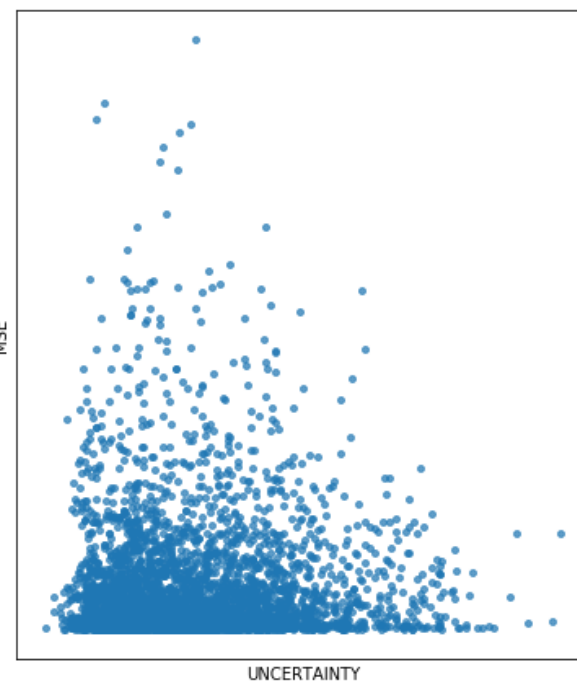

# CHEMBL251 maccs

CV

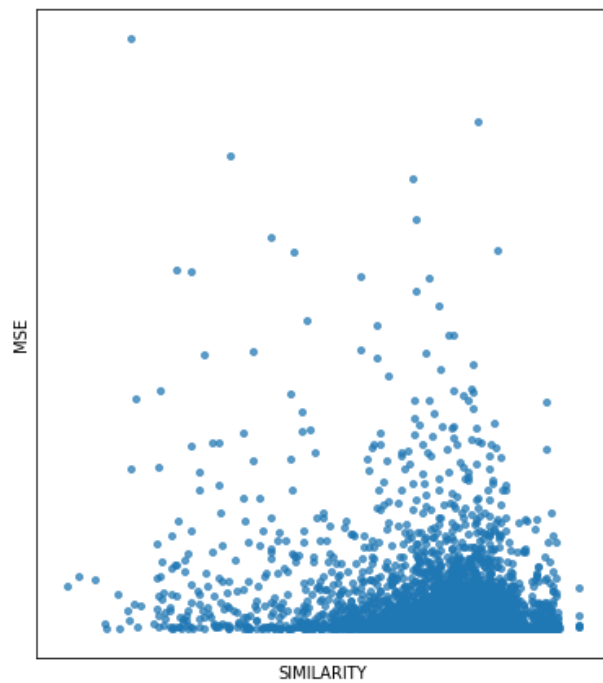

UNCERTAINTY

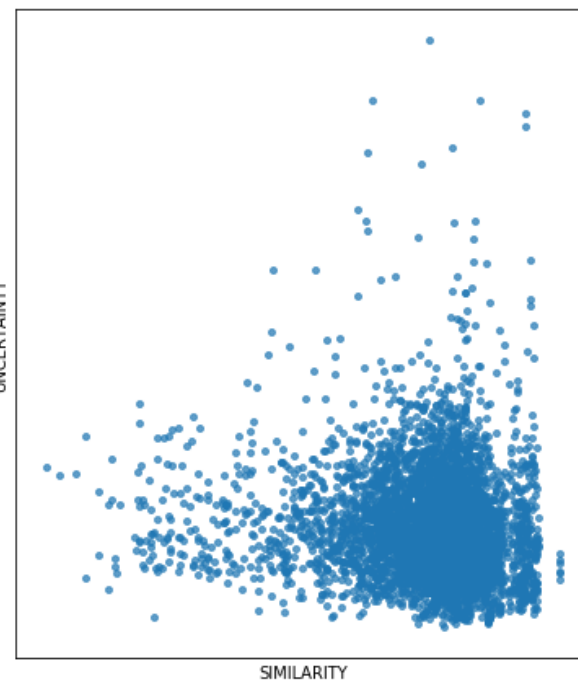

MSE

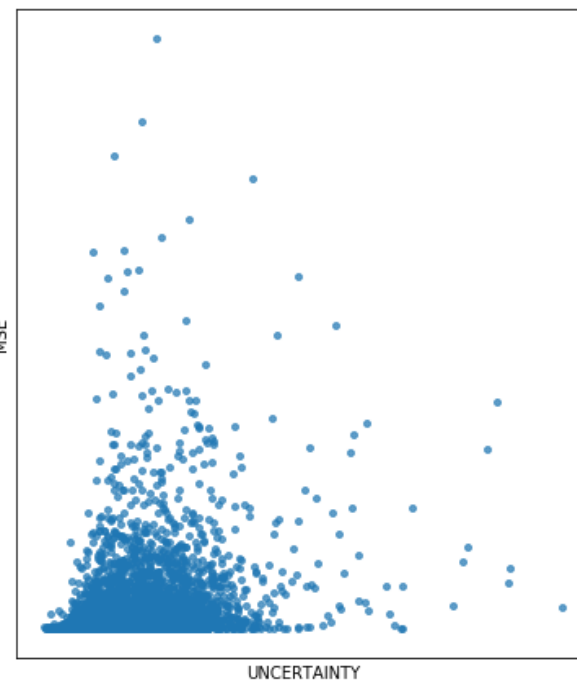

bac

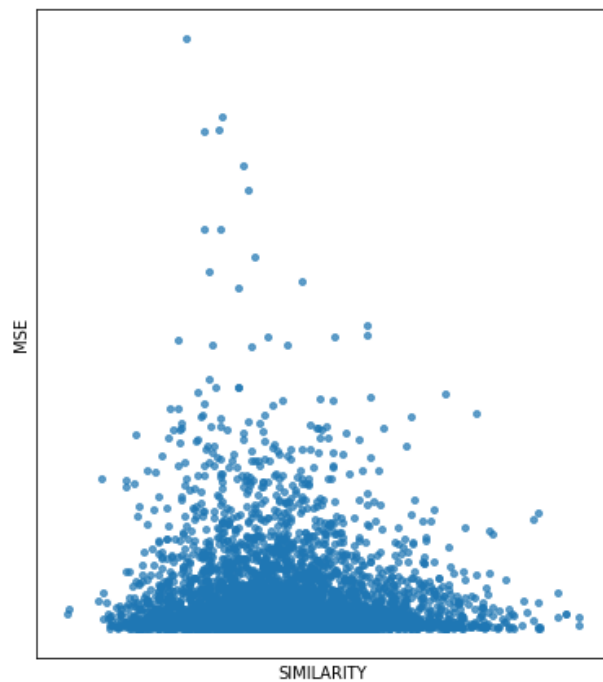

UNCERTAINTY

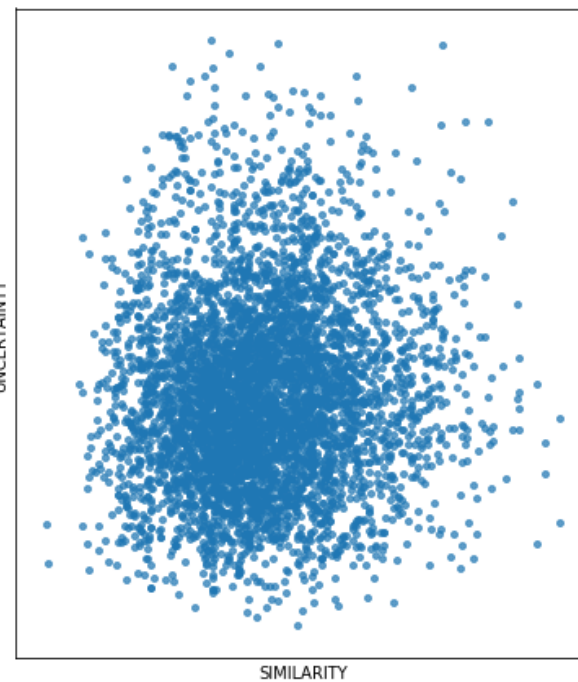

MSE

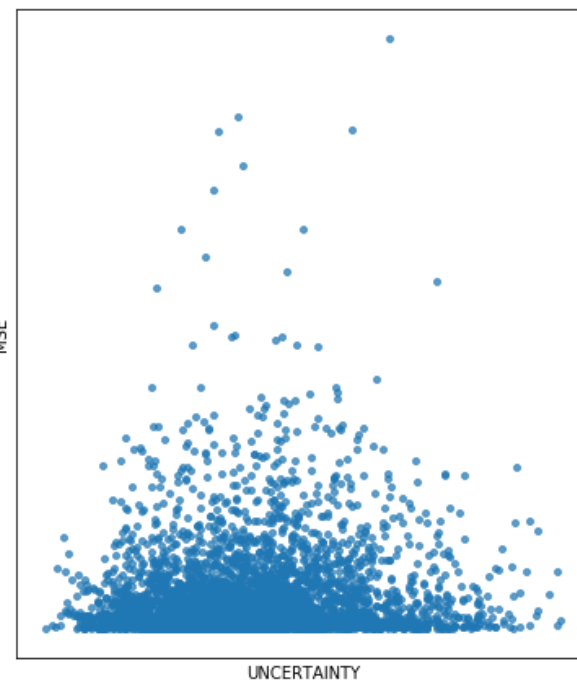

# CHEMBL264 maccs

CV

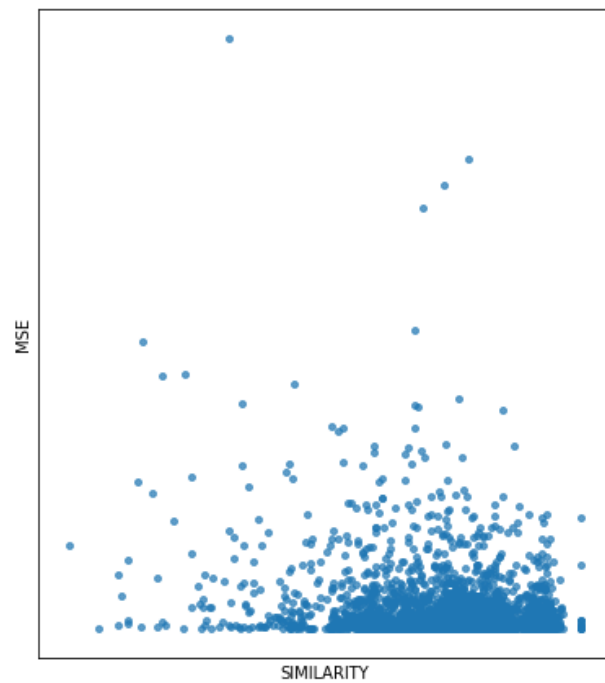

UNCERTAINTY

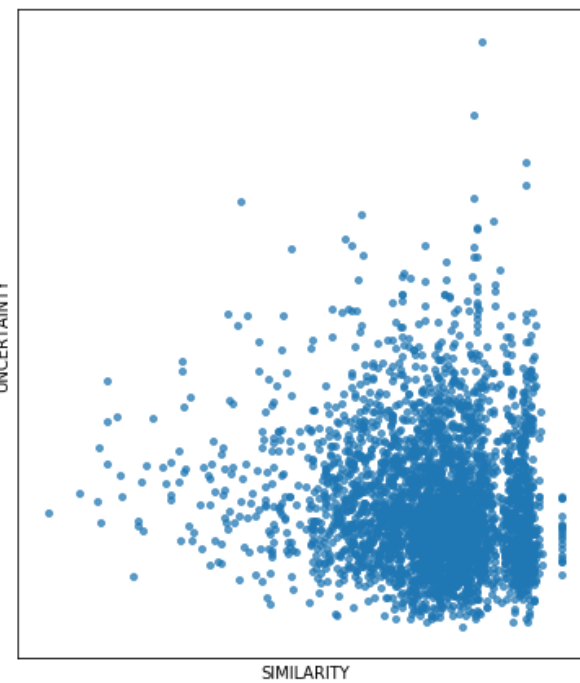

MSE

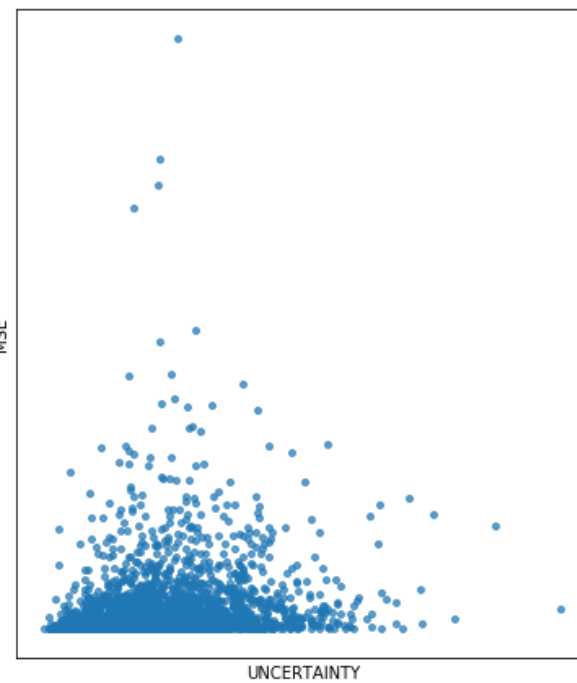

bac

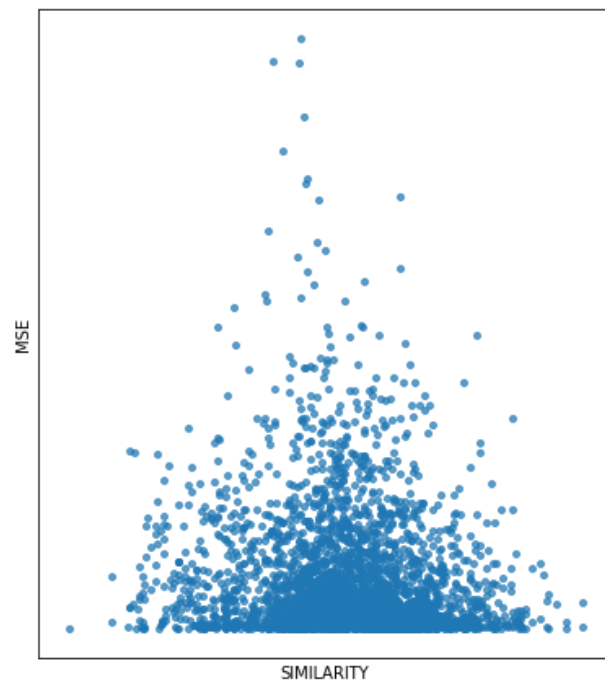

UNCERTAINTY

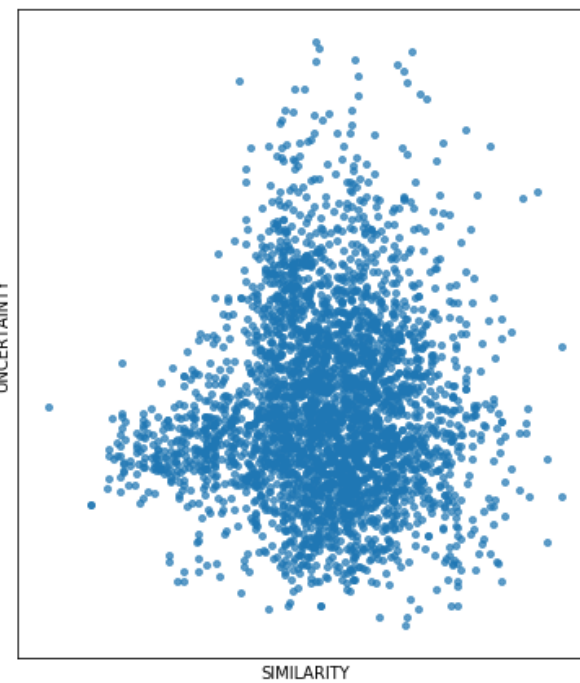

MSE

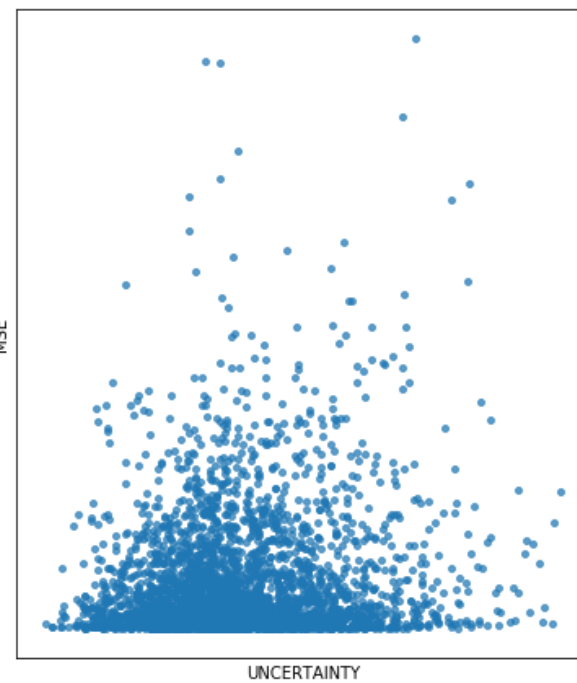



# CHEMBL3155 maccs

CV

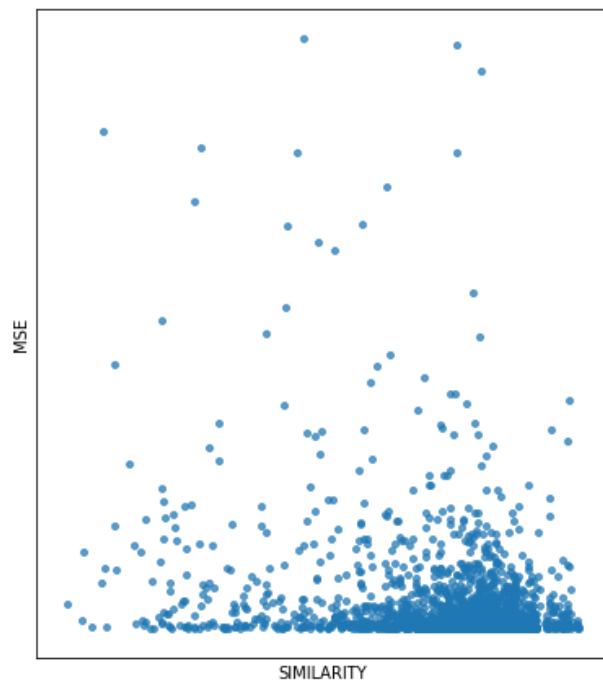

UNCERTAINTY

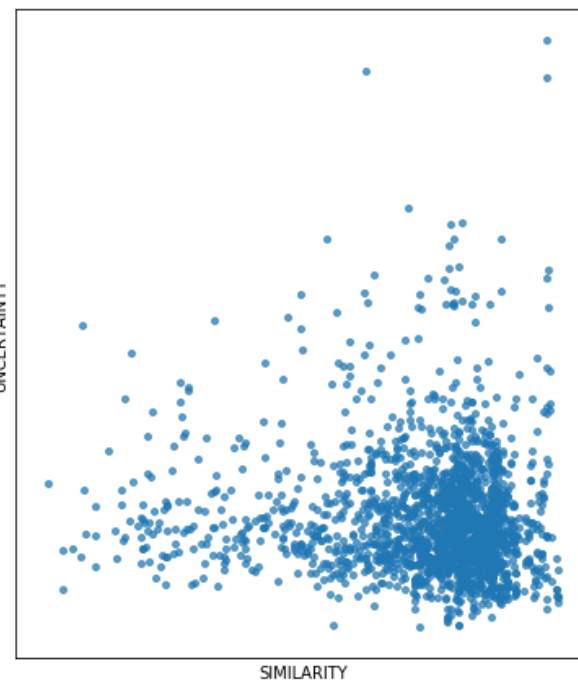

MSE

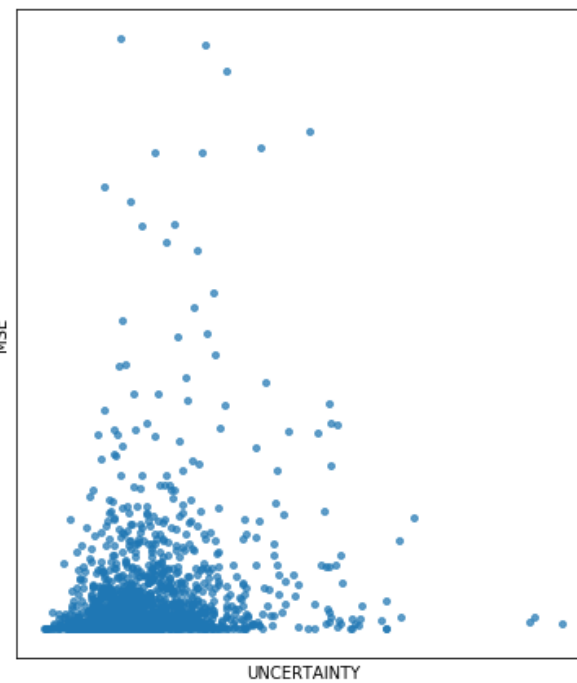

bac

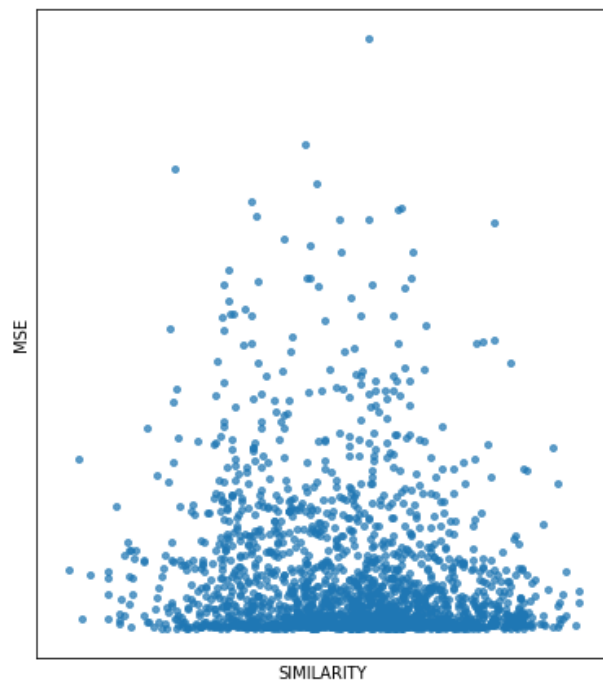

UNCERTAINTY

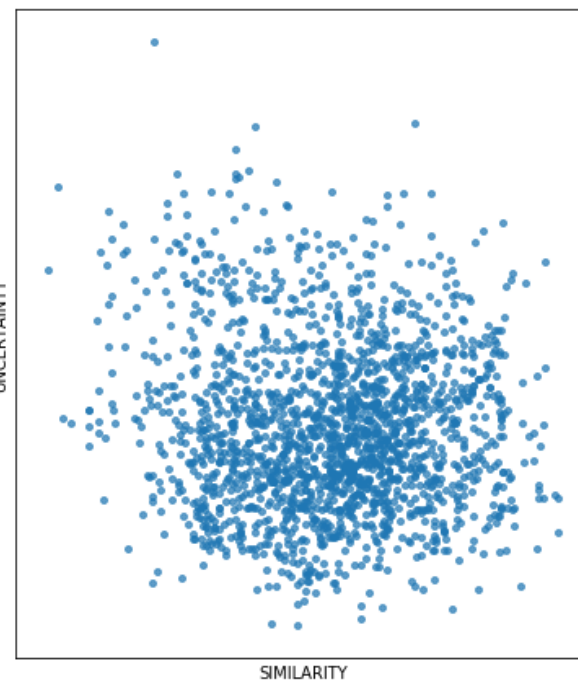

MSE

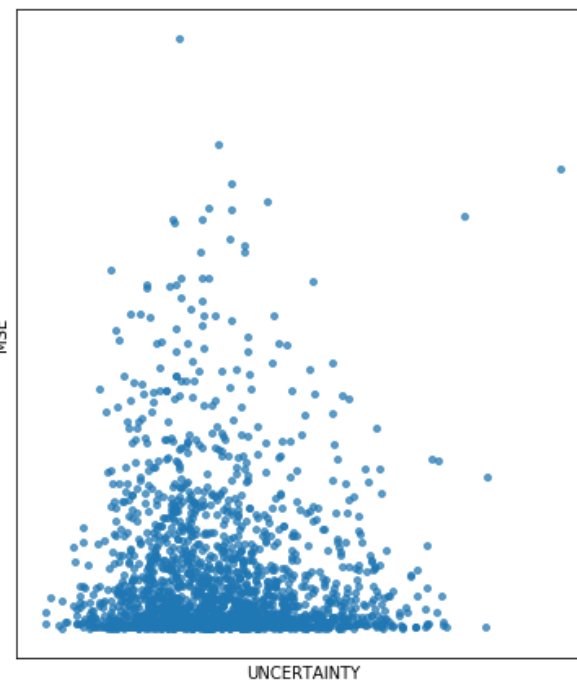

# CHEMBL3371 maccs

CV

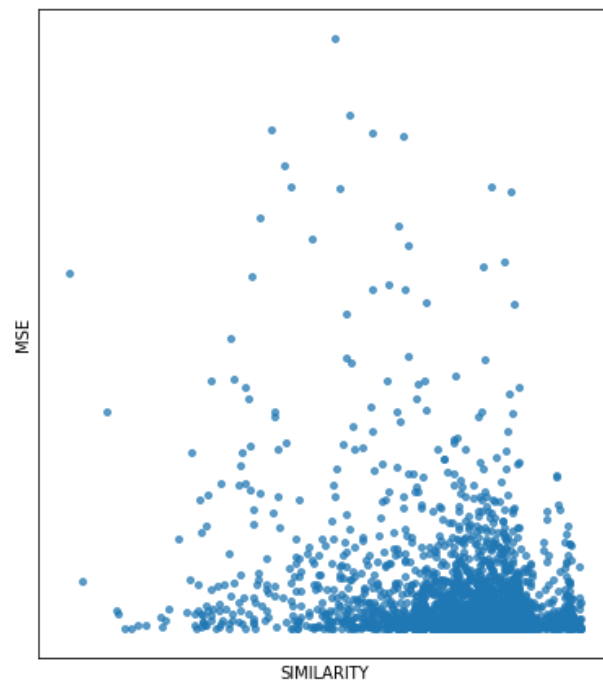

UNCERTAINTY

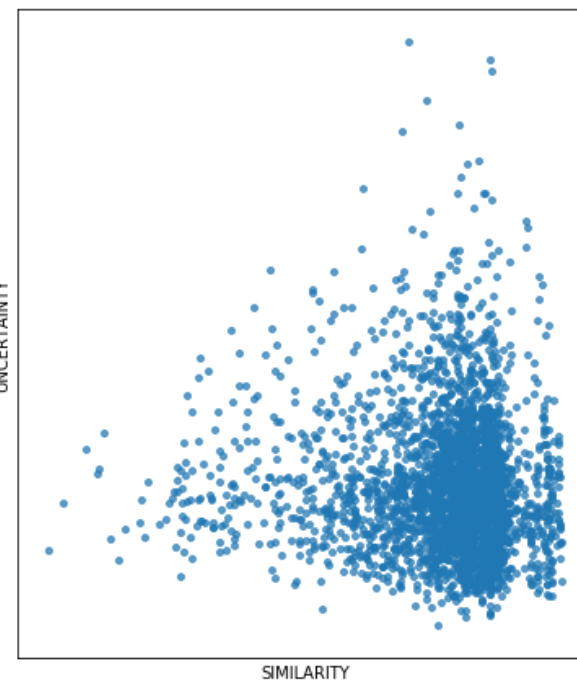

MSE

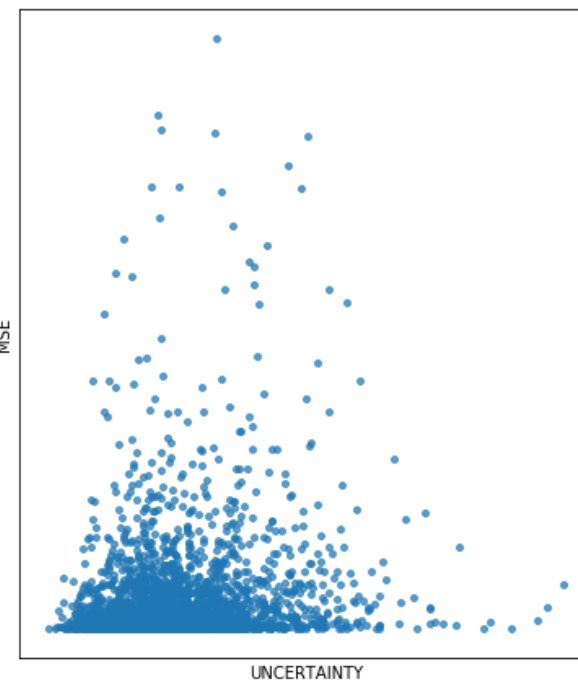

bac

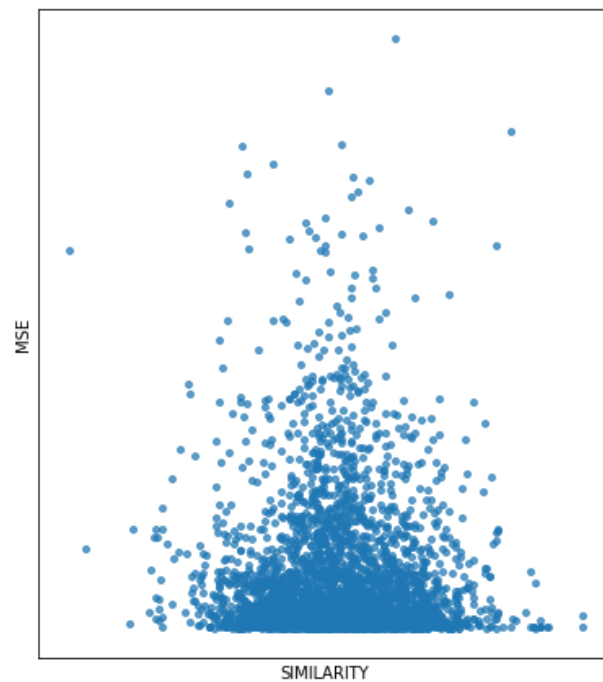

UNCERTAINTY

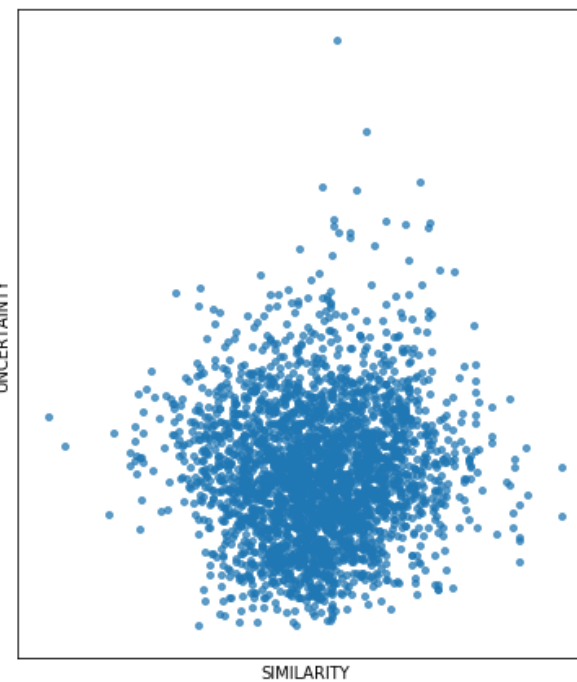

MSE

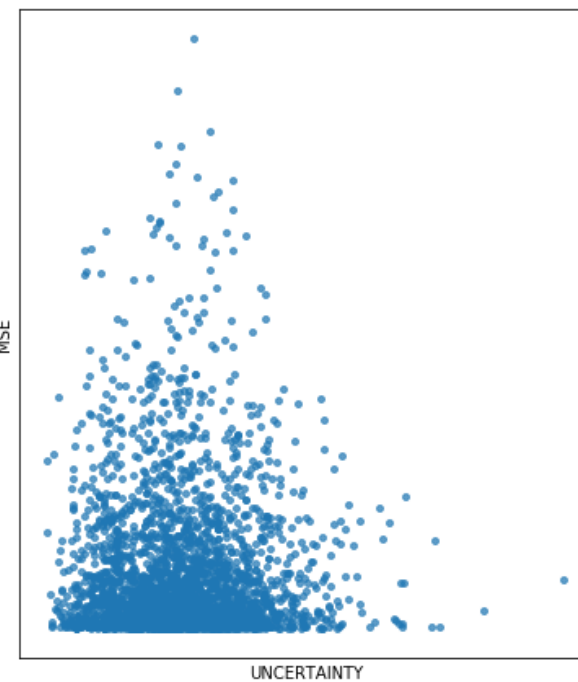

Supplement: s1 [file s1]
