# Supplementary material for: How Sure Can We Be about ML Methods-Based Evaluation of Compound Activity: Incorporation of Information about Prediction Uncertainty Using Deep Learning Techniques
Source: MDPI journal article supplement (doi:10.3390/molecules25061452), 2020-03-23
Supplement: s1 [file s1]

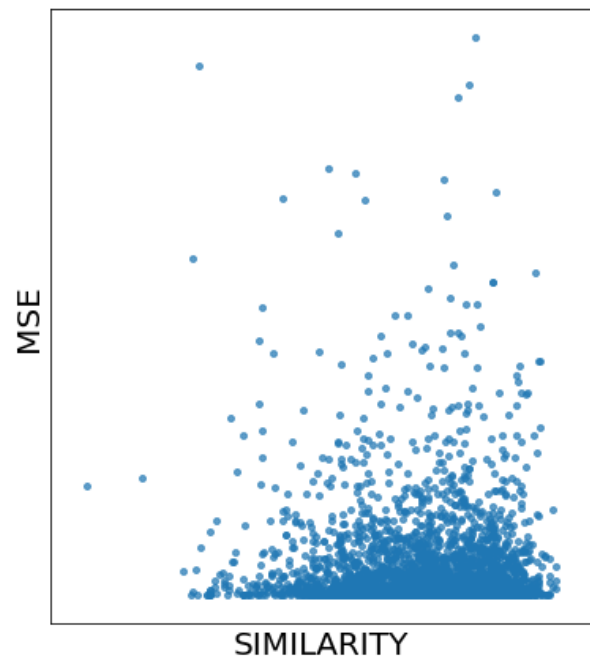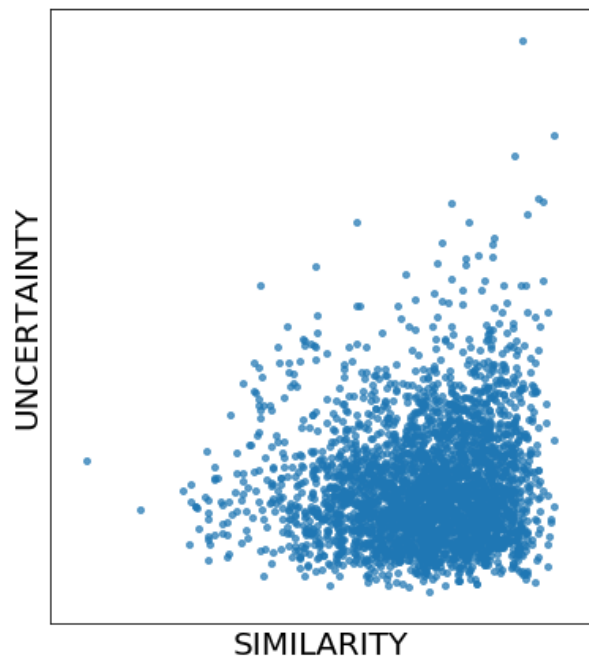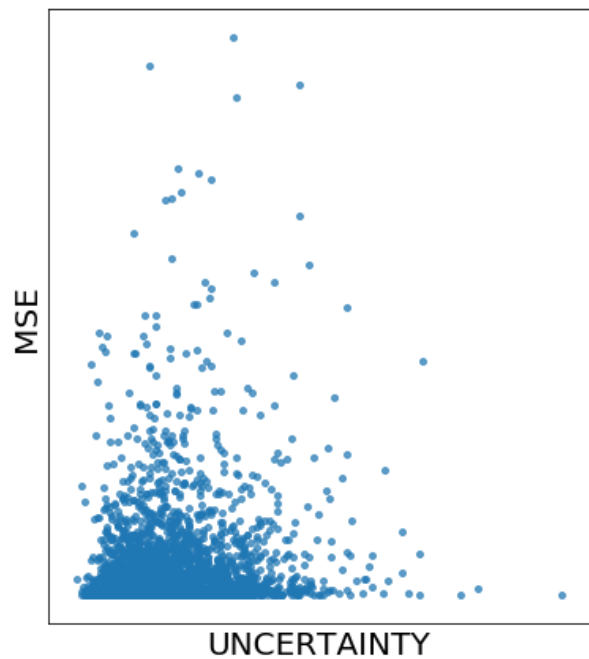

CV

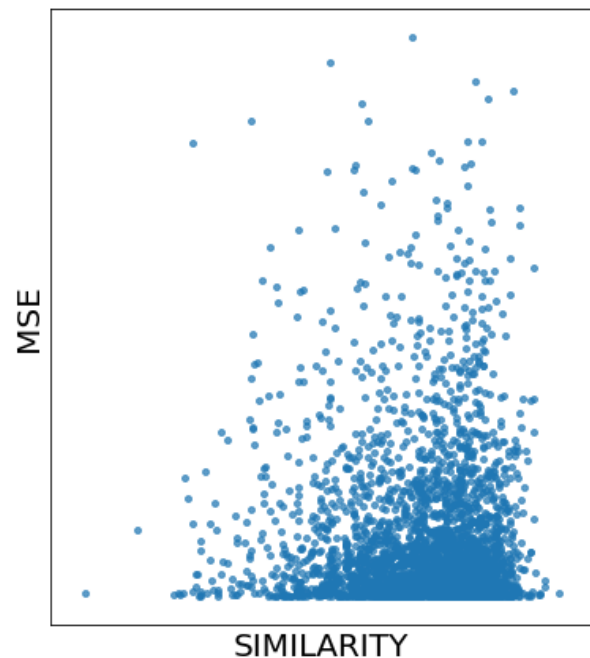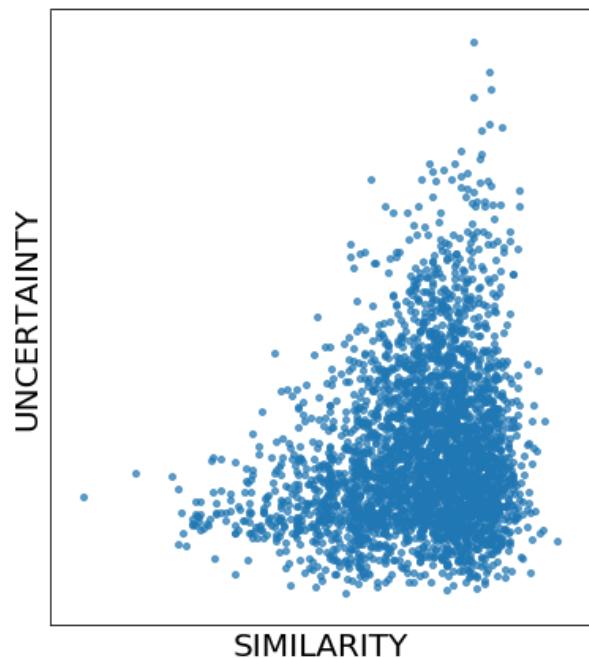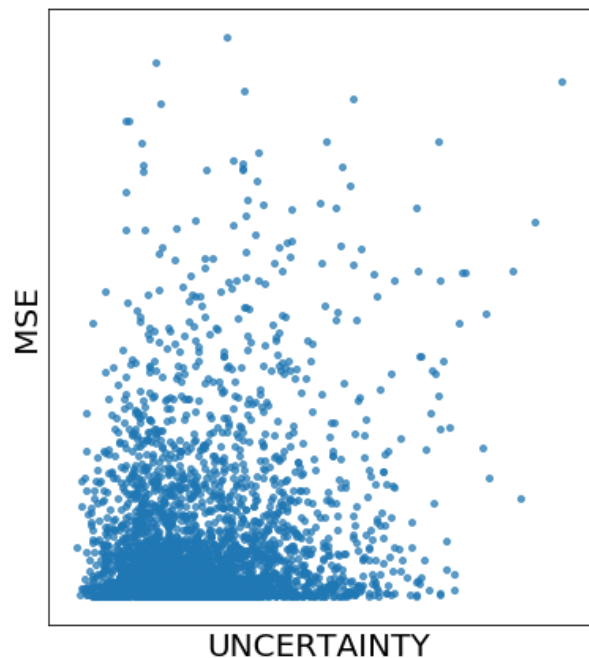

BAC

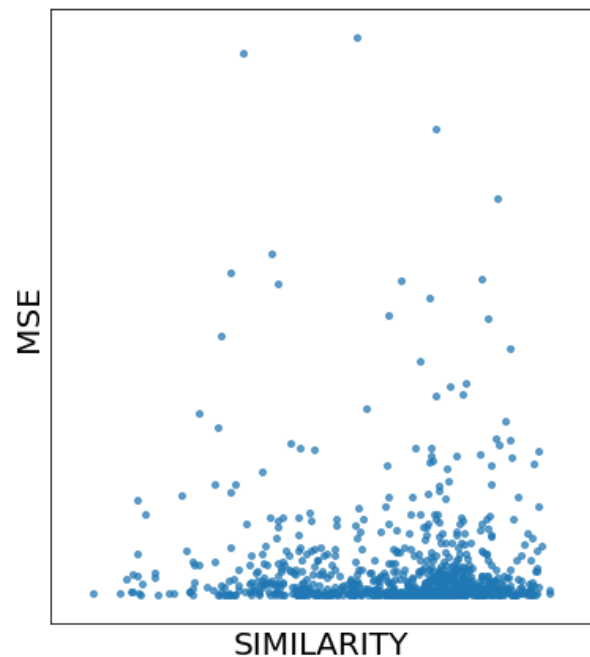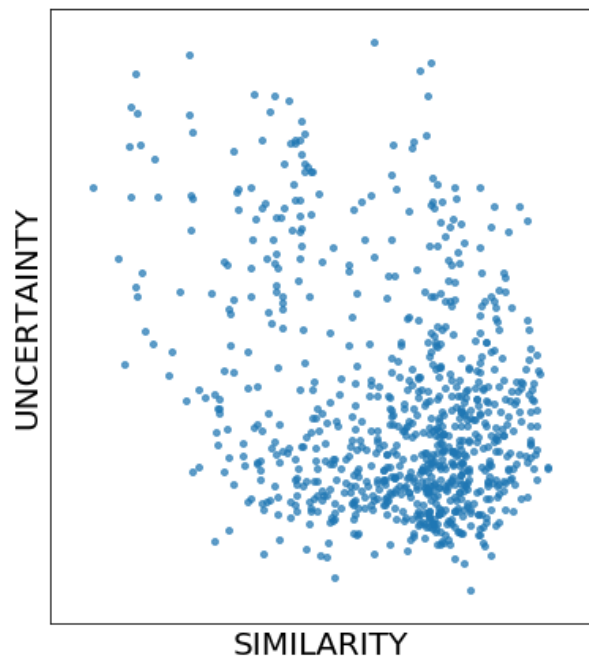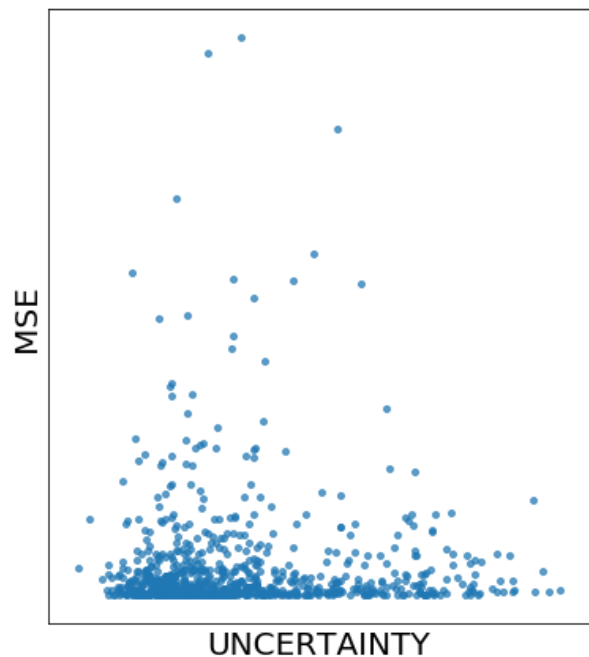

CV

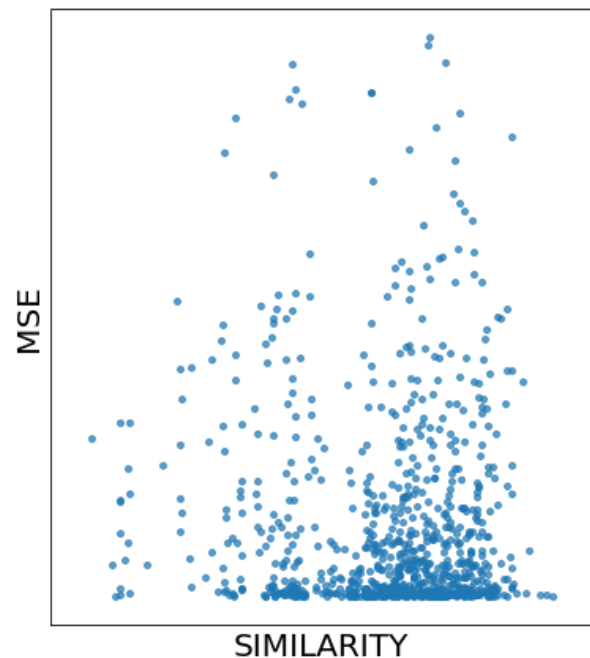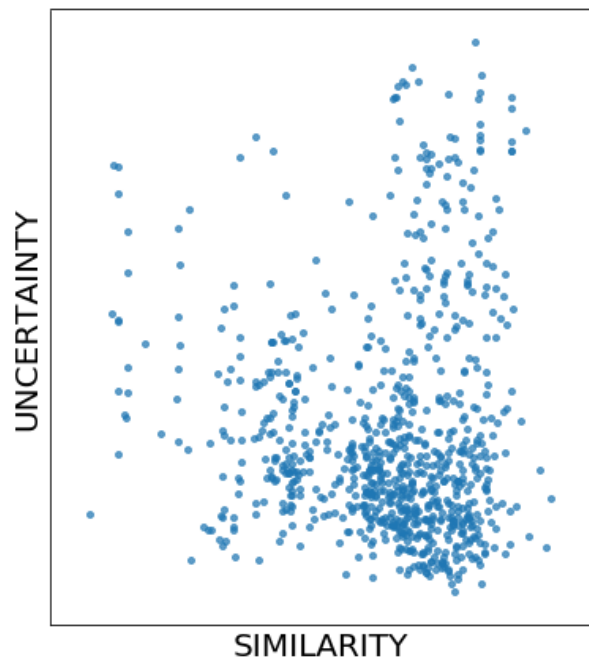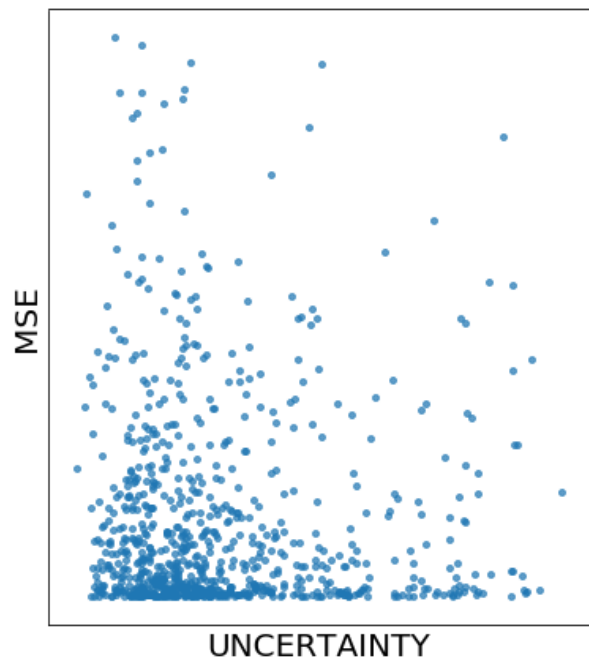

BAC

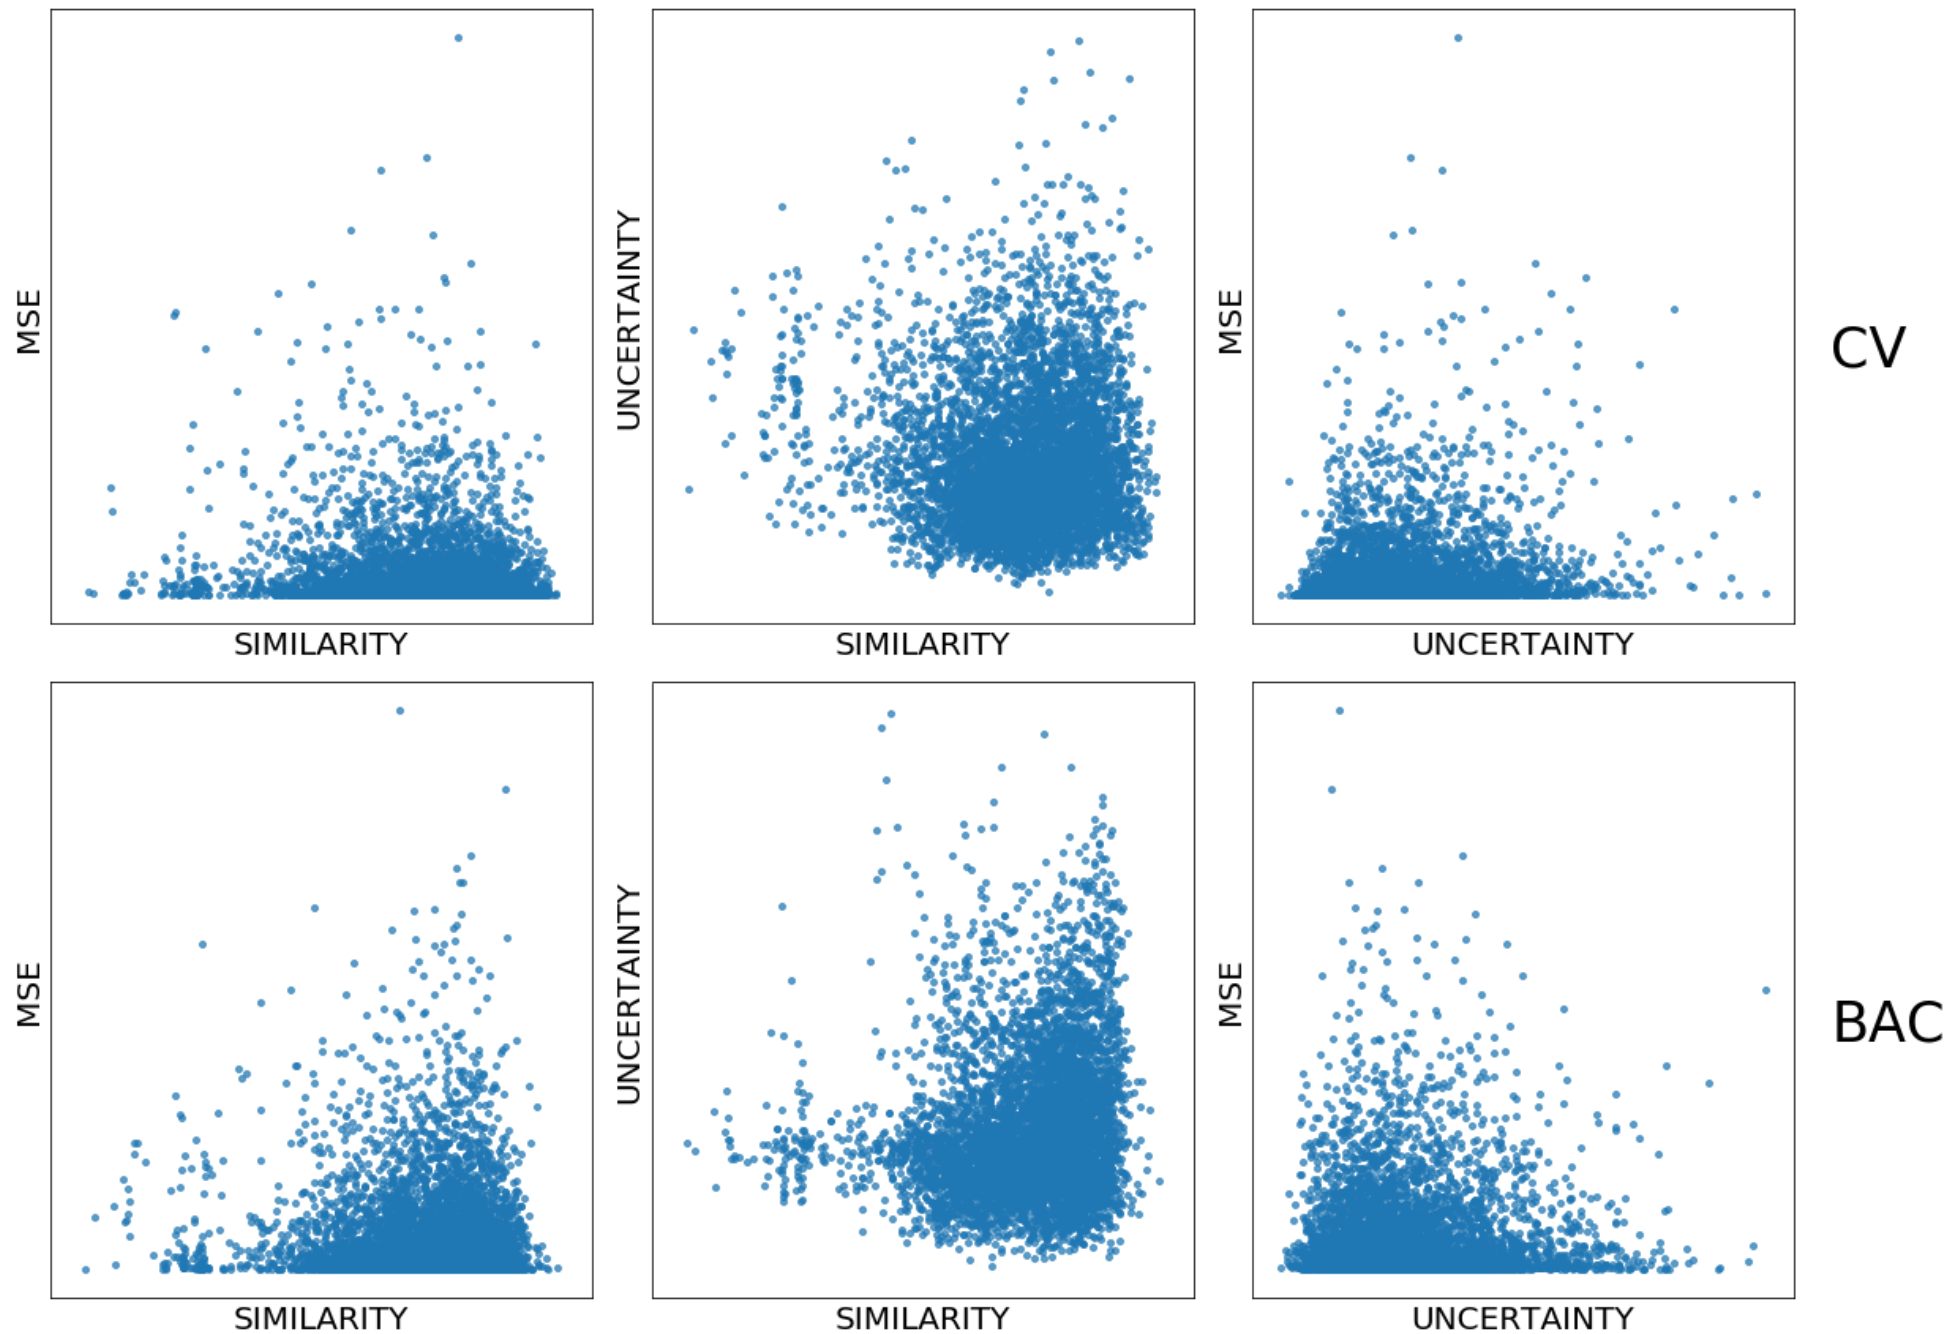

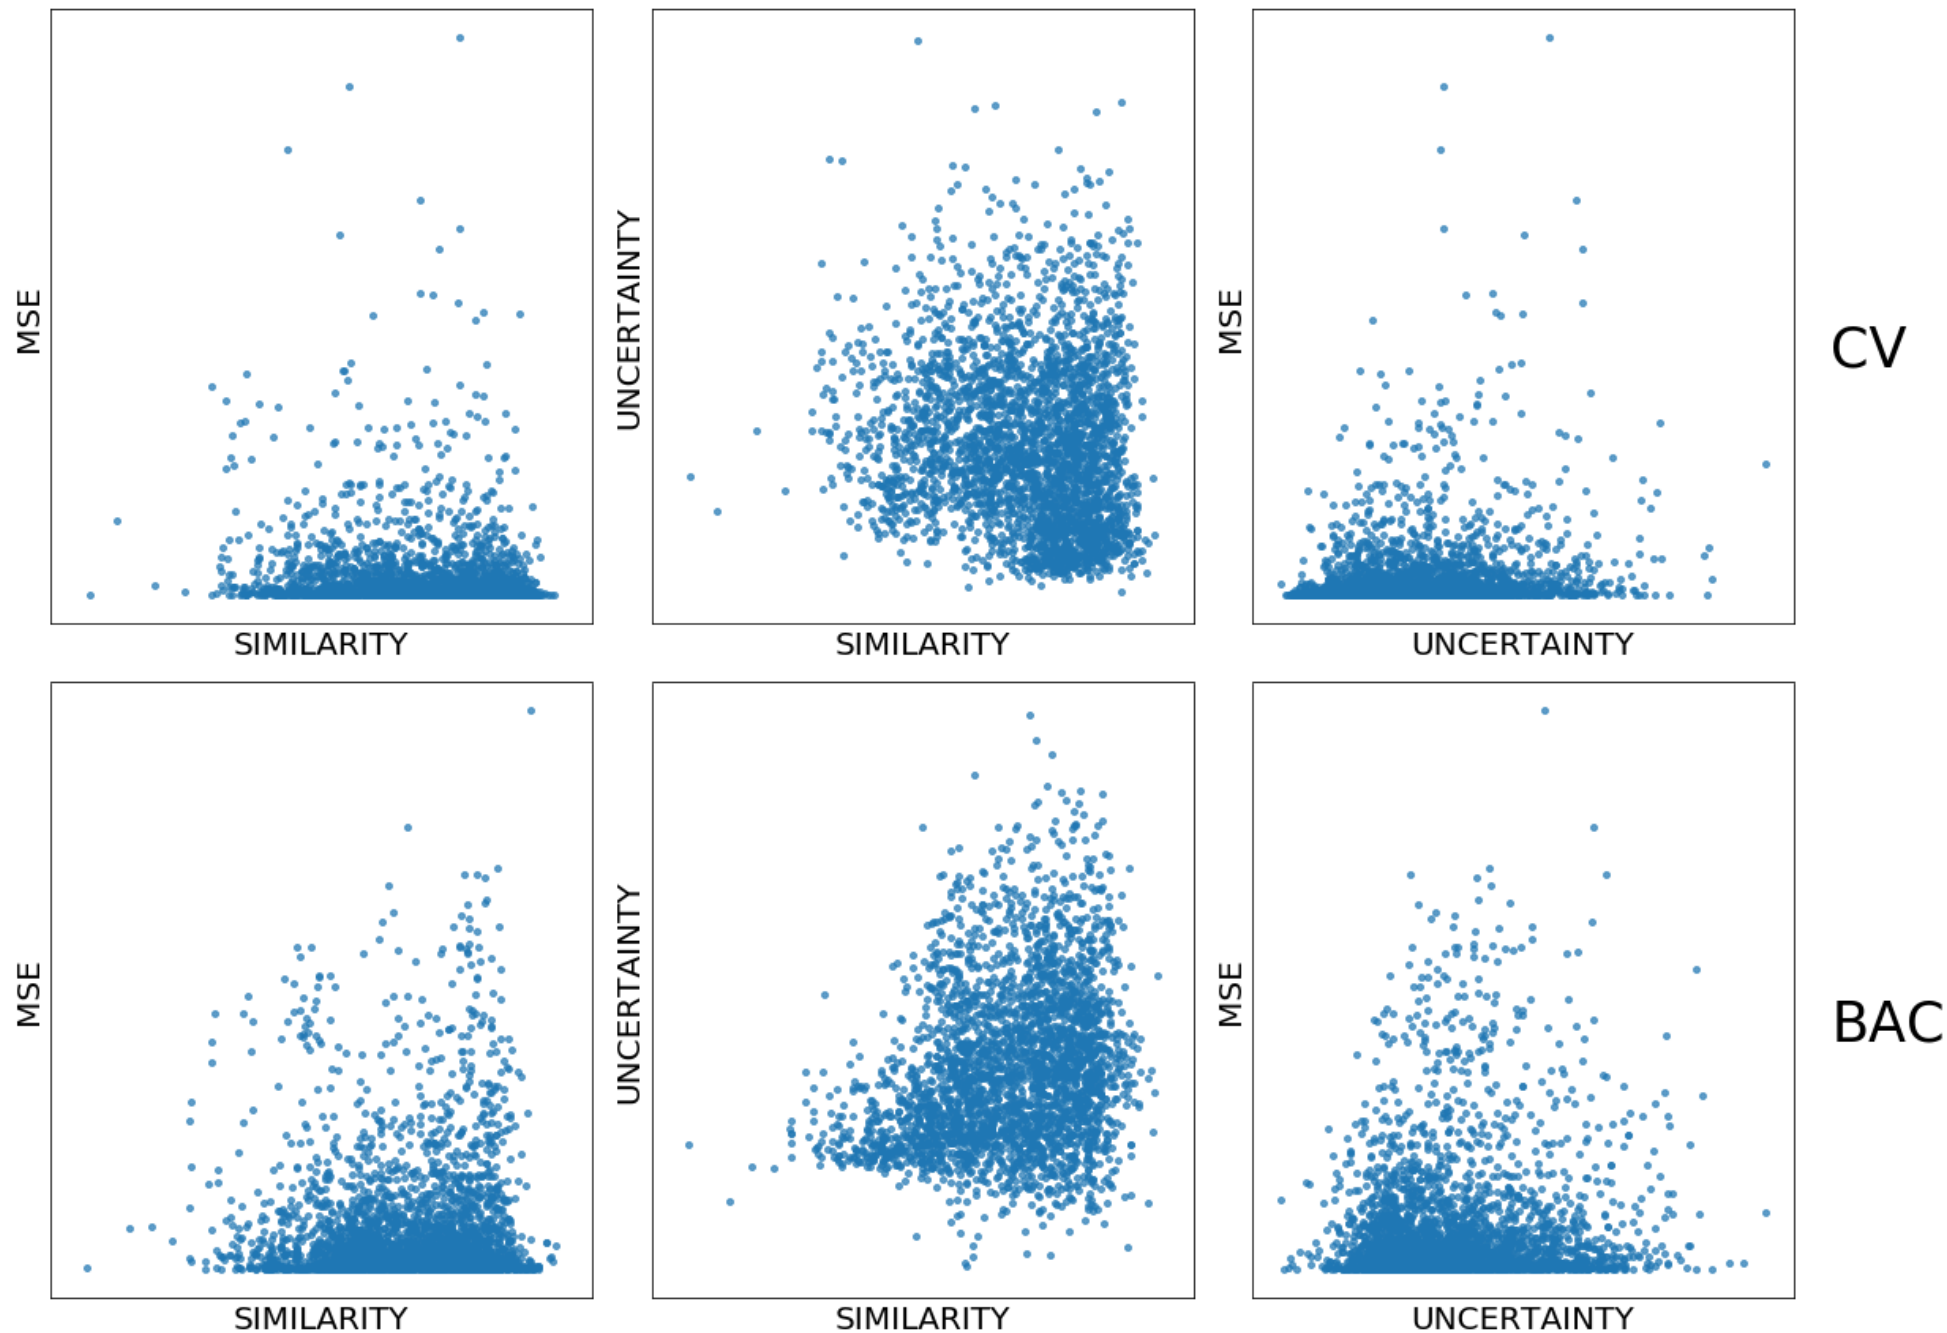

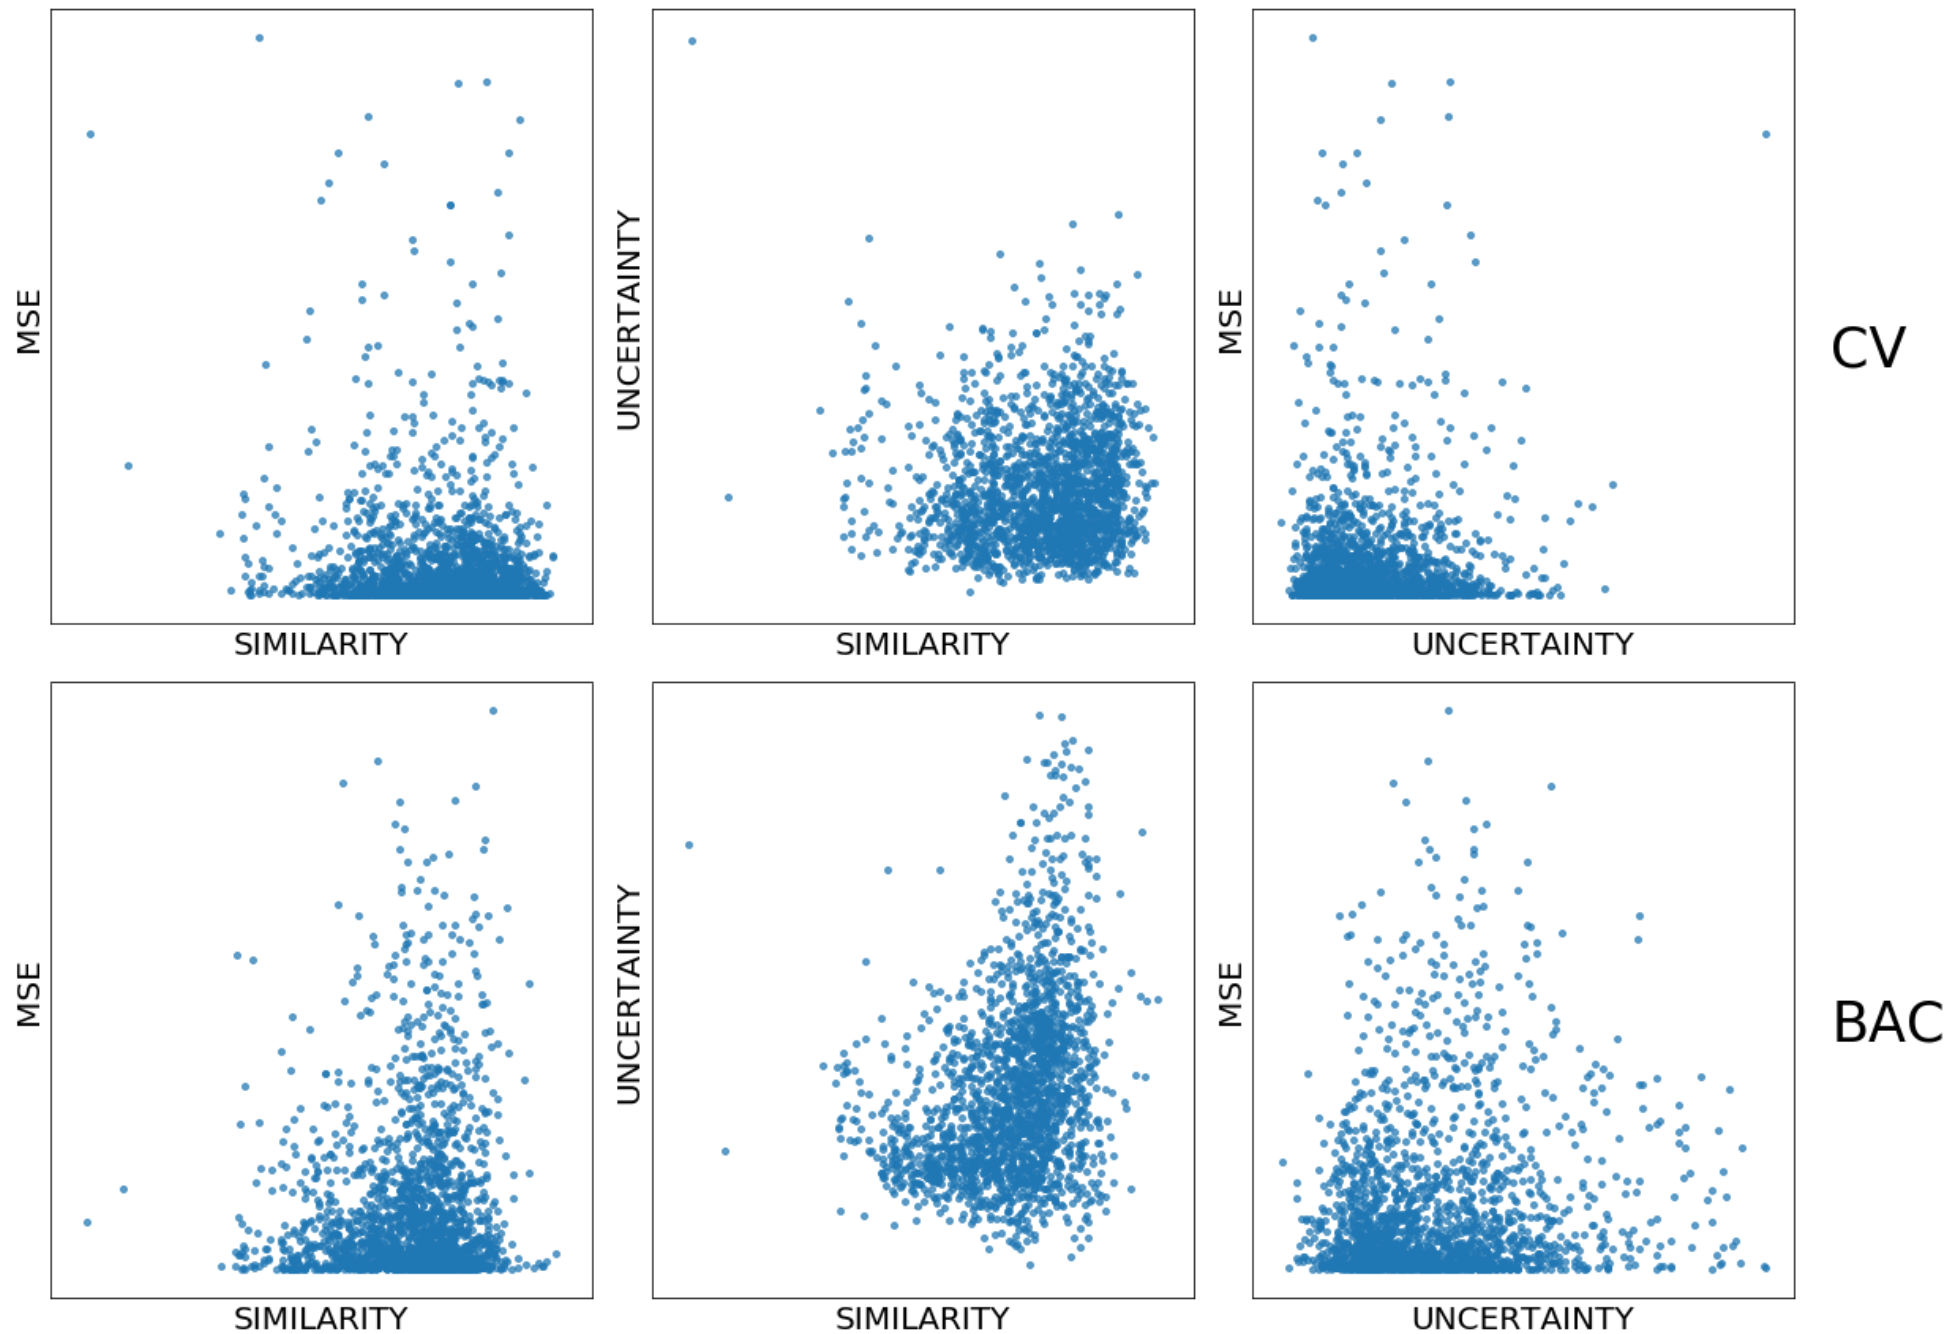



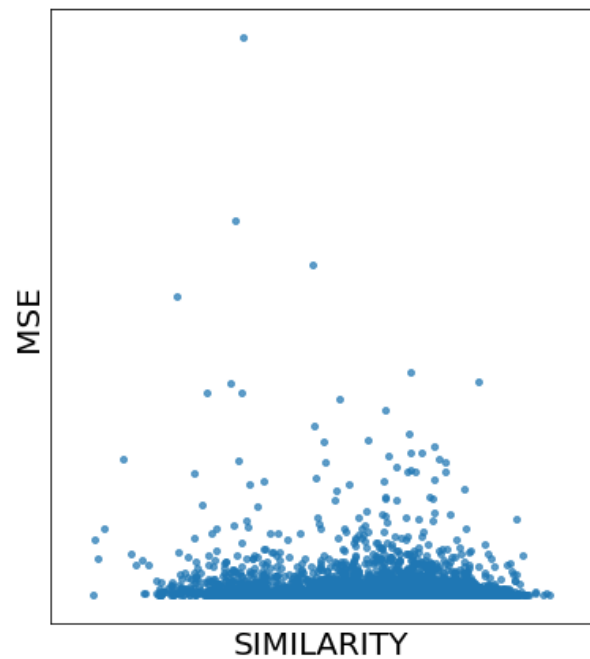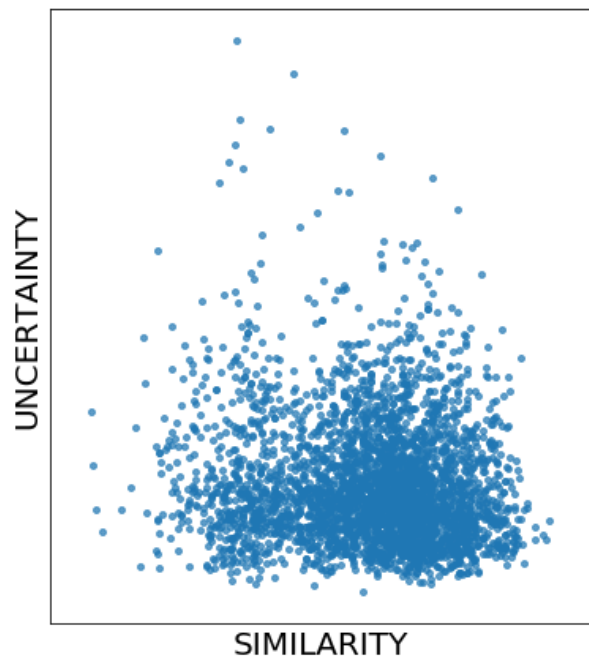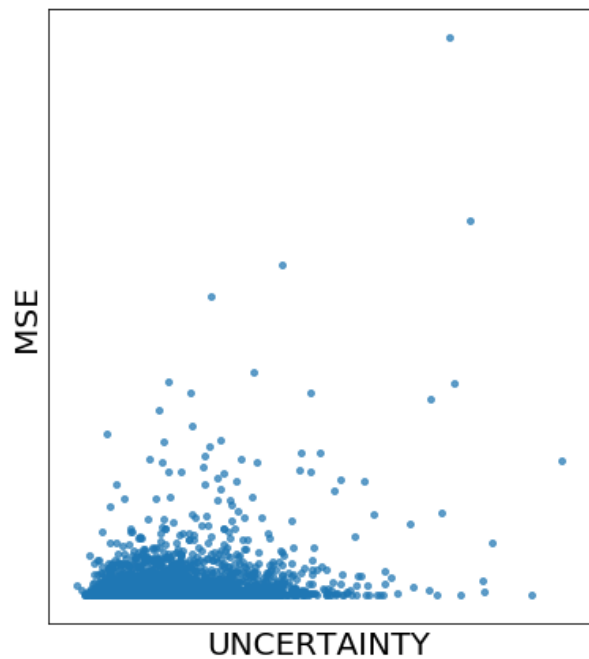

CV

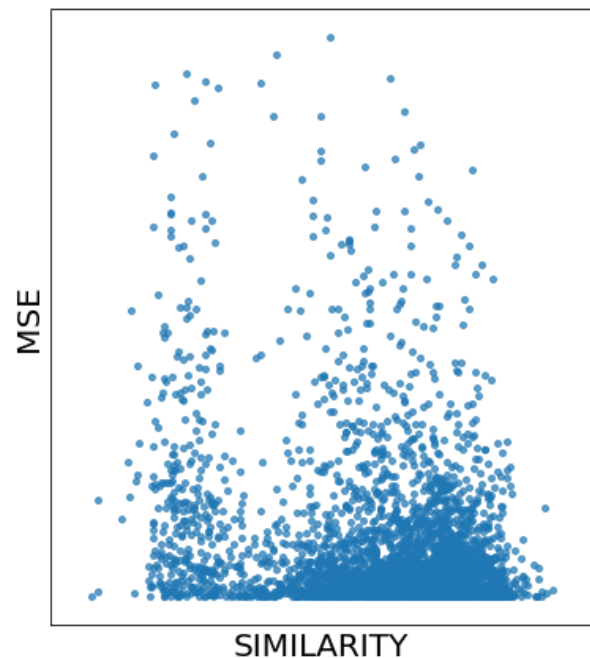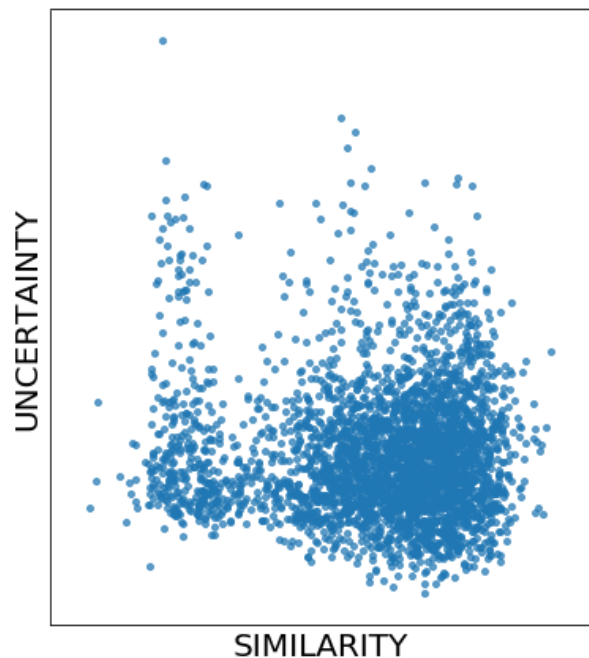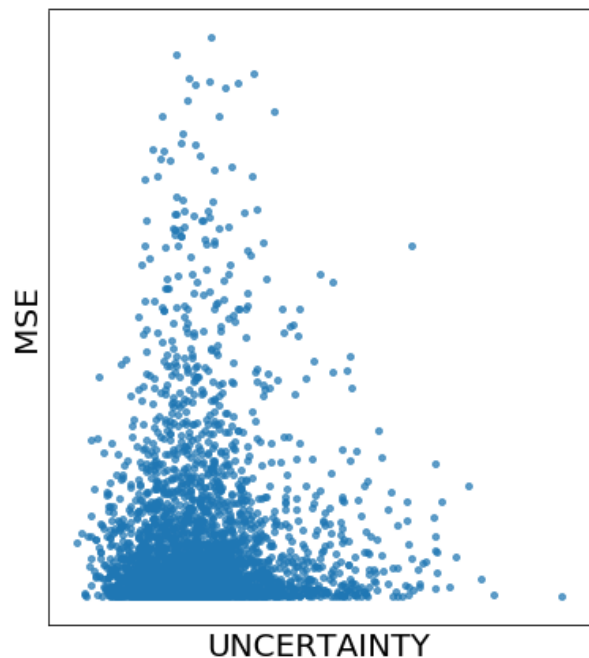

BAC

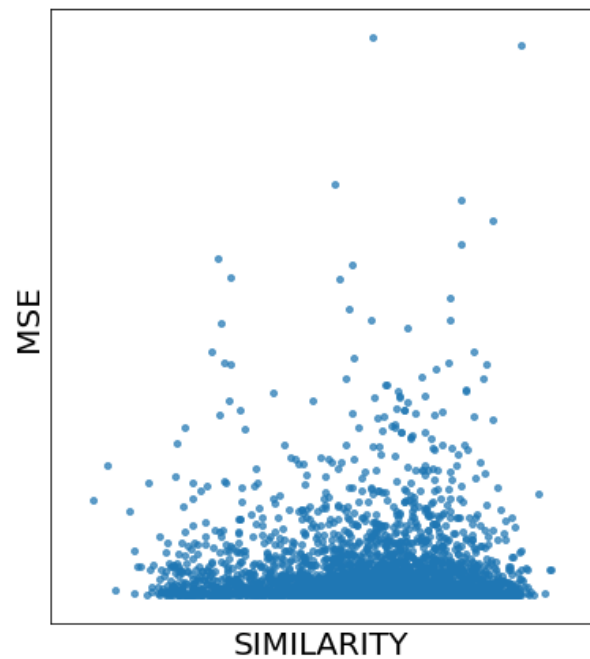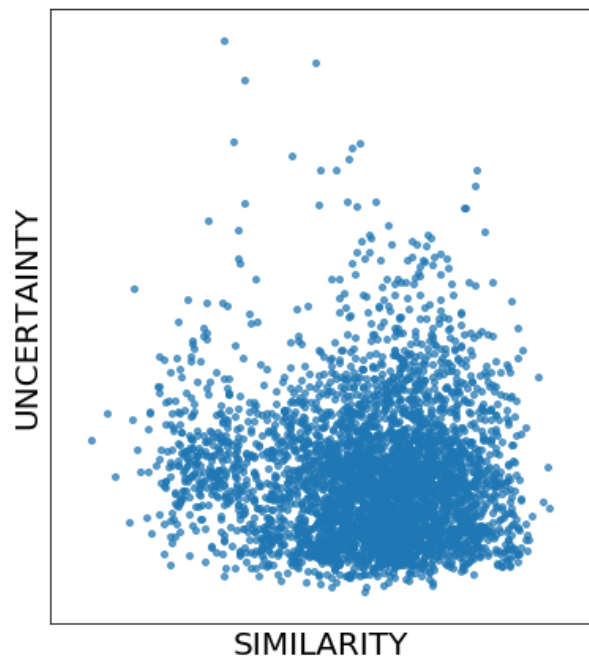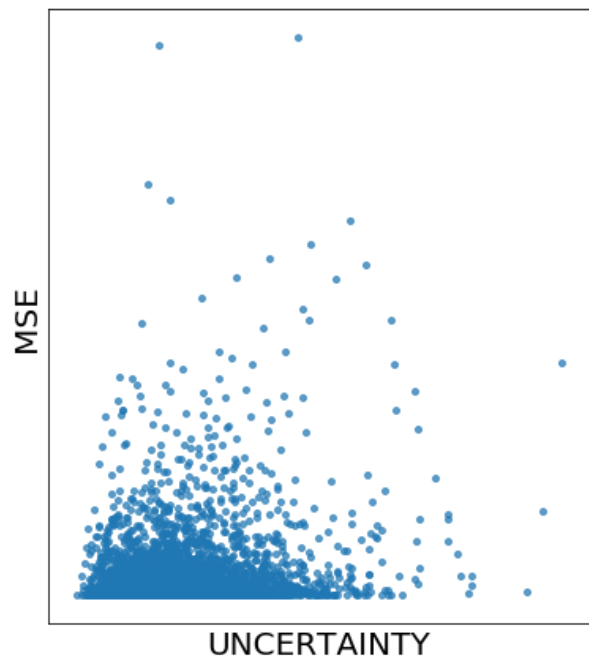

CV

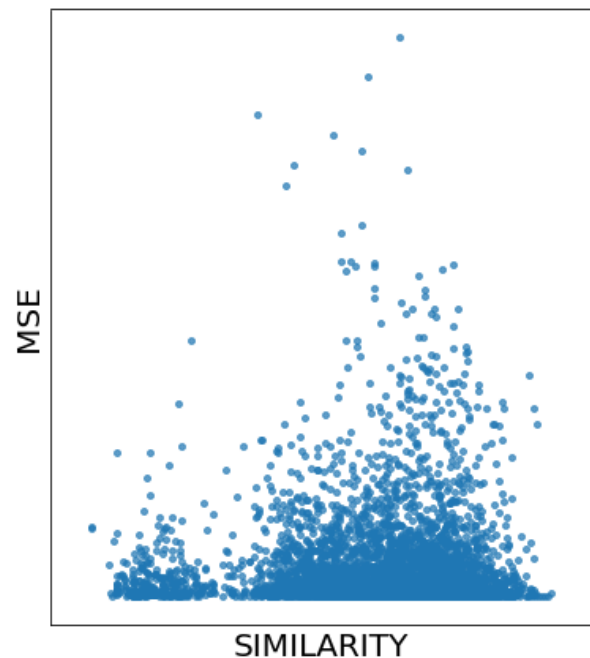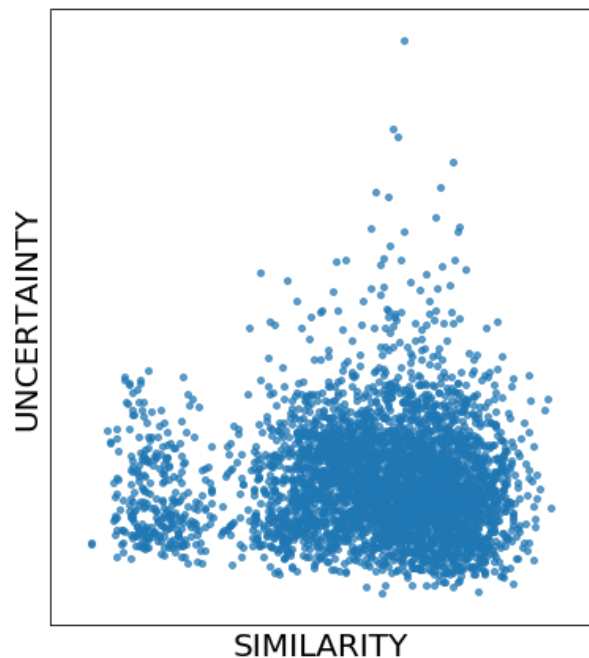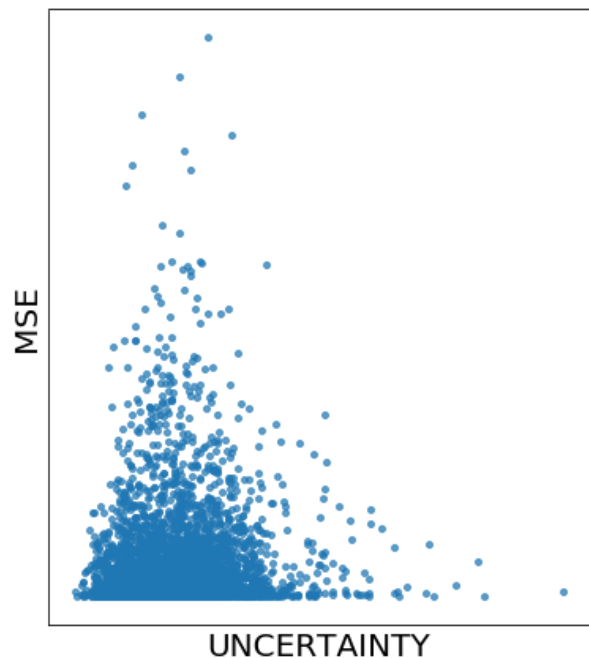

BAC

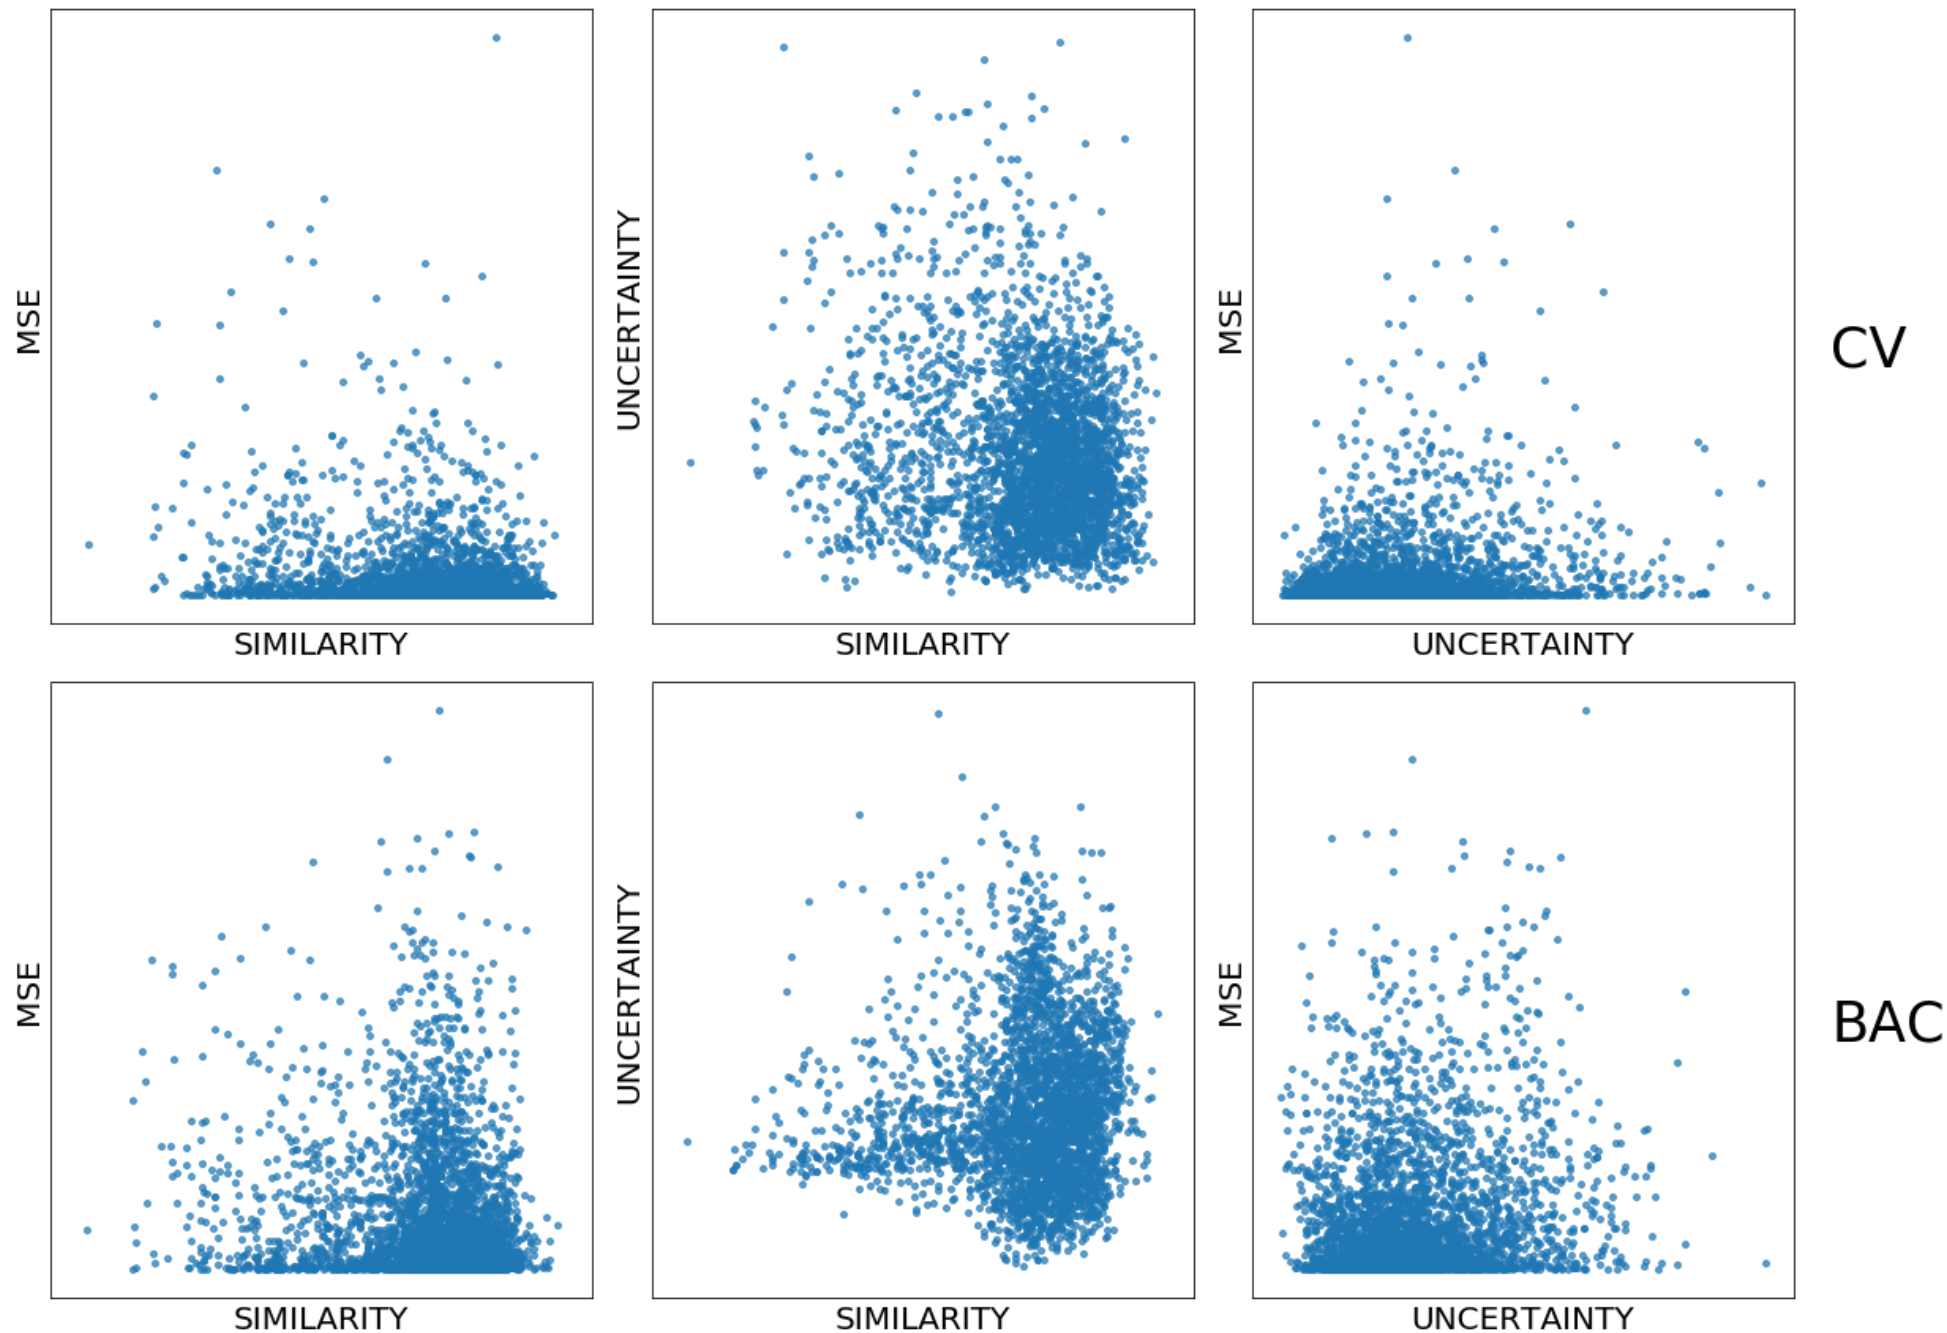



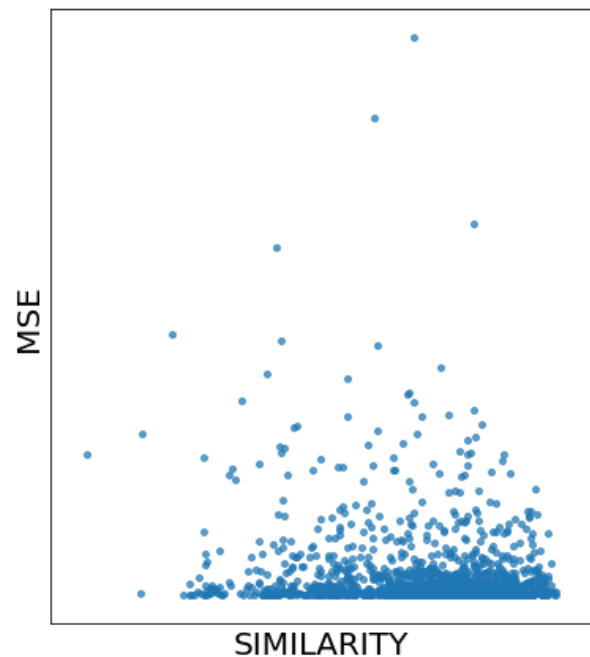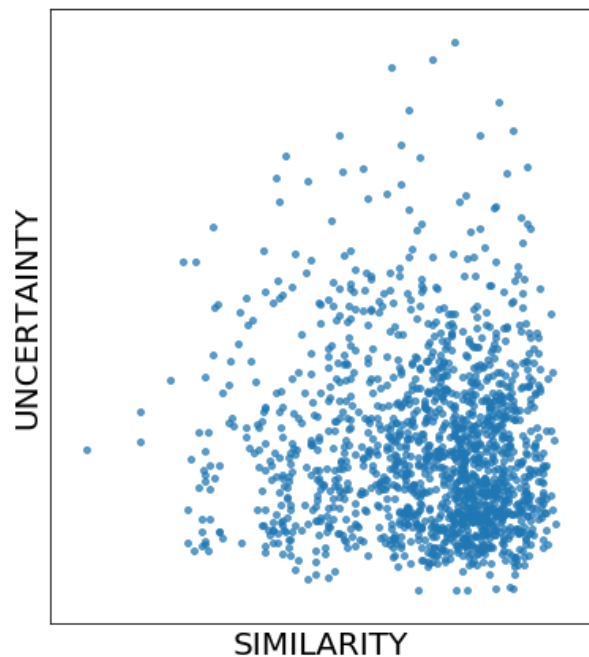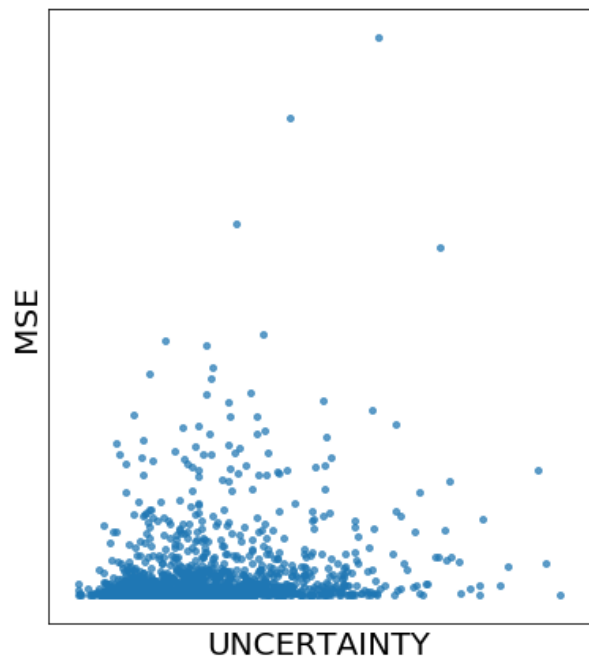

CV

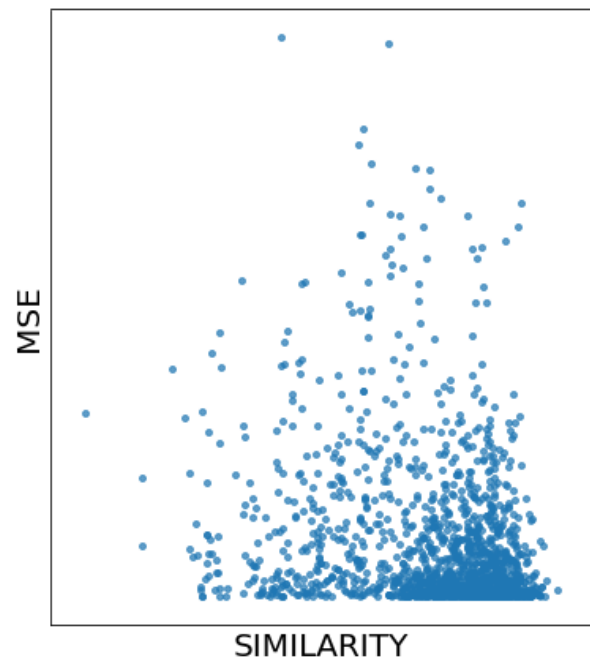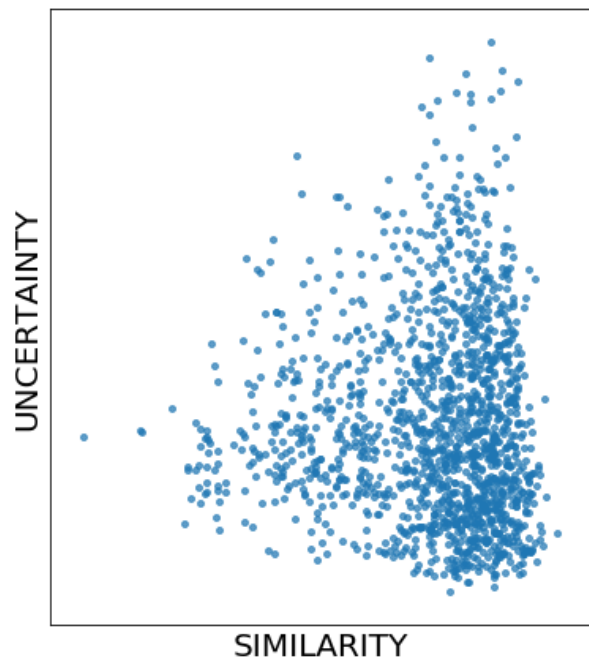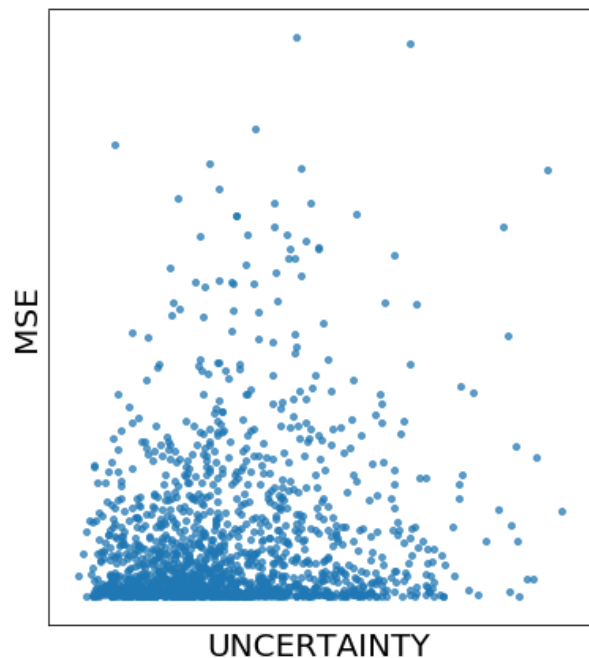

BAC

Morgan FP  
ChEMBL3371

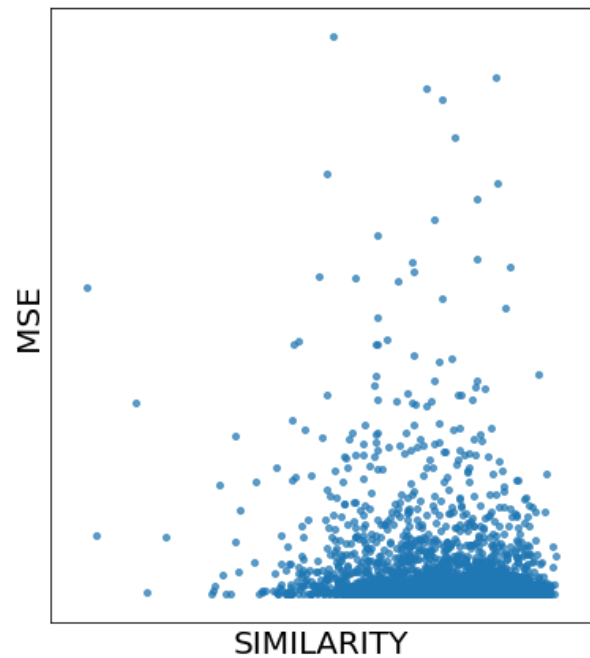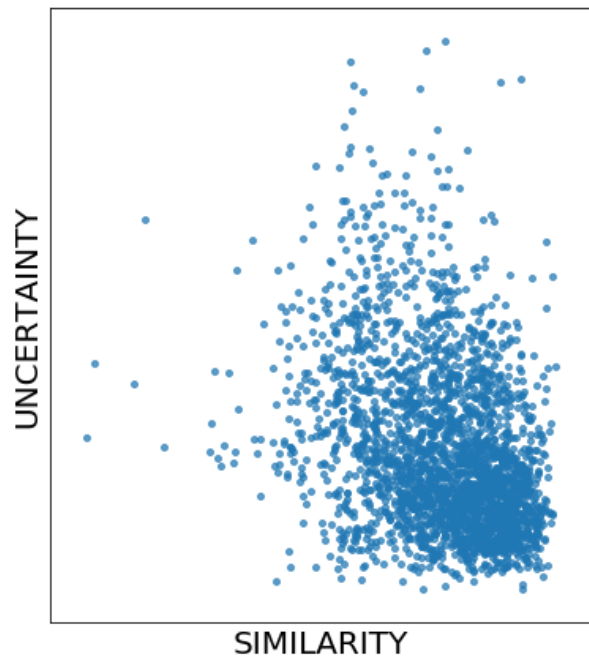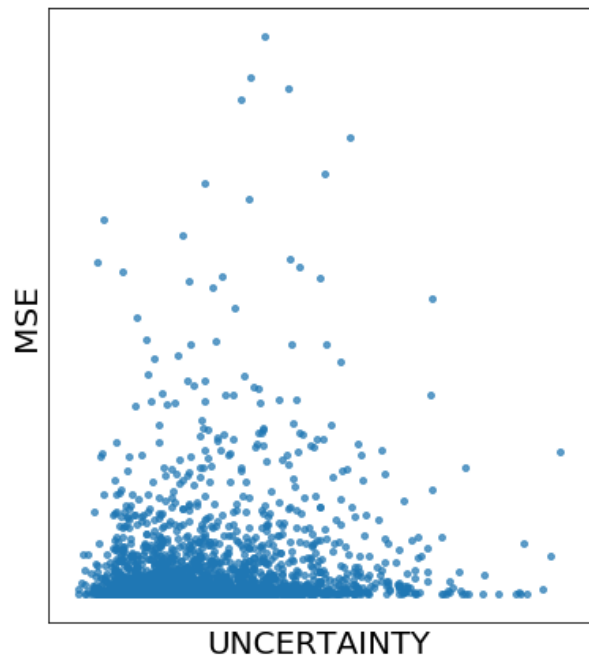

CV

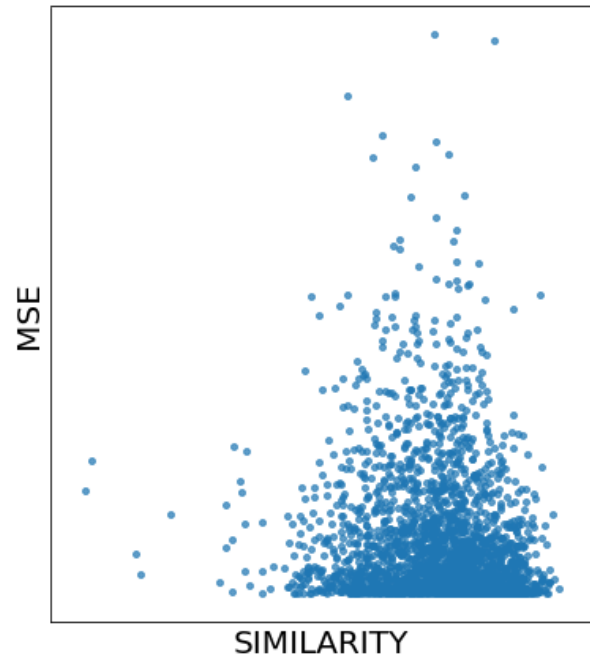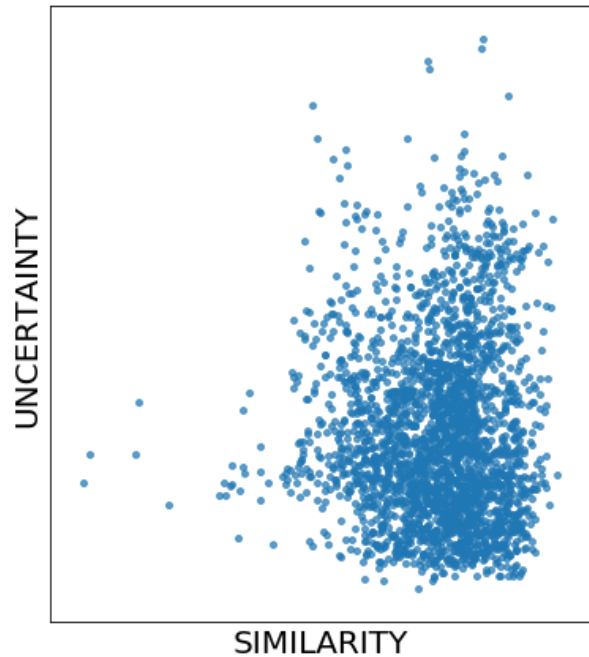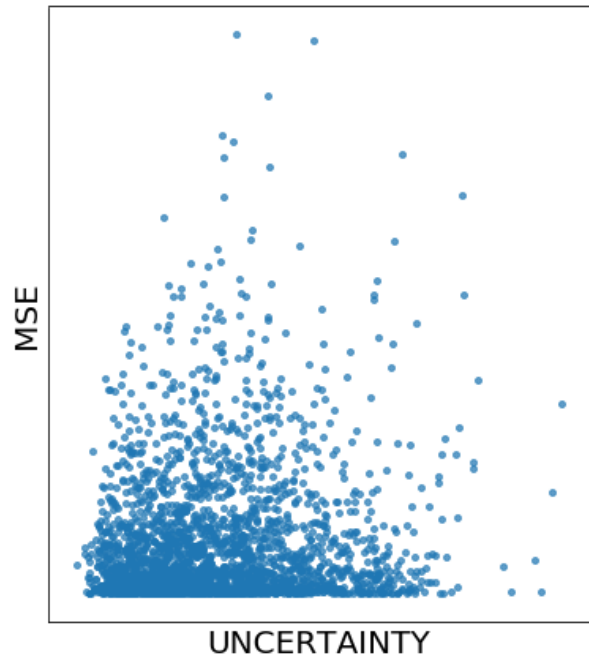

BAC

Morgan FP  
ChEMBL1945

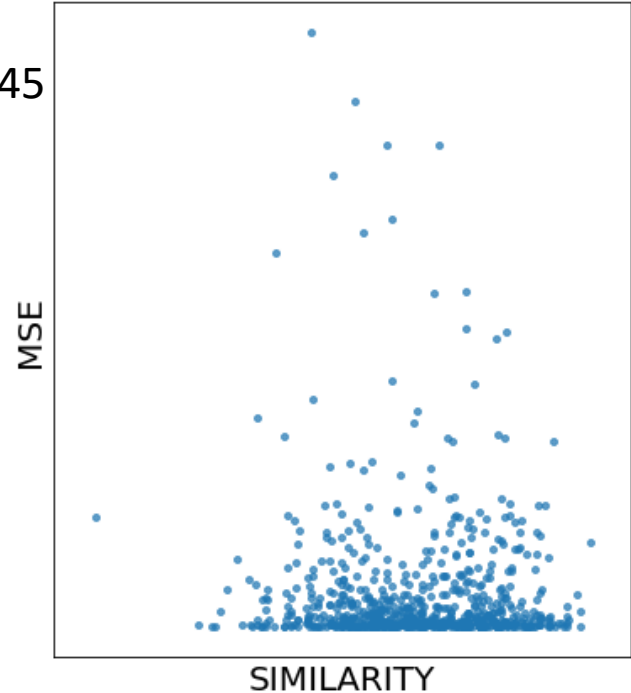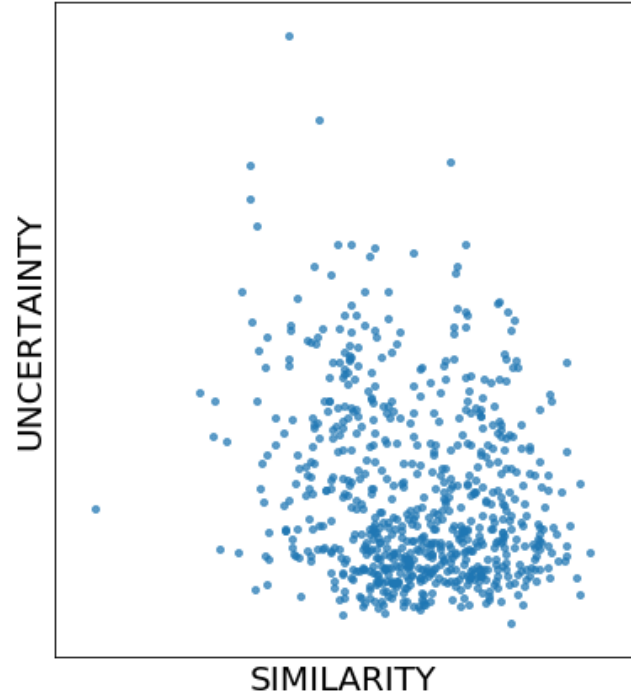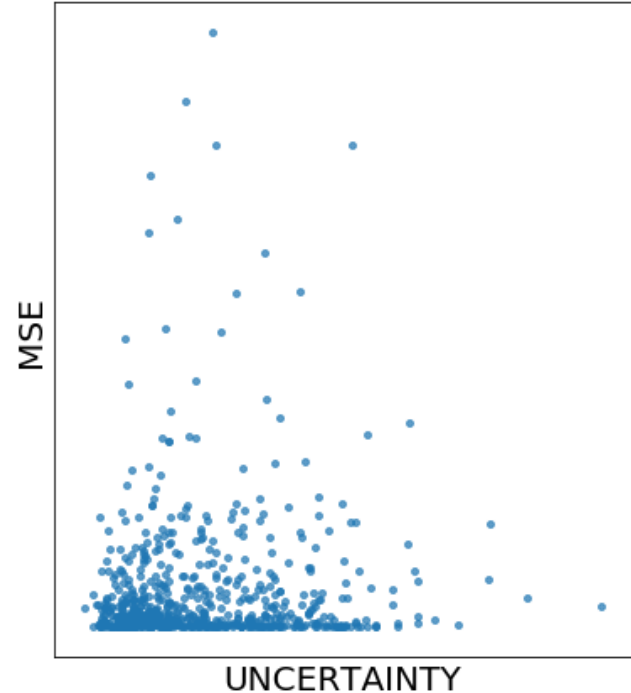

CV

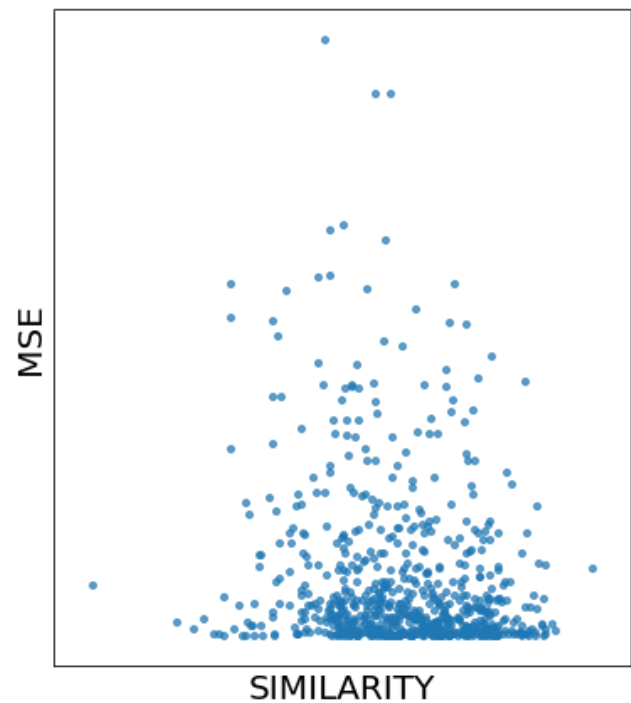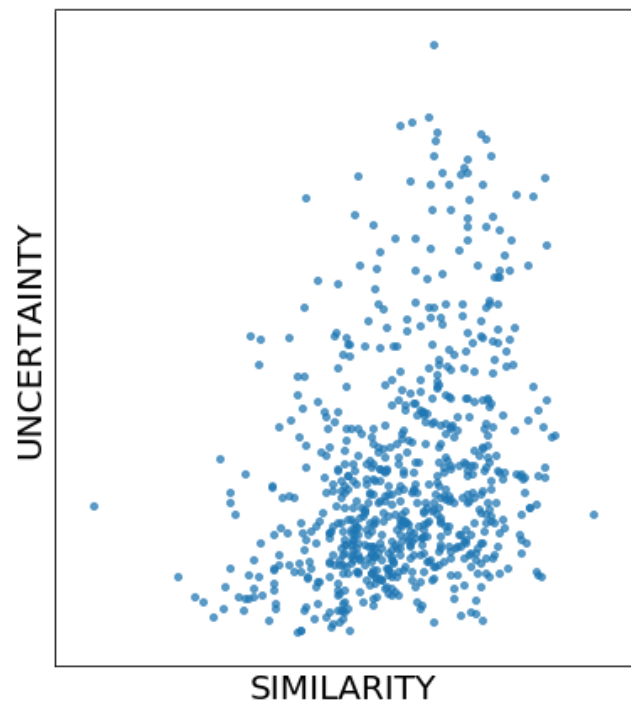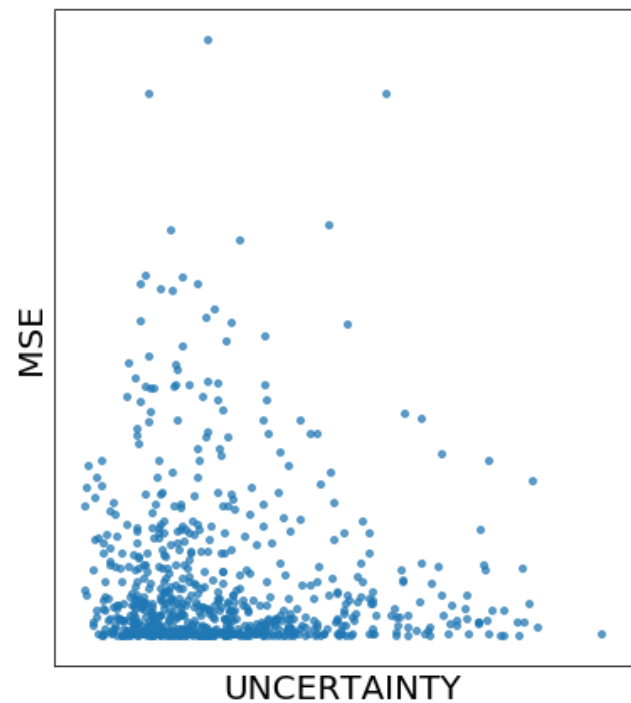

BAC

Morgan FP  
ChEMBL1946

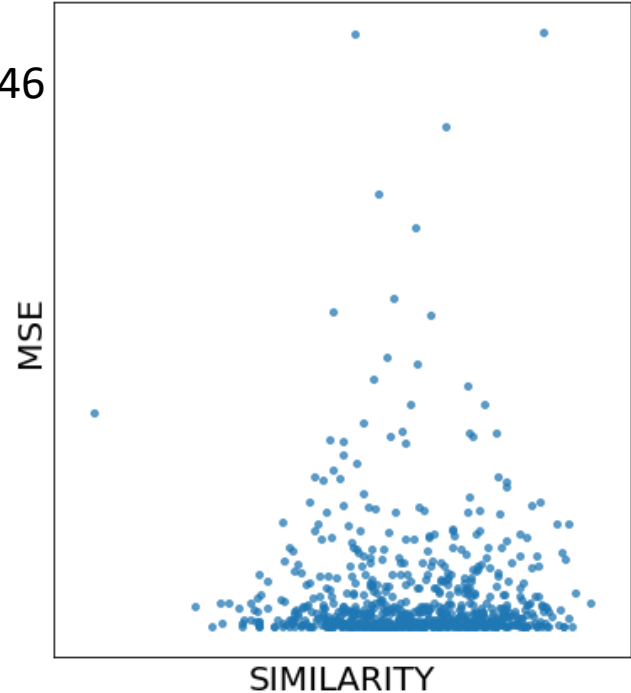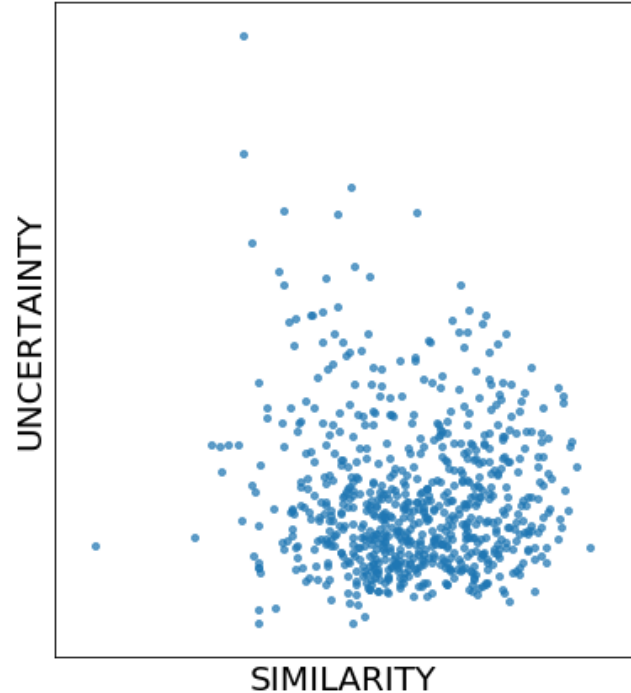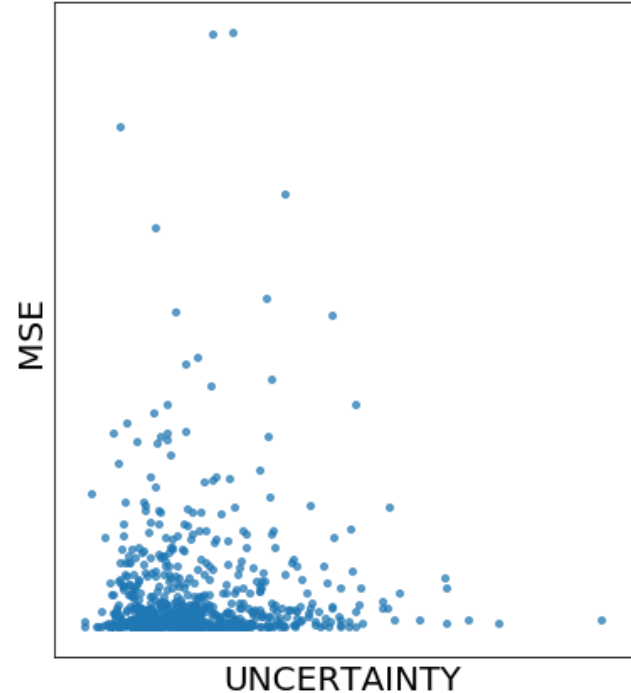

CV

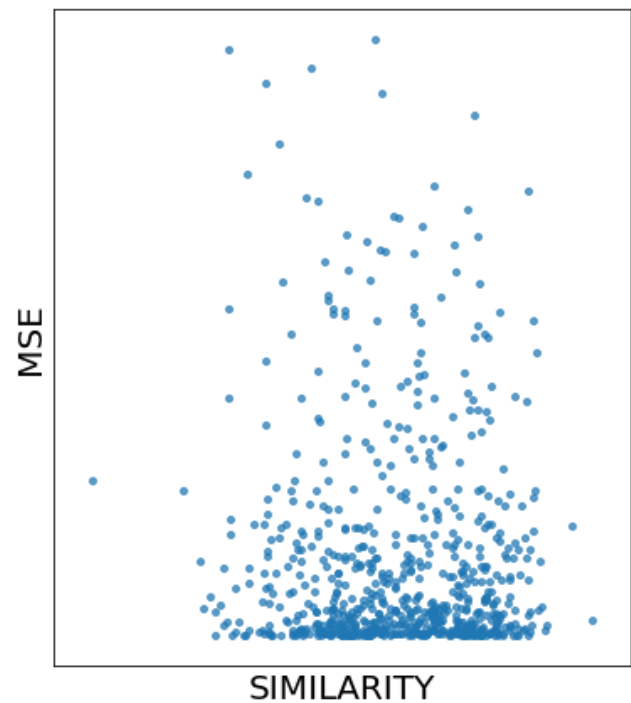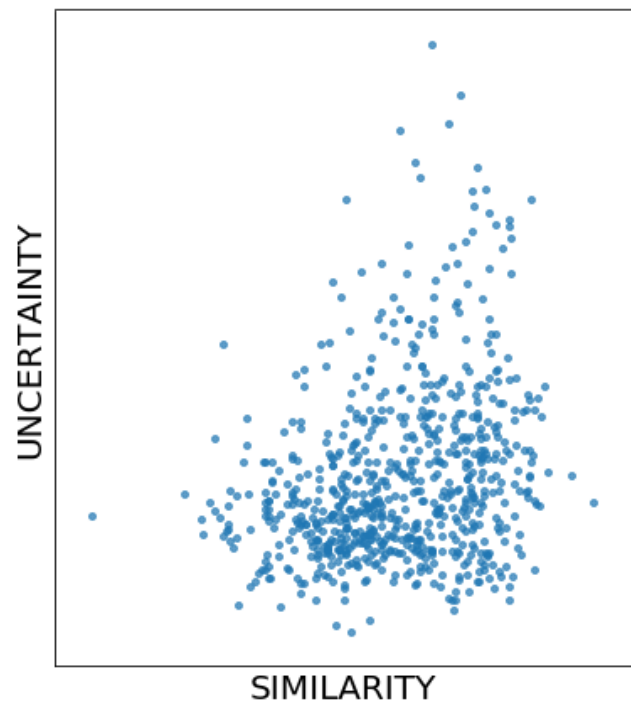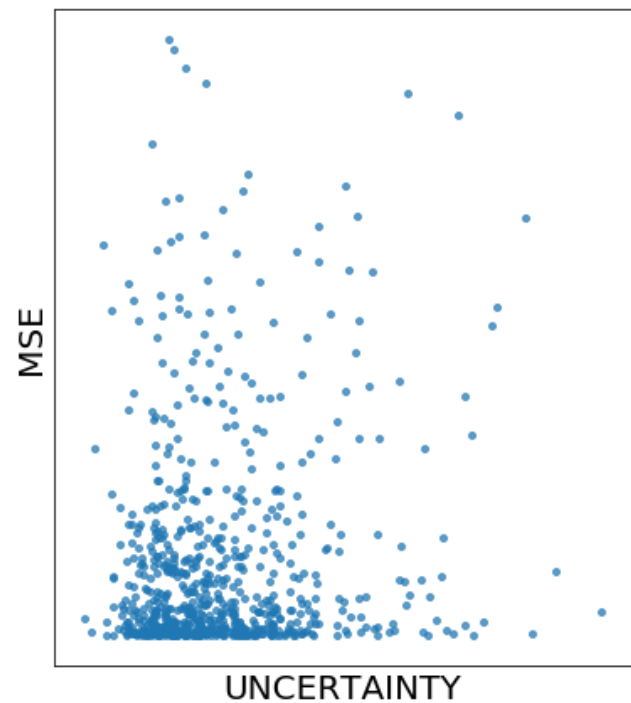

BAC

Morgan FP  
ChEMBL218

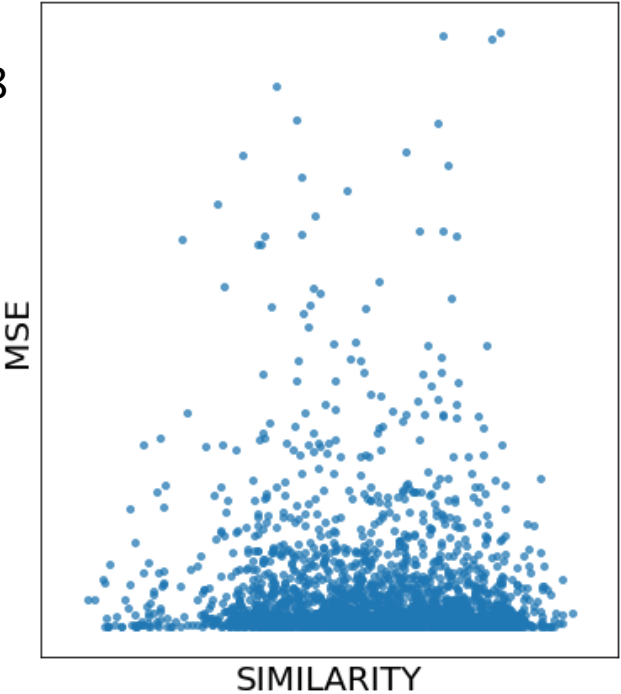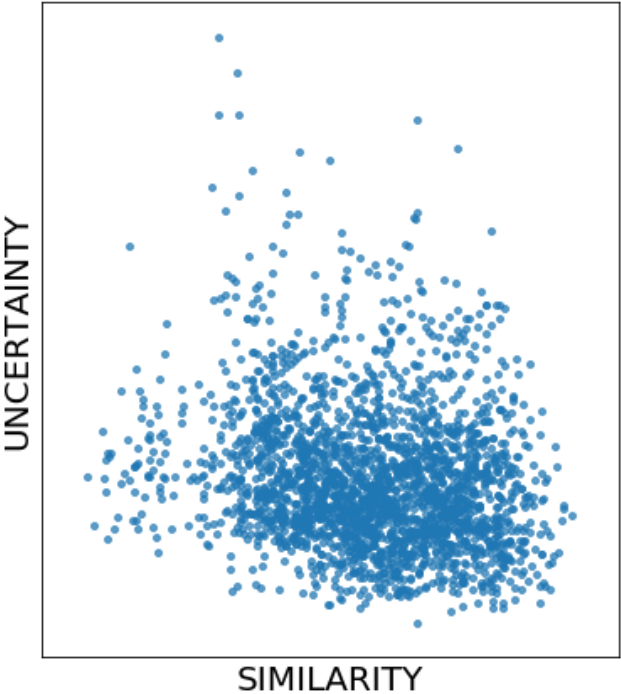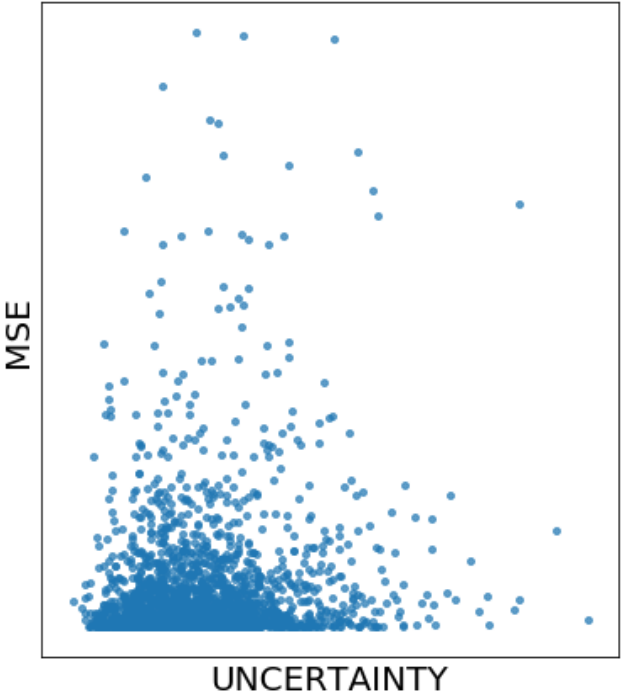

CV

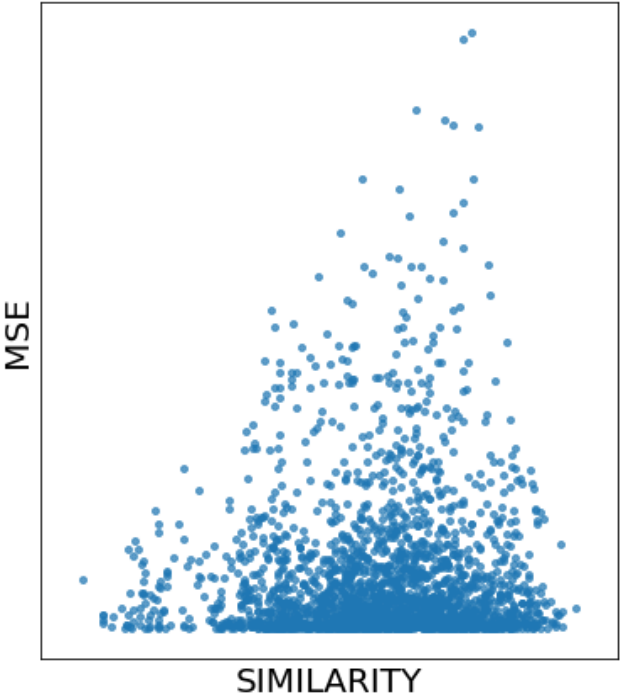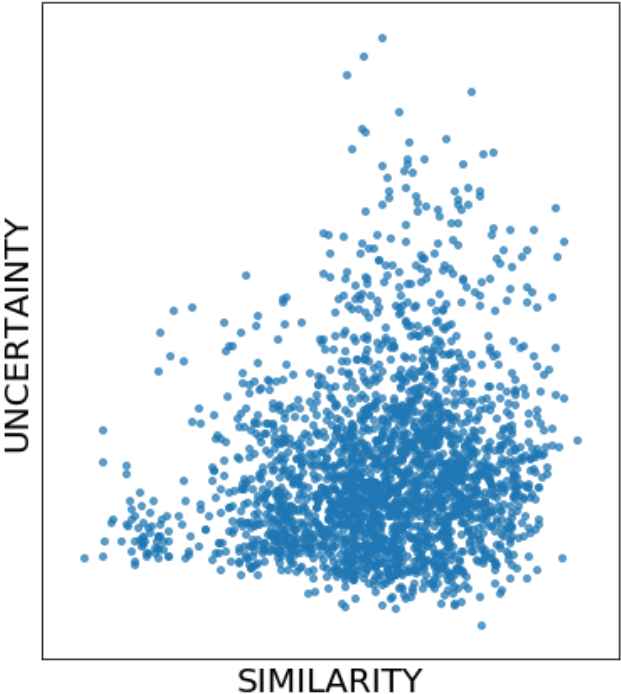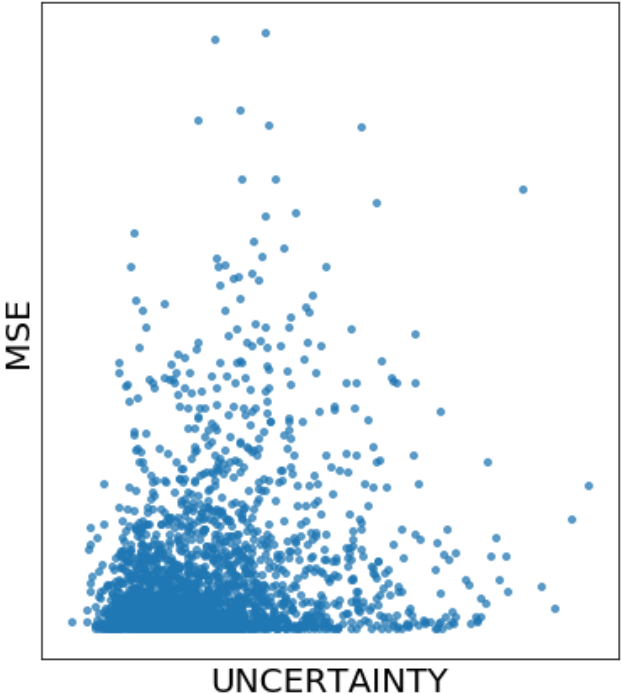

BAC



Morgan FP  
CHEMBL233

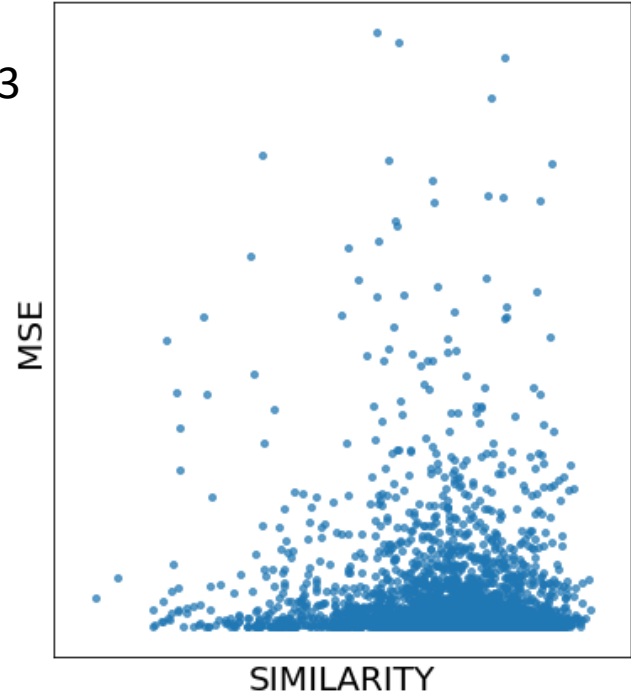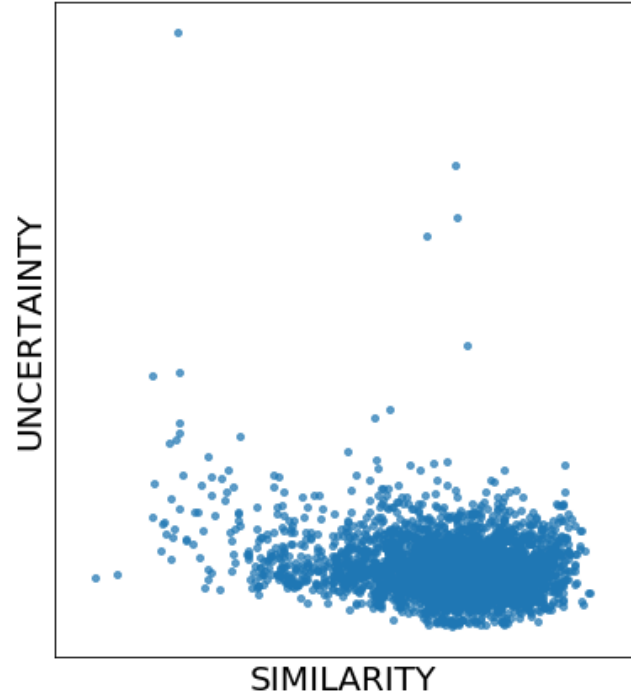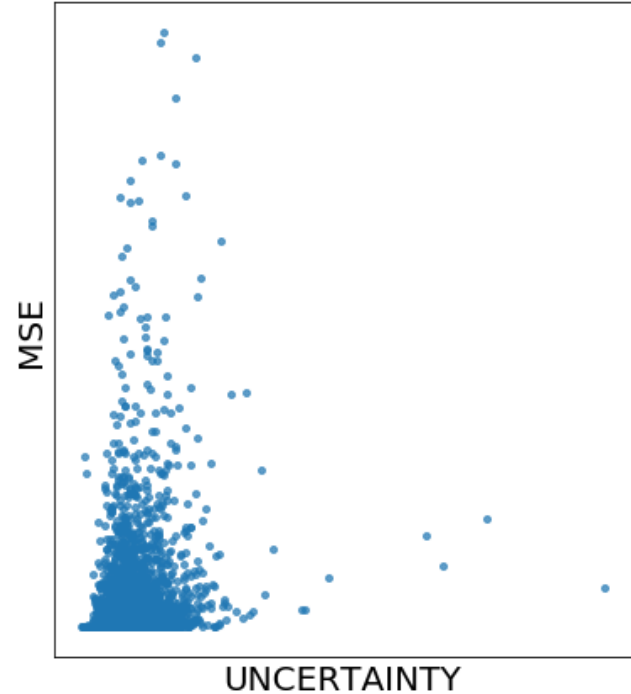

CV

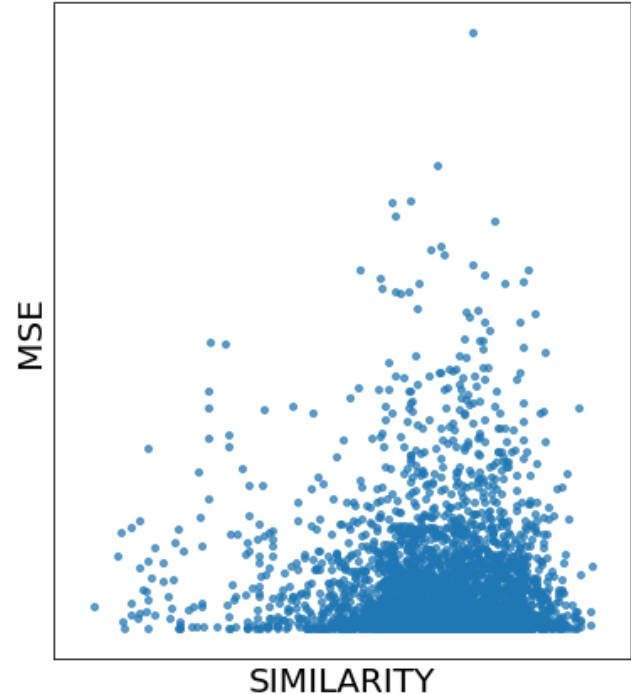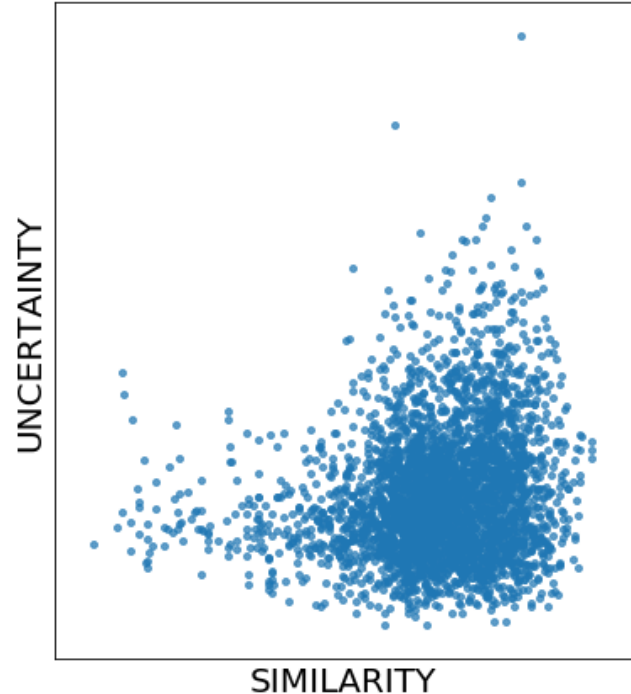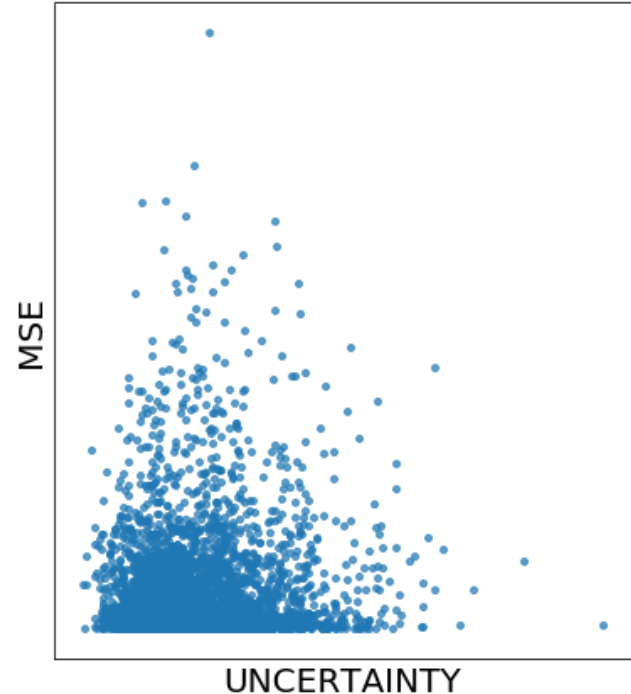

BAC

Morgan FP  
ChEMBL236

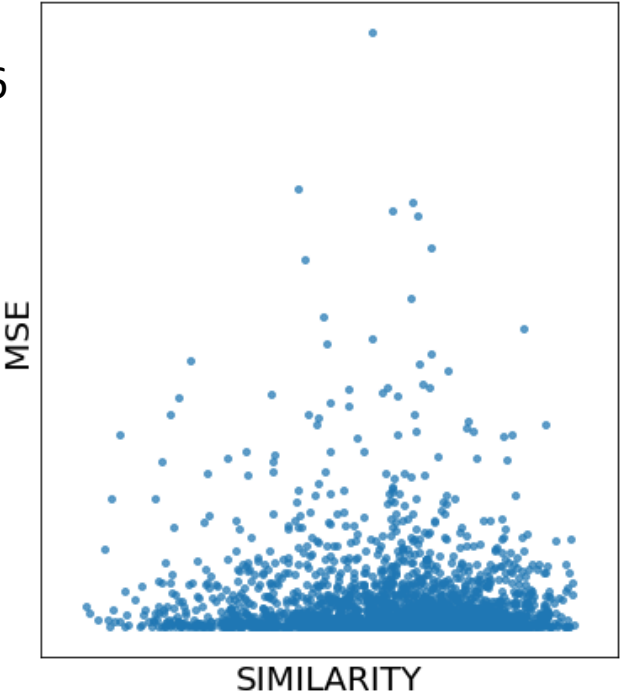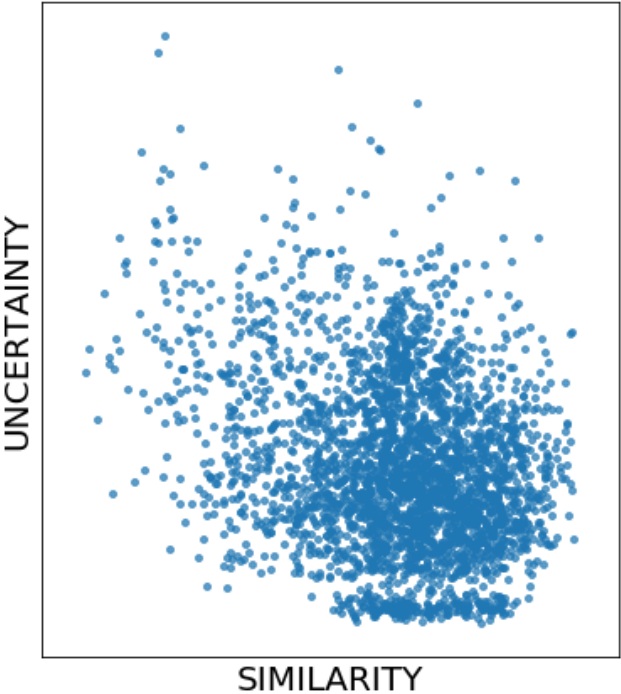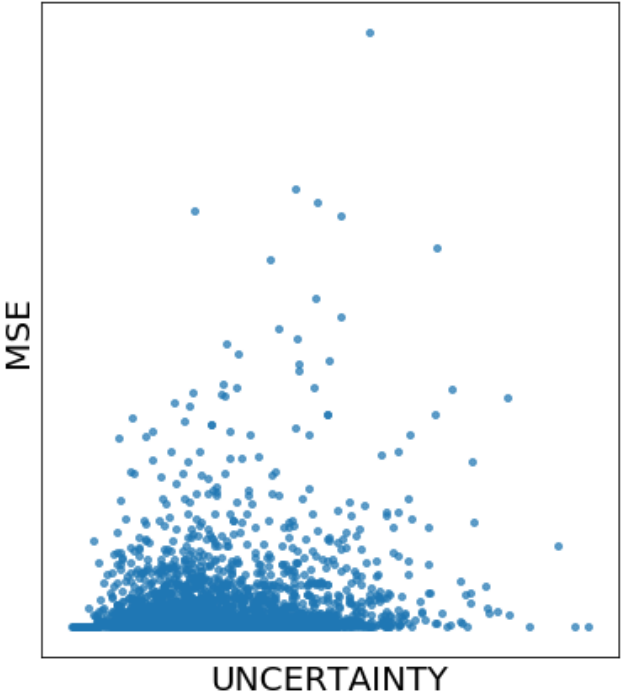

CV

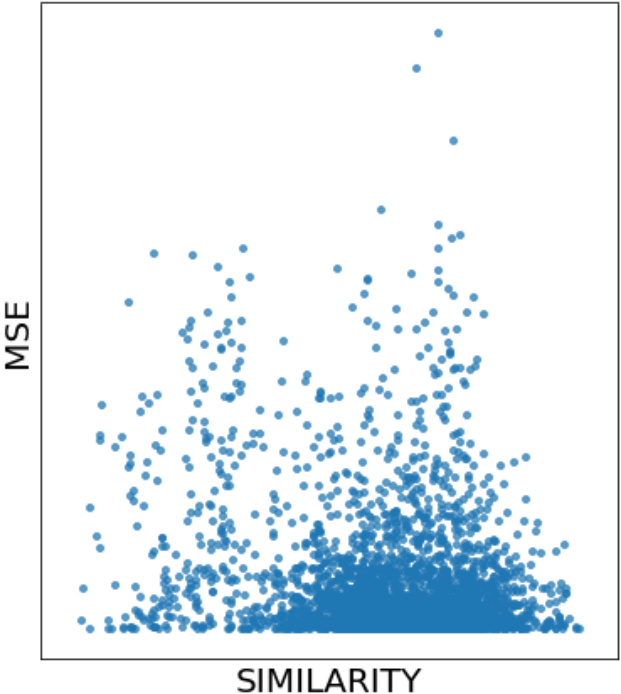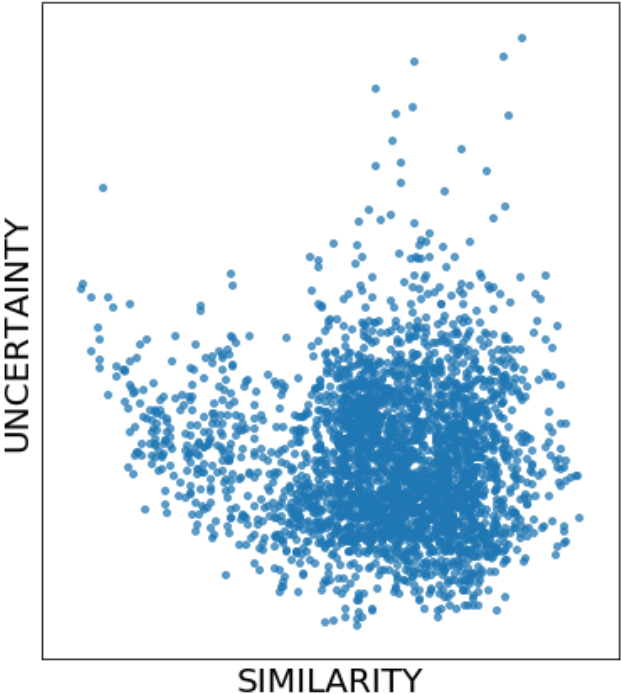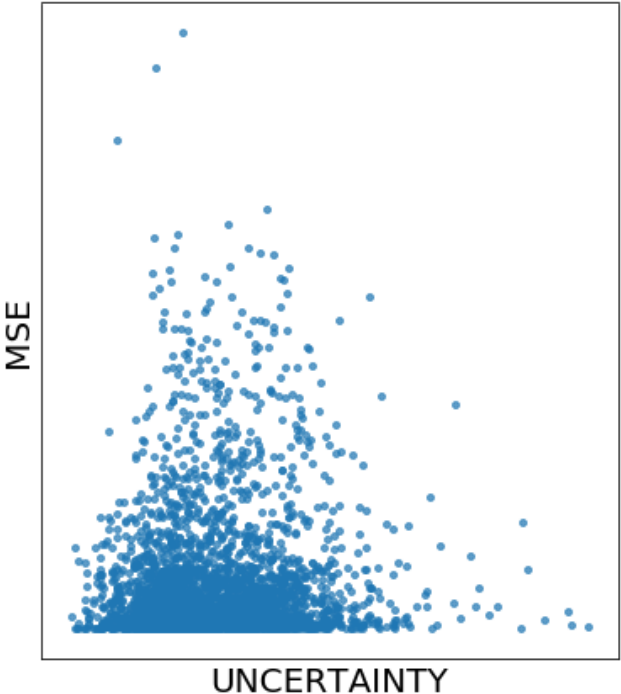

BAC

Morgan FP  
ChEMBL237

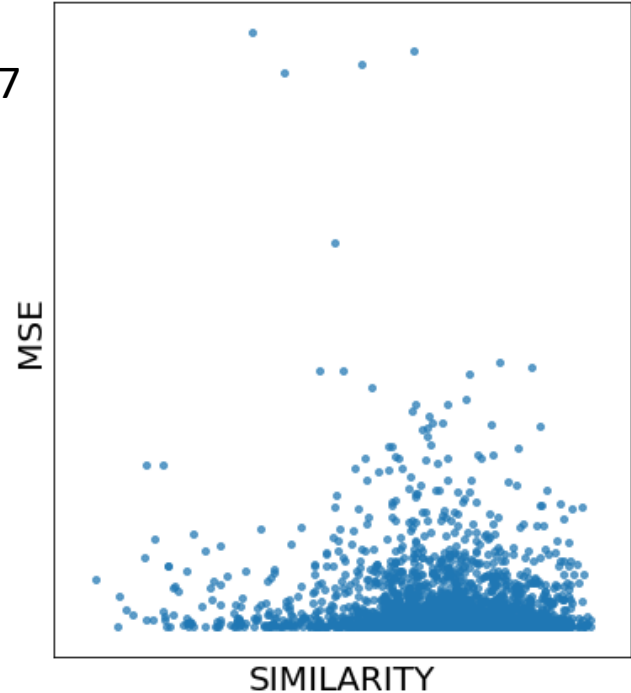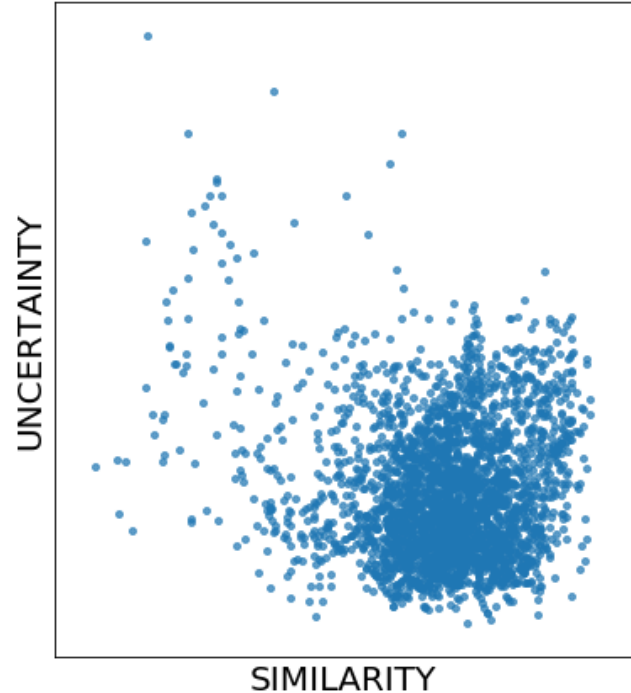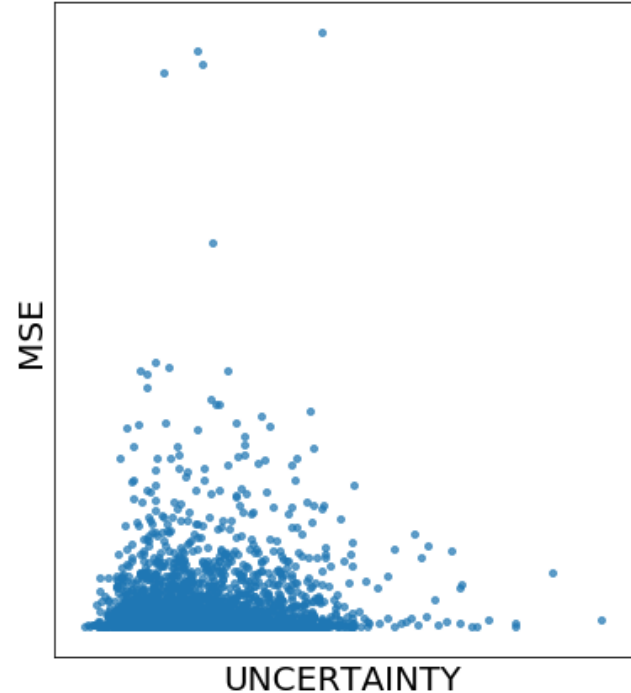

CV

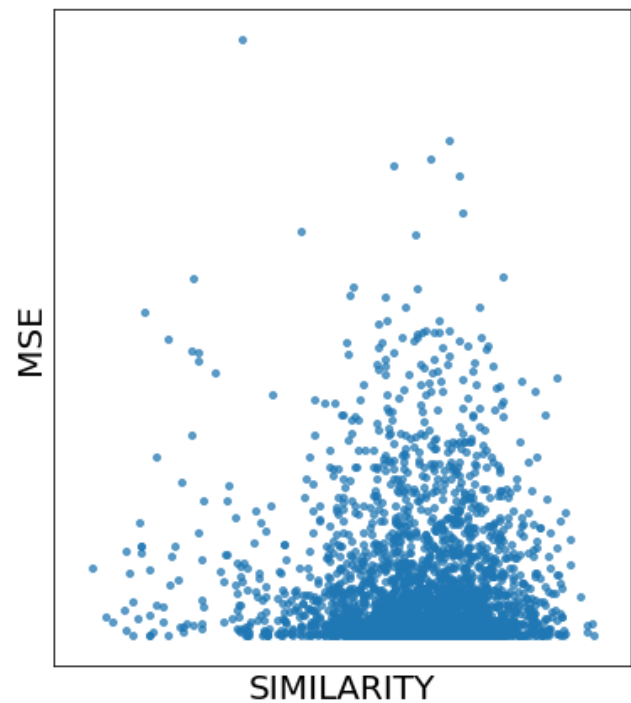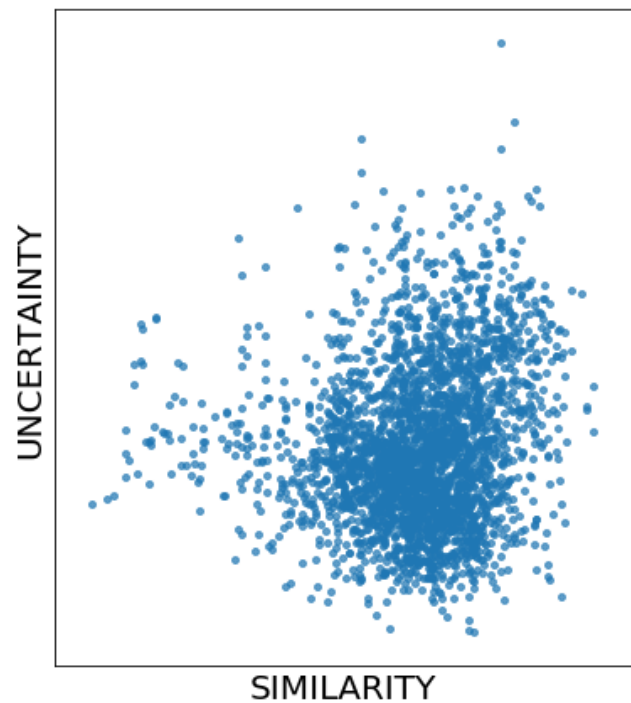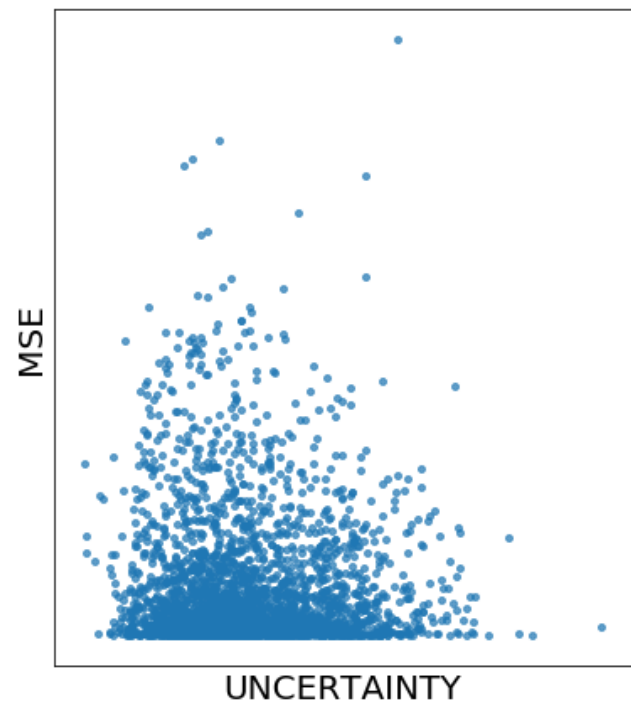

BAC

Morgan FP  
ChEMBL253

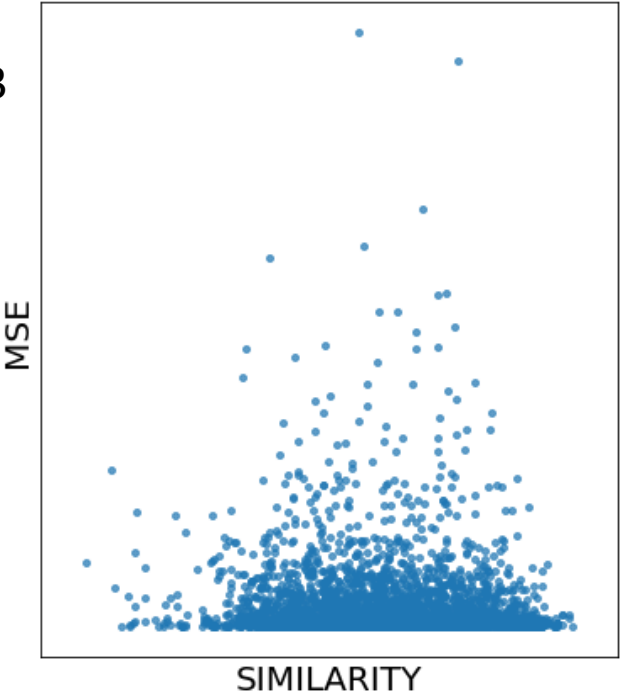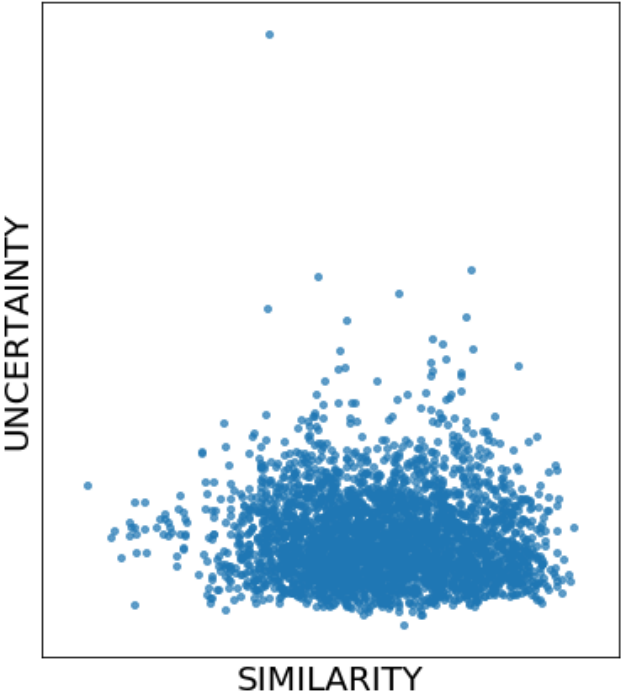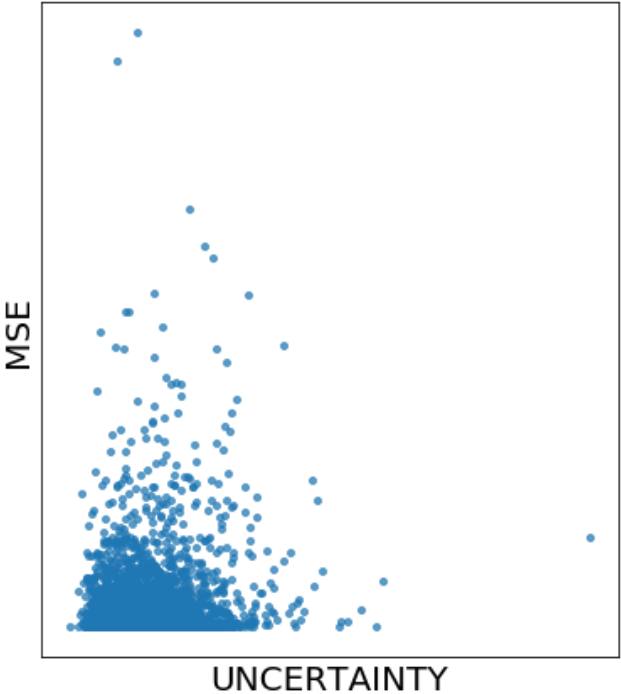

CV

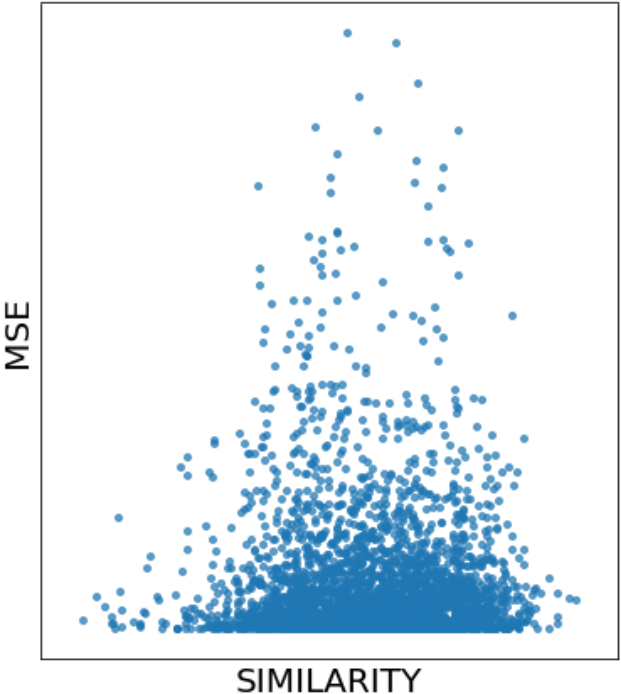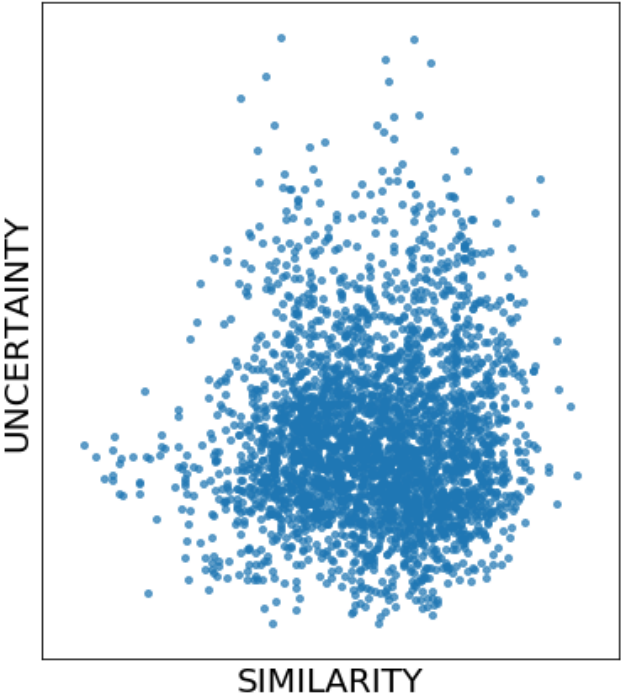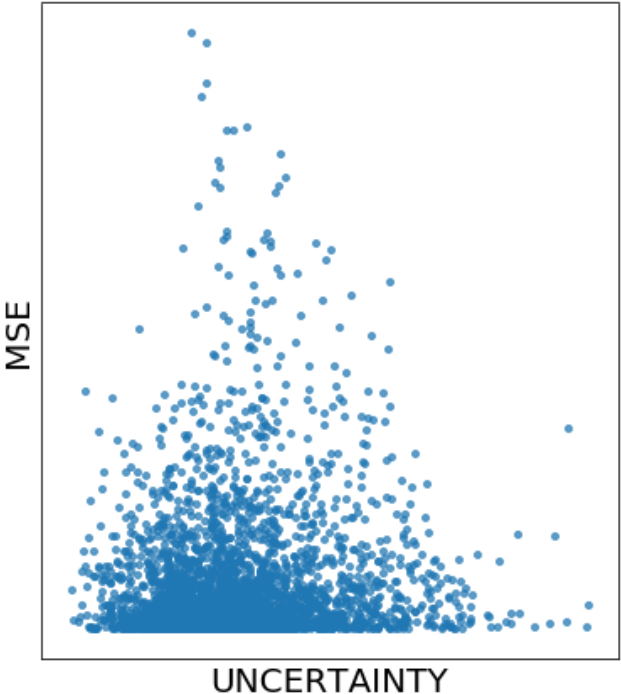

BAC

Morgan FP  
ChEMBL259

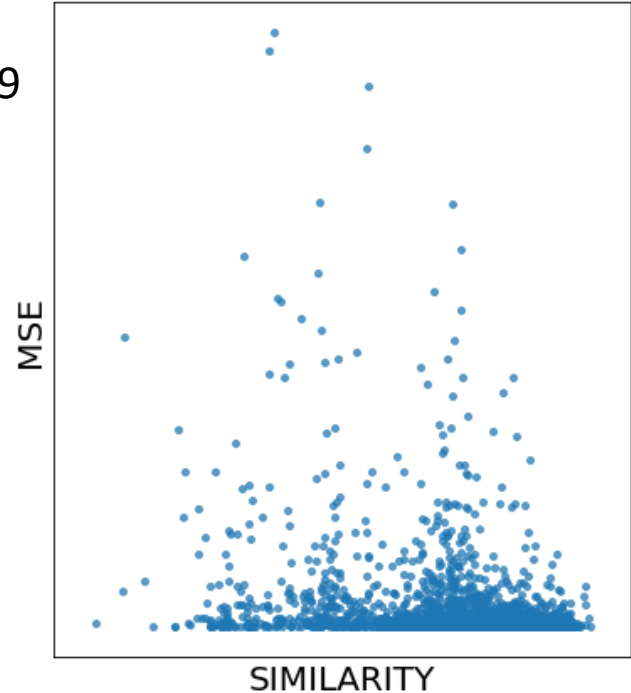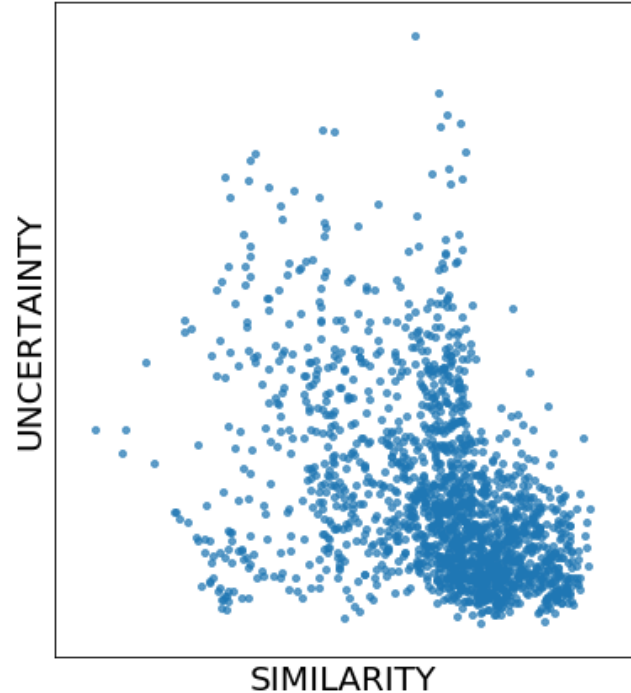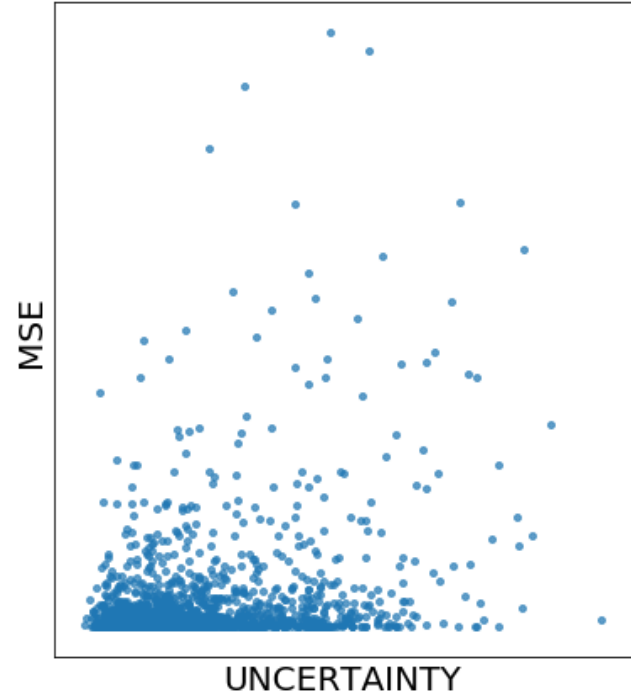

CV

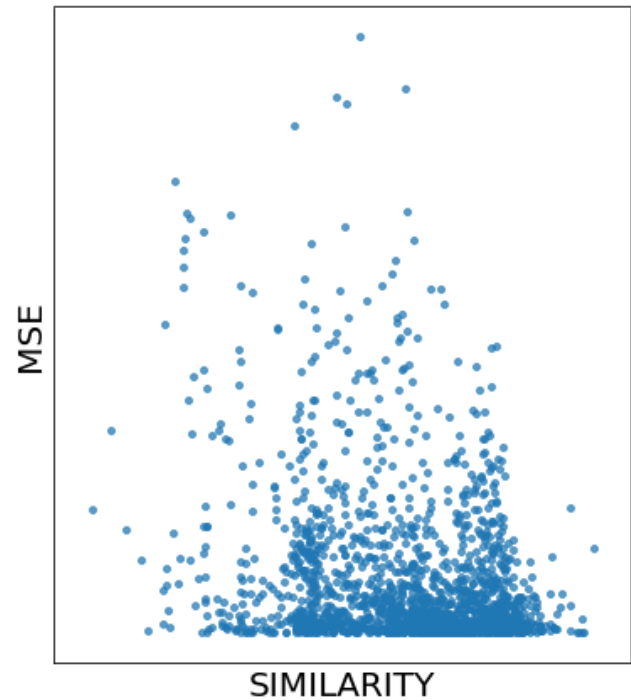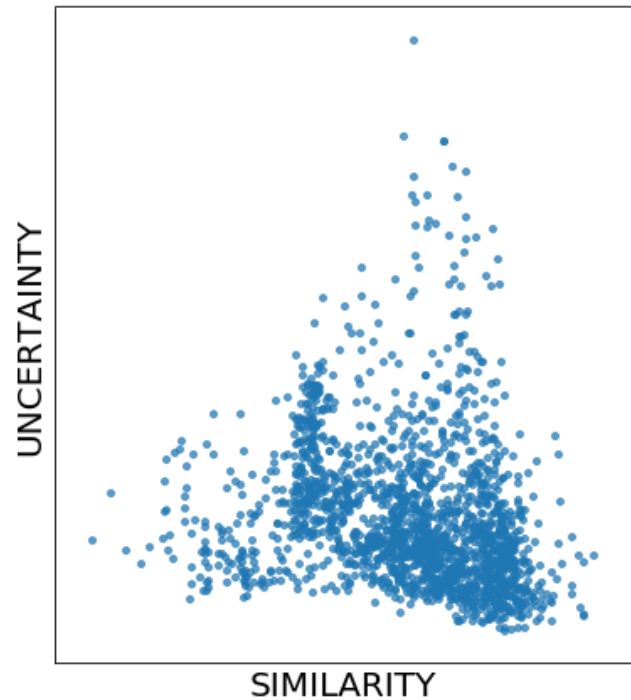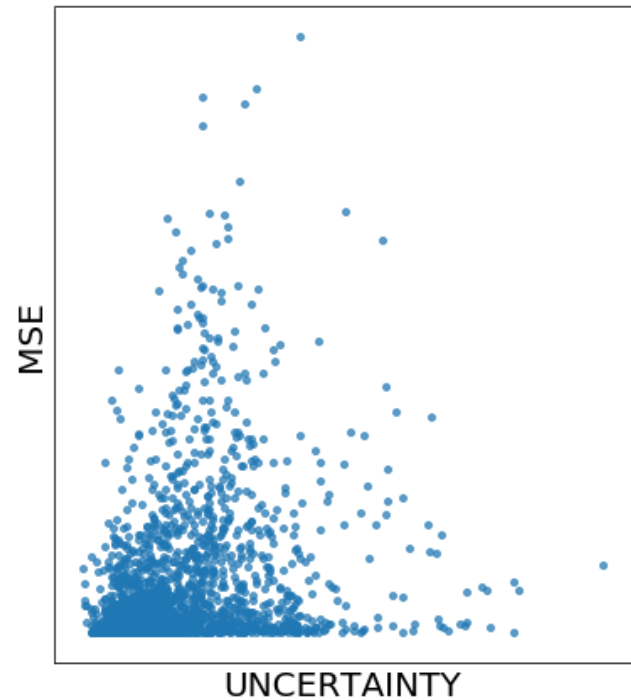

BAC



Morgan FP  
ChEMBL3227

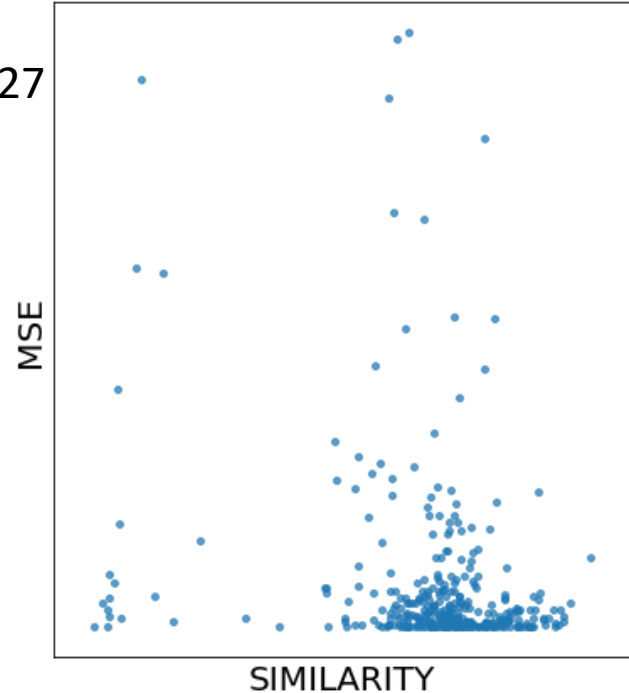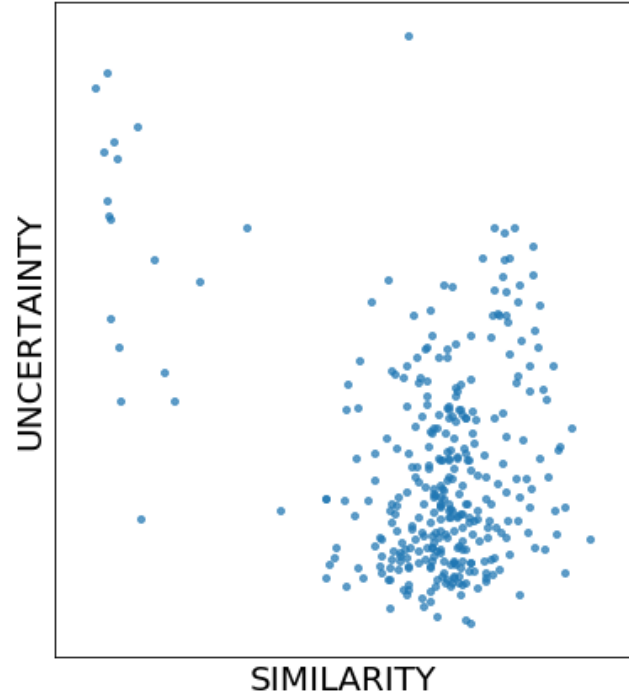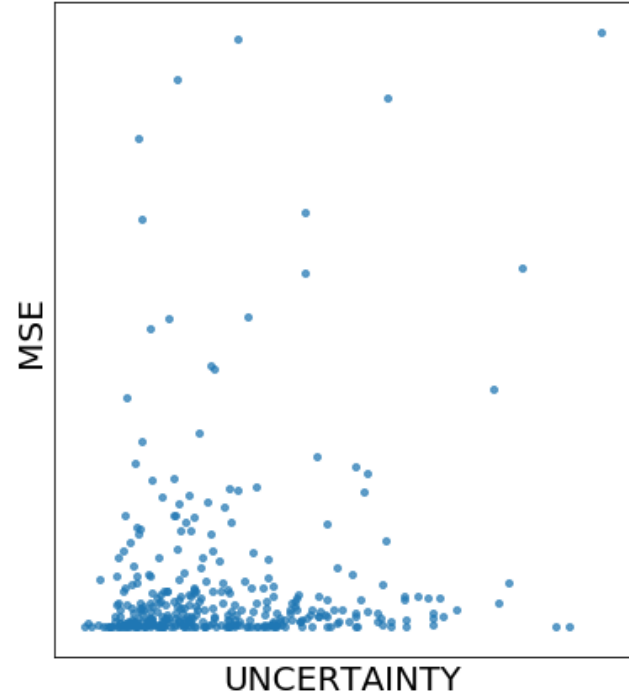

CV

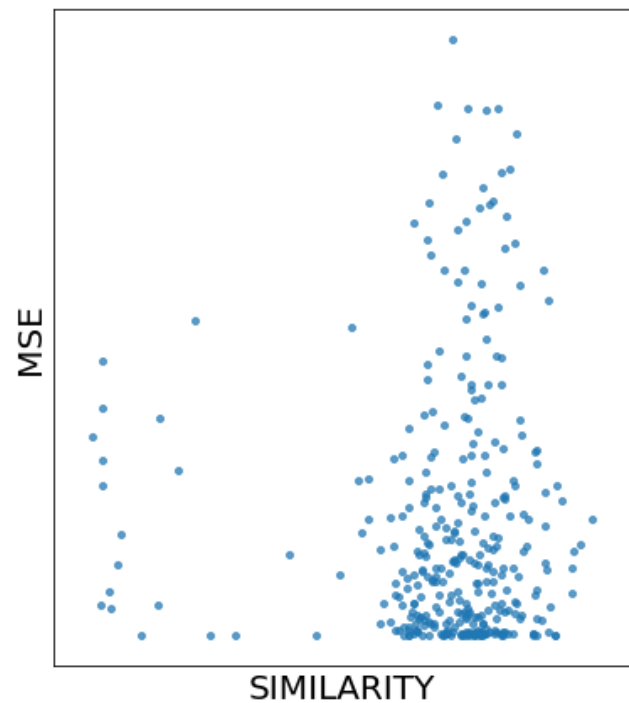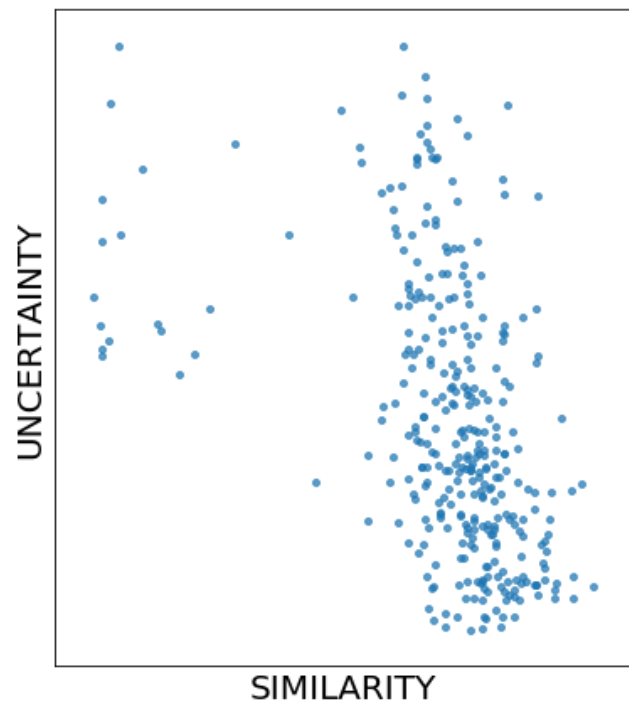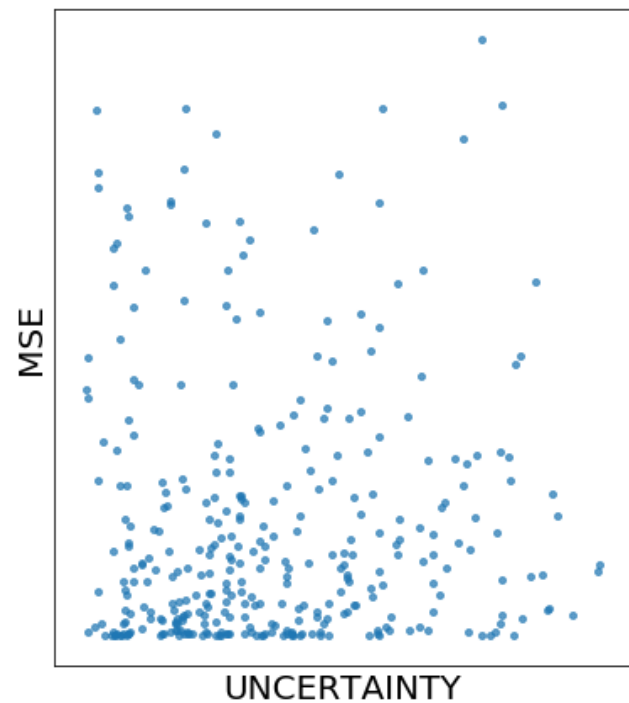

BAC

Morgan FP  
ChEMBL4015

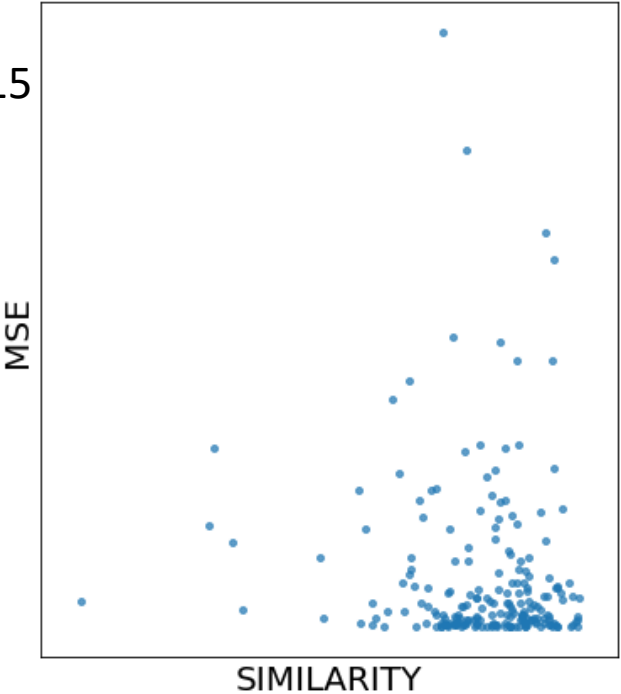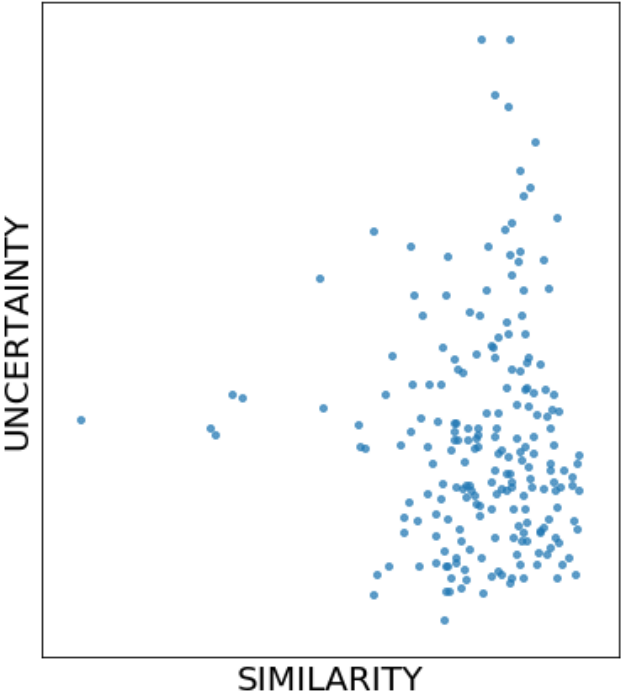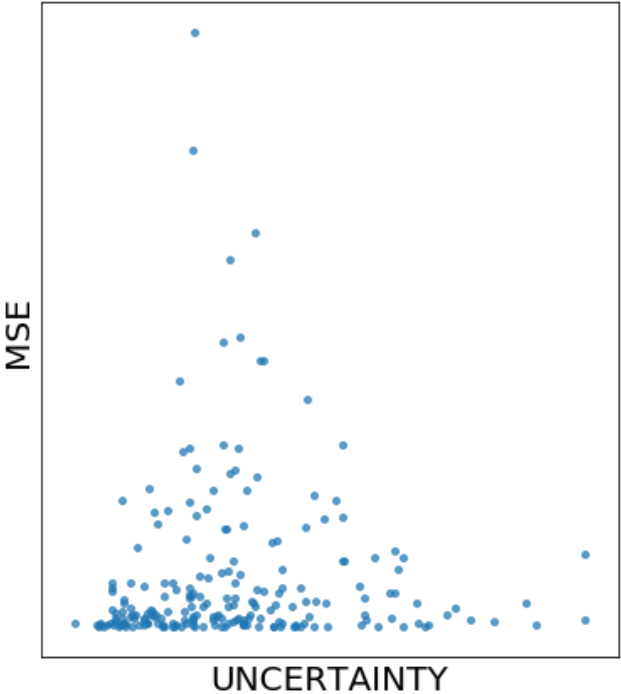

CV

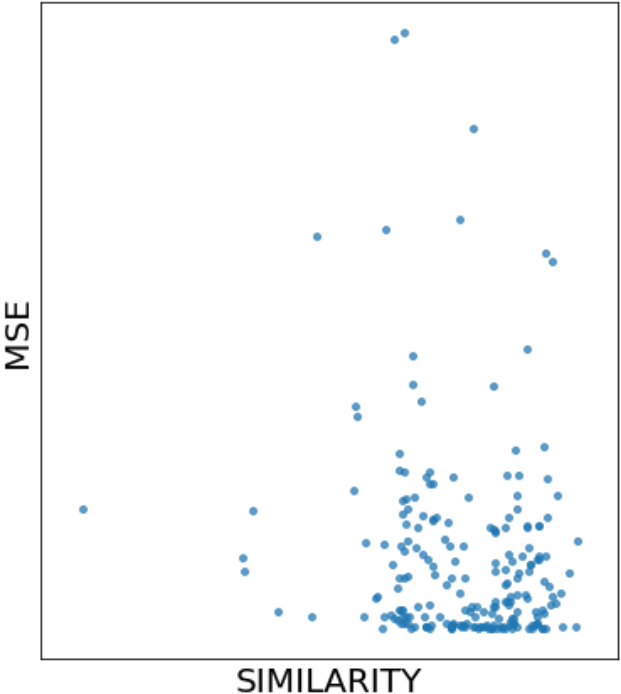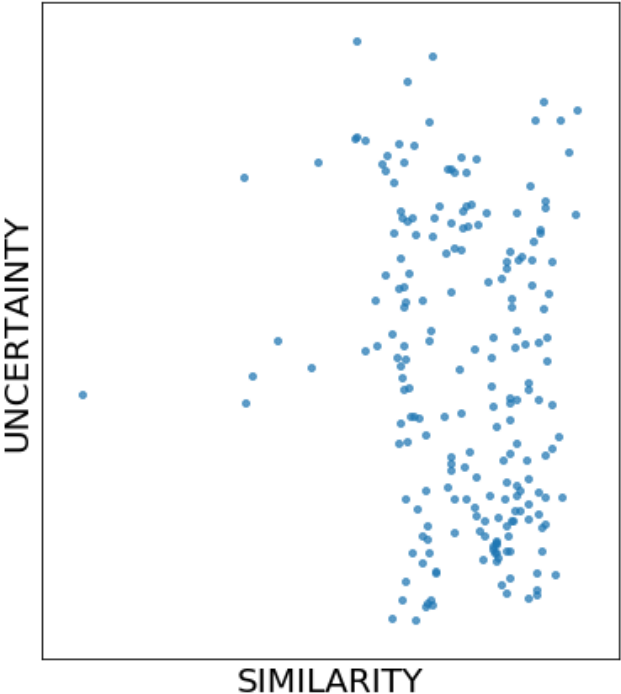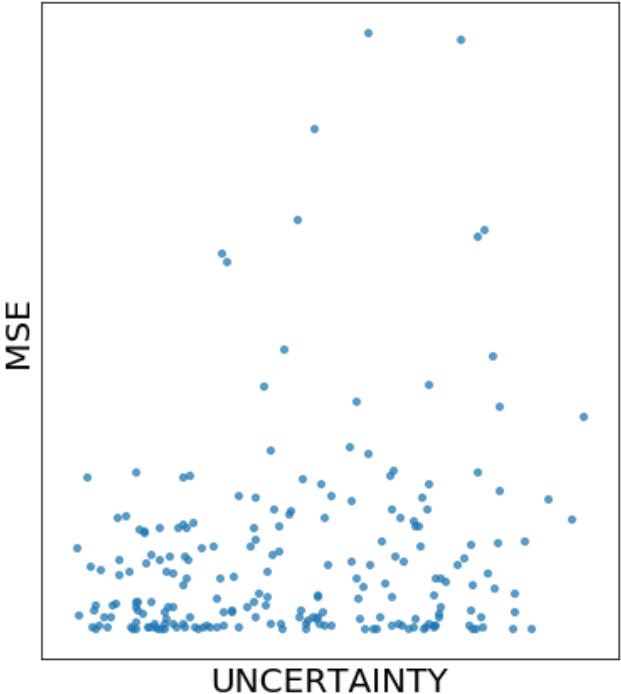

BAC

Morgan FP  
ChEMBL4308

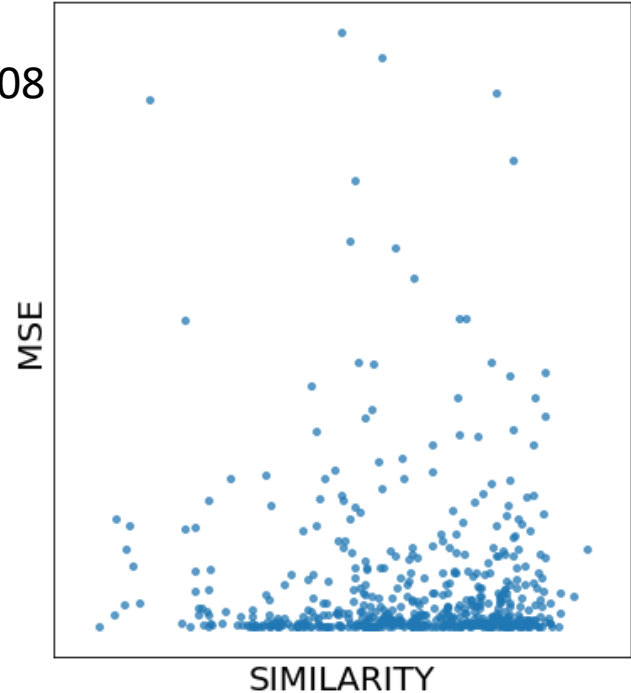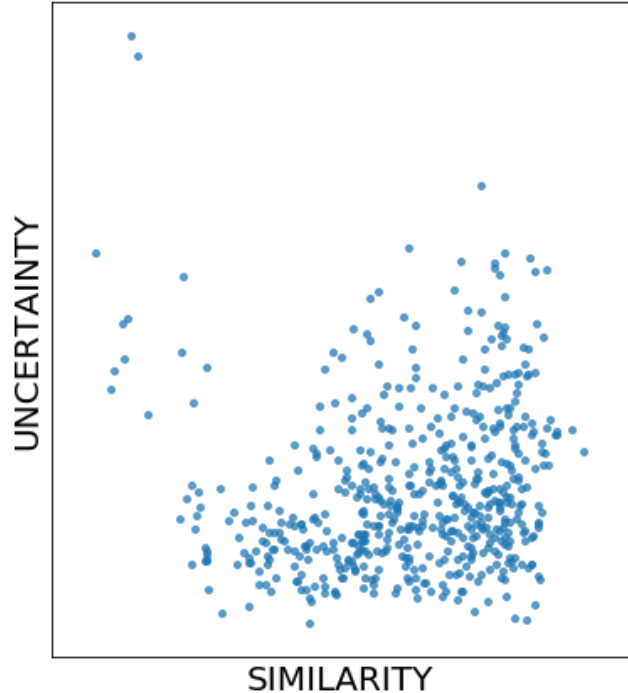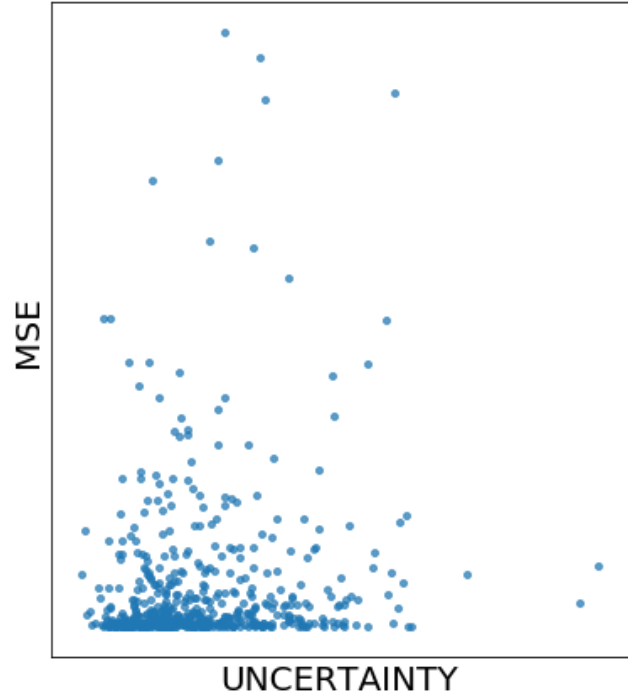

CV

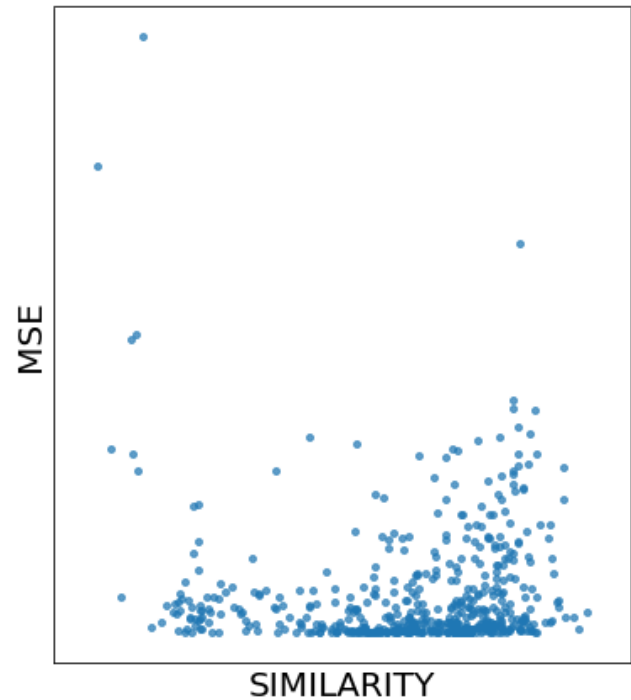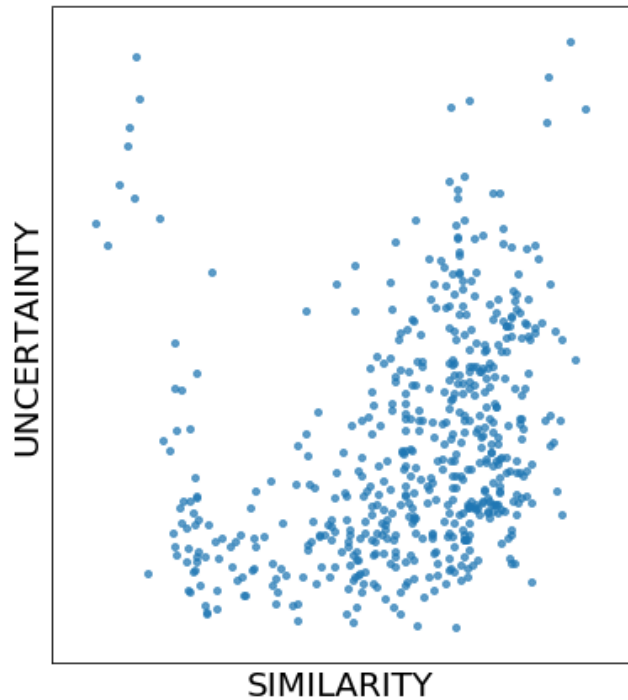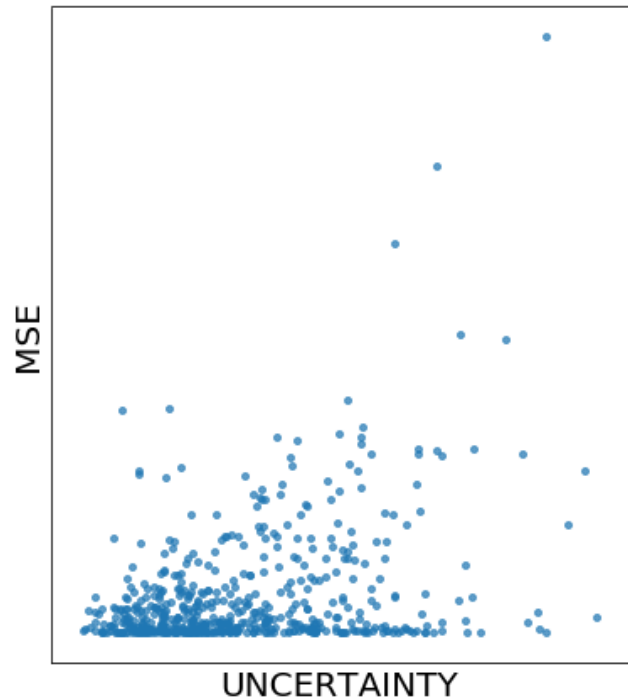

BAC

Morgan FP  
ChEMBL4608

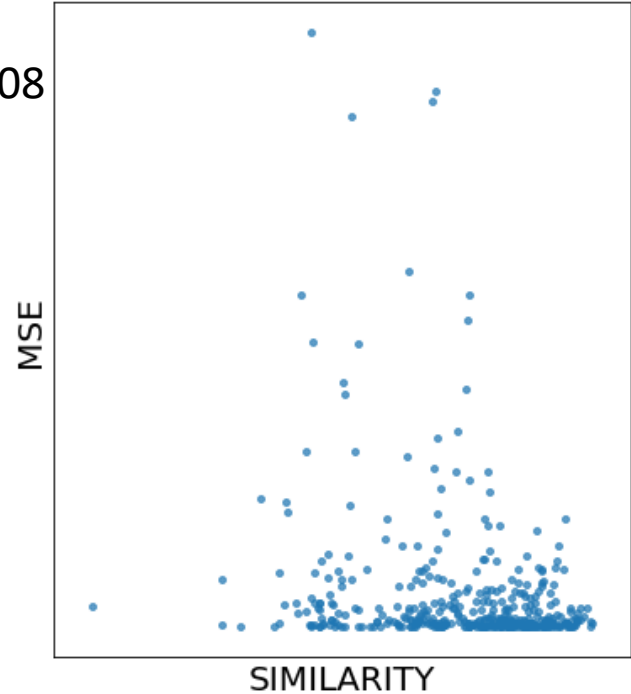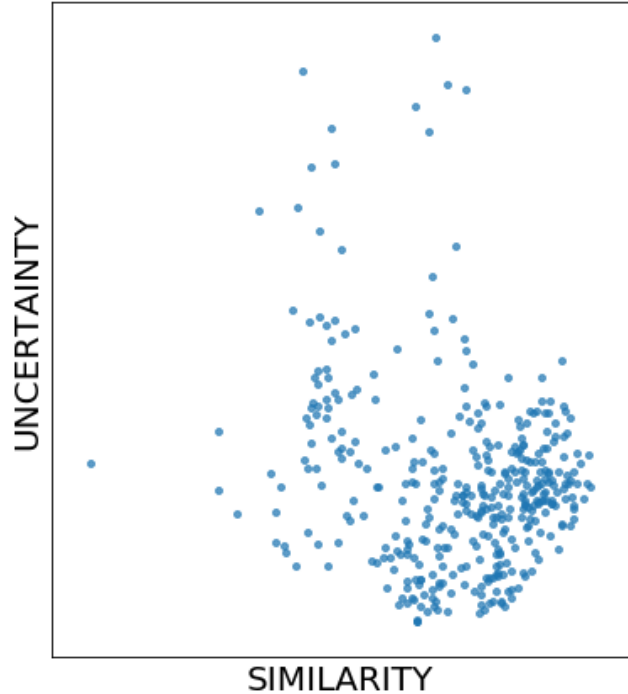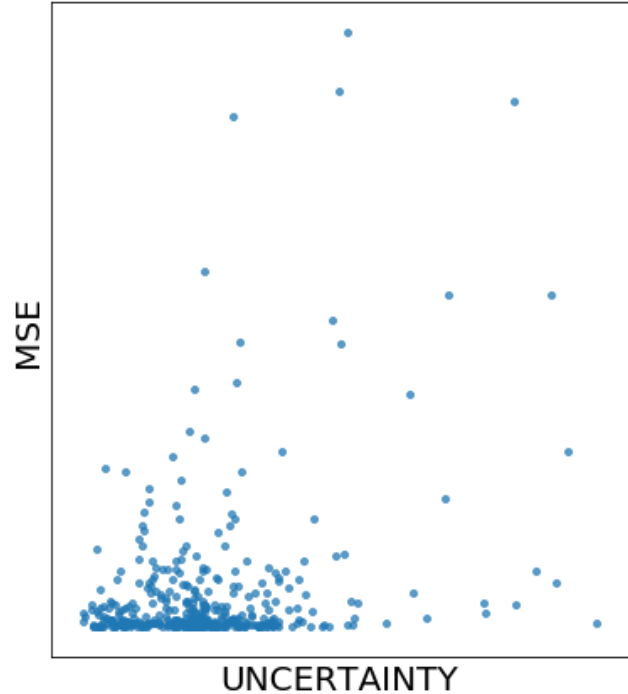

CV

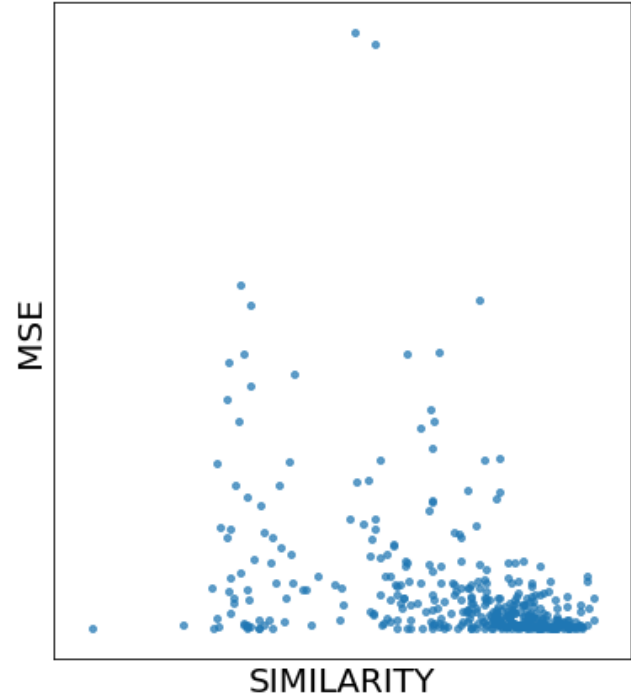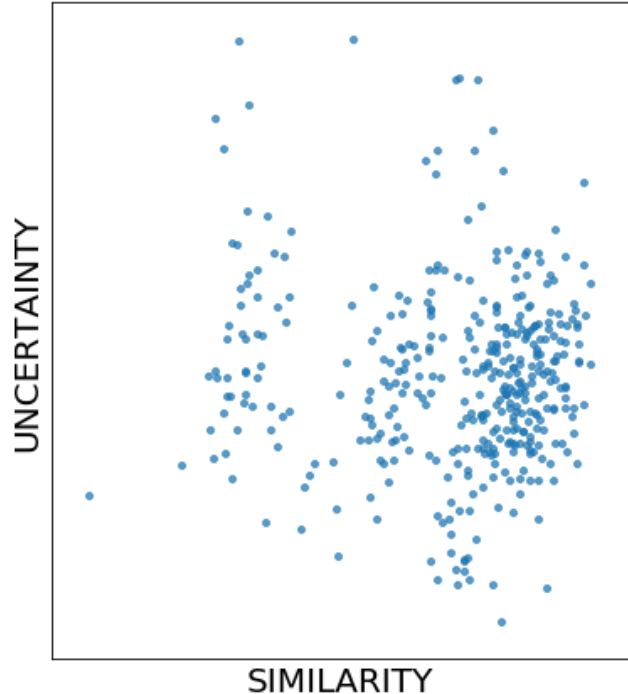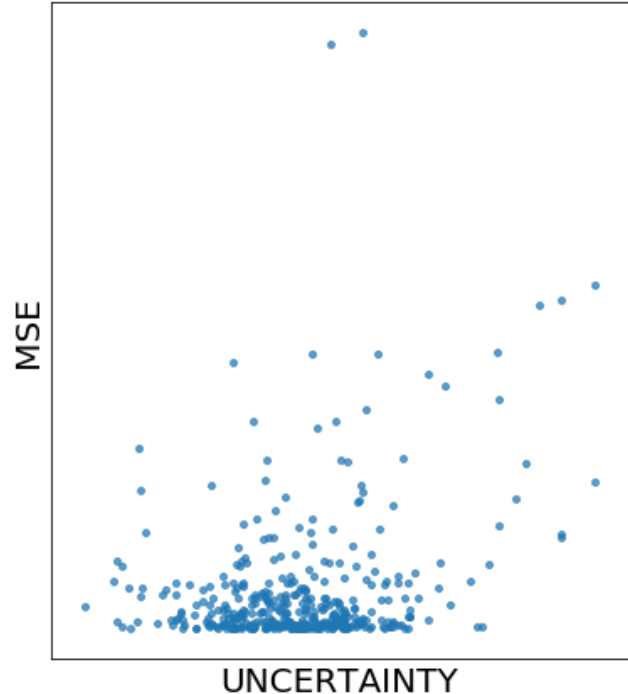

BAC

Morgan FP  
ChEMBL4644

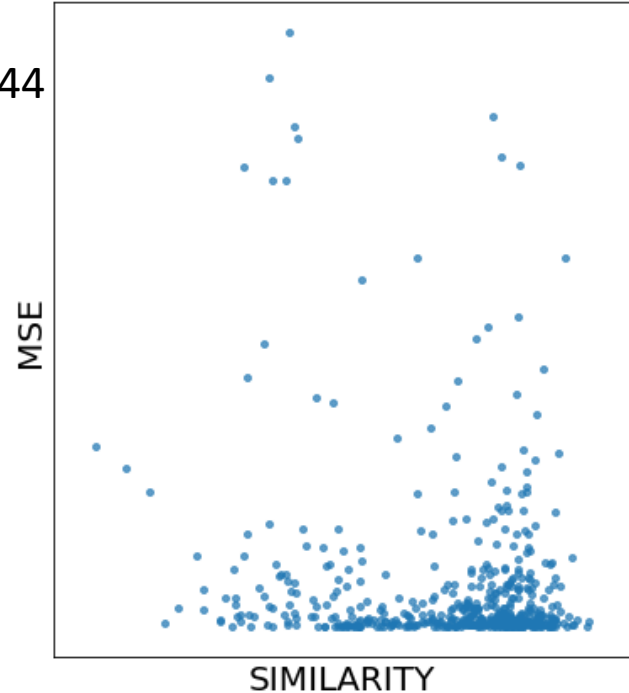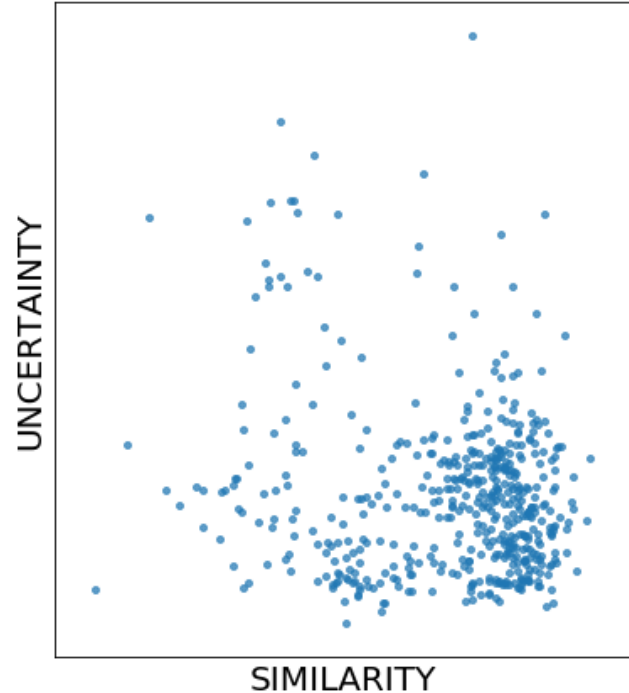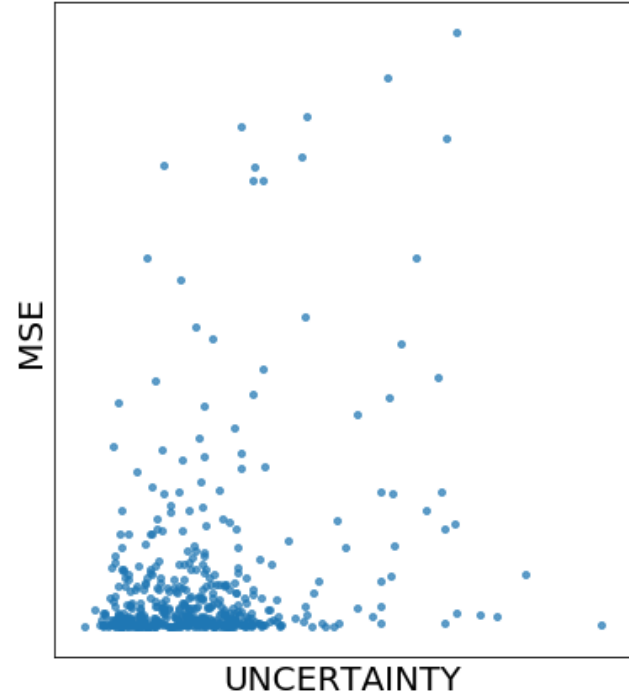

CV

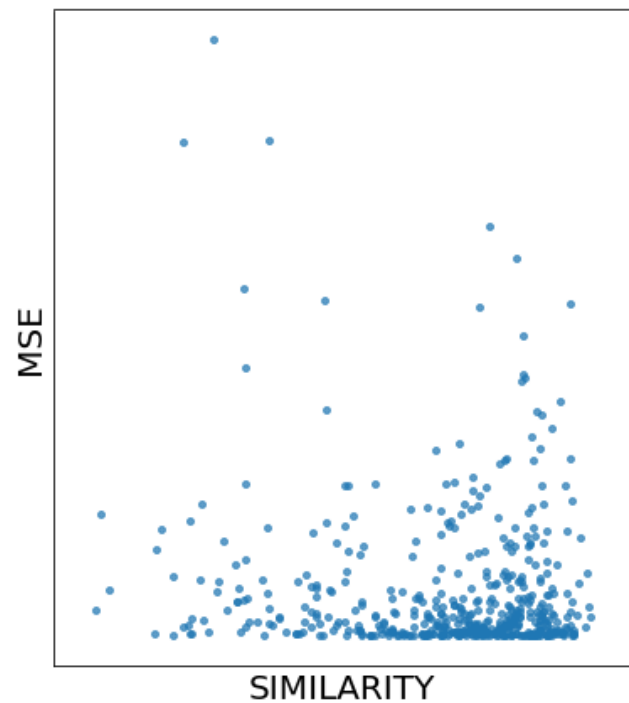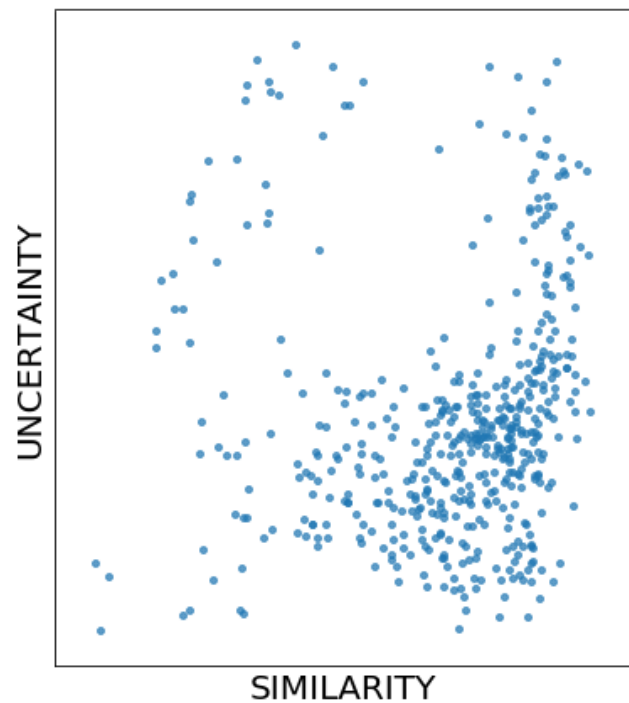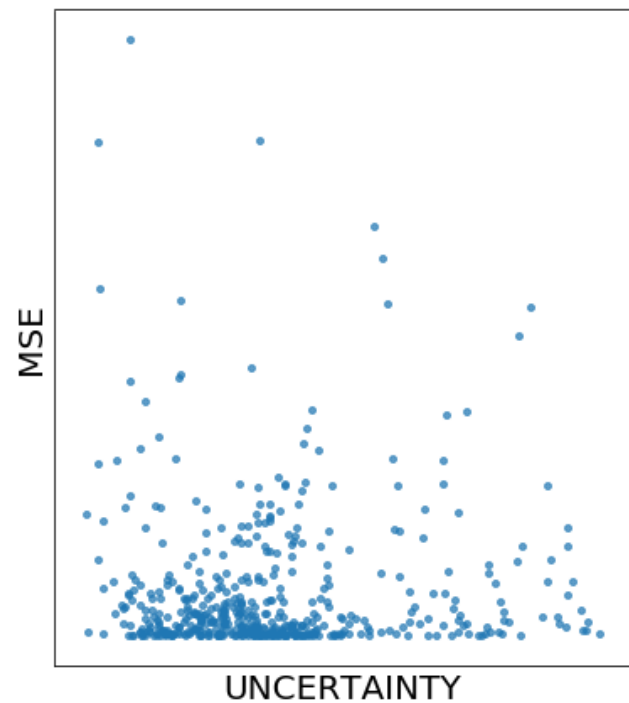

BAC



Morgan FP  
ChEMBL4792

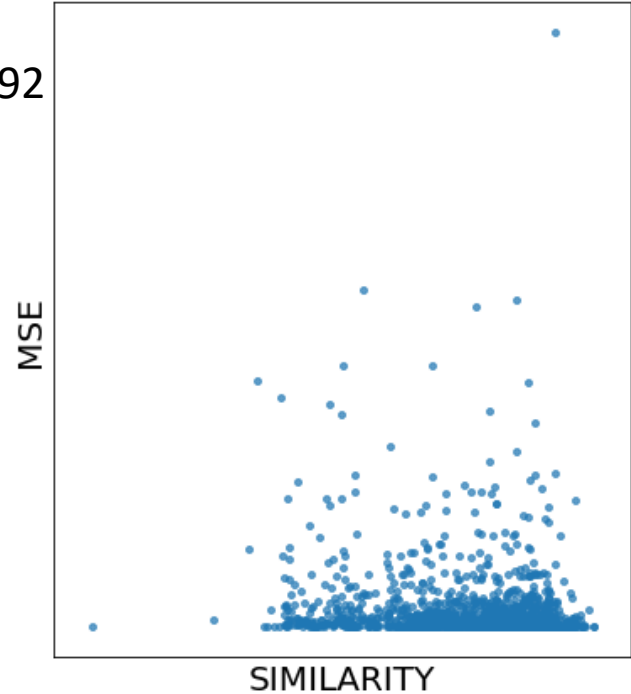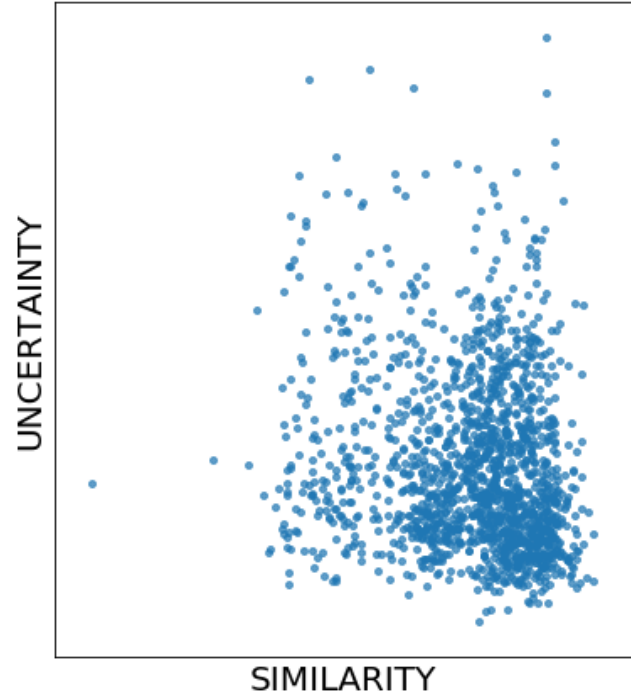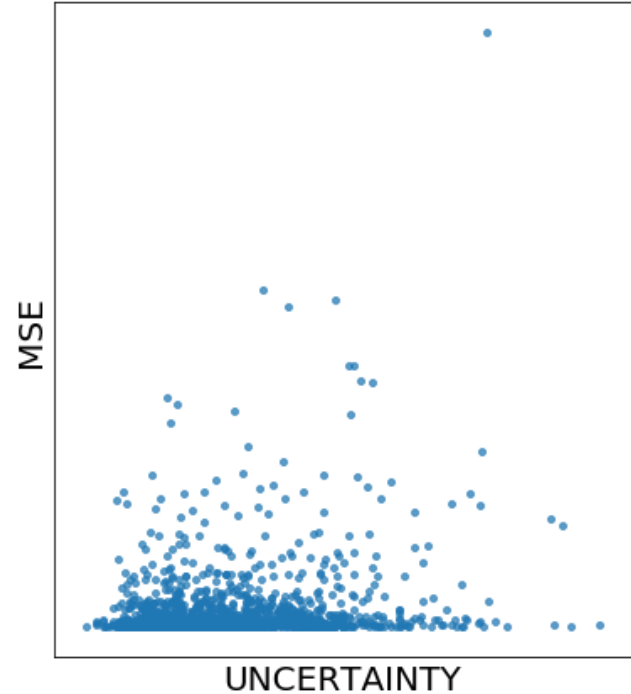

CV

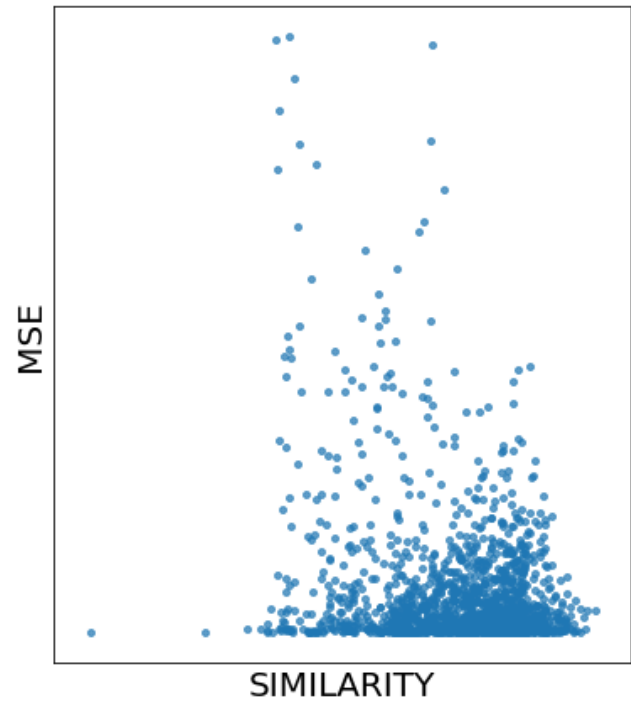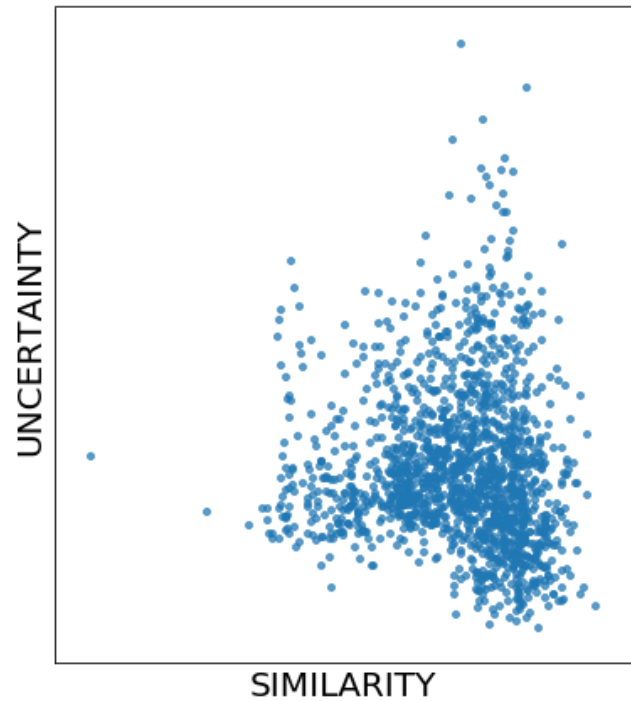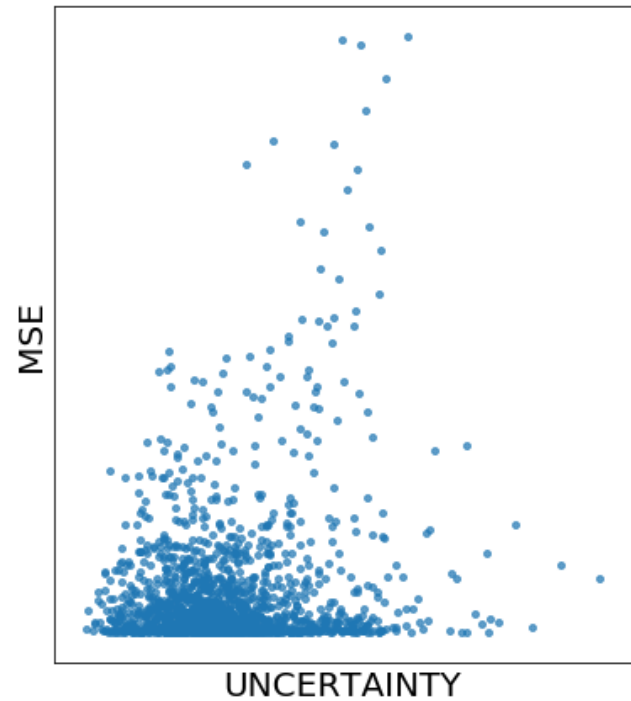

BAC

Morgan FP  
CHEMBL5113

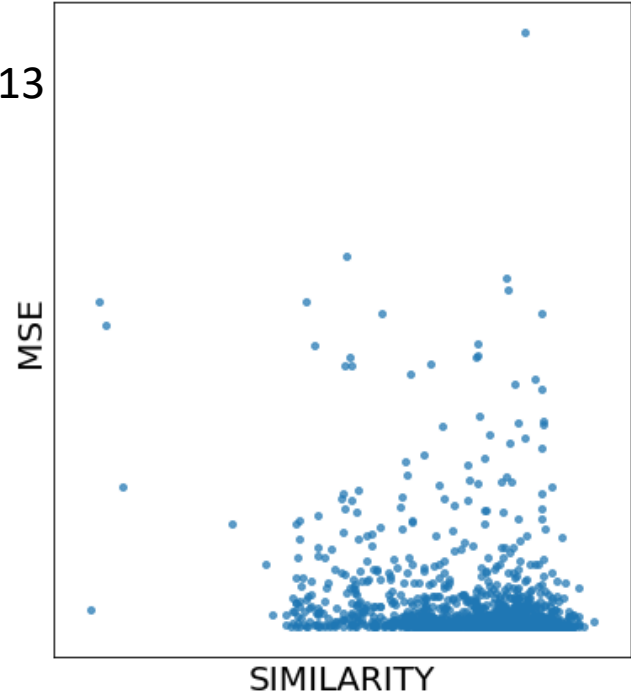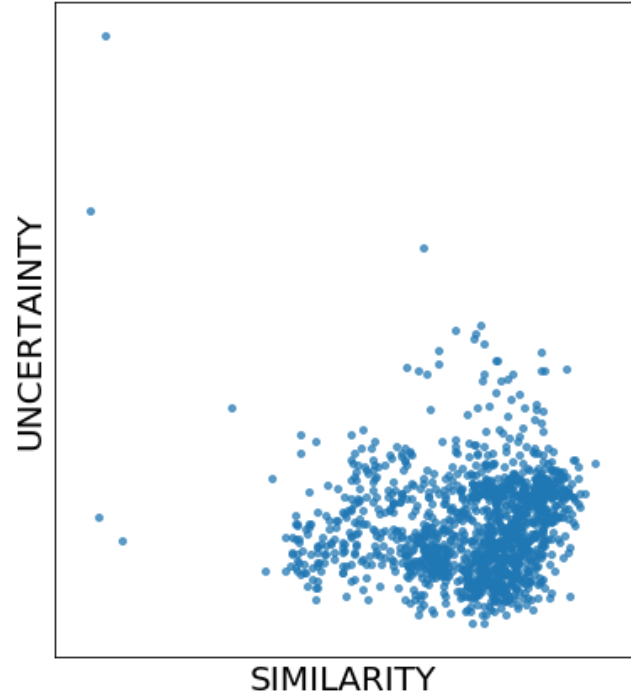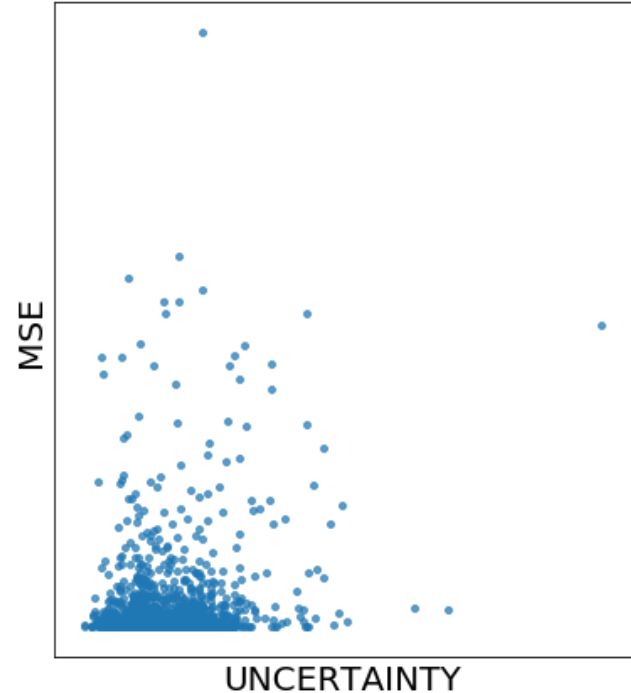

CV

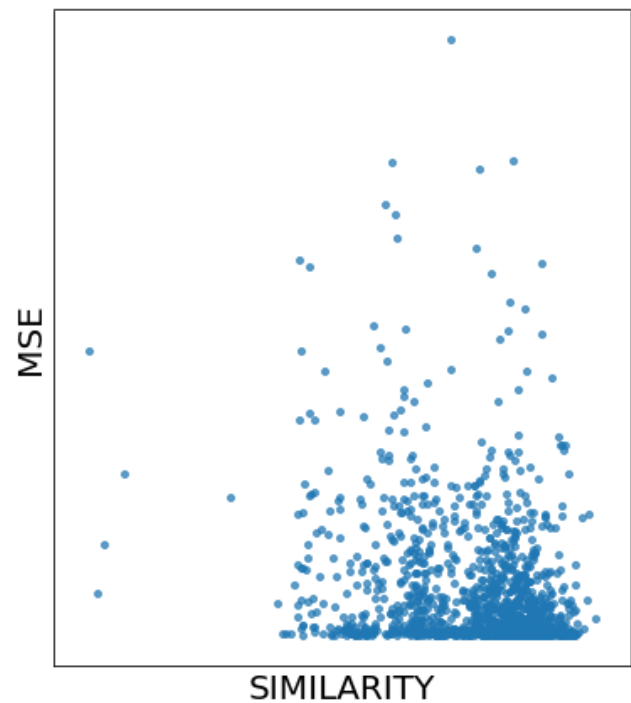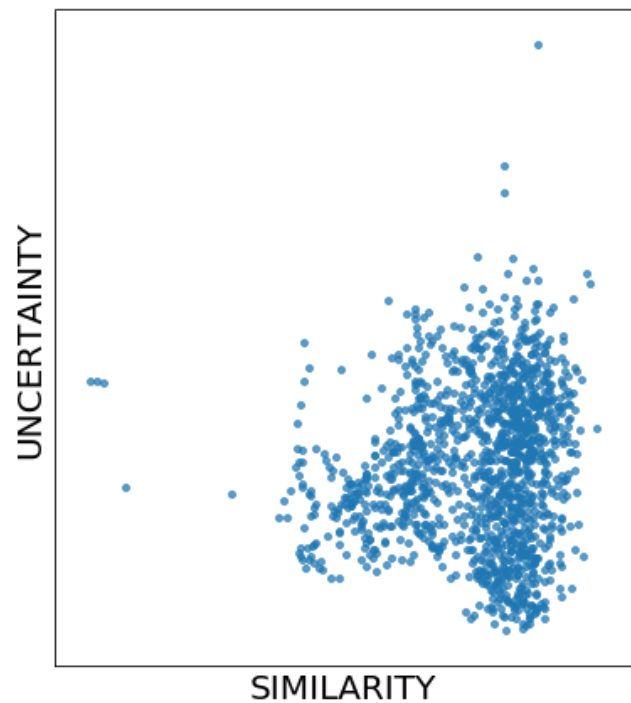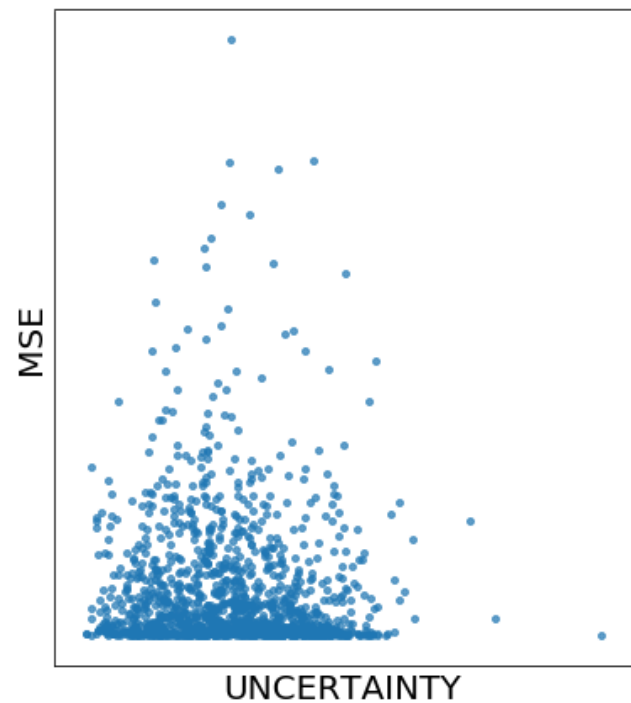

BAC

MACCSFP  
CHEMBL214

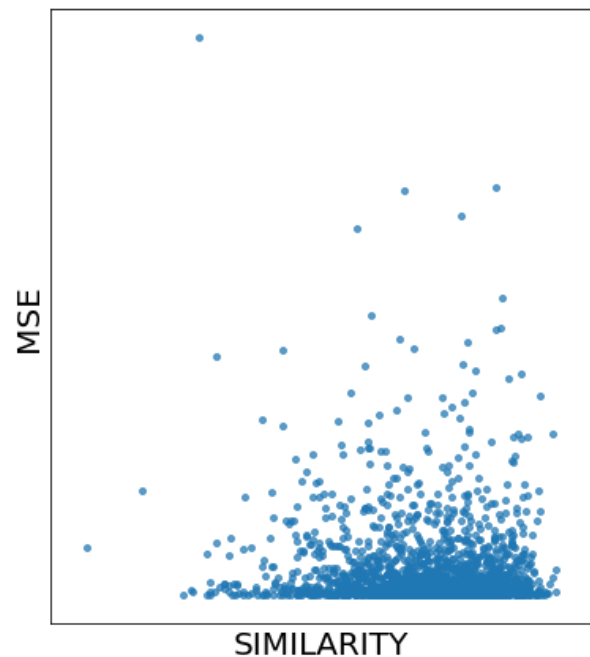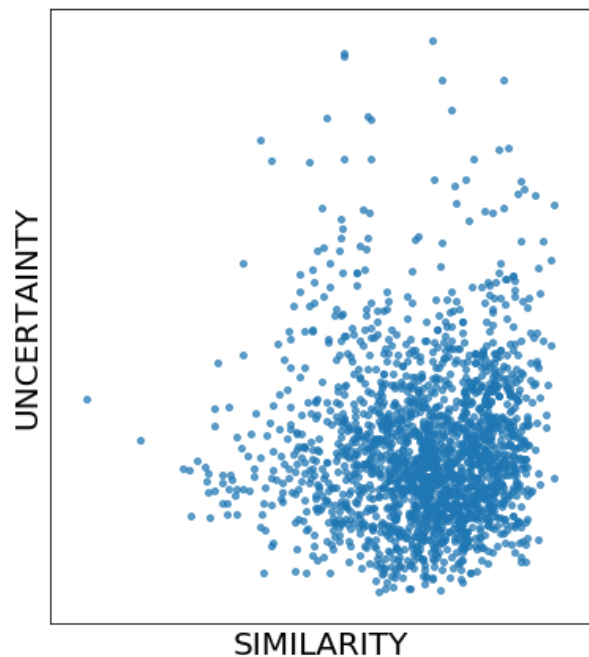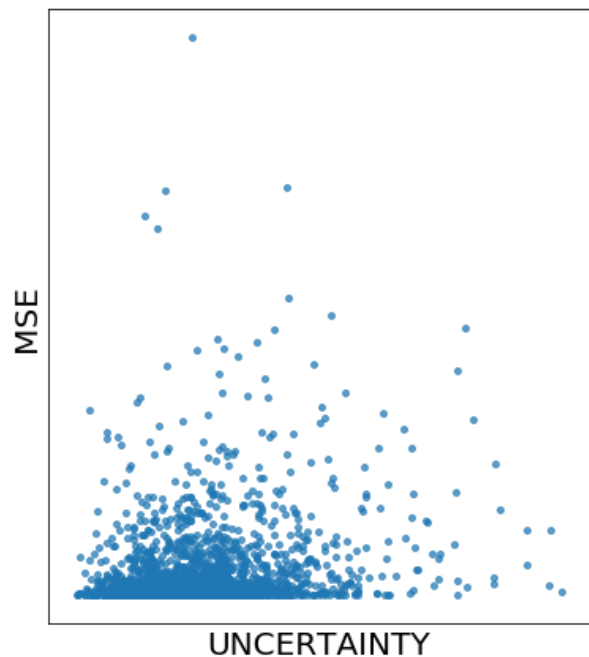

CV

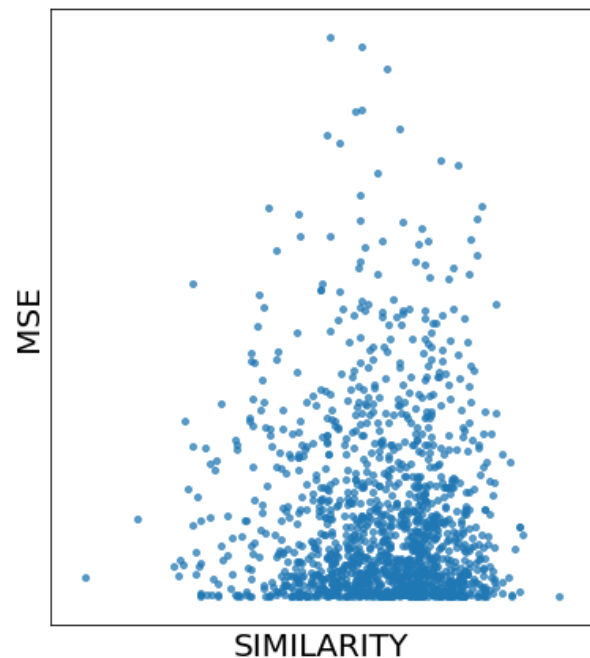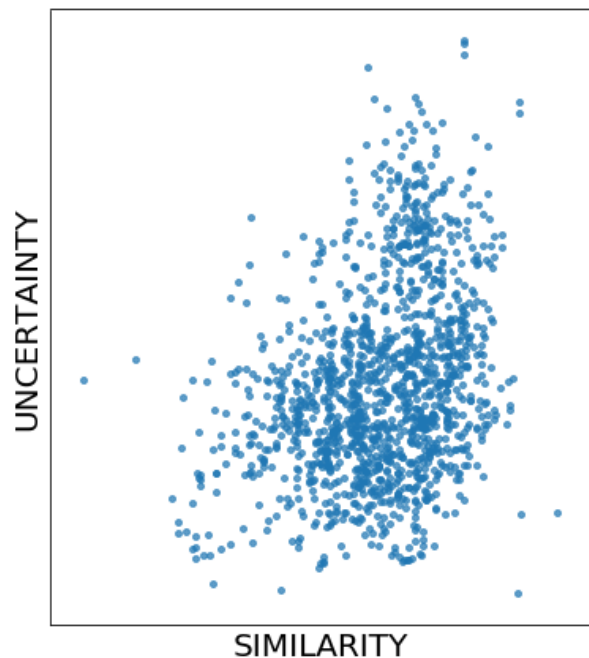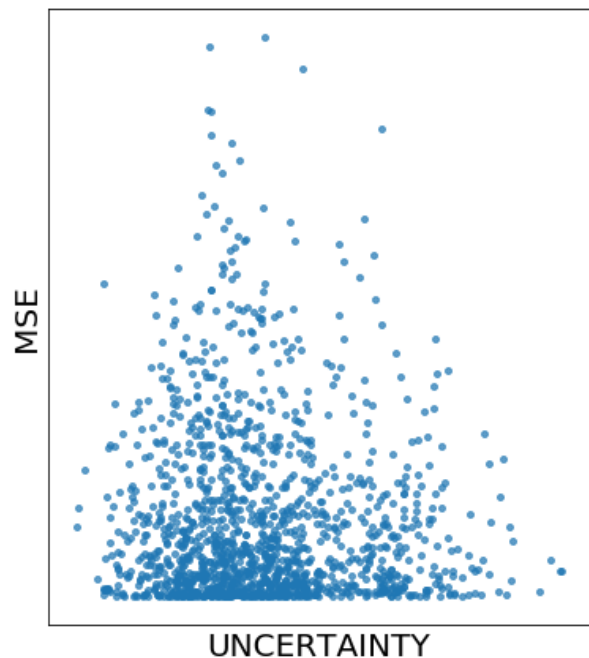

BAC

MACCSFP  
CHEMBL216

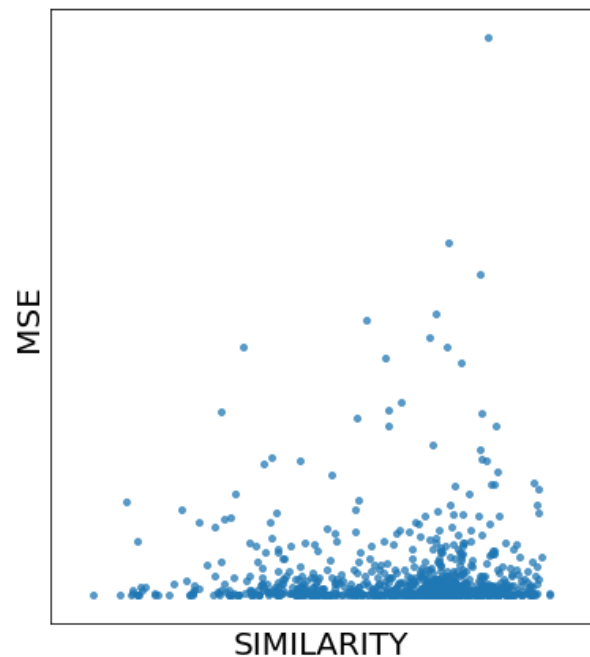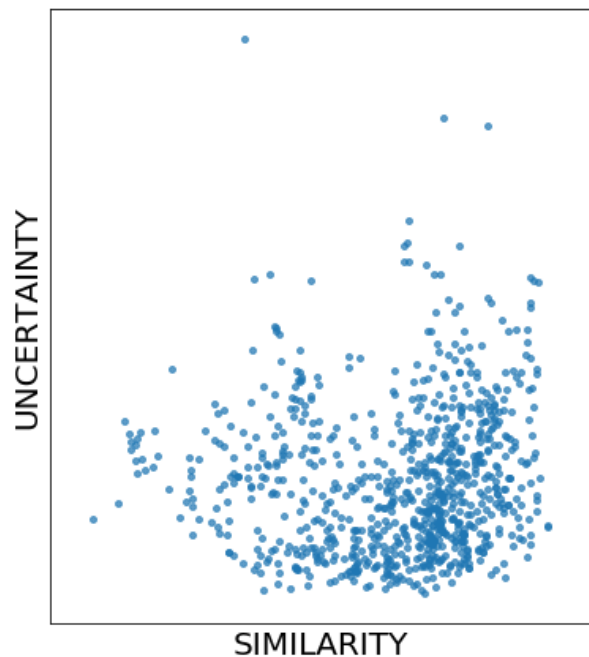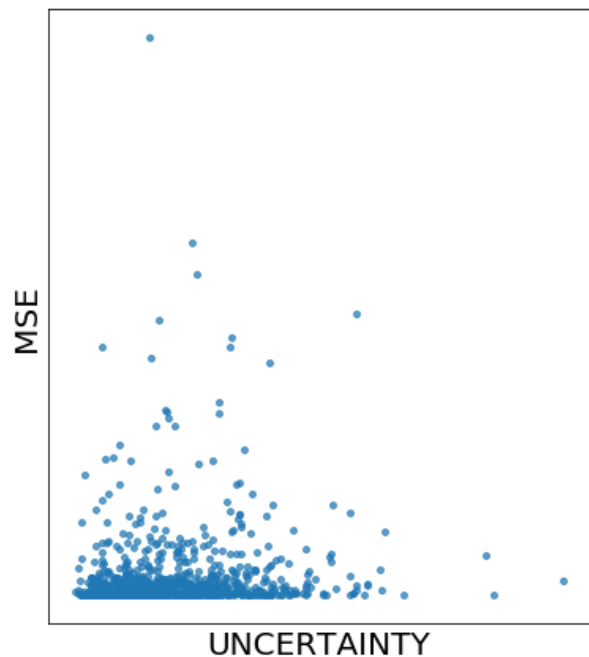

CV

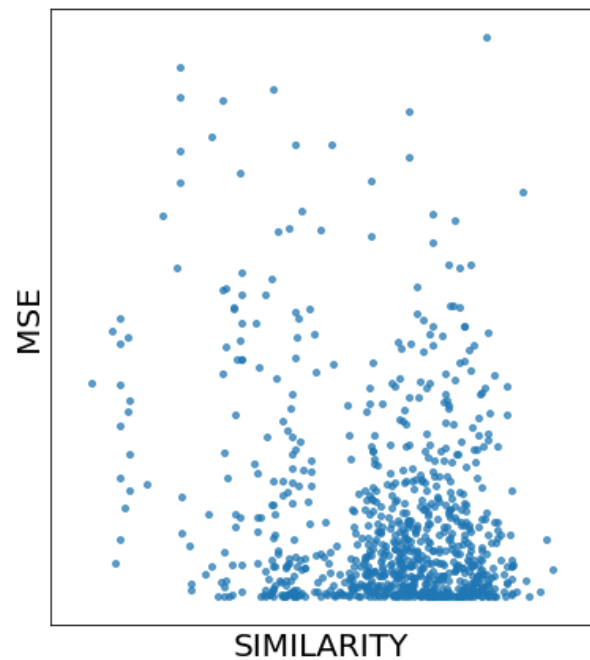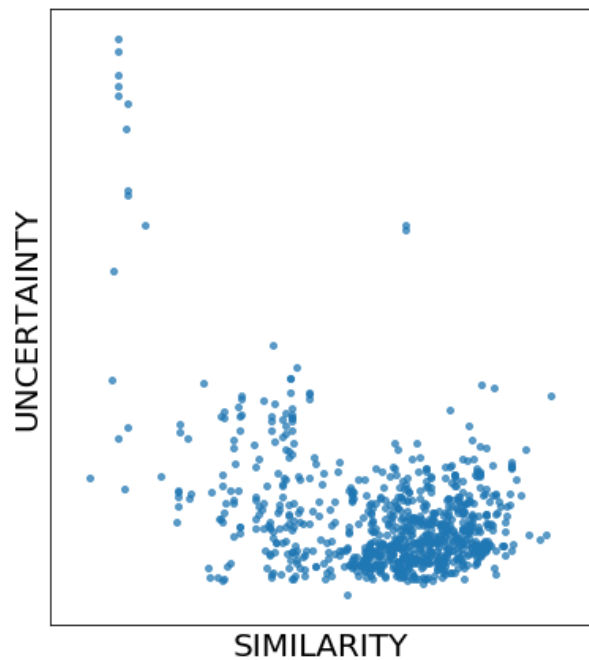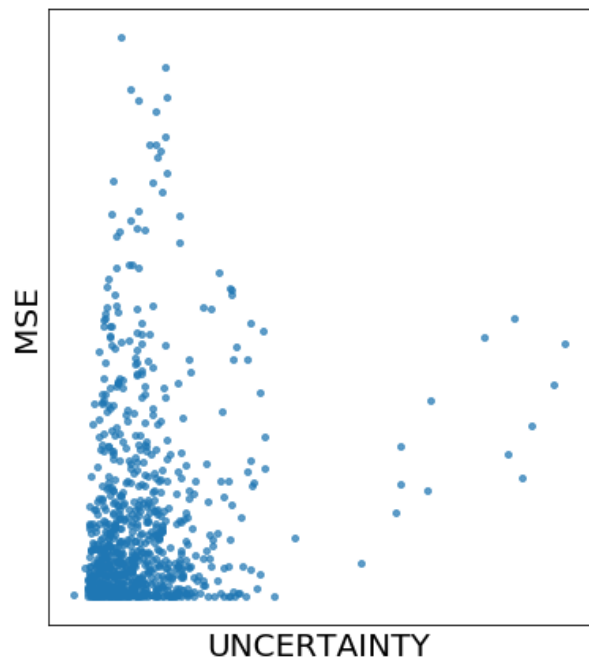

BAC

MACCSFP  
CHEMBL217

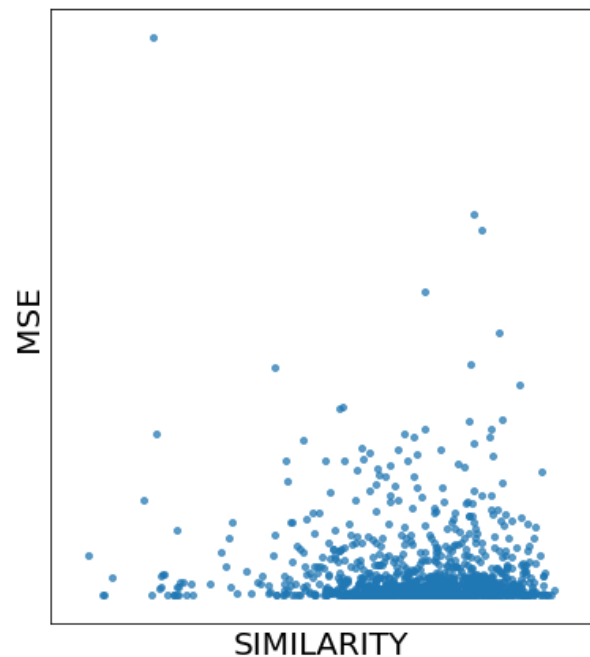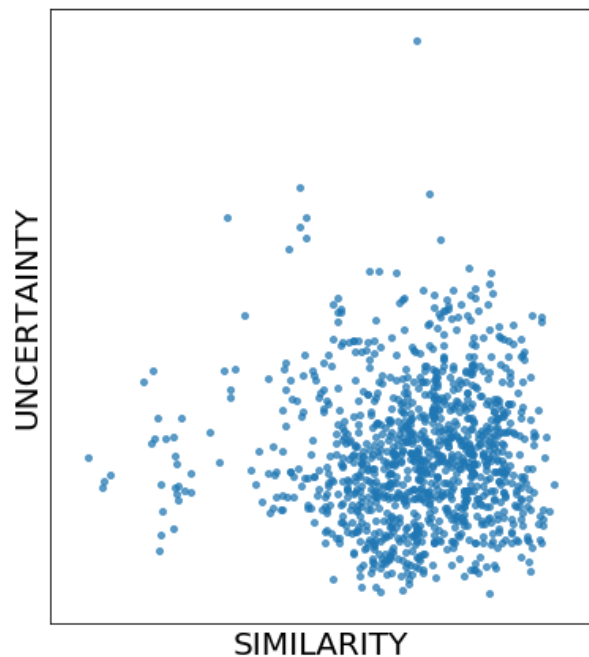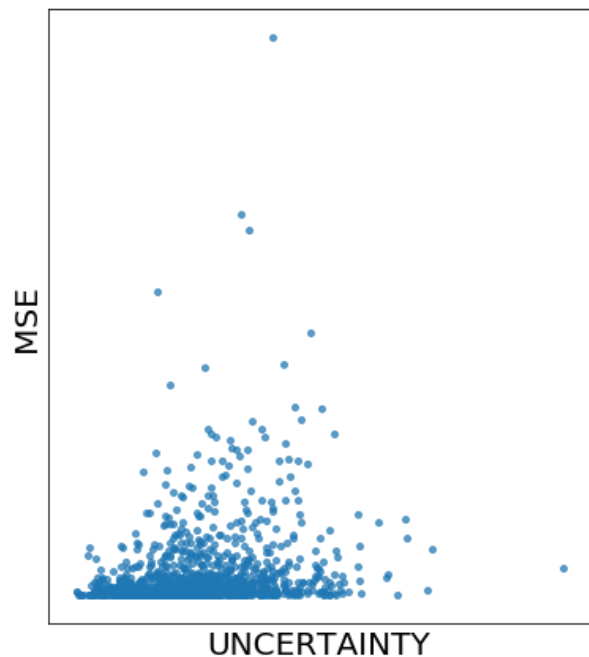

CV

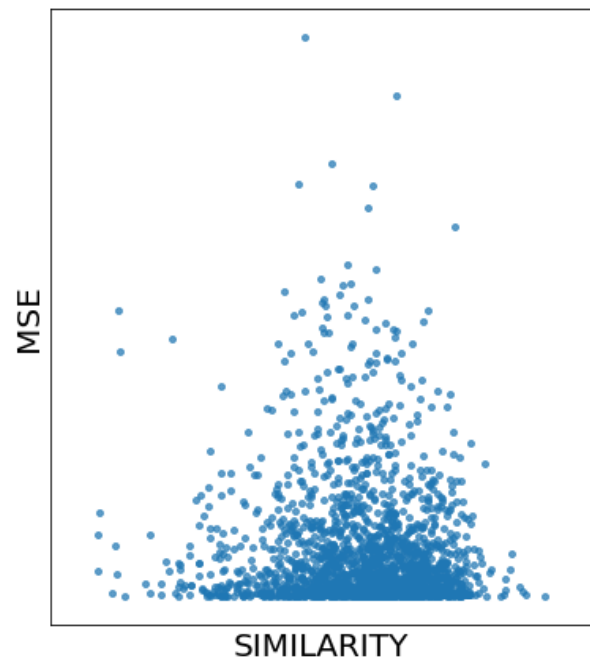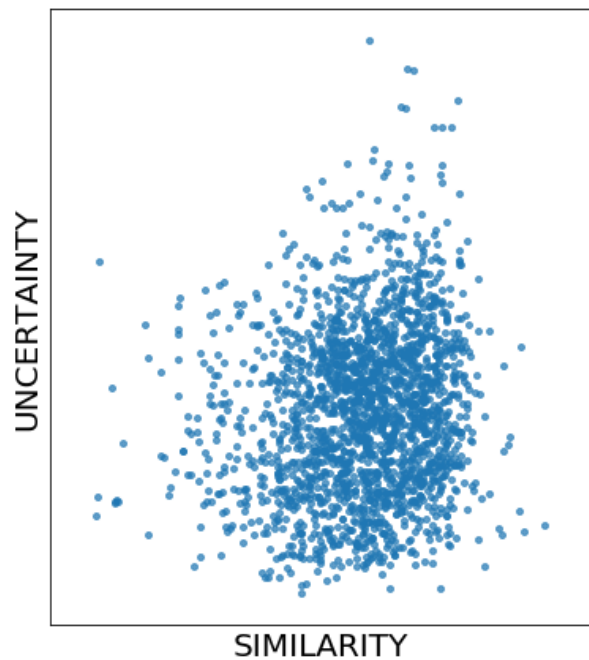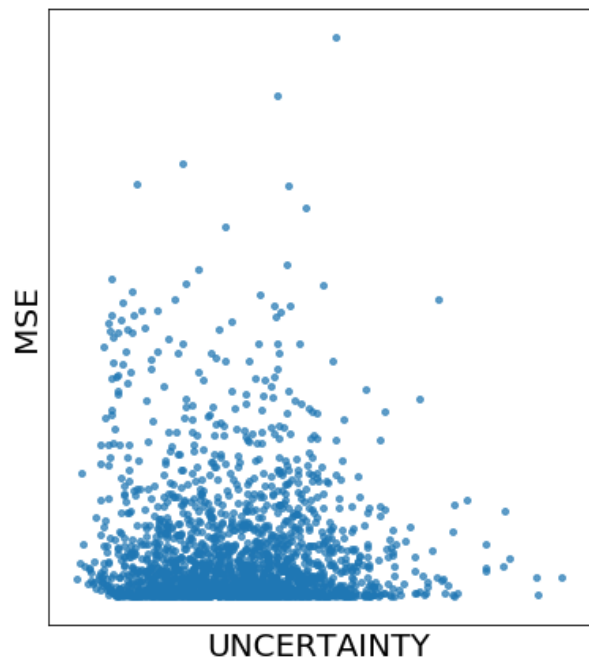

BAC



MACCSFP  
CHEMBL224

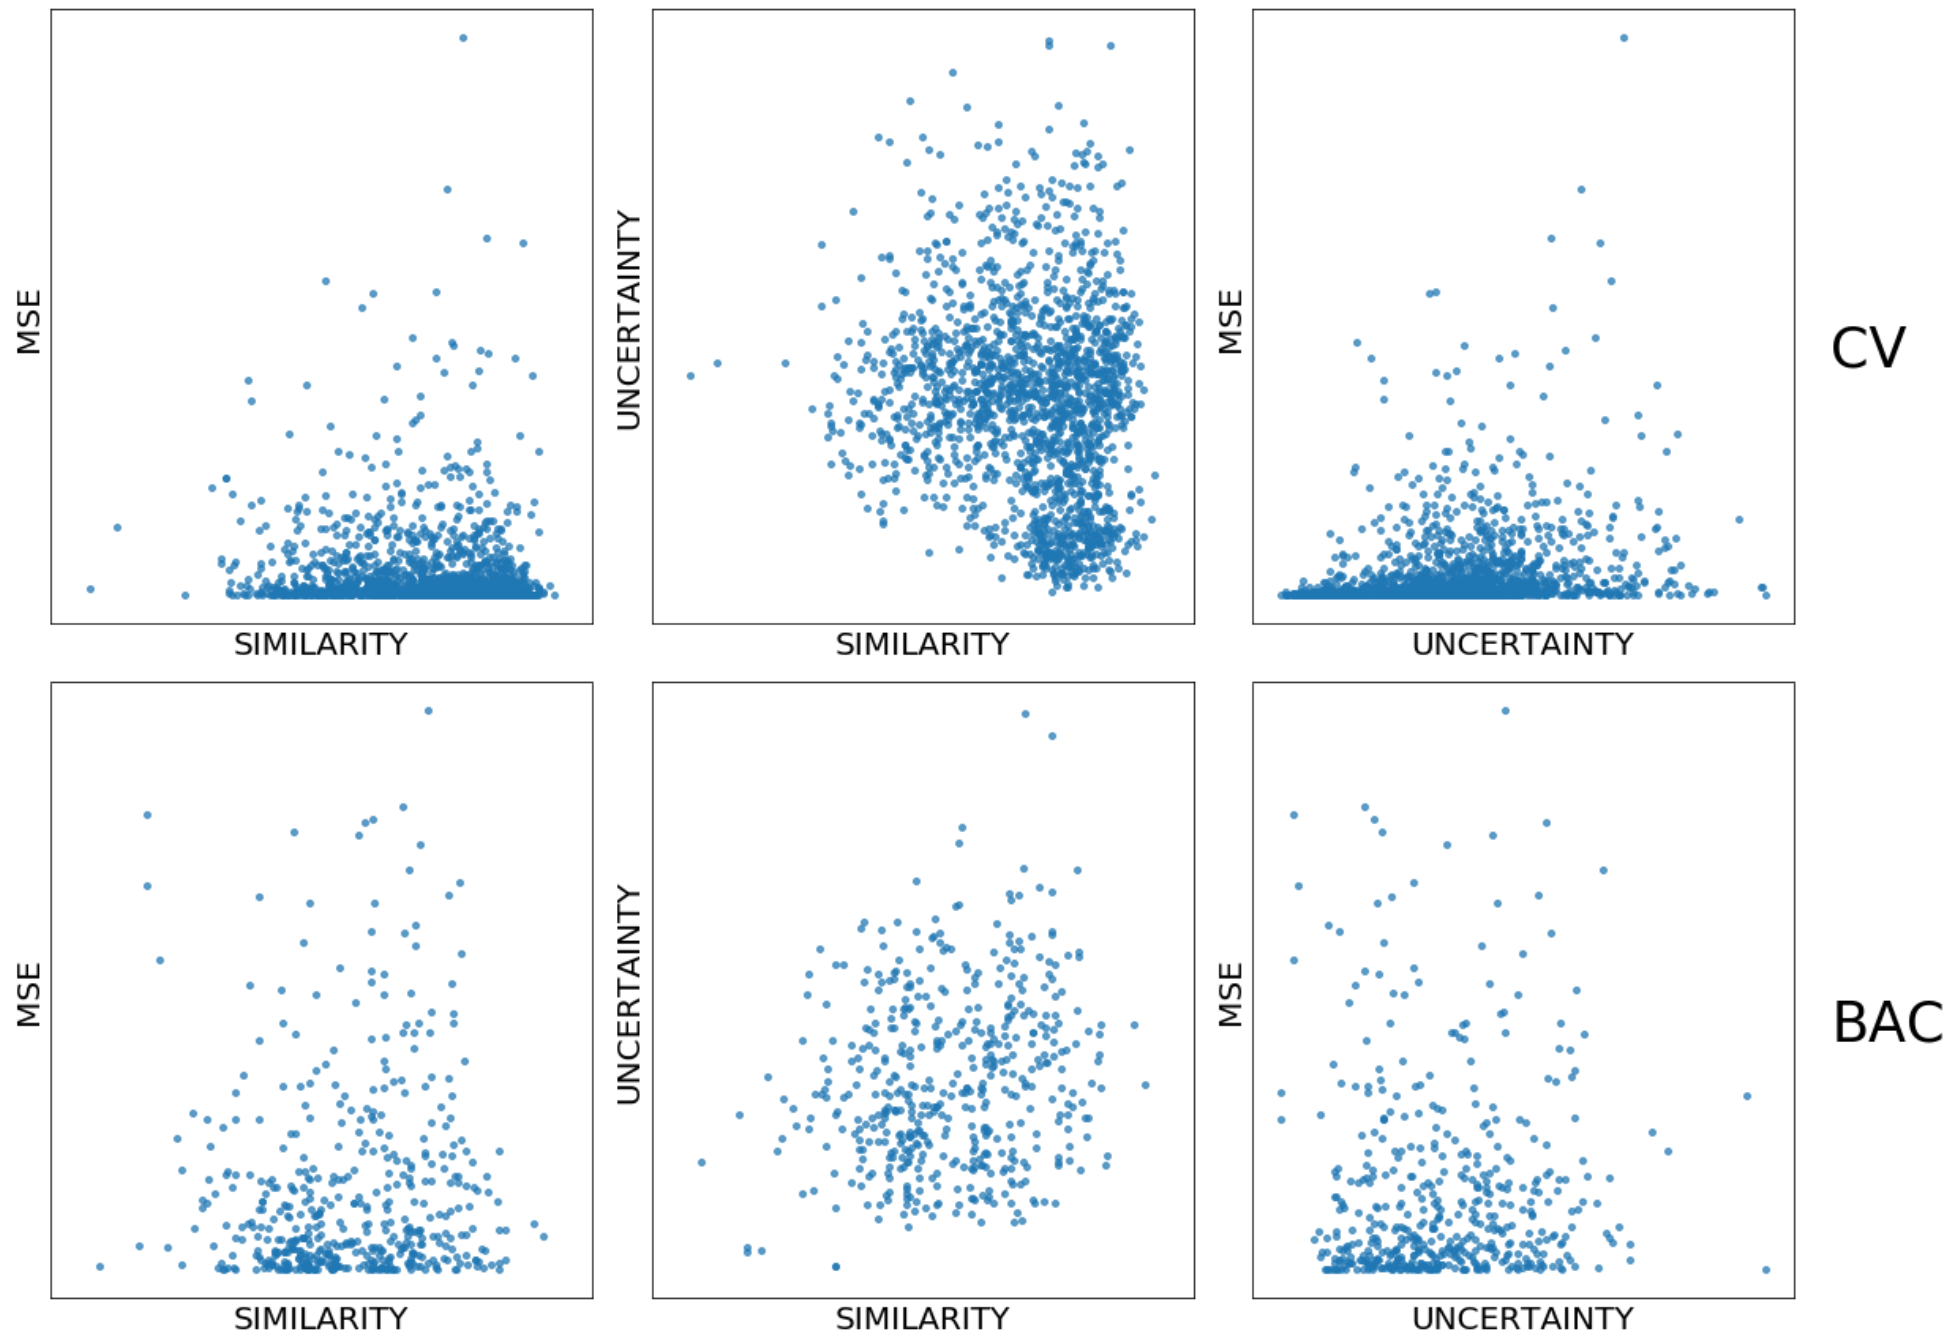

MACCSFP  
CHEMBL225

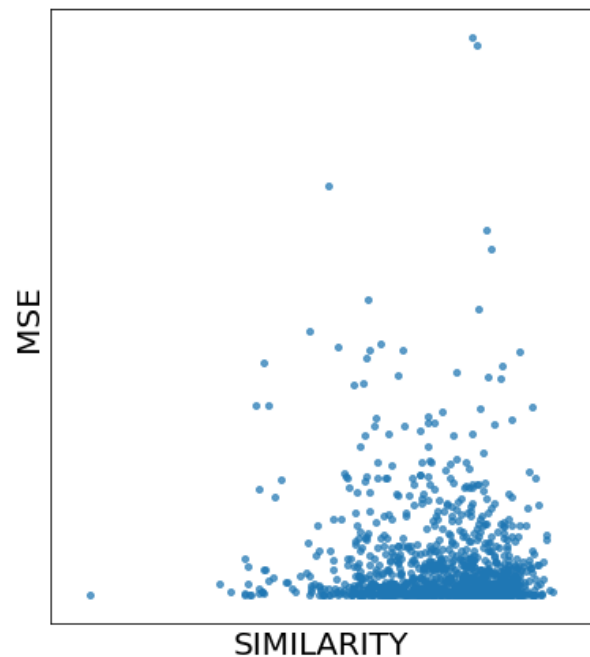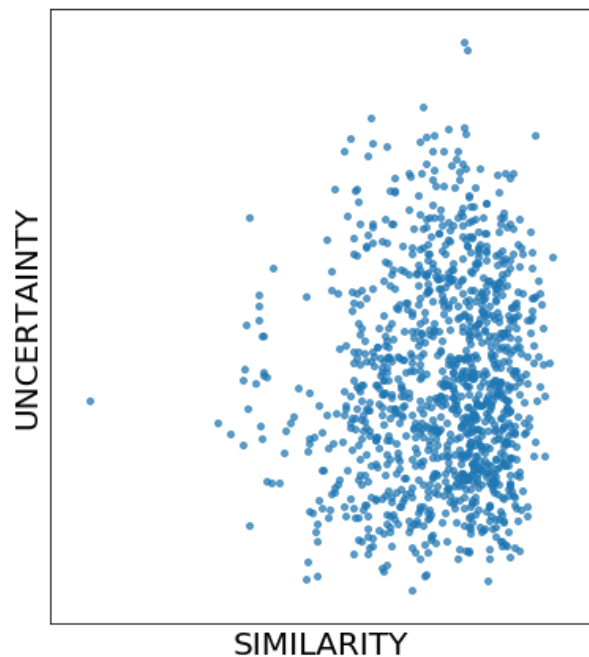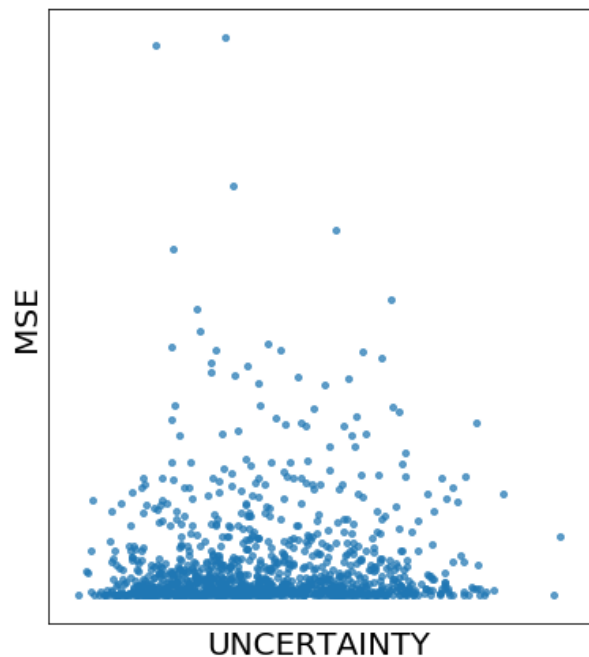

CV

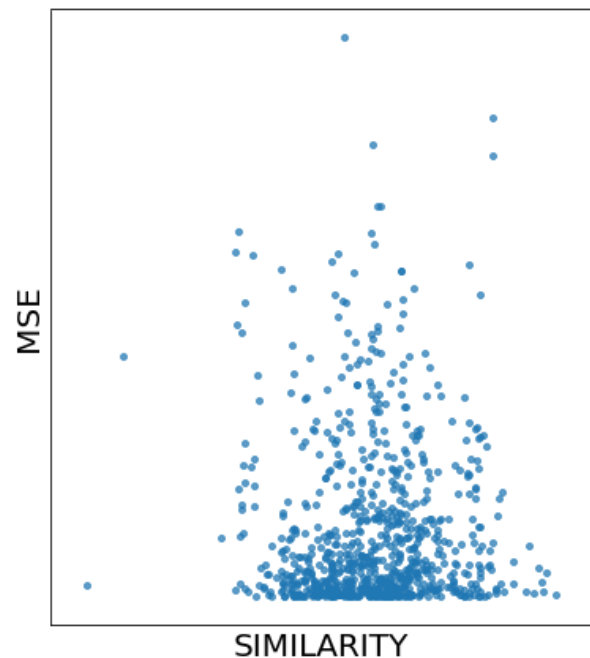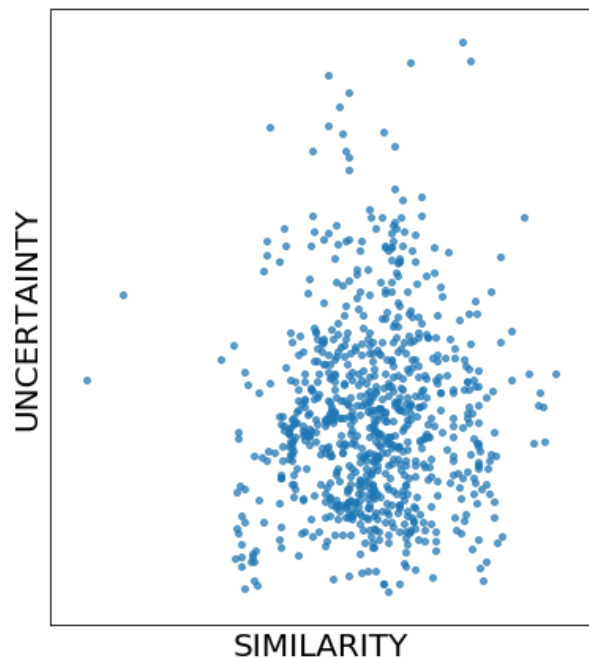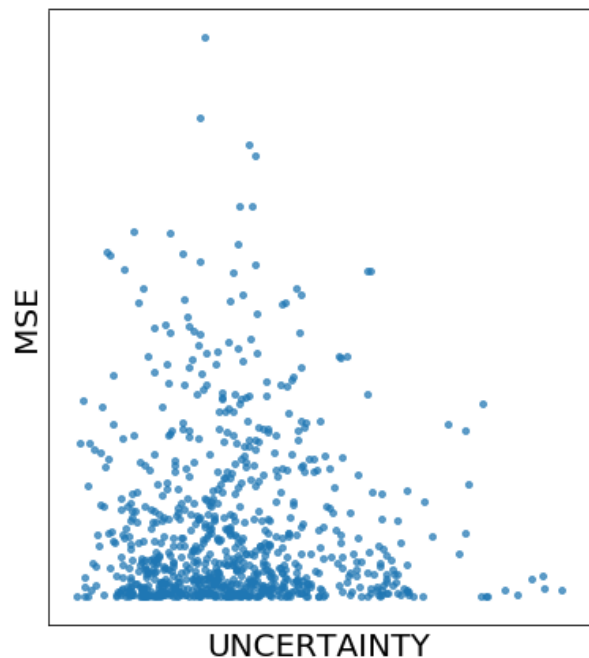

BAC

MACCSFP  
CHEMBL226

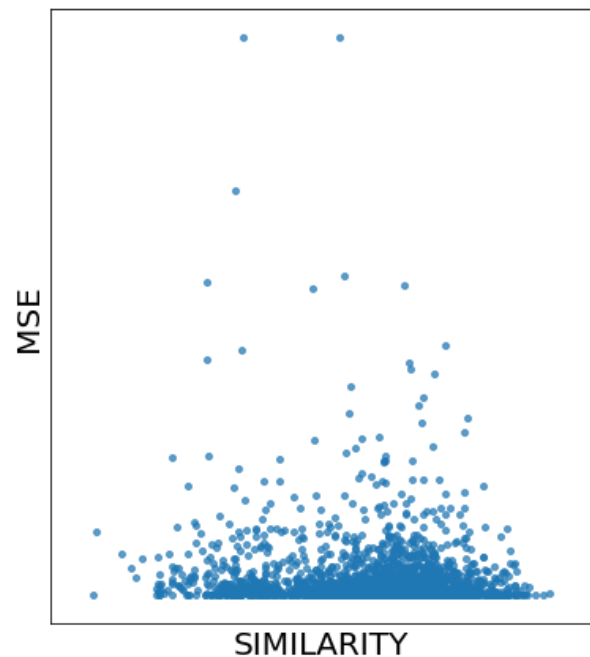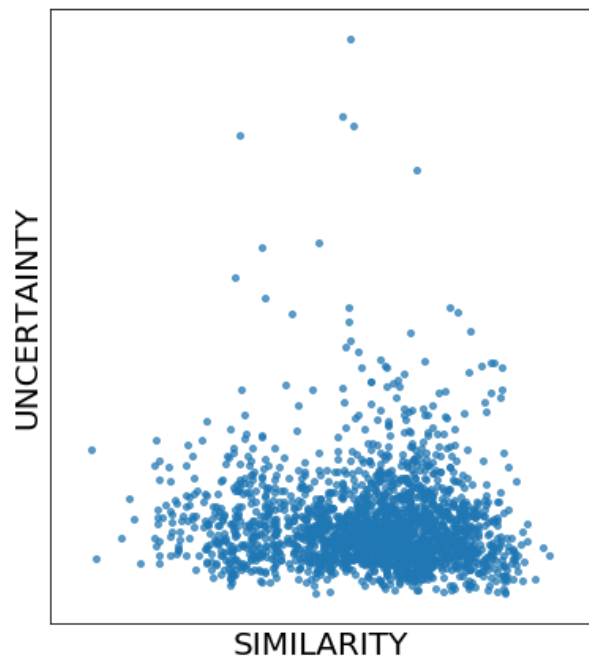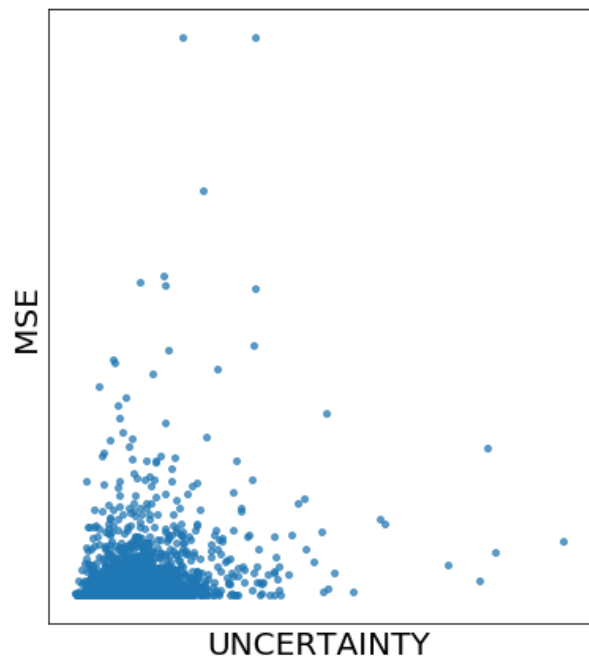

CV

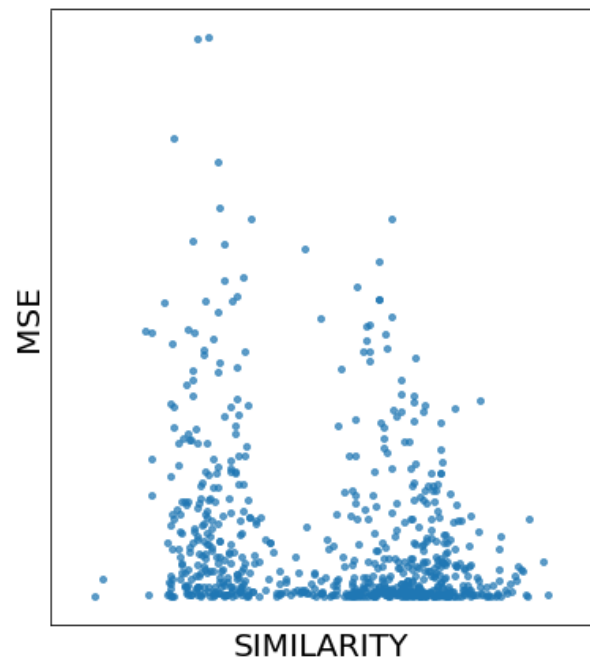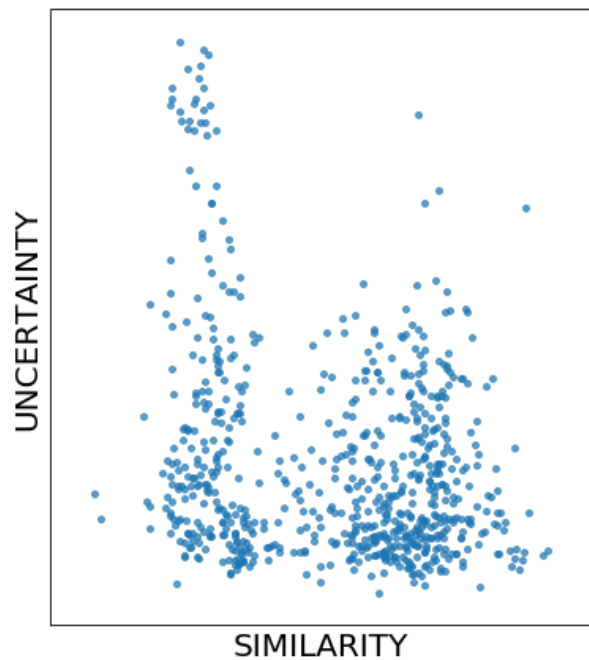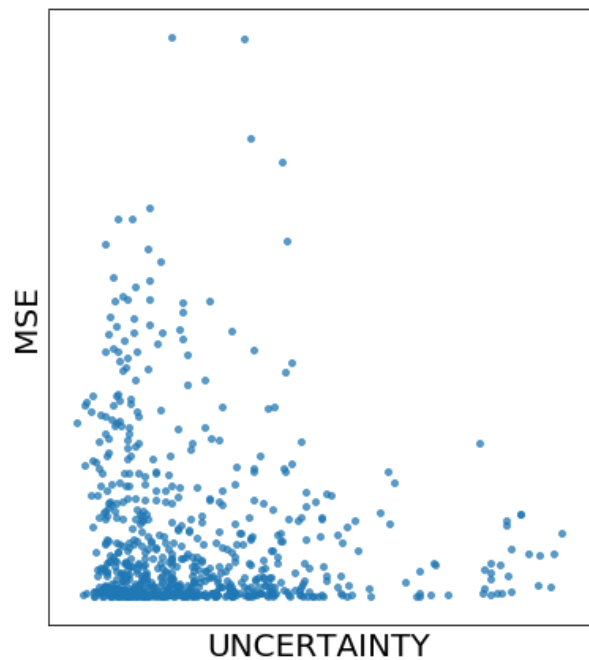

BAC

MACCSFP  
CHEMBL251

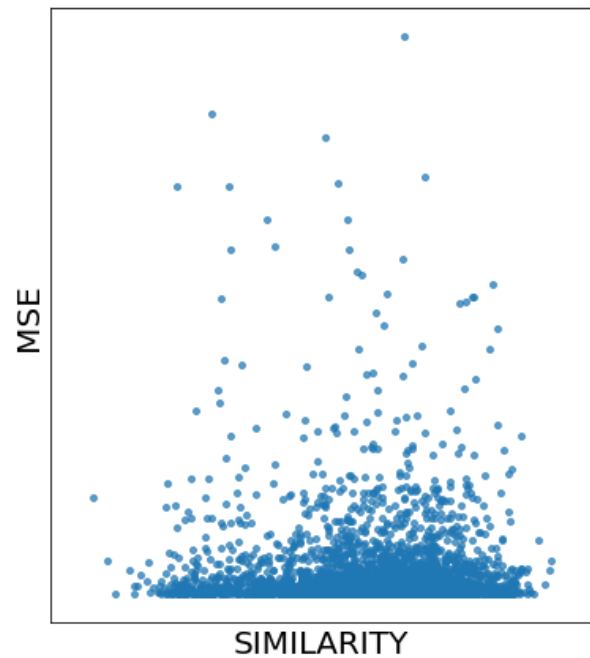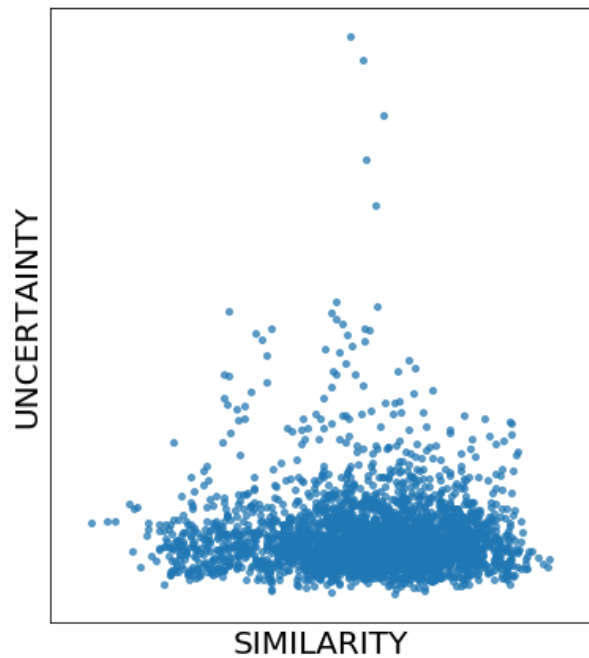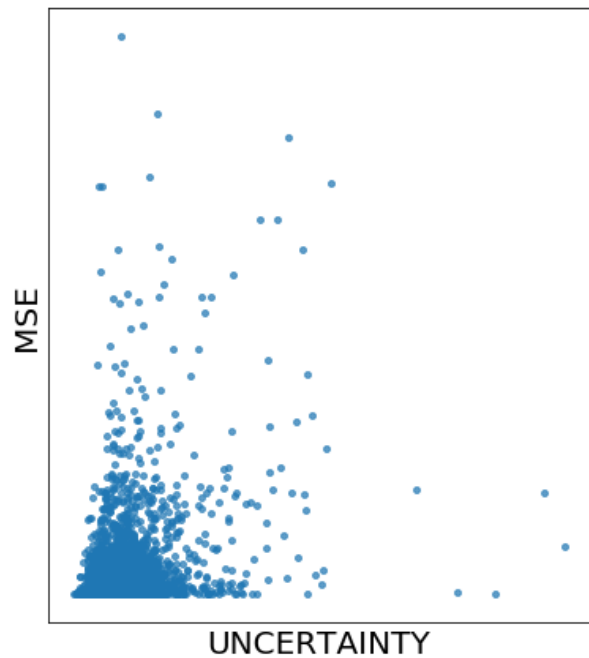

CV

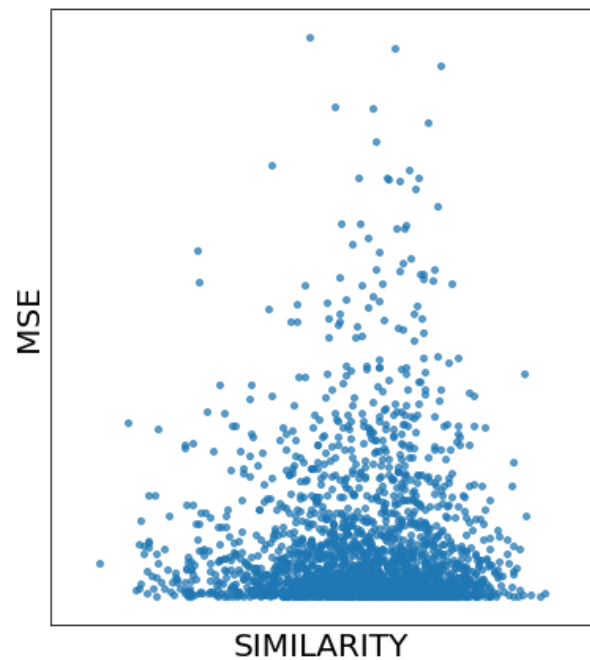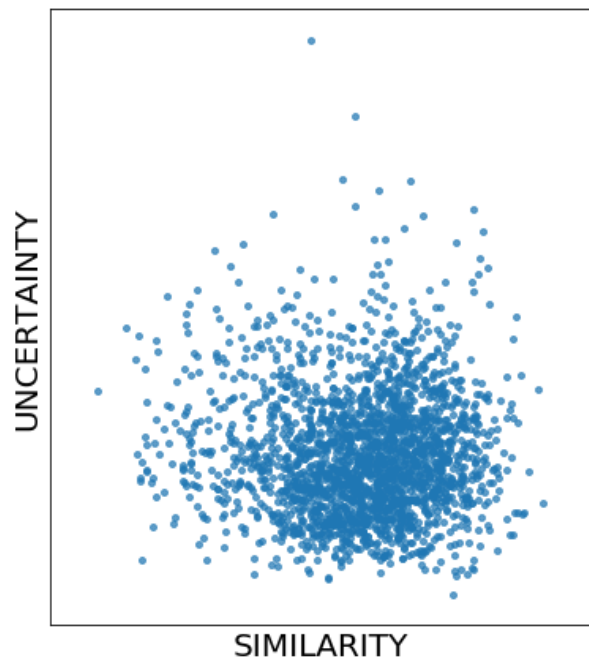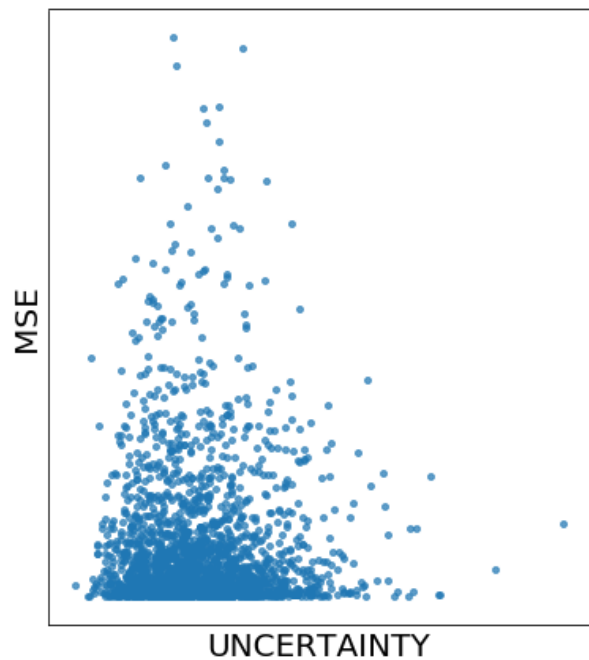

BAC

MACCSFP  
CHEMBL264

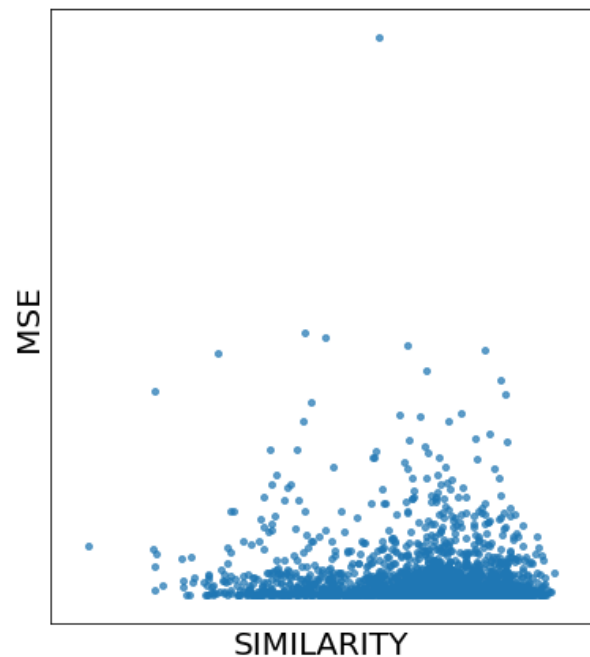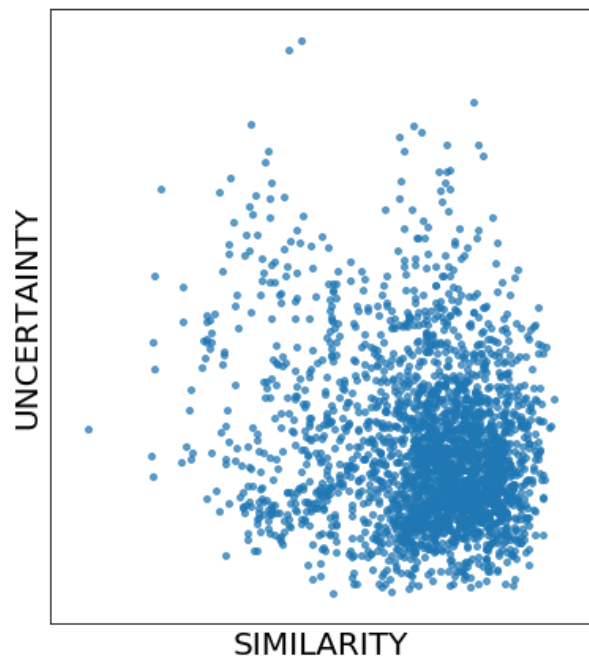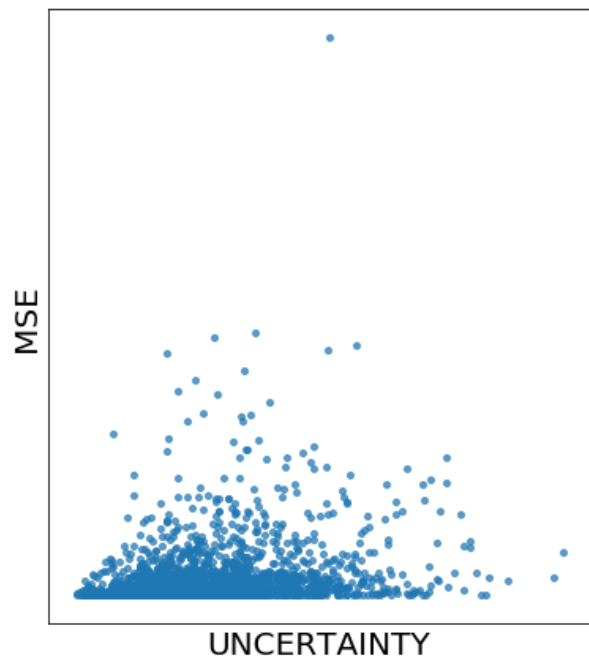

CV

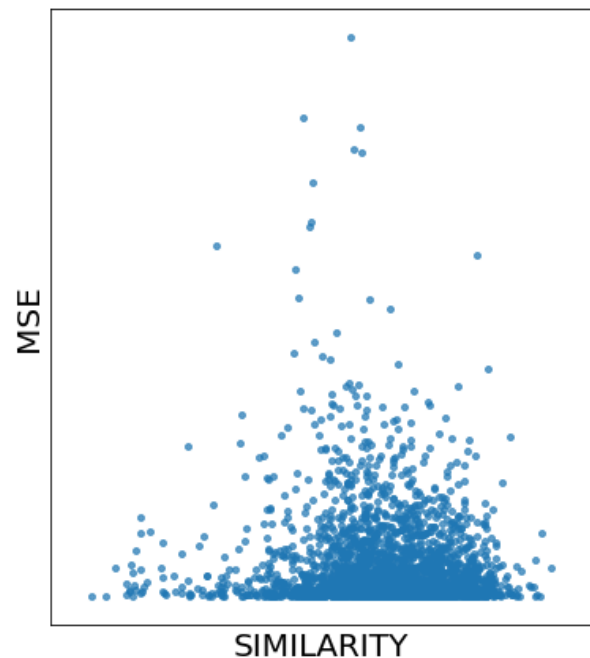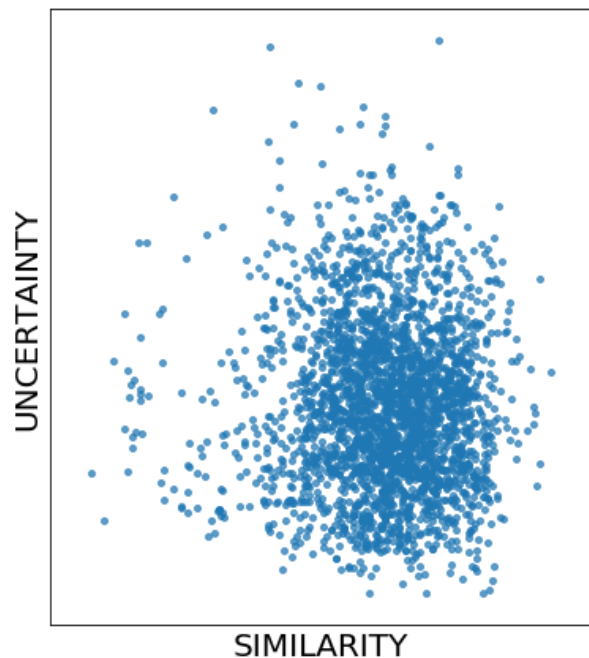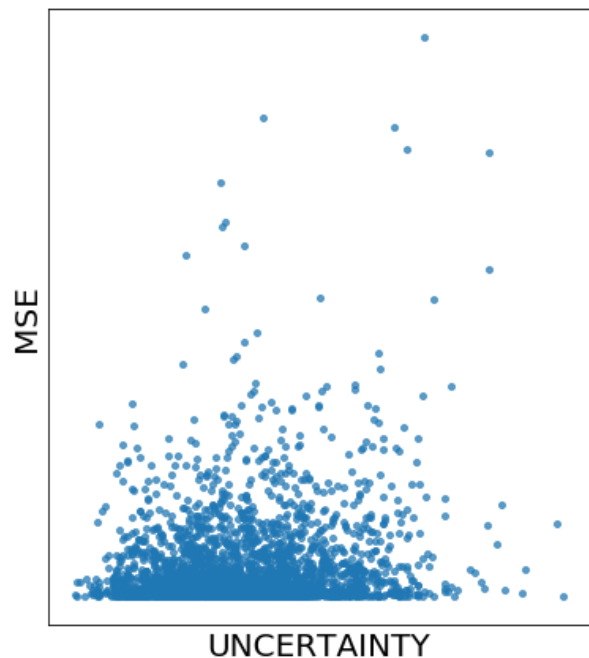

BAC

MACCSFP  
CHEMBL3155

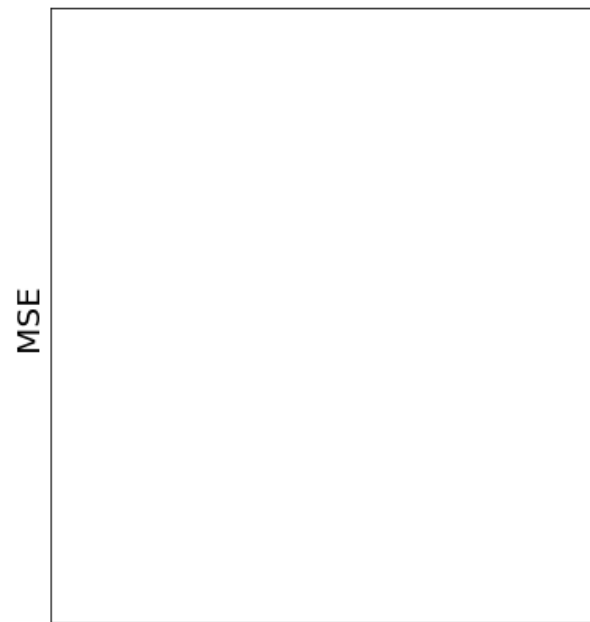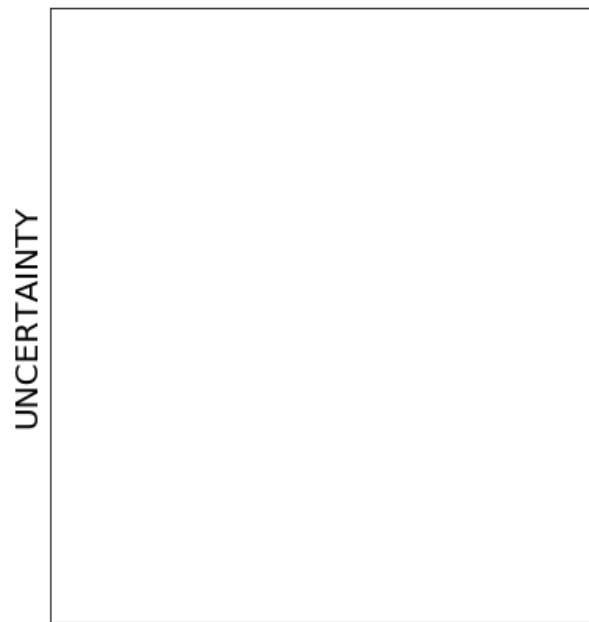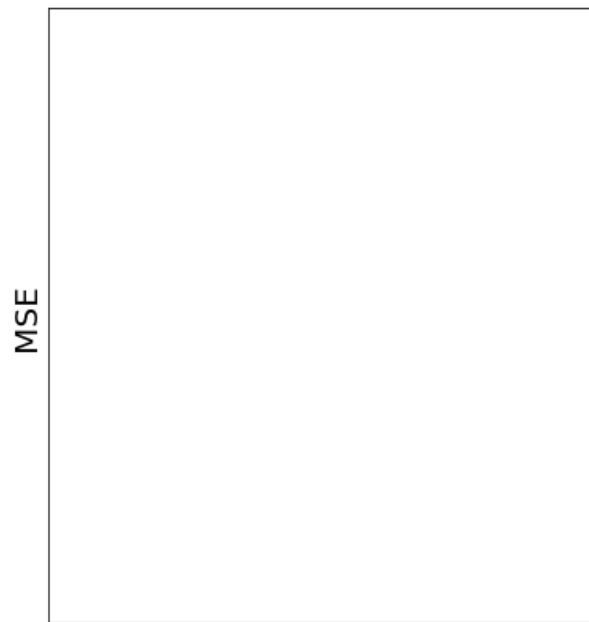

CV

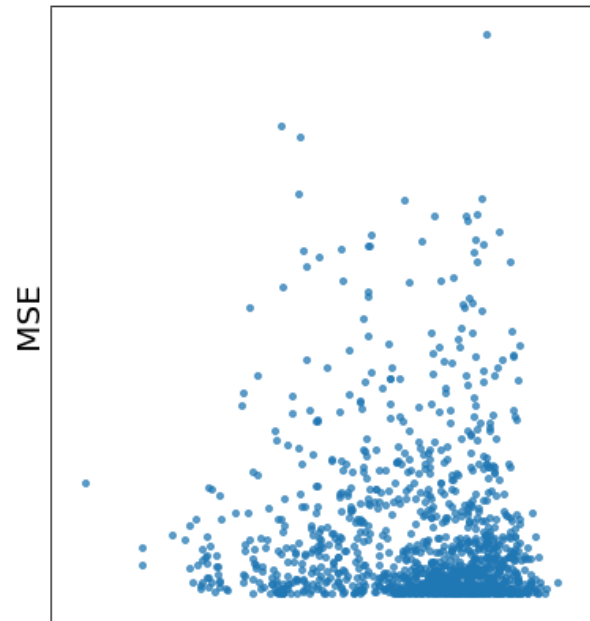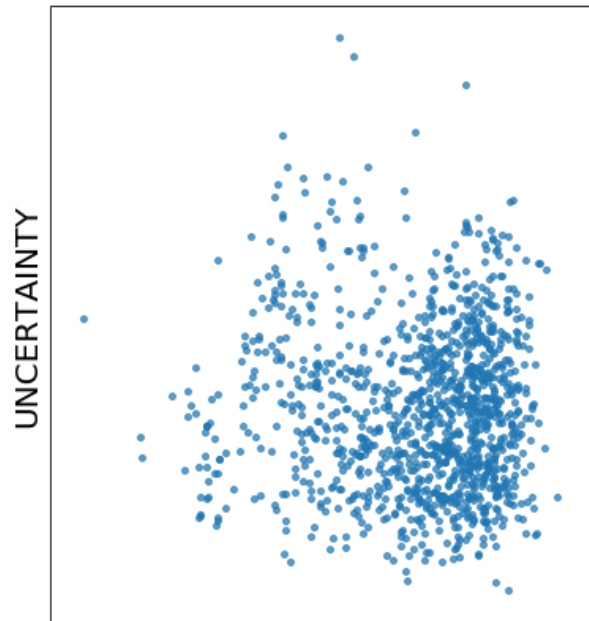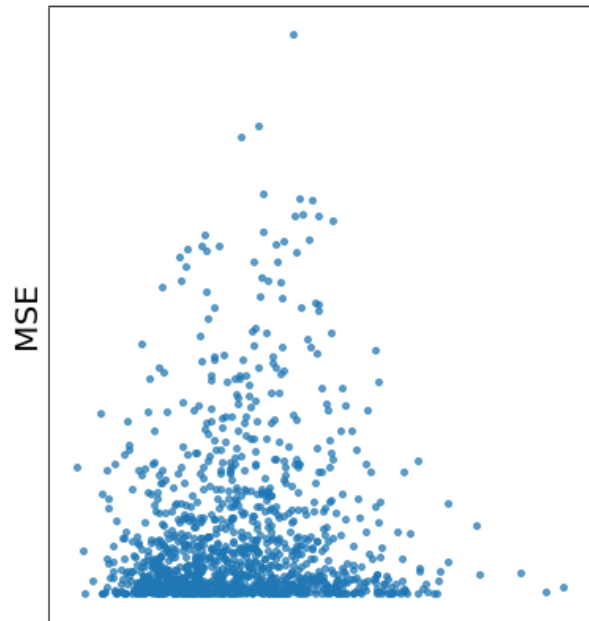

BAC



MACCSFP  
CHEMBL3371

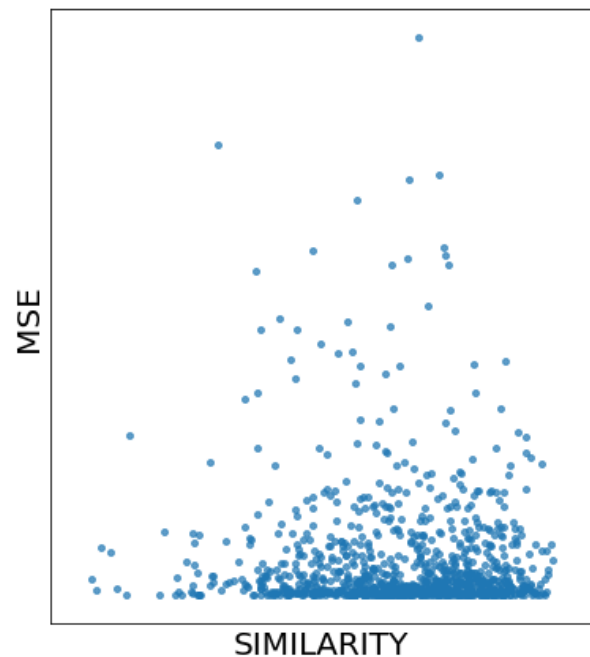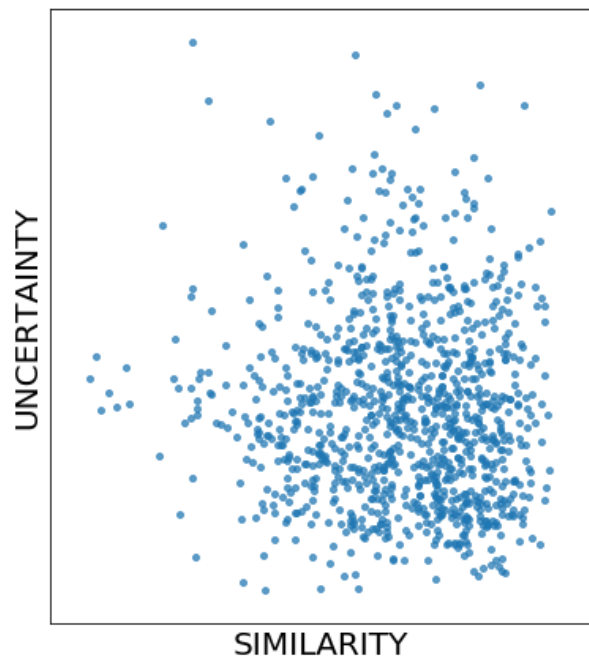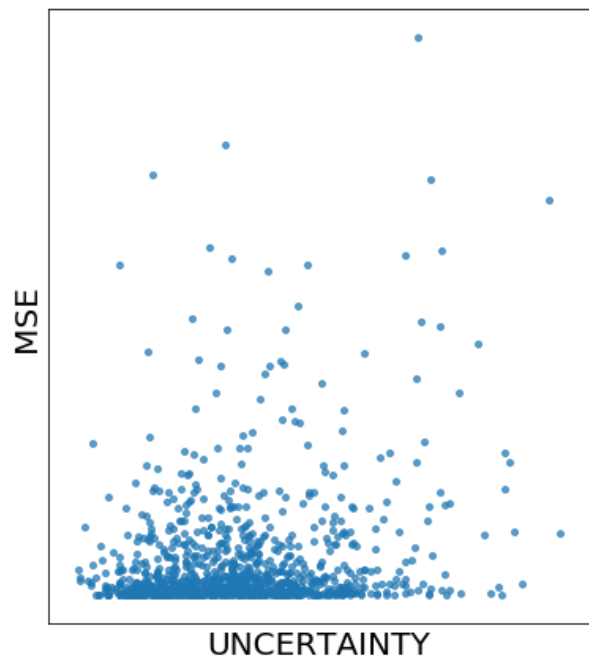

CV

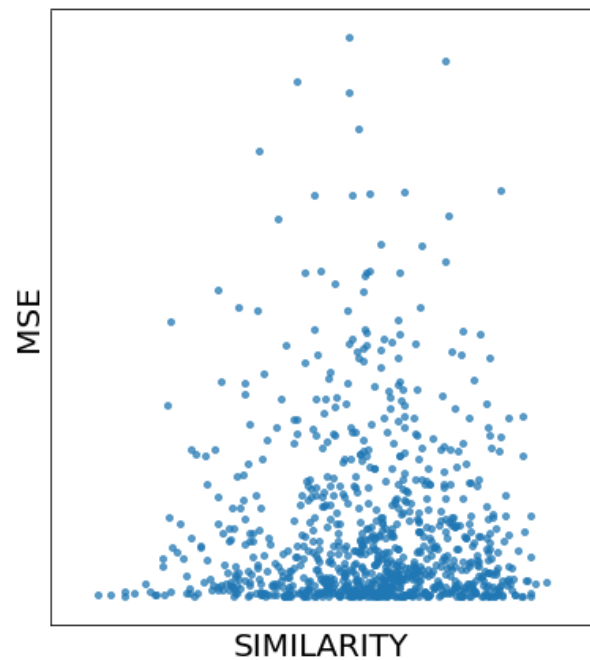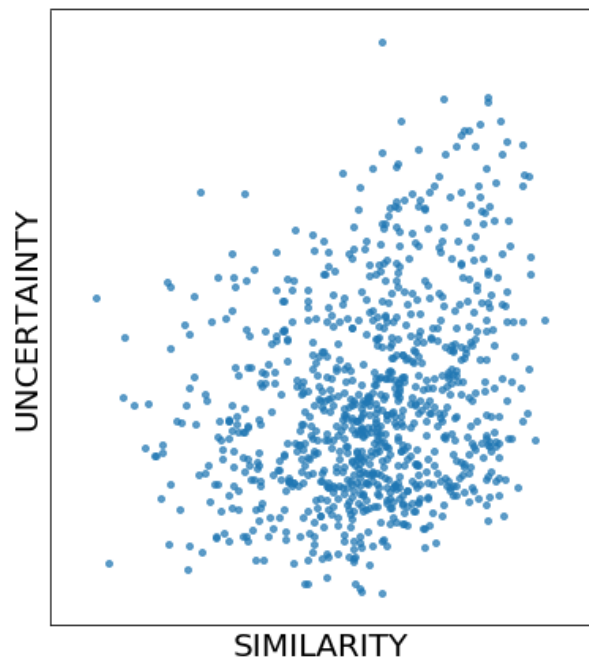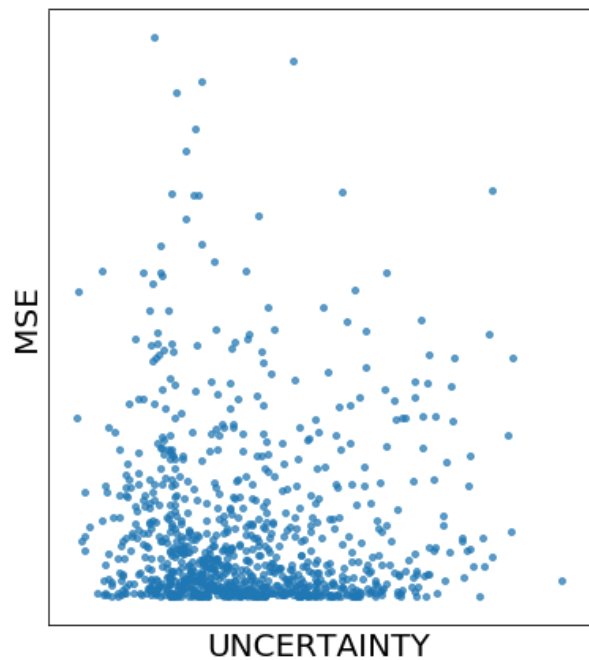

BAC

MACCSFP  
CHEMBL1945

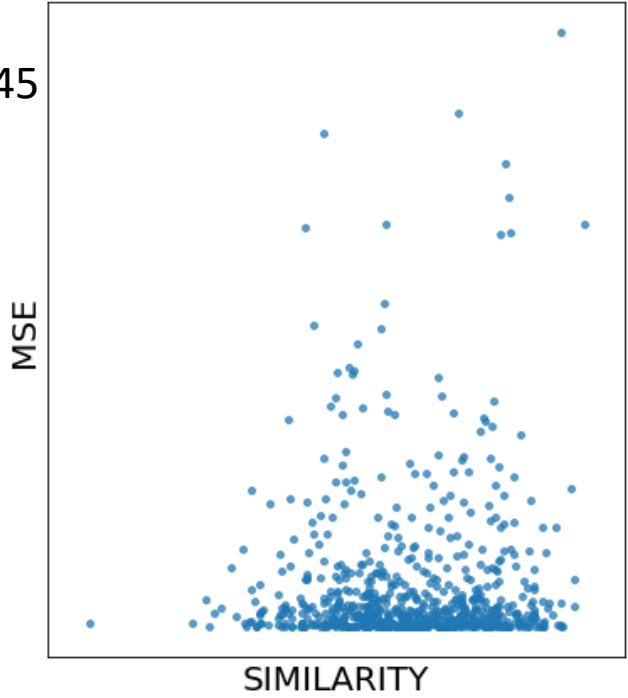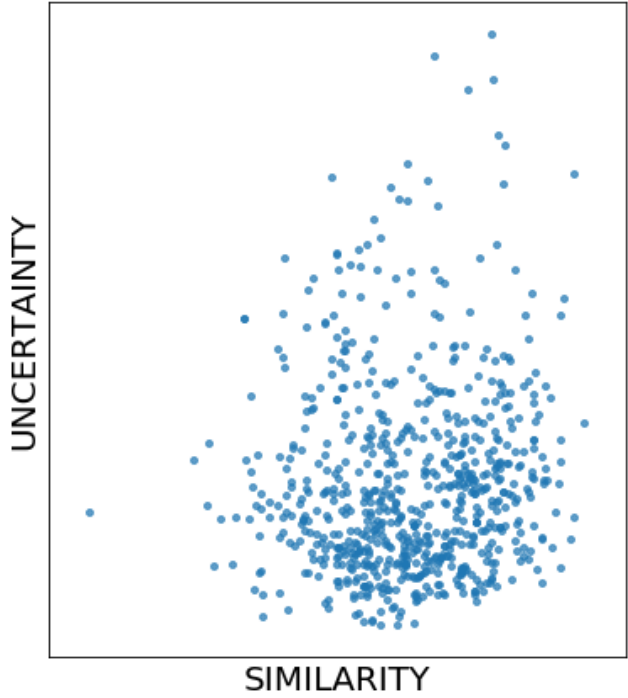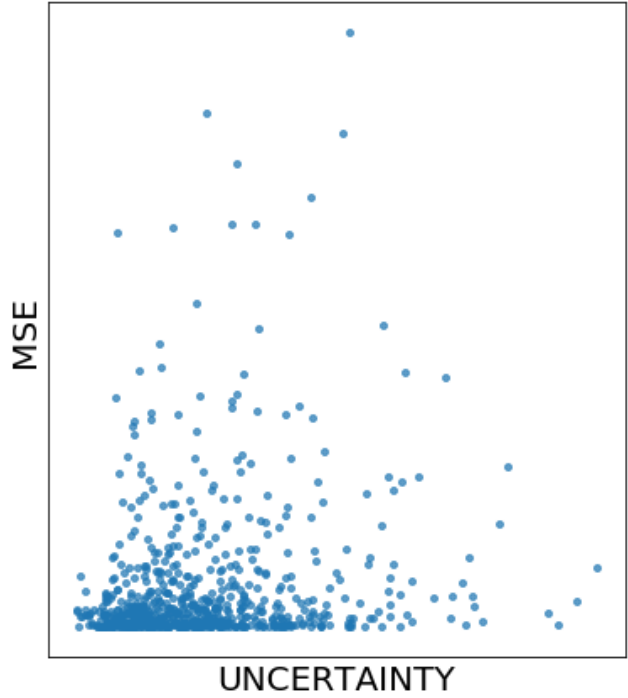

CV

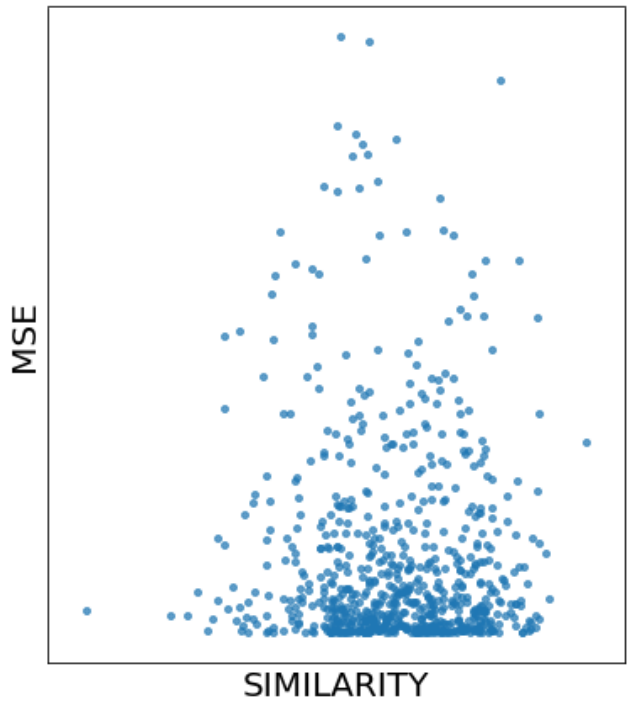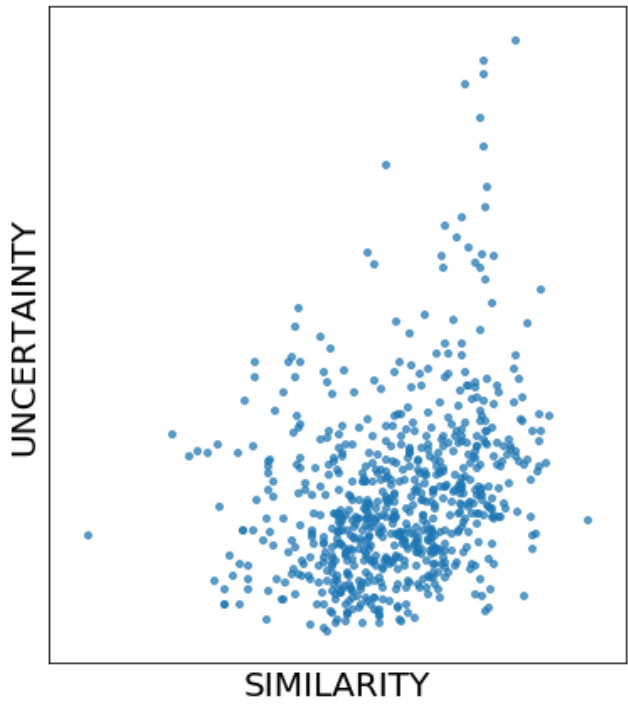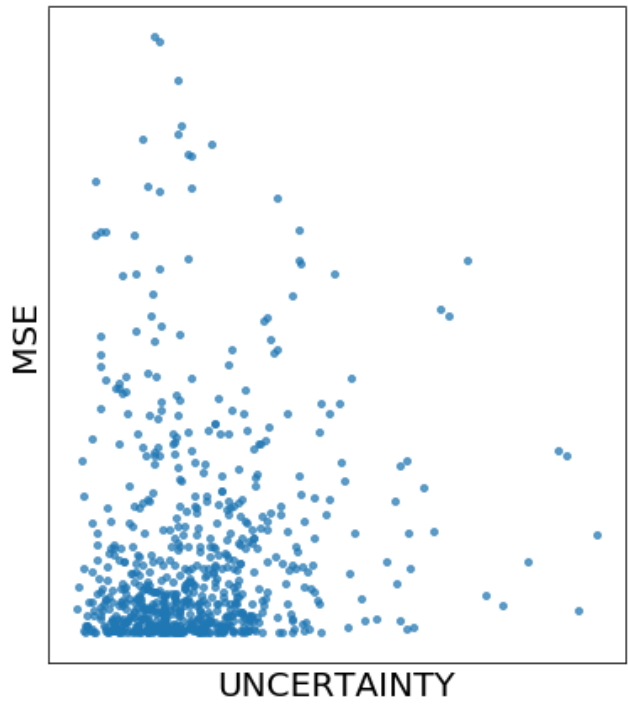

BAC

MACCSFP  
CHEMBL1946

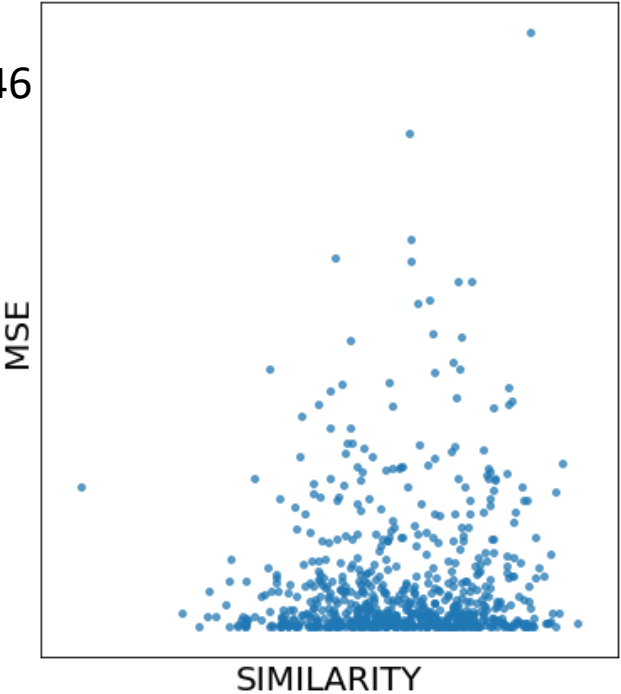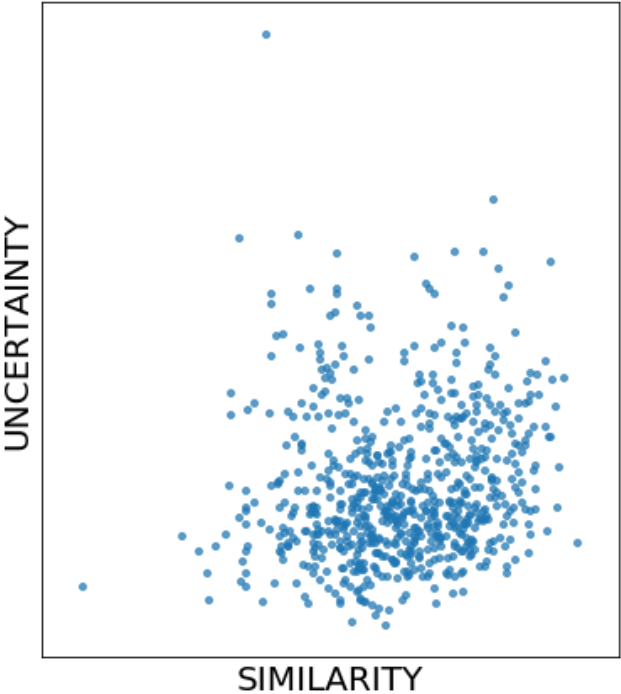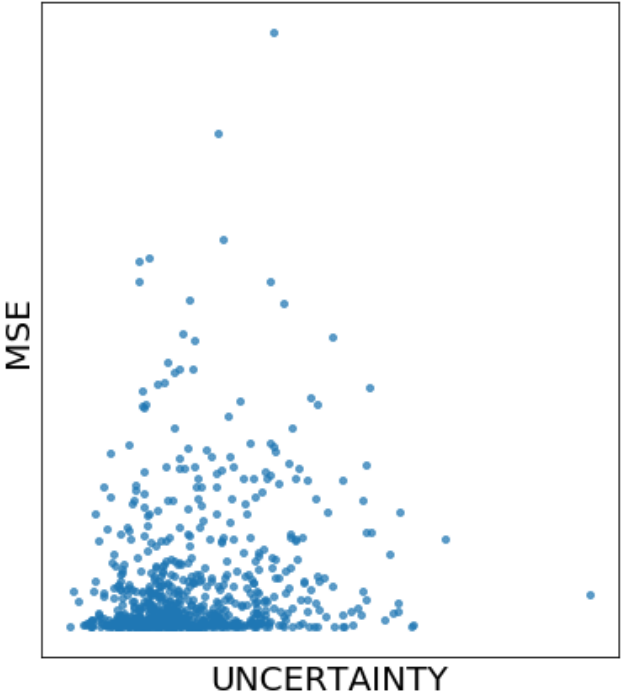

CV

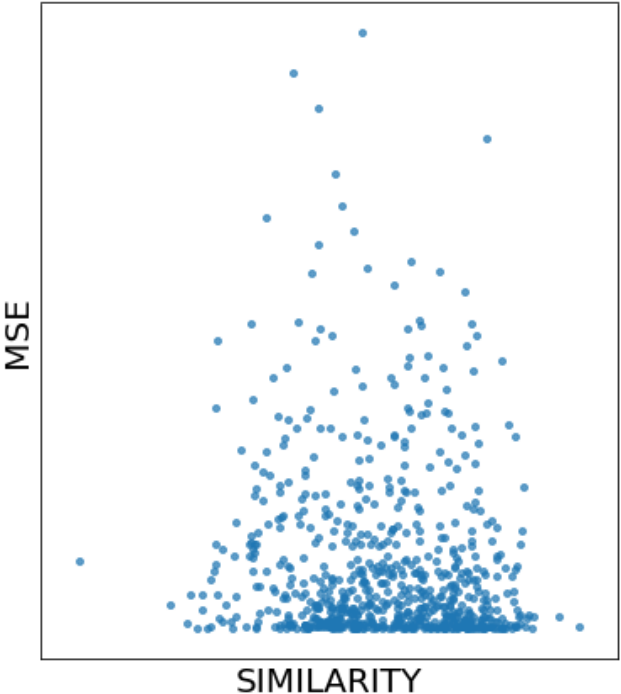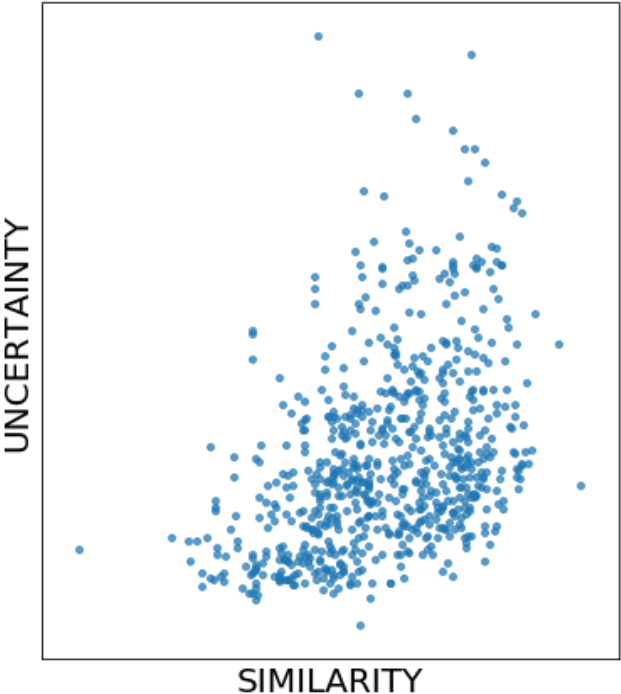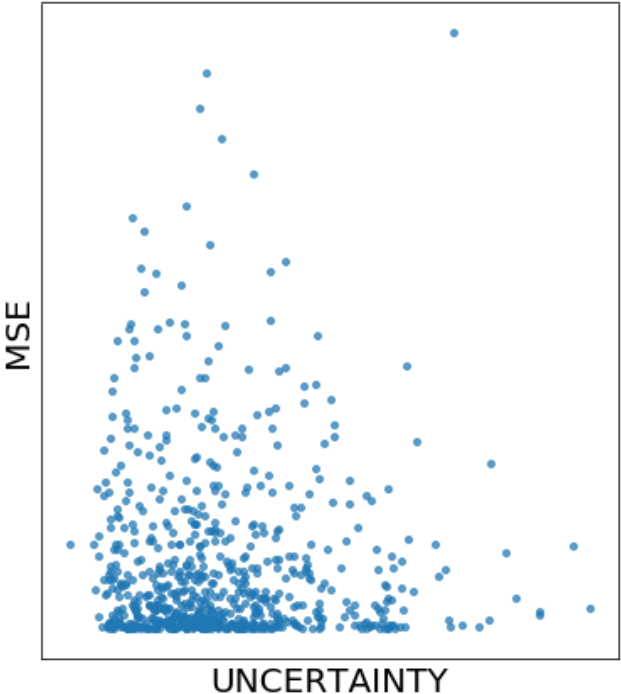

BAC

MACCSFP  
CHEMBL218

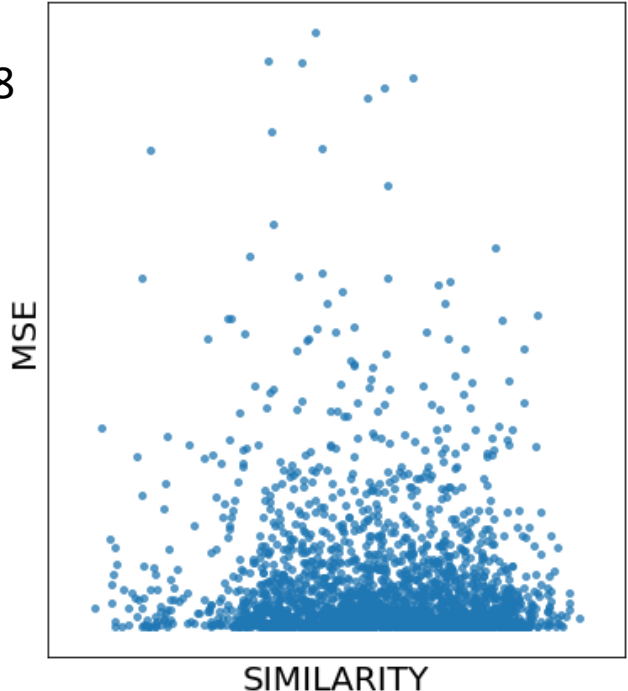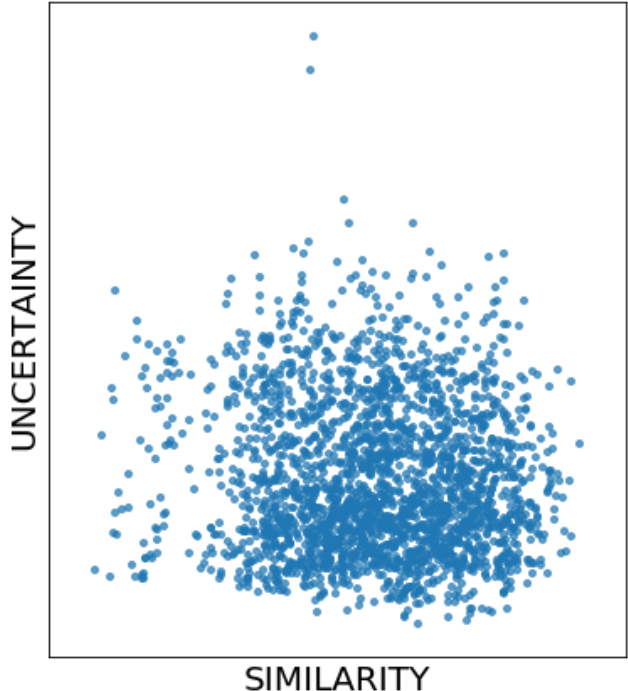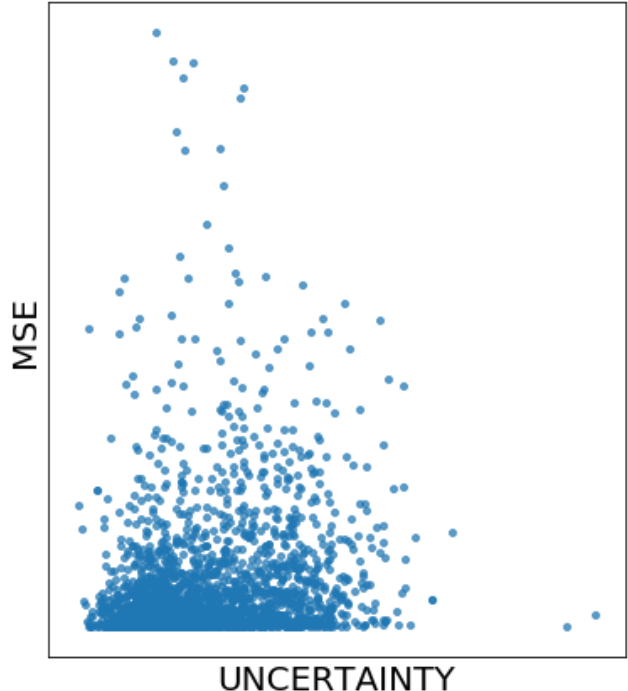

CV

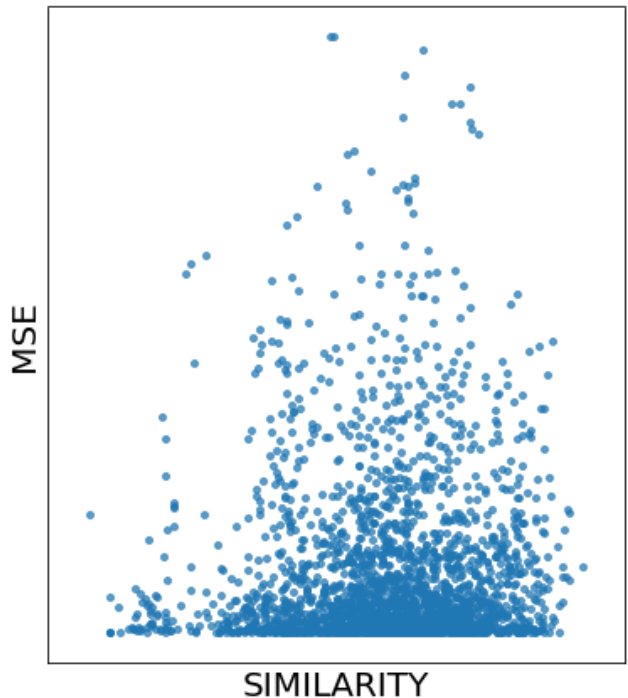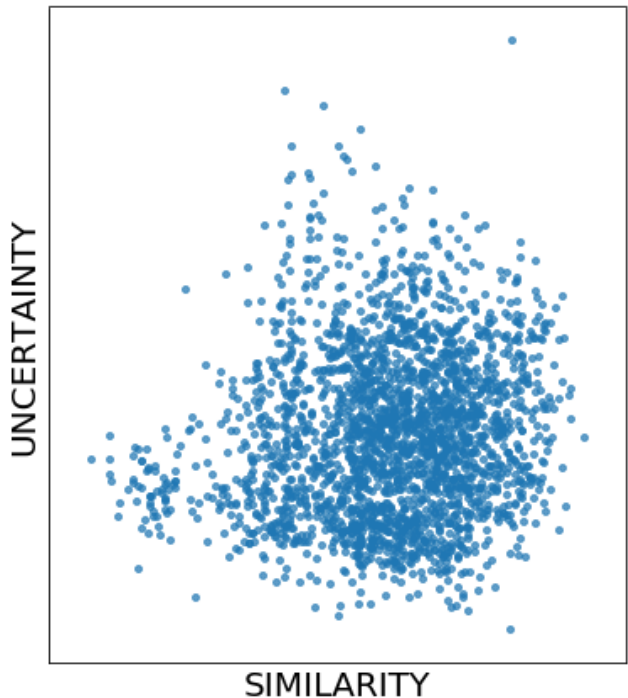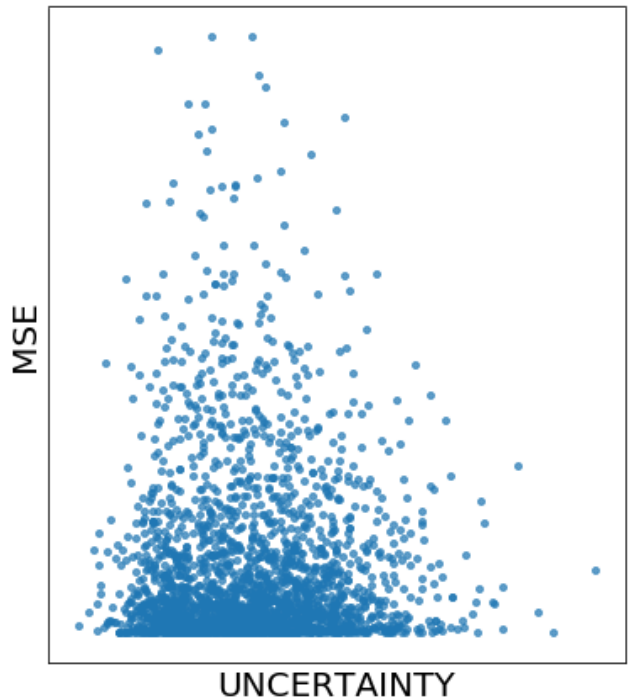

BAC

MACCSFP  
CHEMBL233

MSE

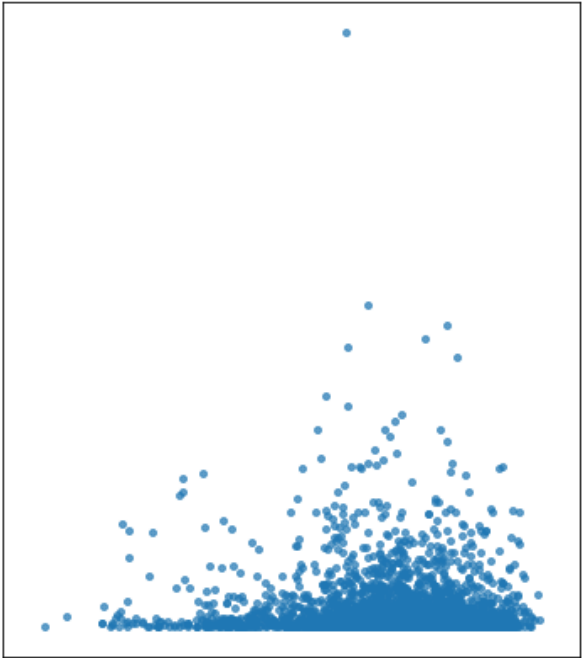

SIMILARITY

UNCERTAINTY

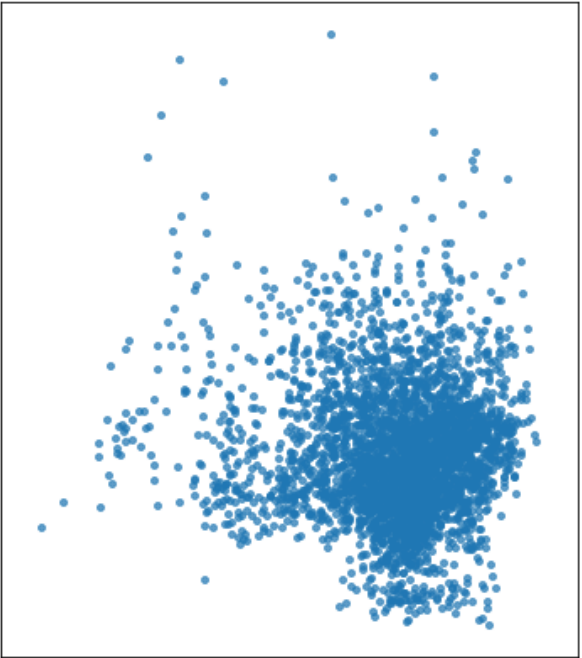

SIMILARITY

MSE

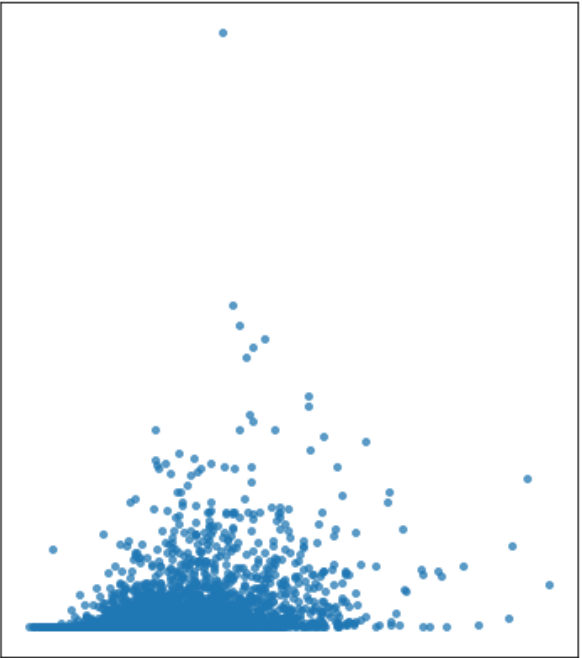

UNCERTAINTY

CV

MSE

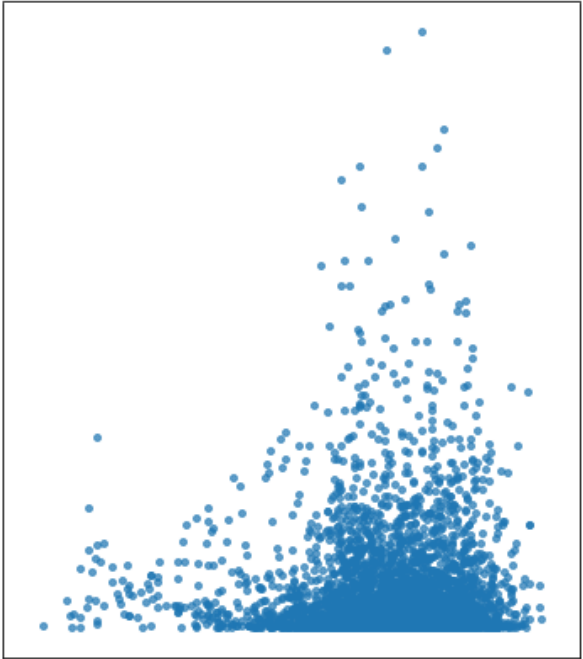

SIMILARITY

UNCERTAINTY

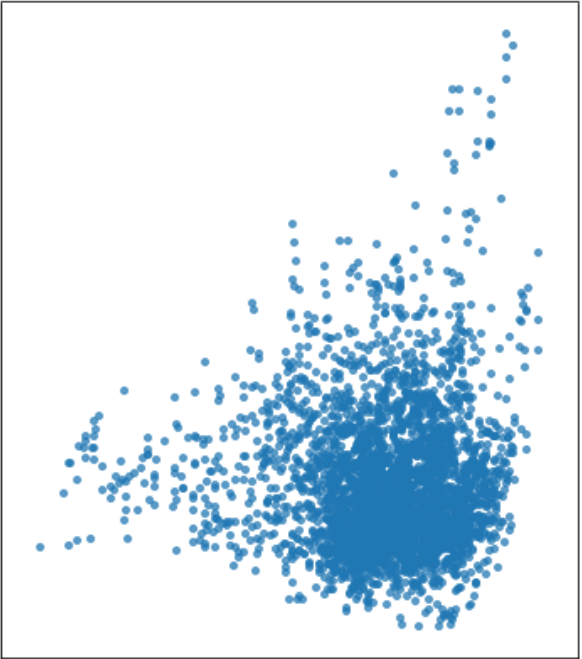

SIMILARITY

MSE

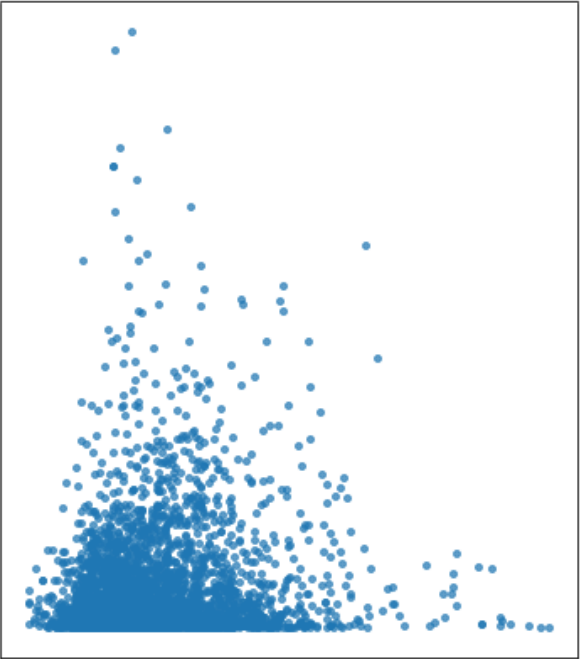

UNCERTAINTY

BAC



MACCSFP  
CHEMBL236

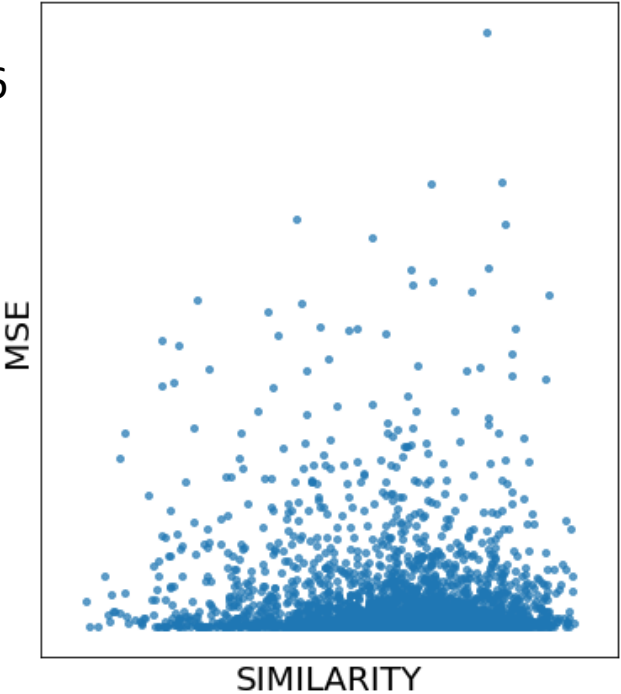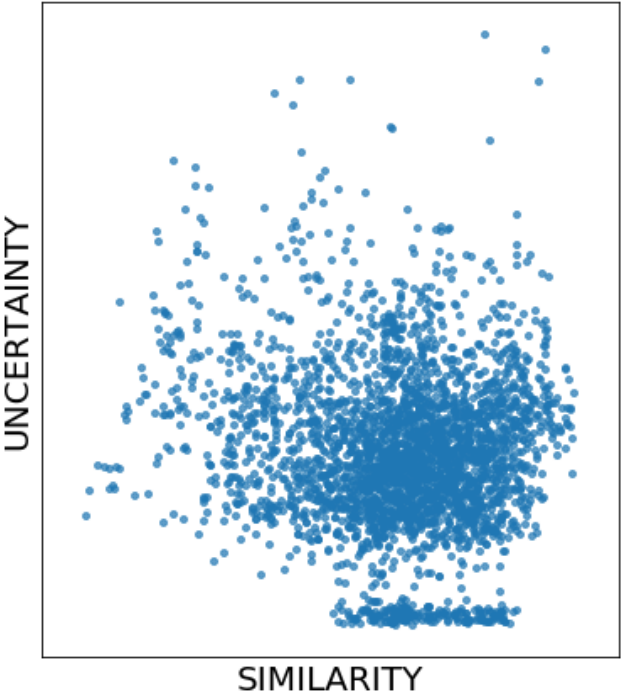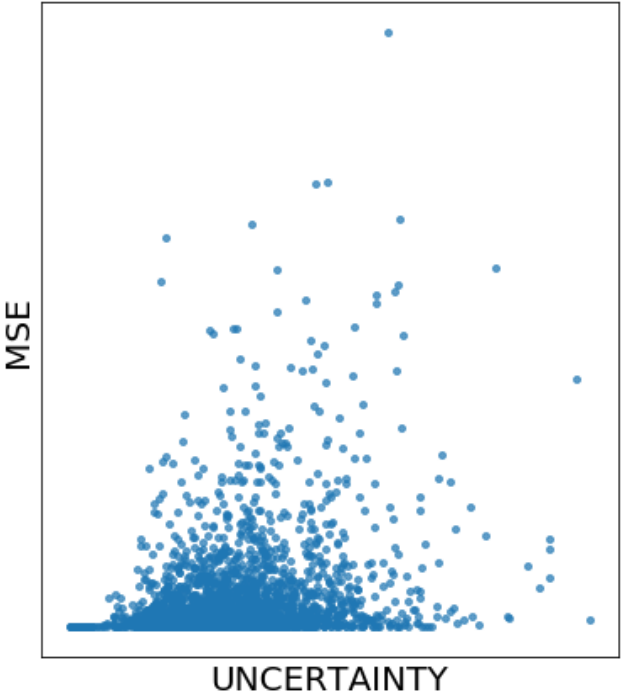

CV

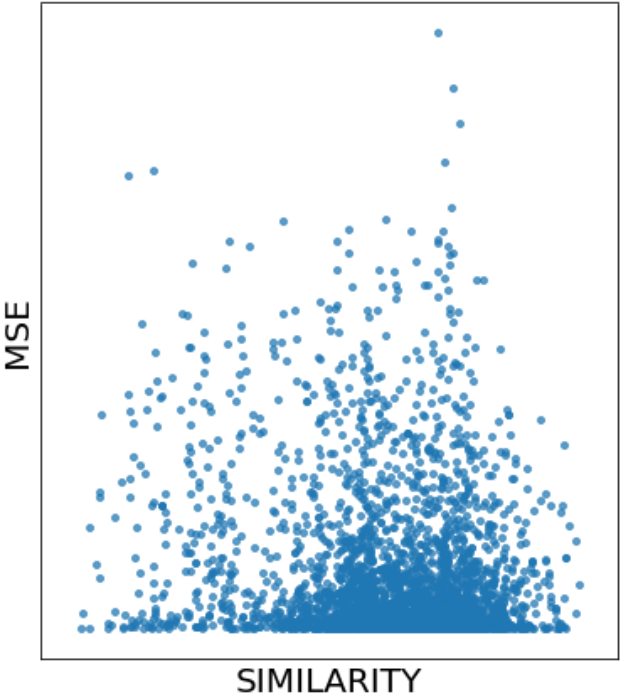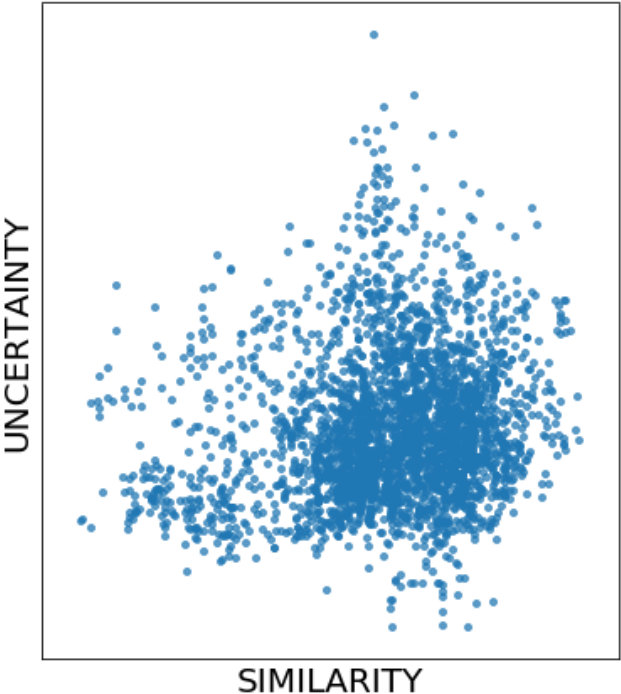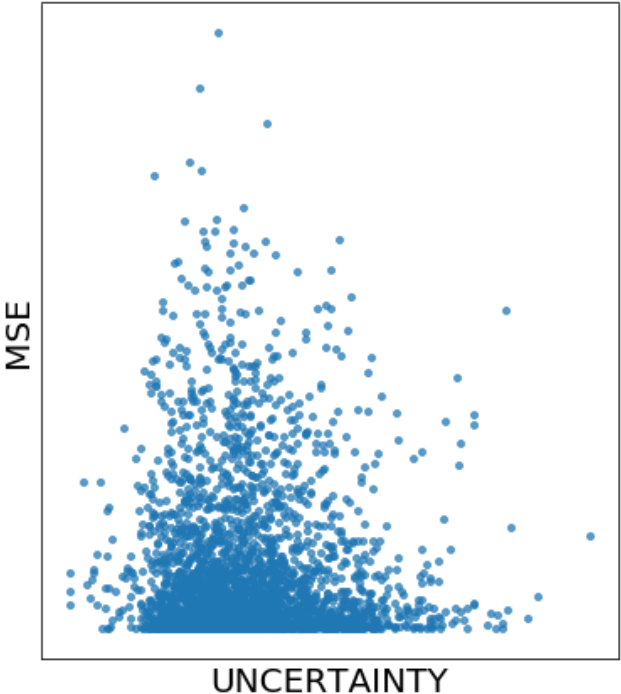

BAC



MACCSFP  
CHEMBL237

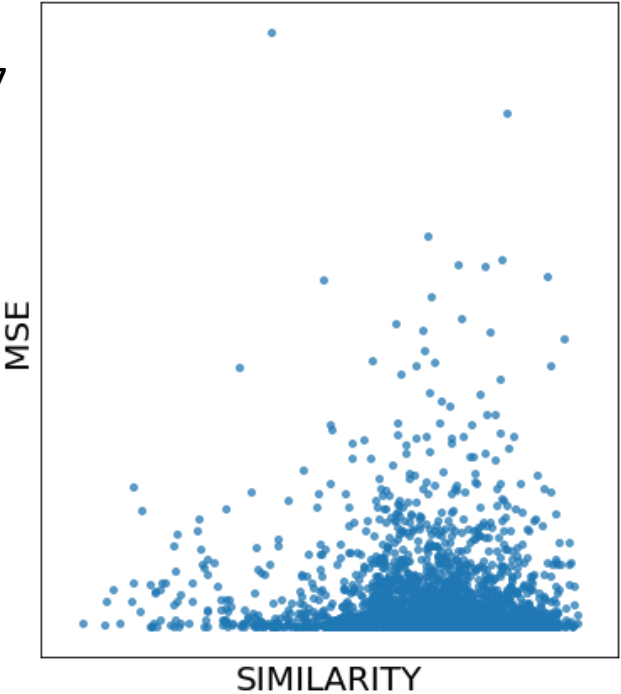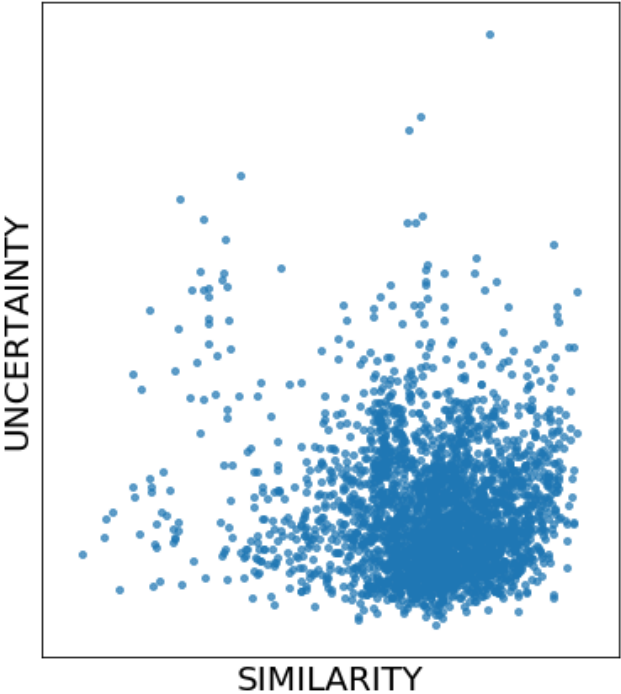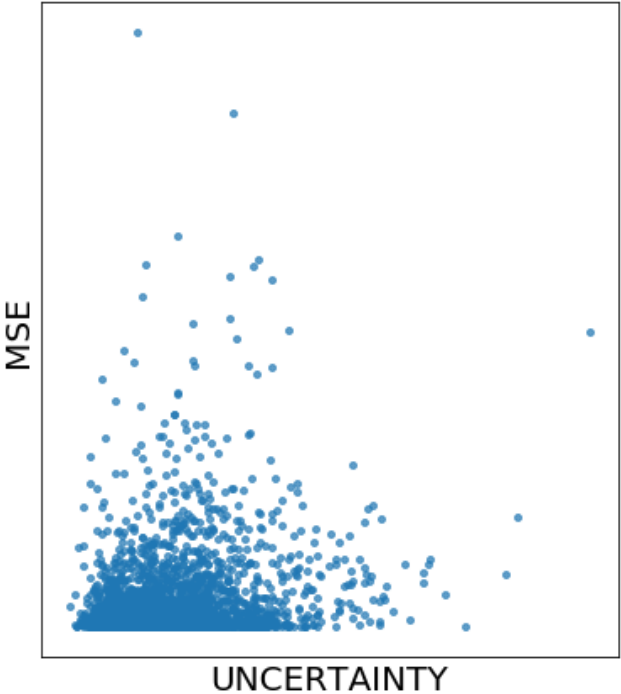

CV

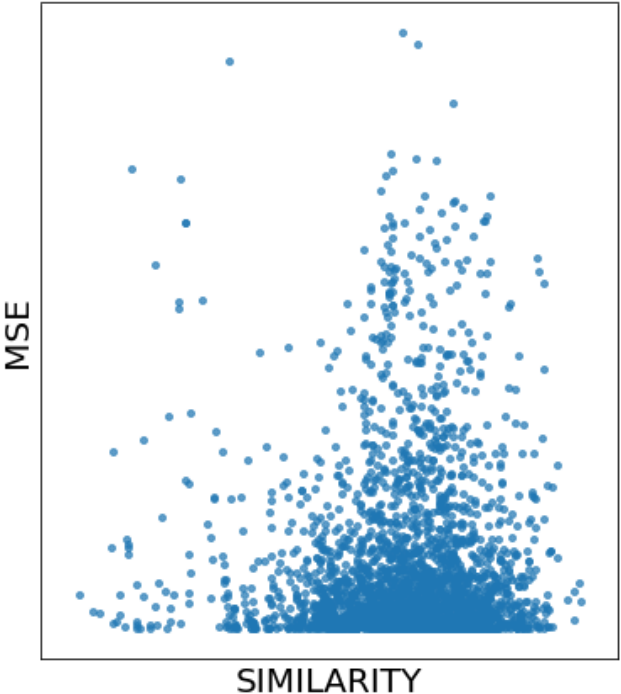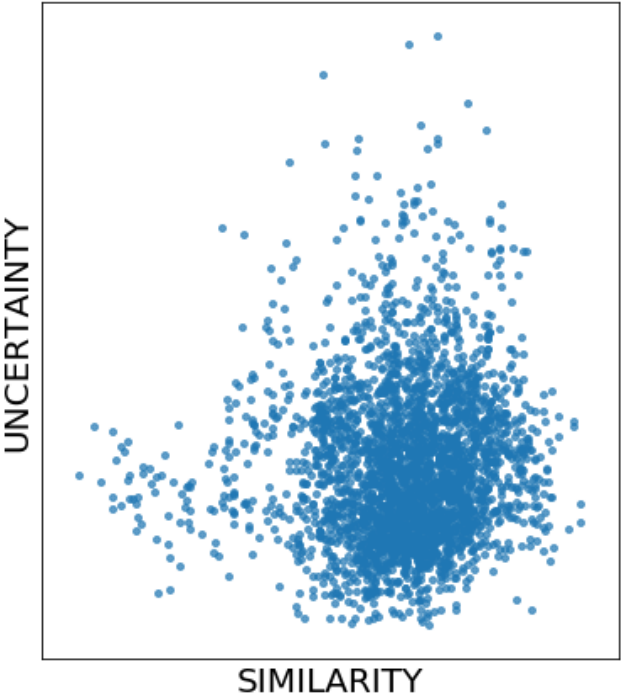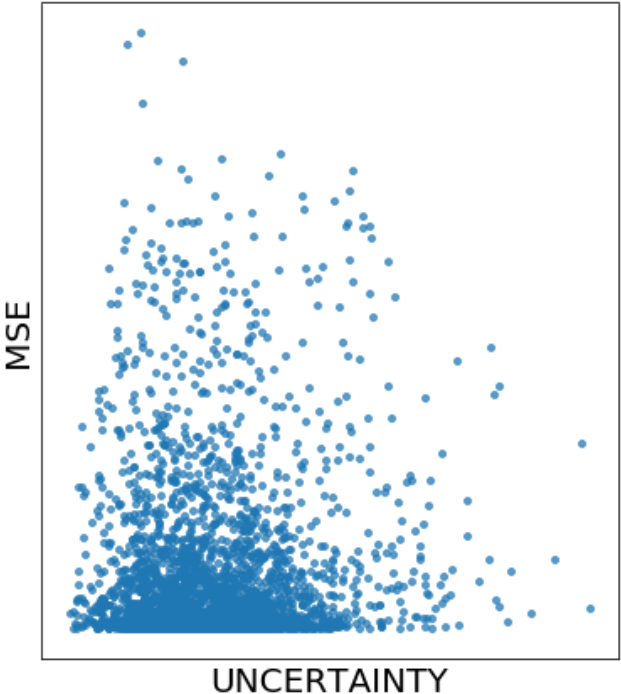

BAC

MACCSFP  
CHEMBL253

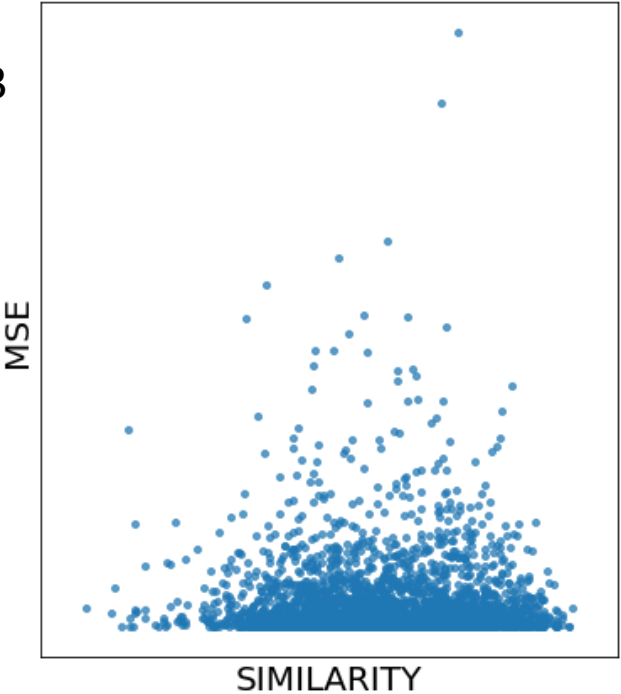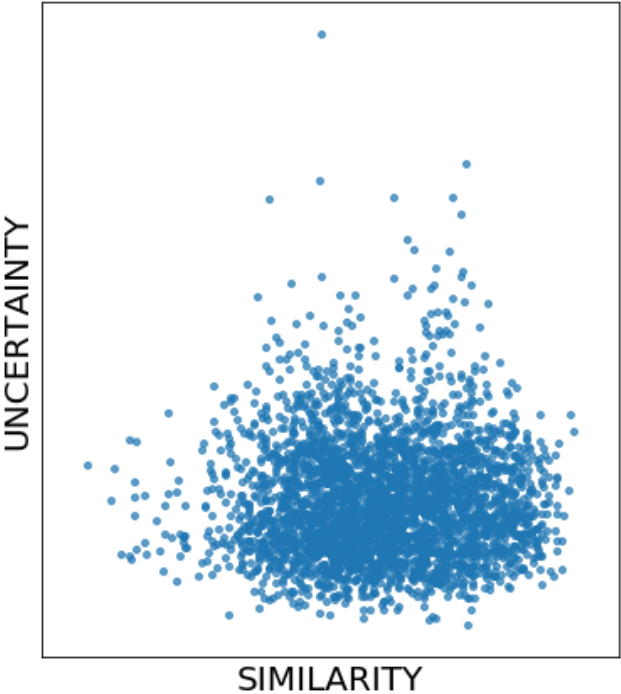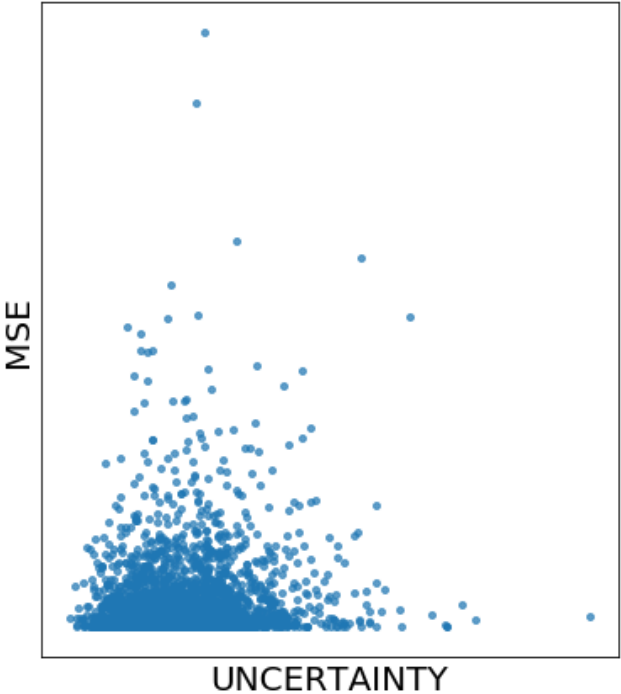

CV

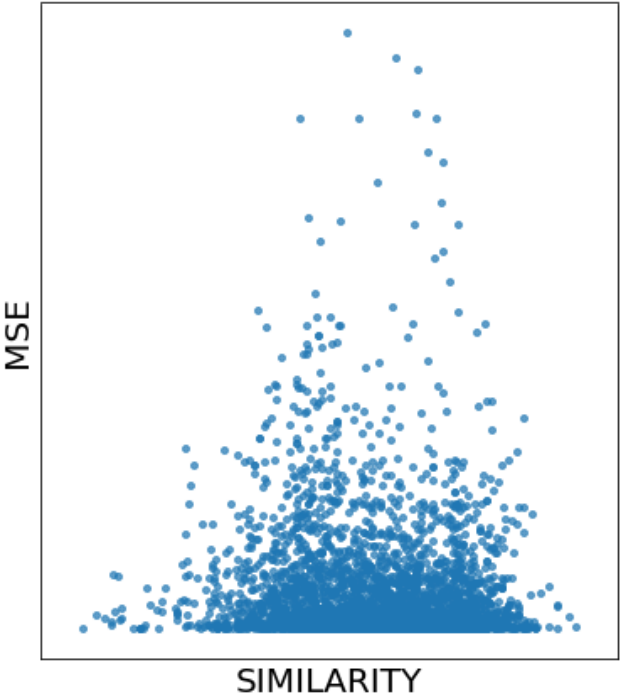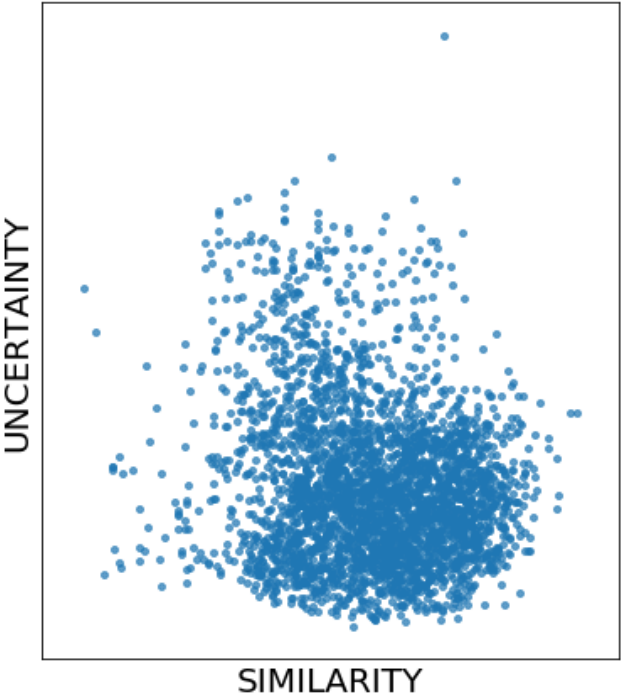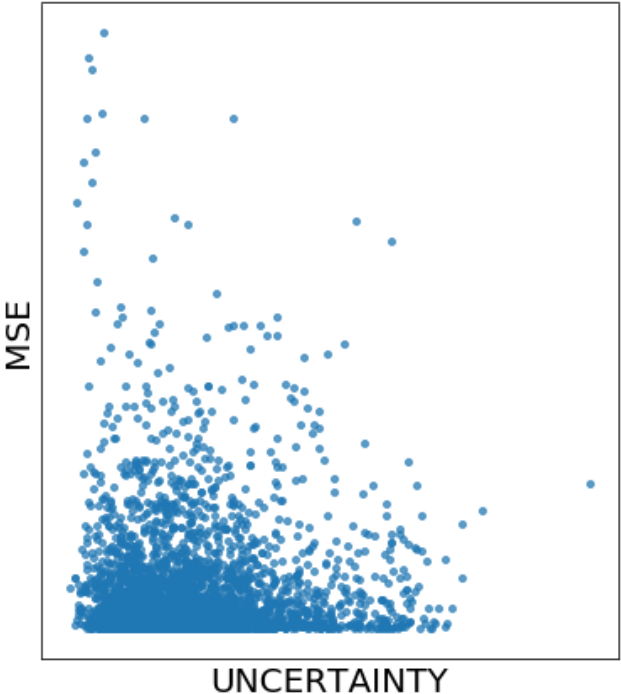

BAC

MACCSFP  
CHEMBL259

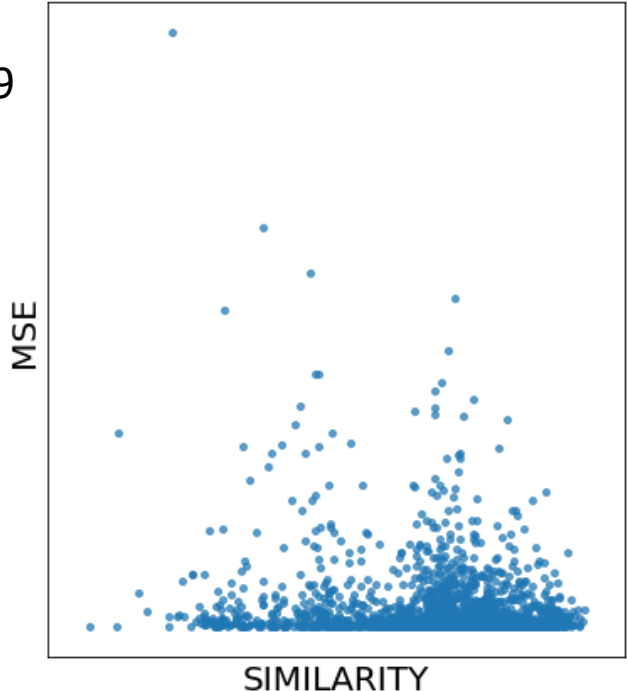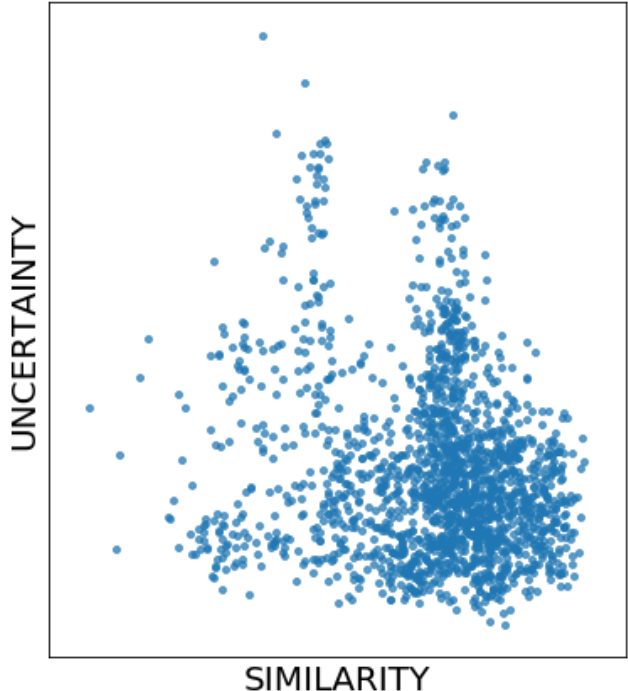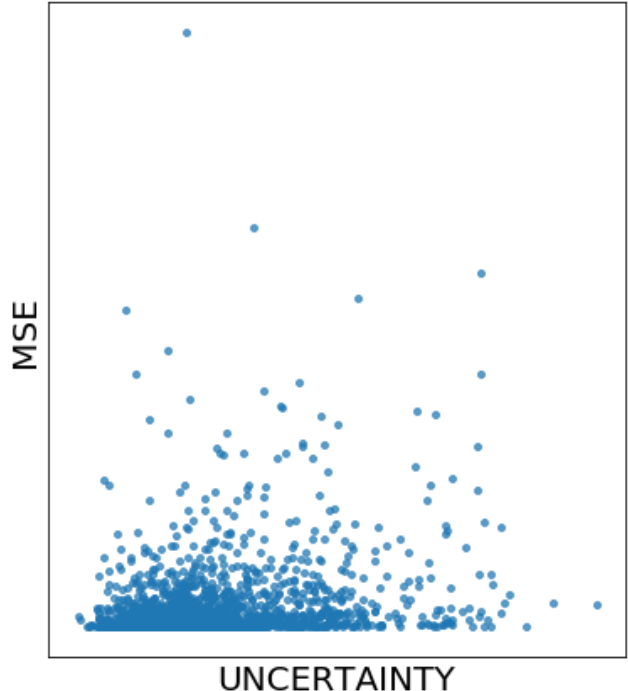

CV

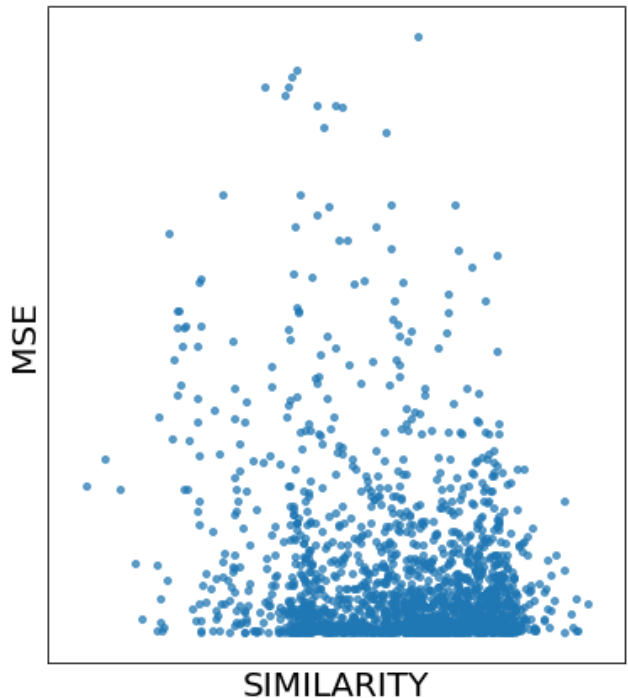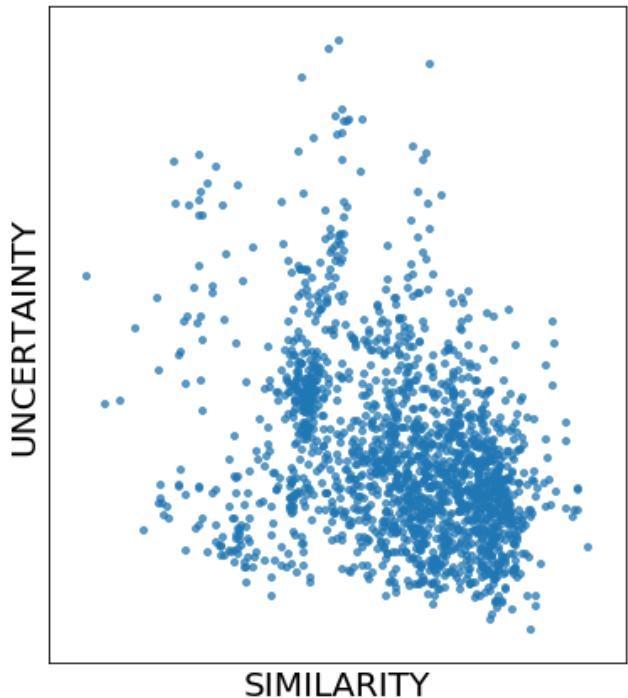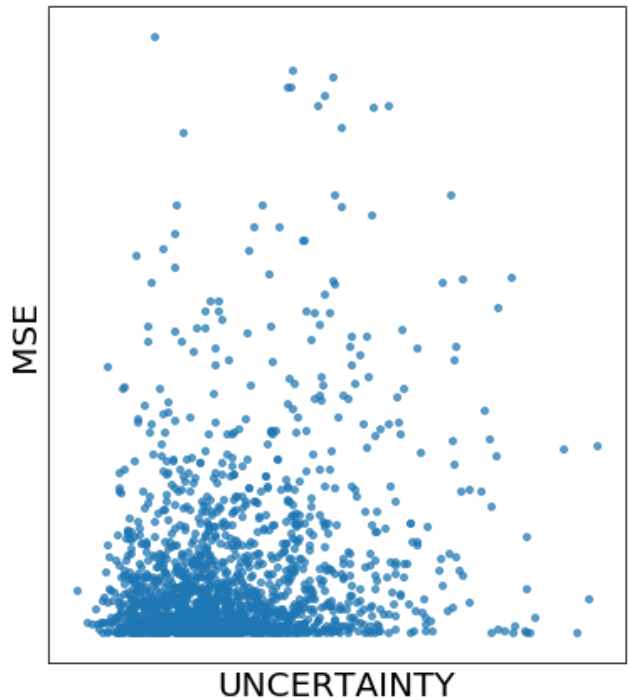

BAC

MACCSFP  
CHEMBL3227

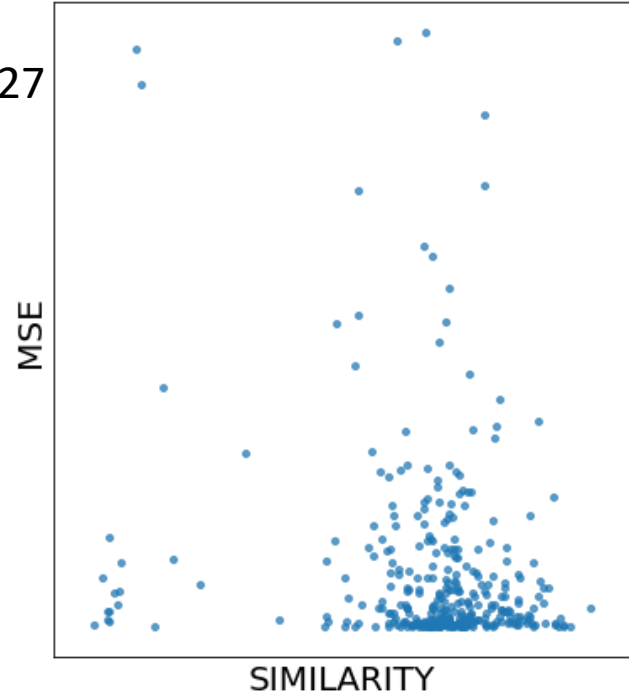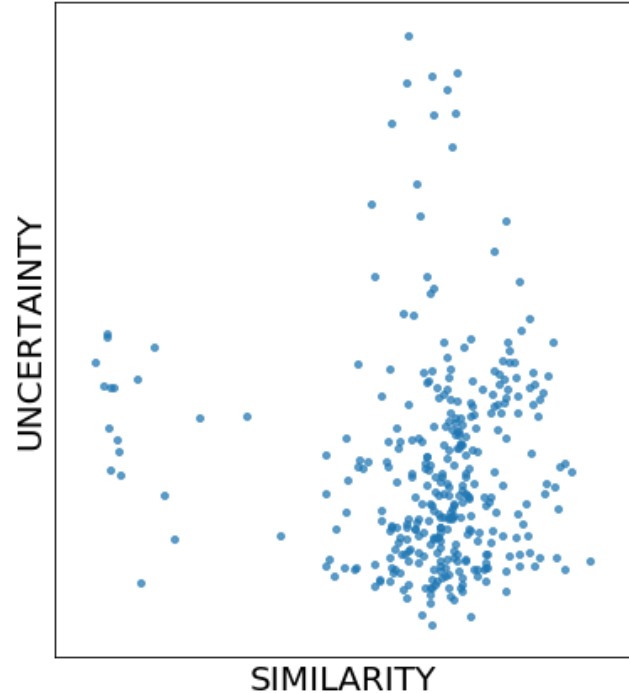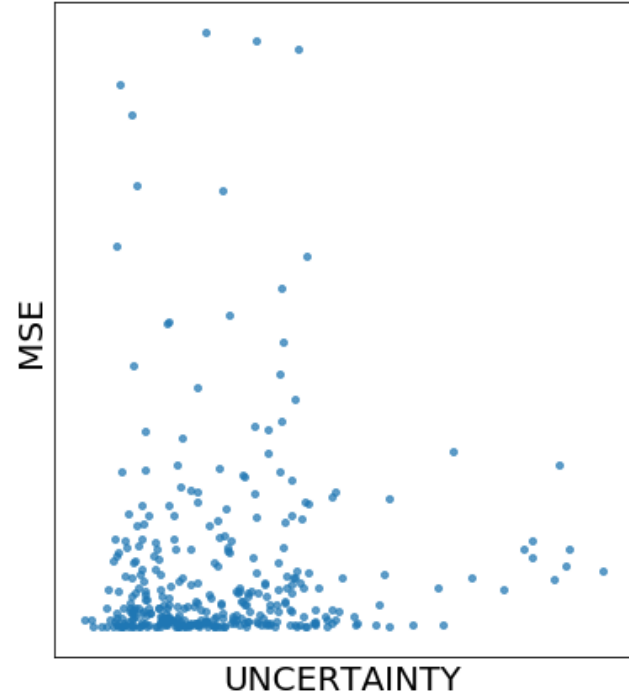

CV

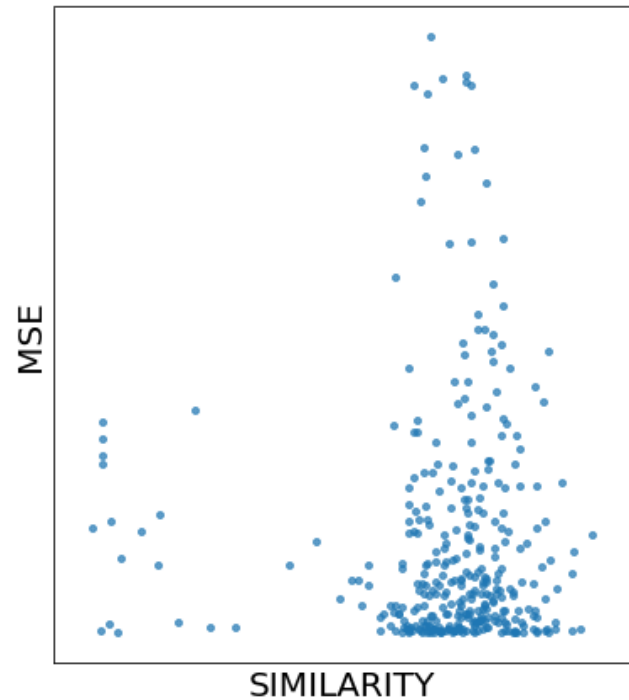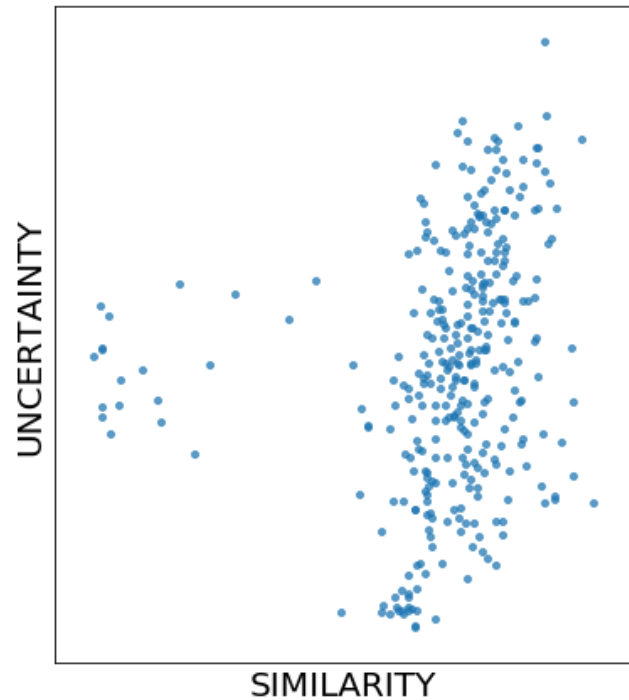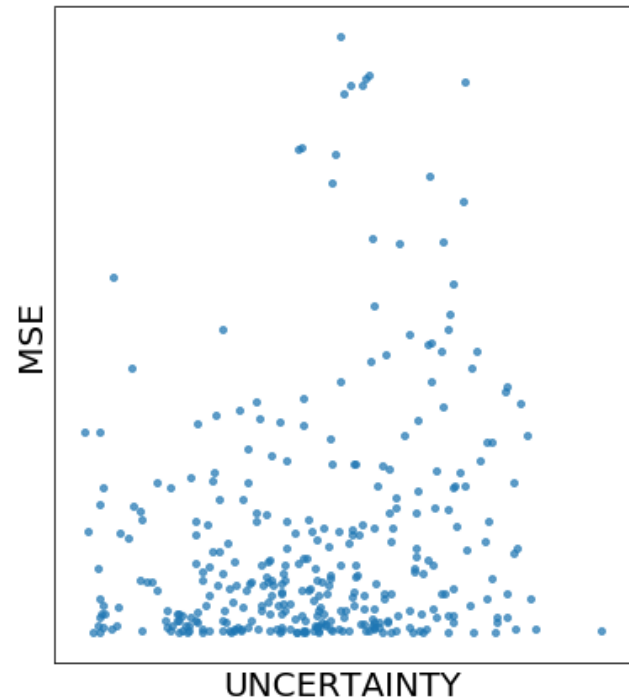

BAC

MACCSFP  
CHEMBL4015

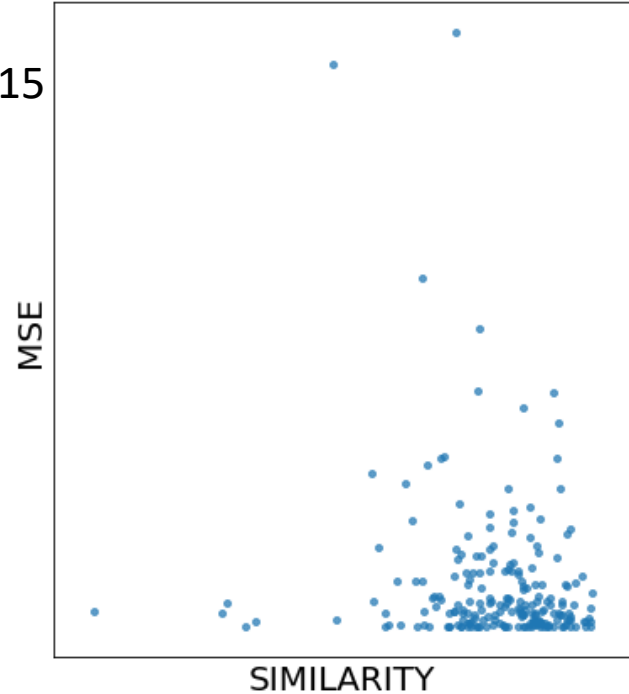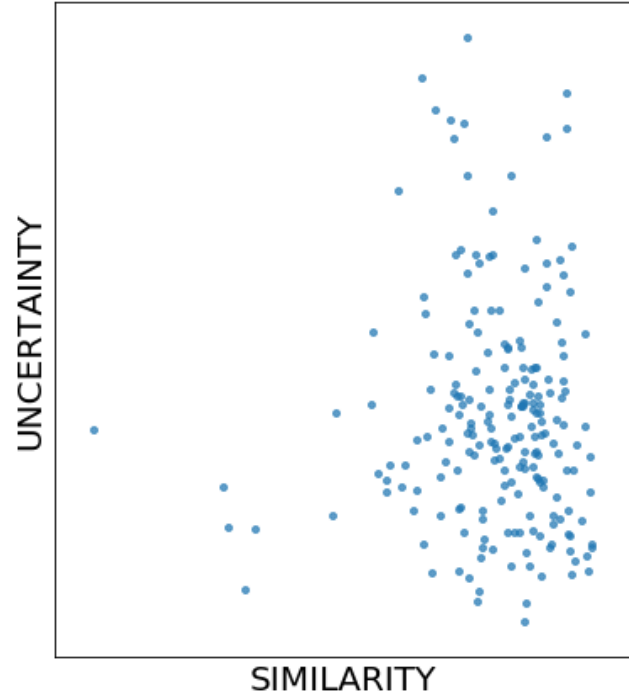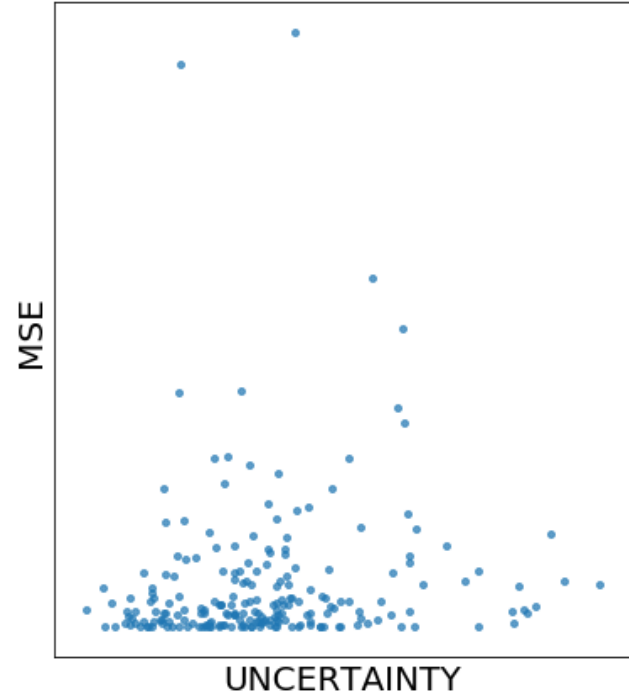

CV

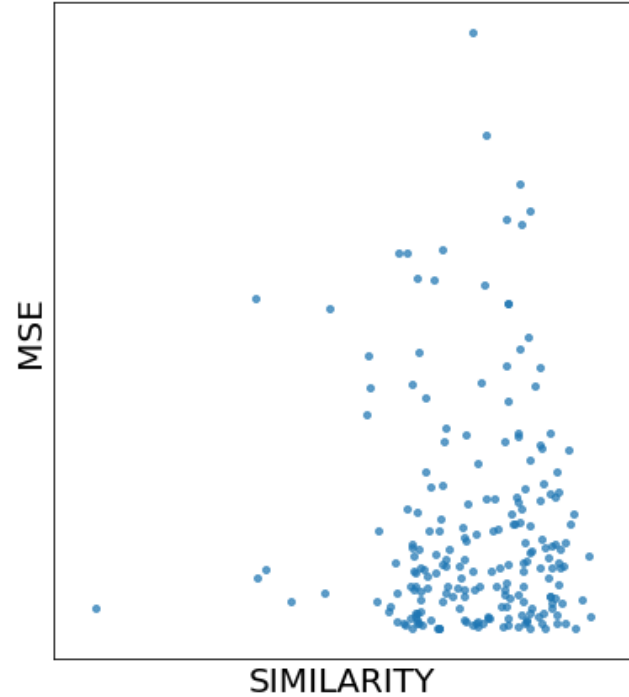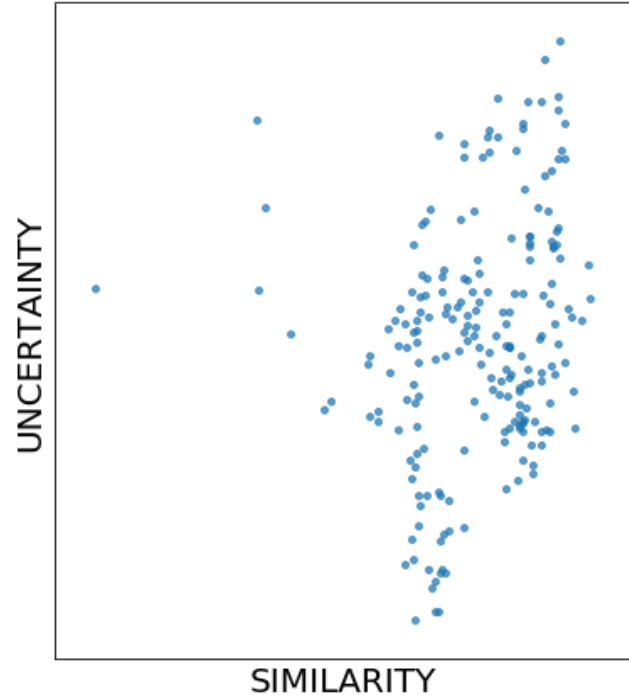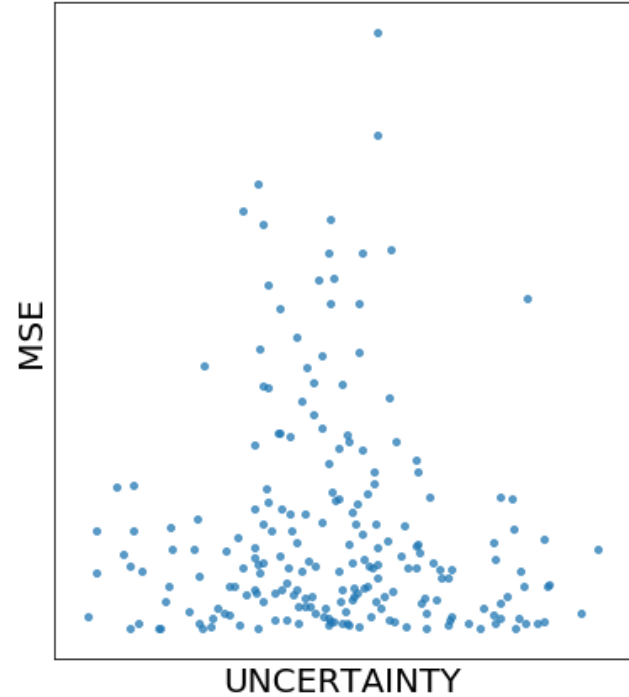

BAC

MACCSFP  
CHEMBL4308

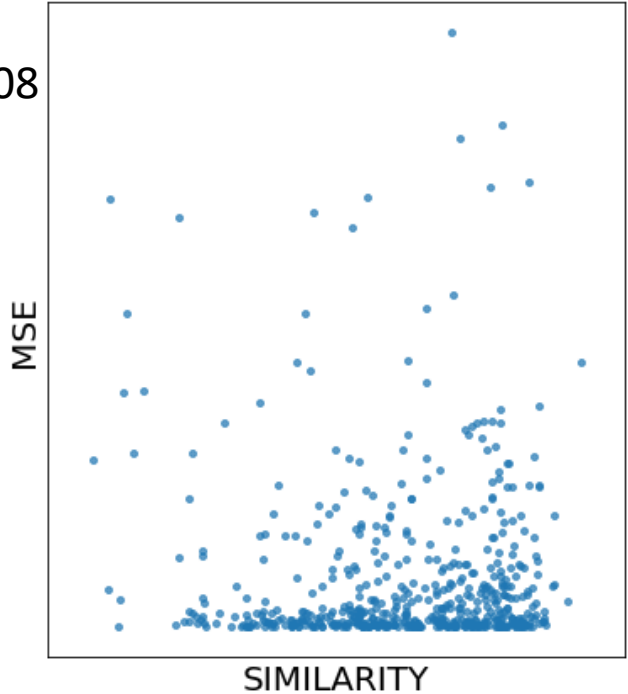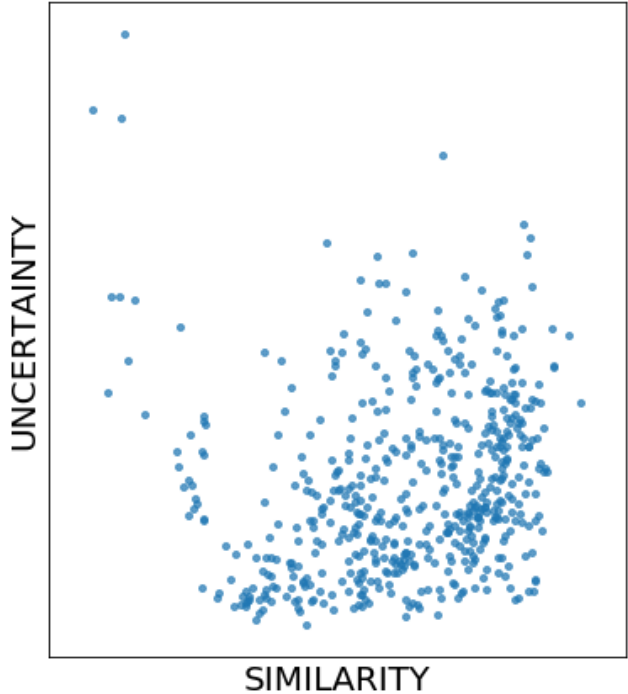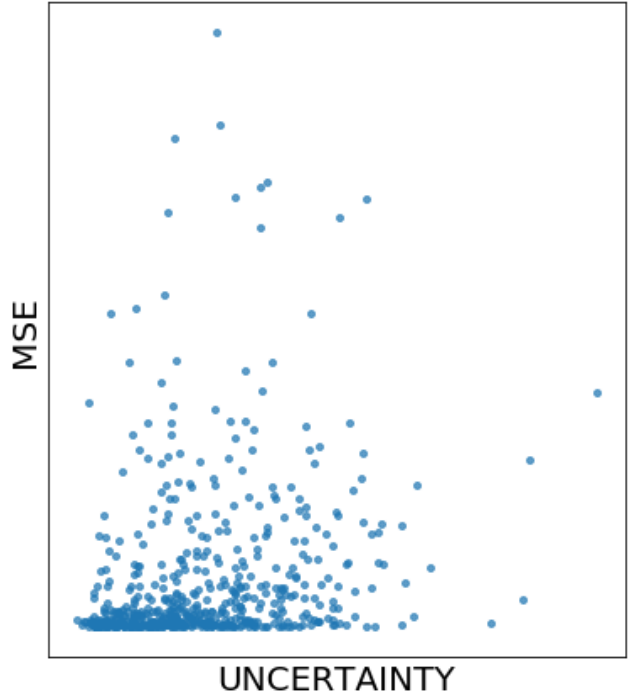

CV

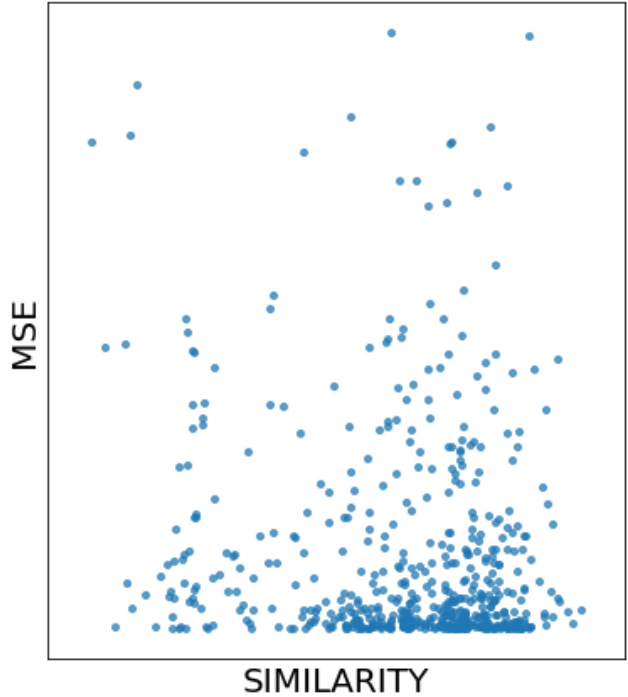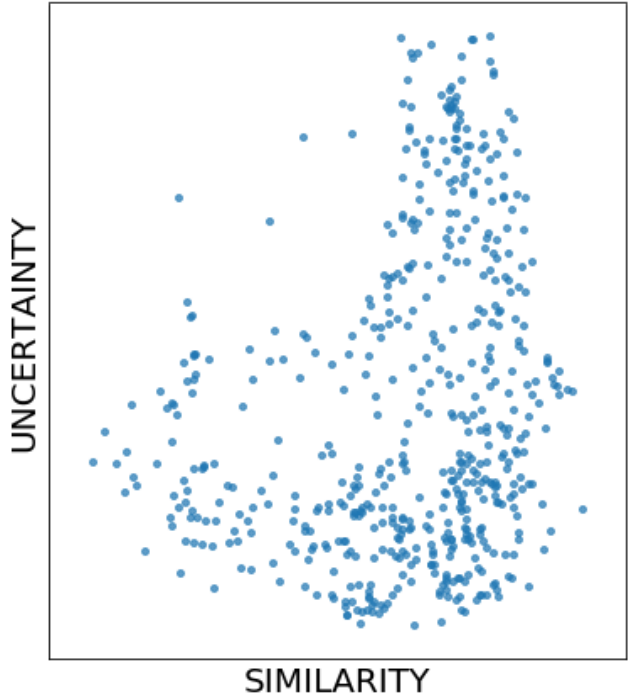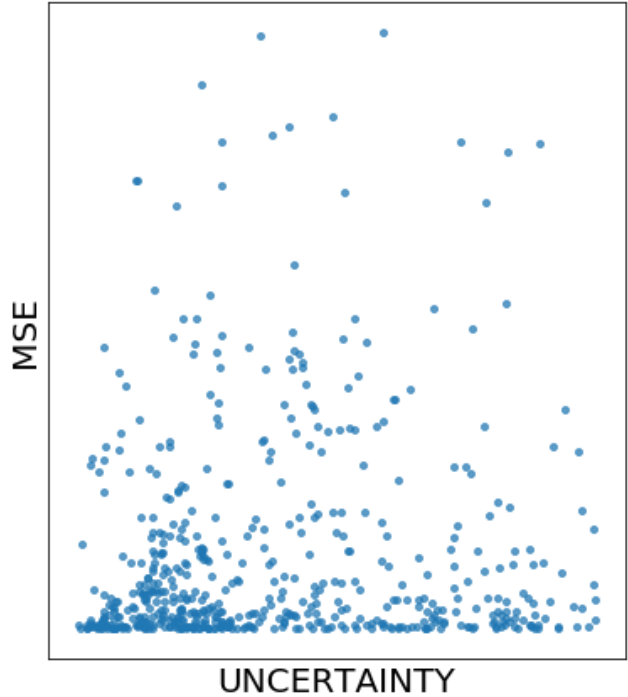

BAC



MACCSFP  
CHEMBL4608

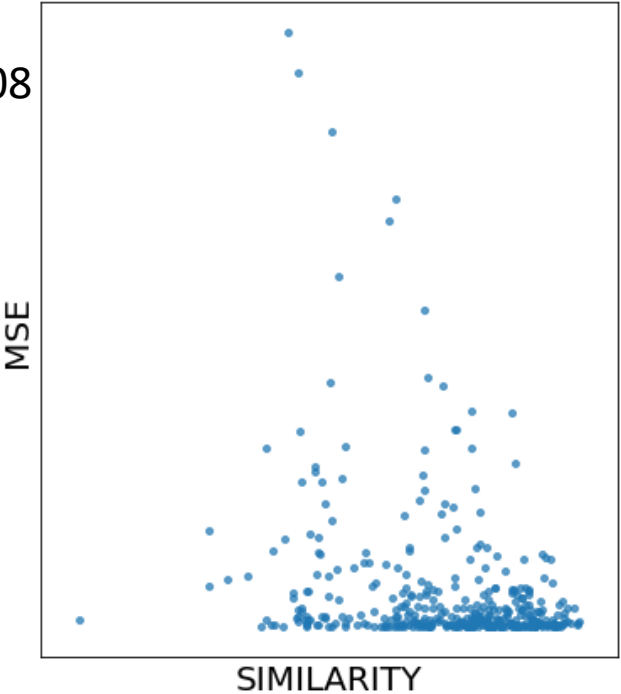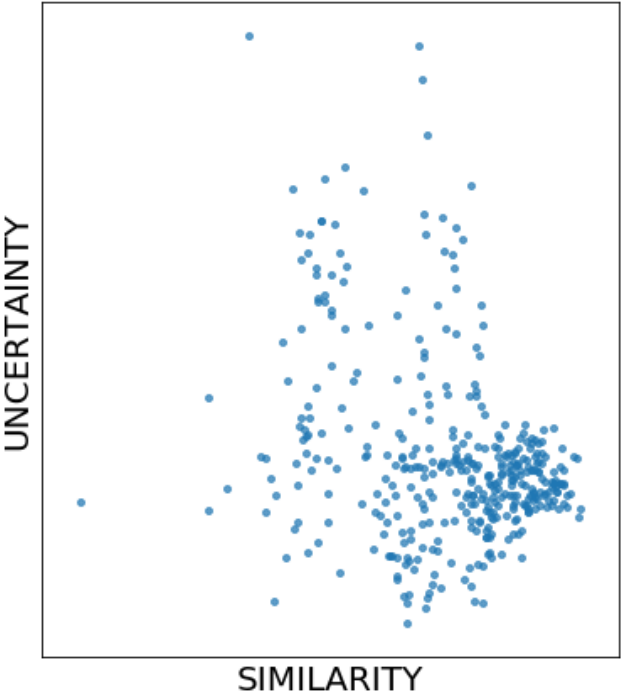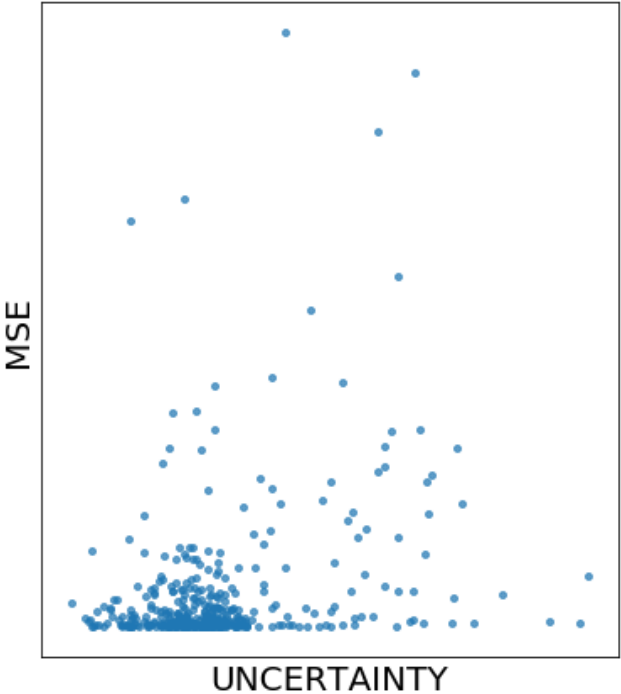

CV

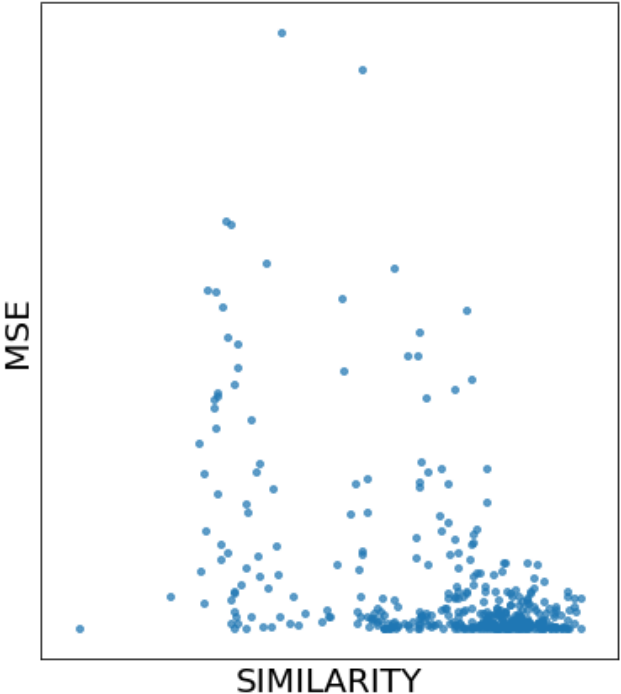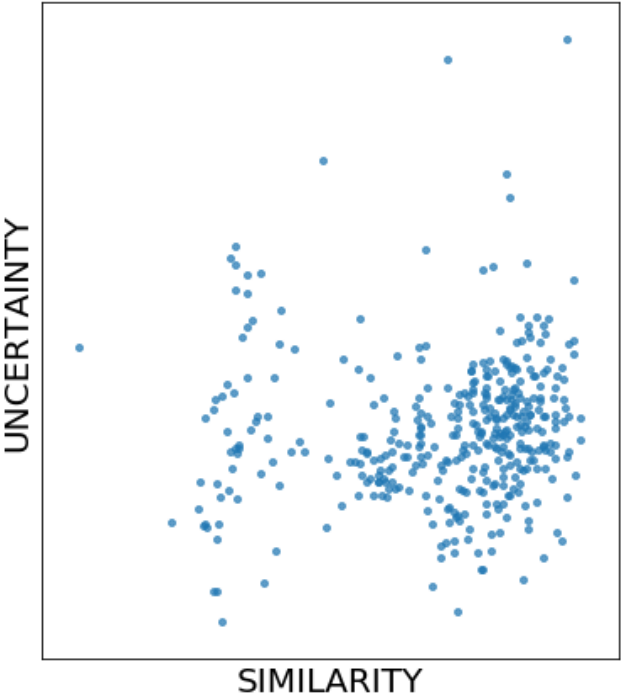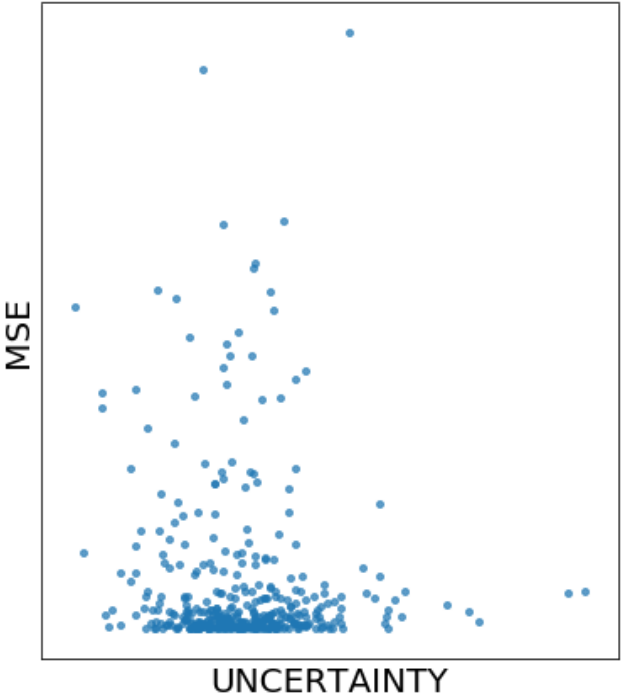

BAC

MACCSFP  
CHEMBL4644

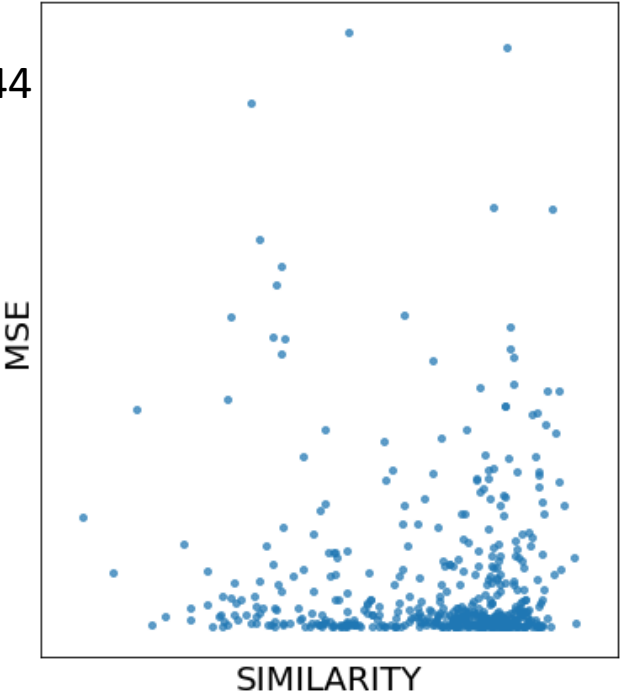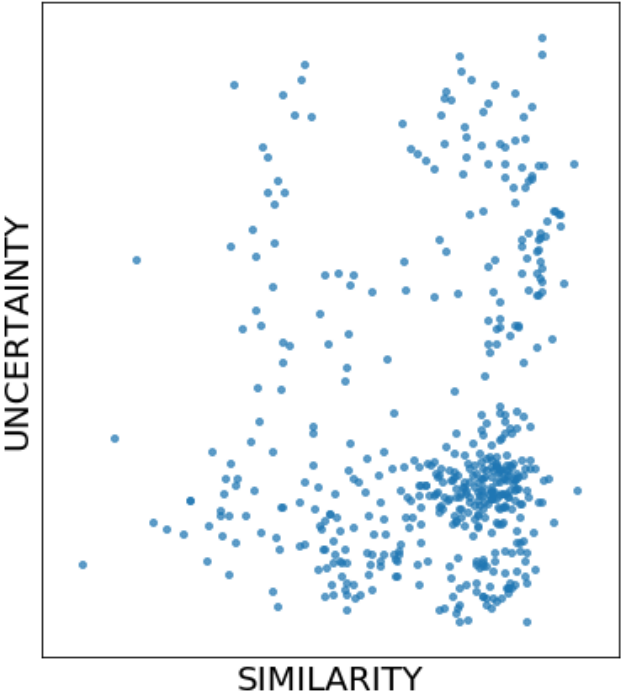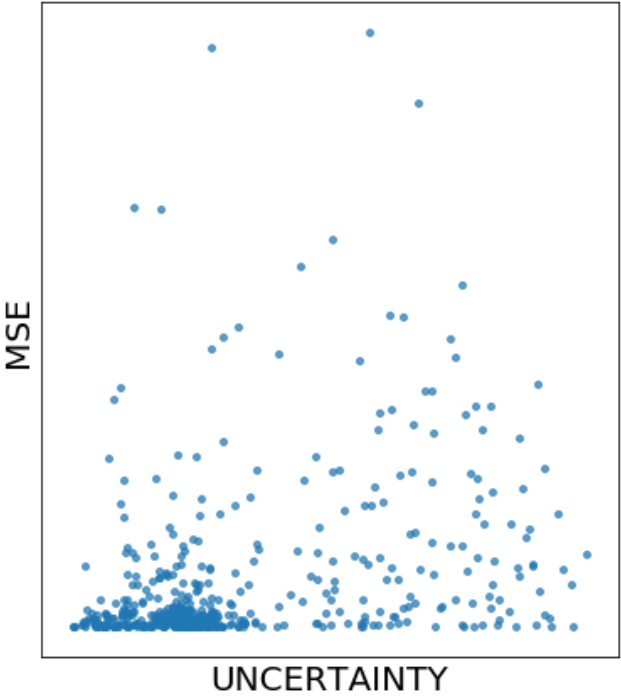

CV

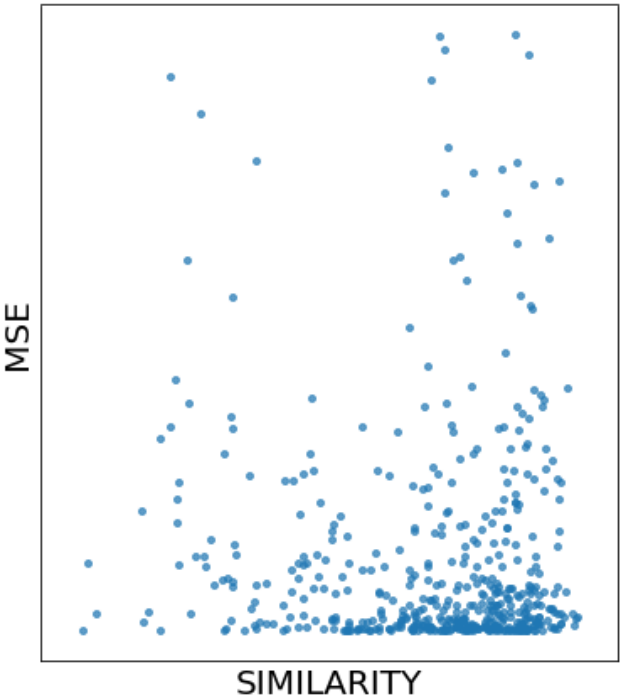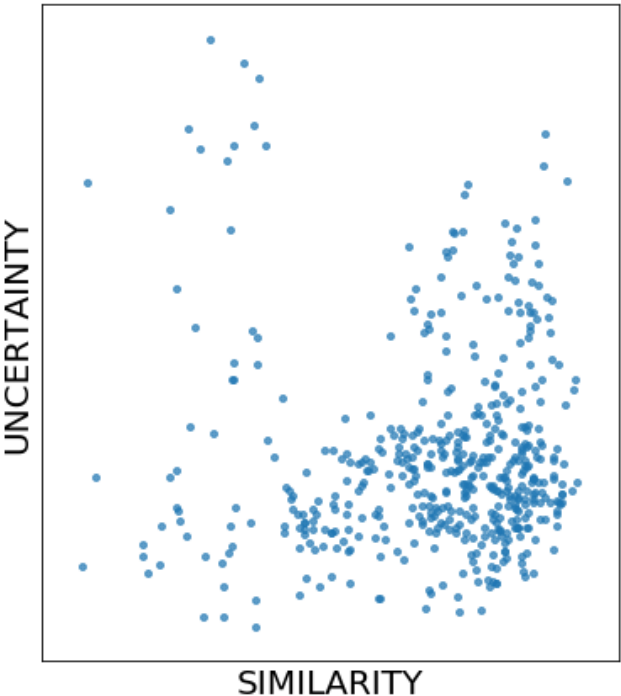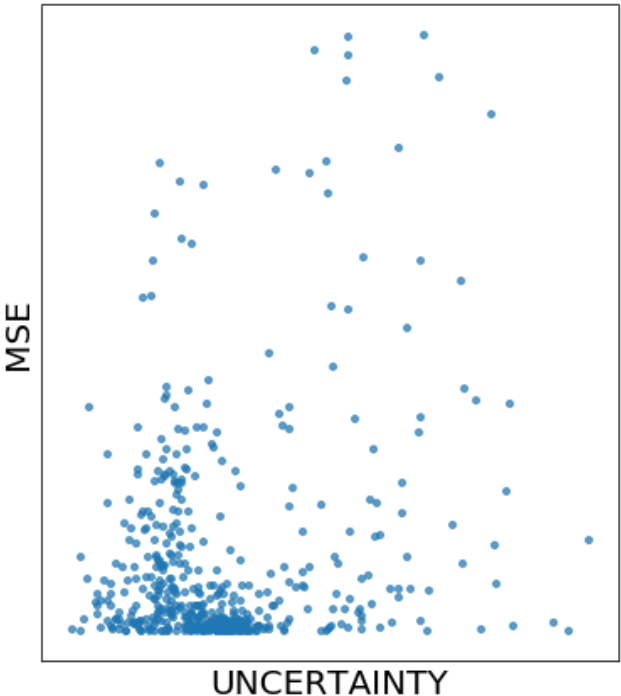

BAC

MACCSFP  
CHEMBL4792

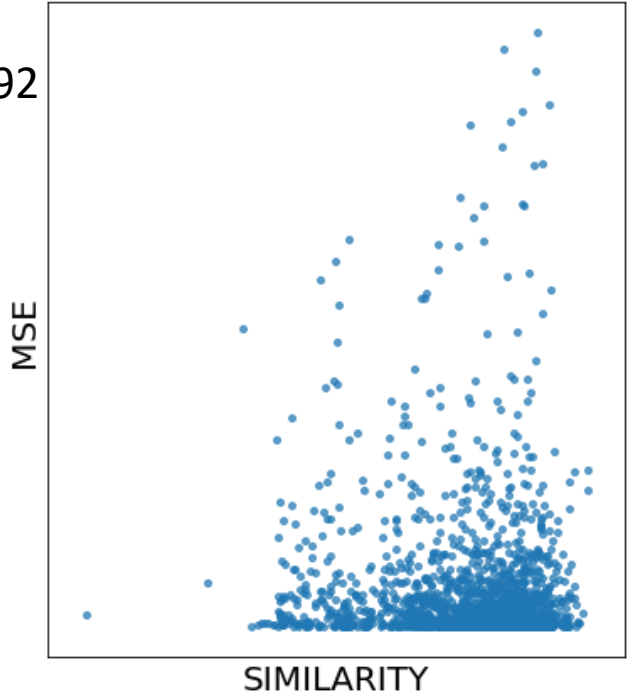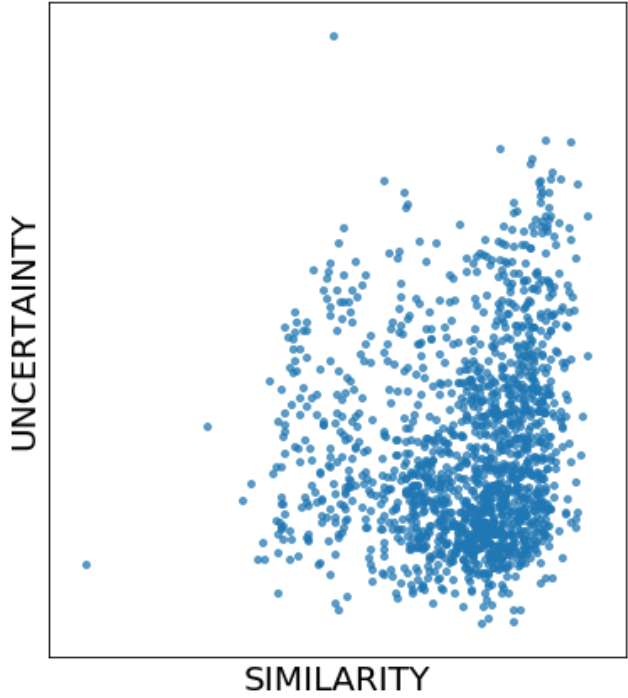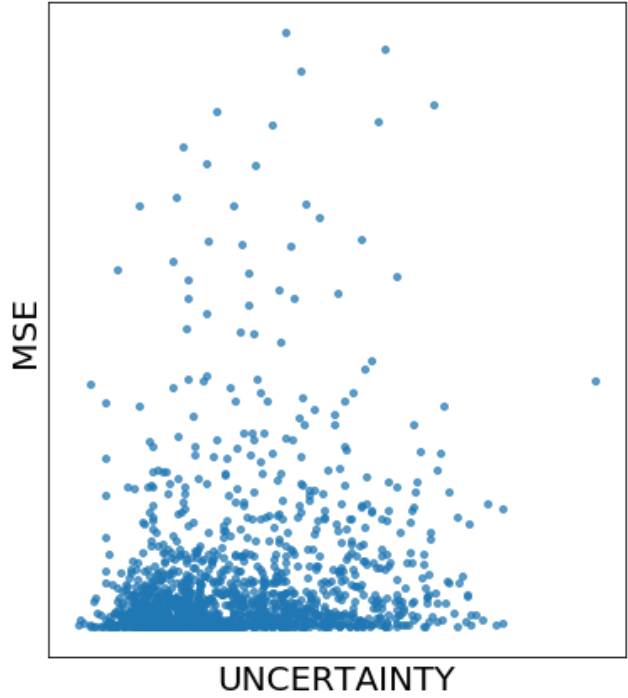

CV

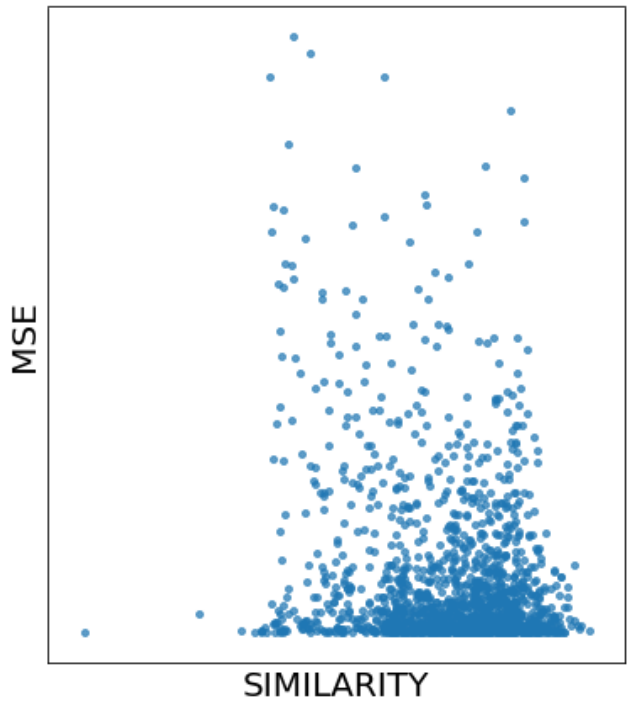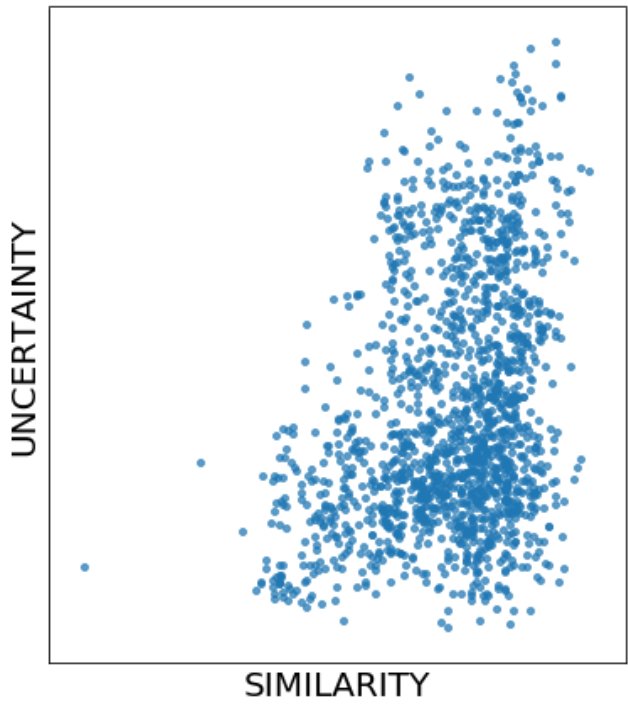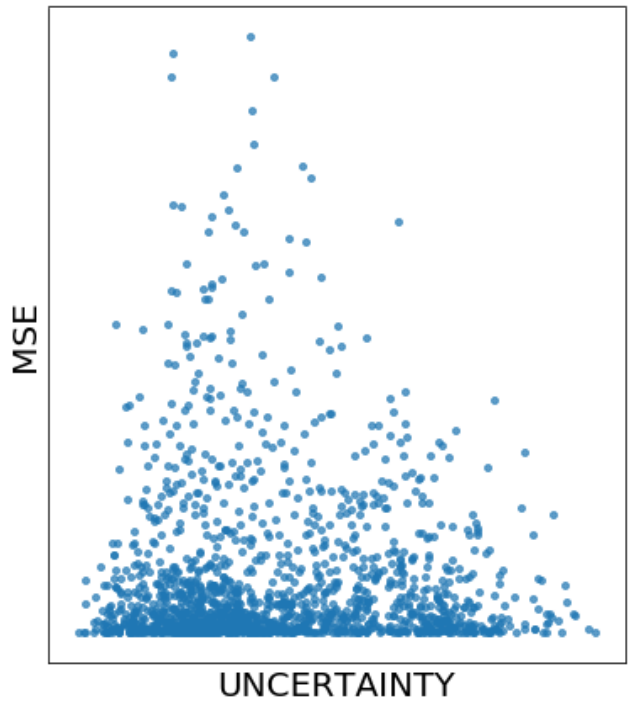

BAC

MACCSFP  
CHEMBL5113

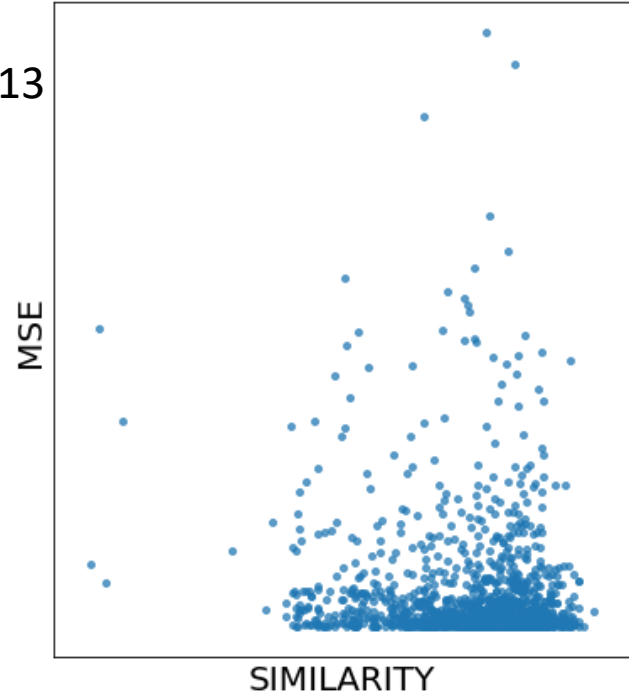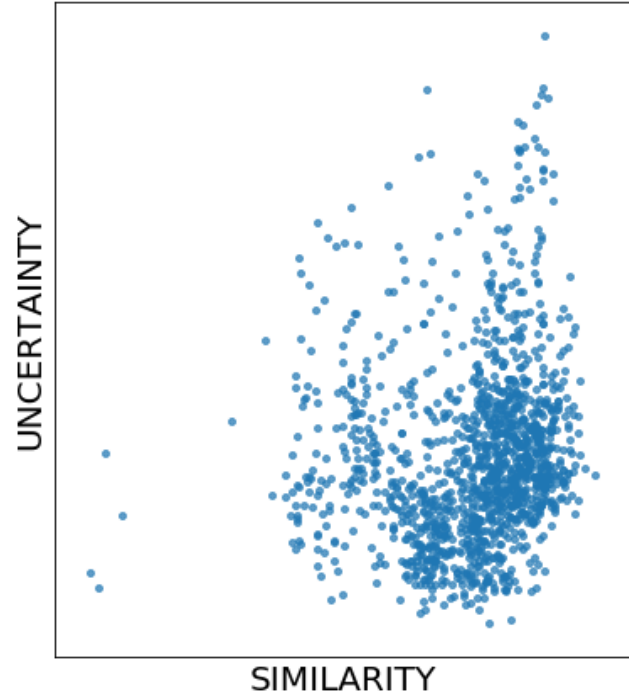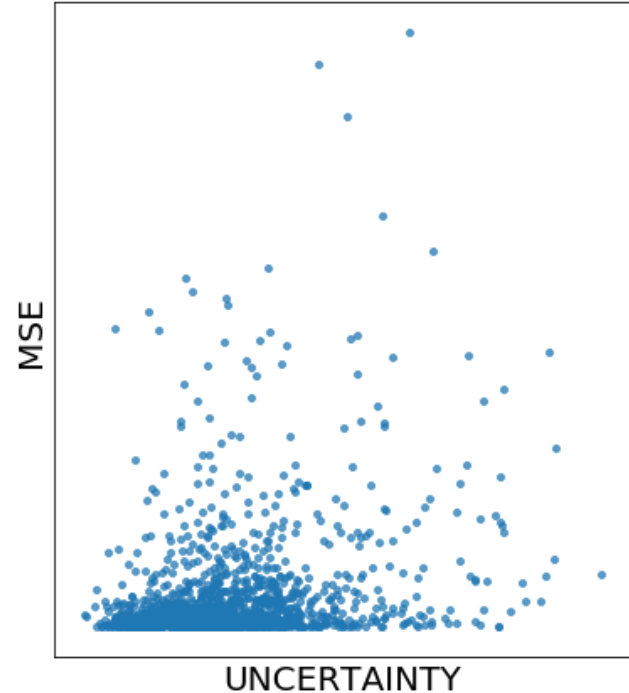

CV

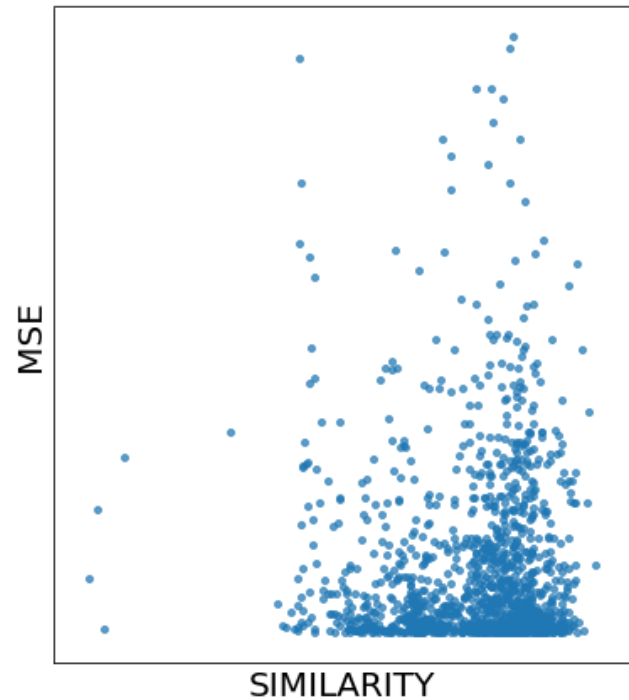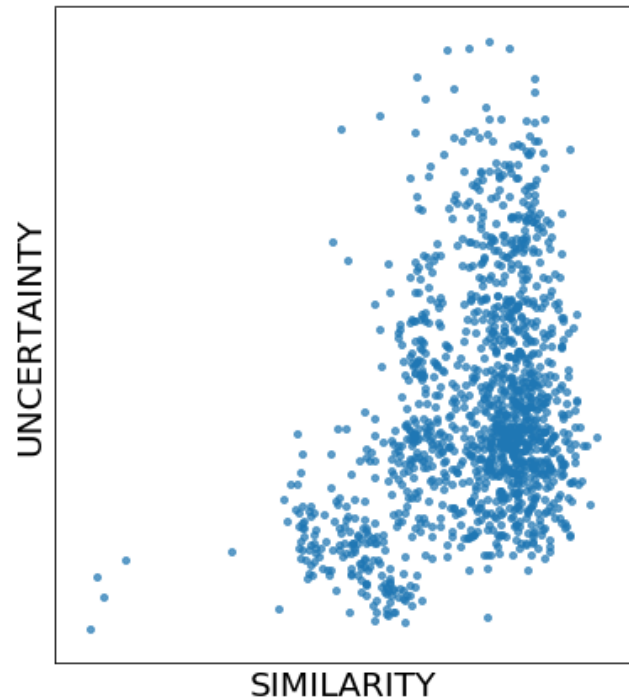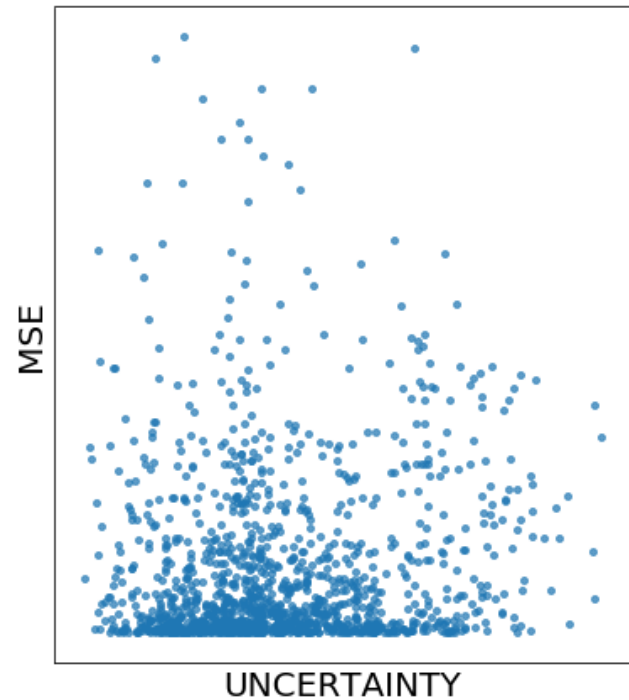

BAC
