# Supplementary figures and images for: How Sure Can We Be about ML Methods-Based Evaluation of Compound Activity: Incorporation of Information about Prediction Uncertainty Using Deep Learning Techniques
Source: MDPI journal article supplement (doi:10.3390/molecules25061452), 2020-03-23

# CHEMBL214

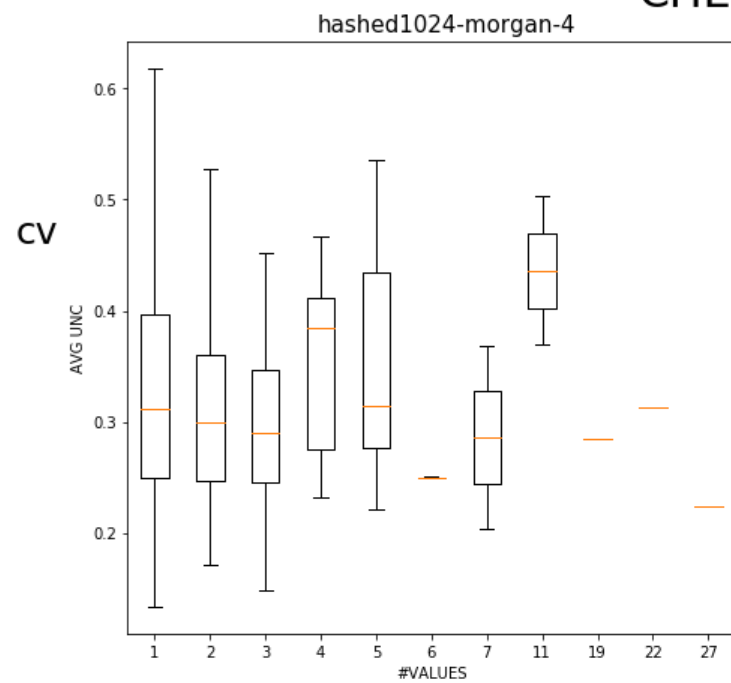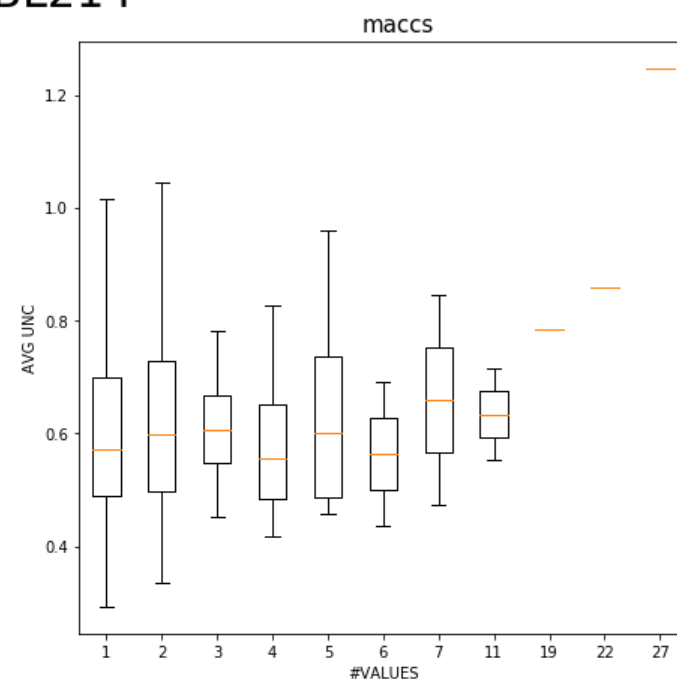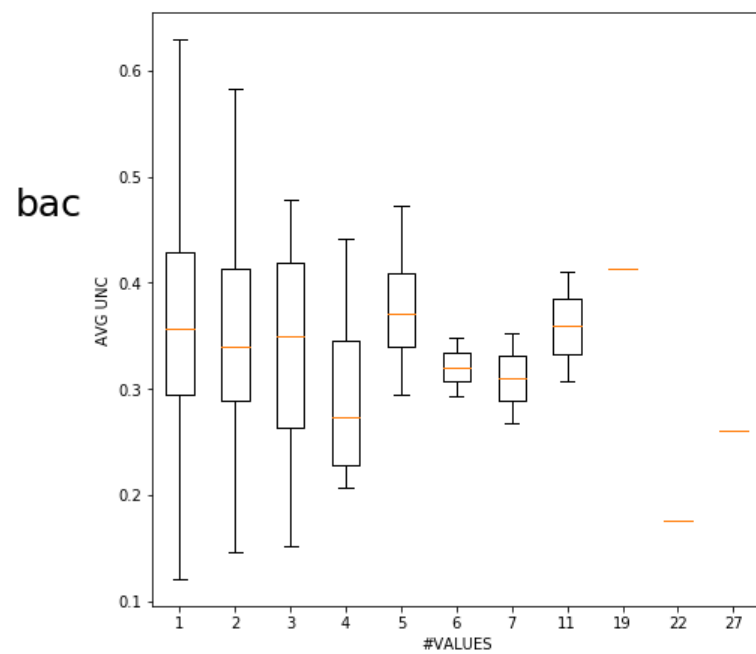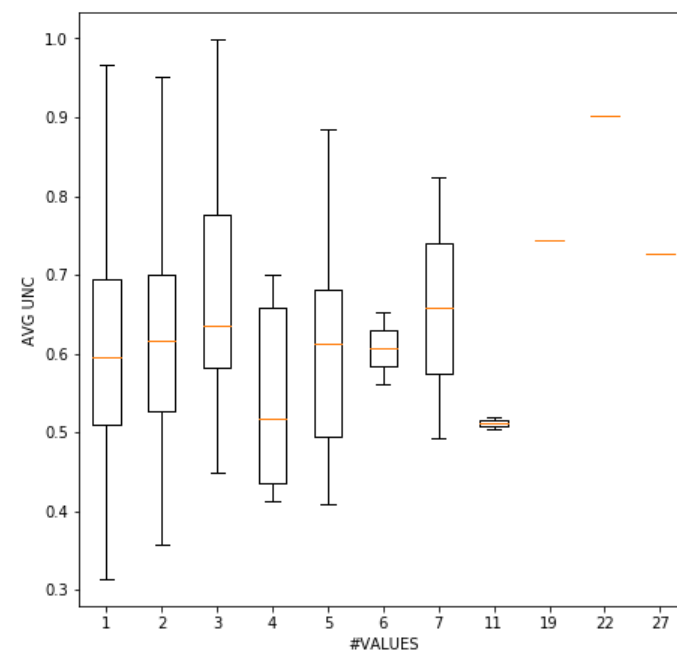

## CHEMBL216

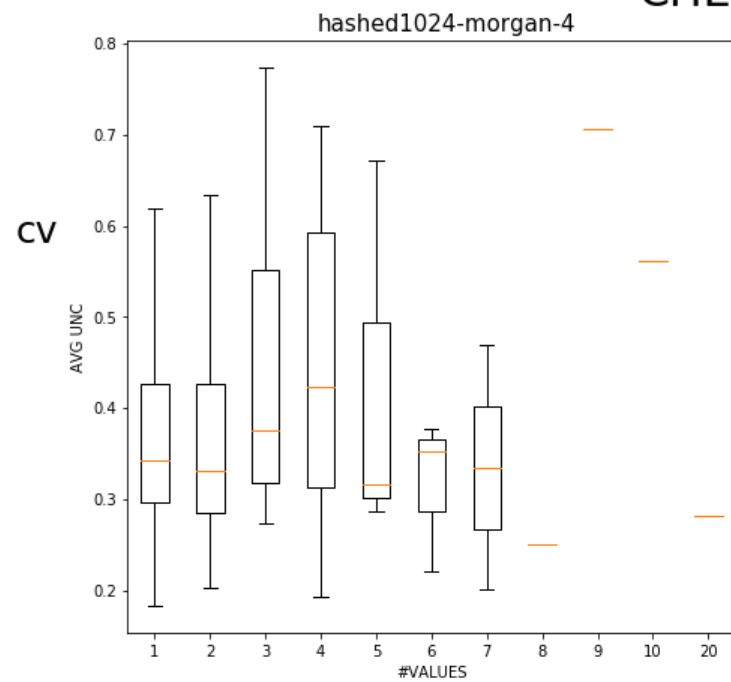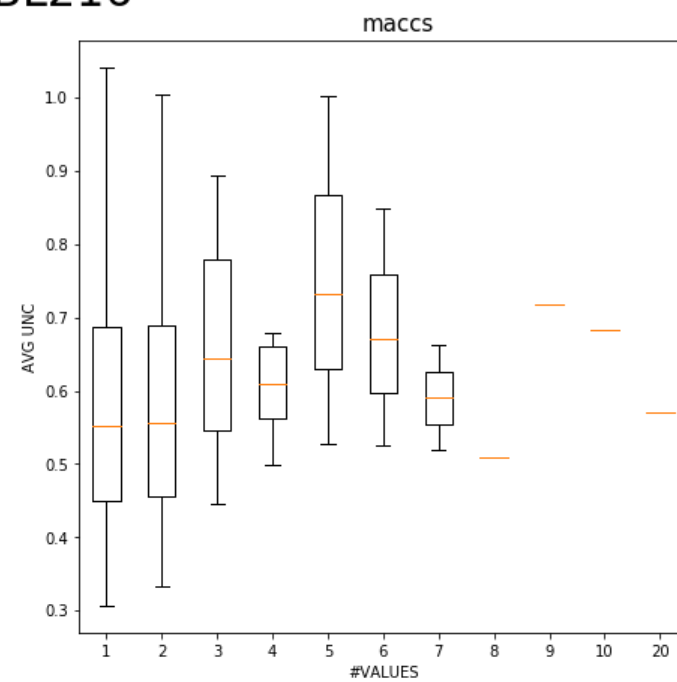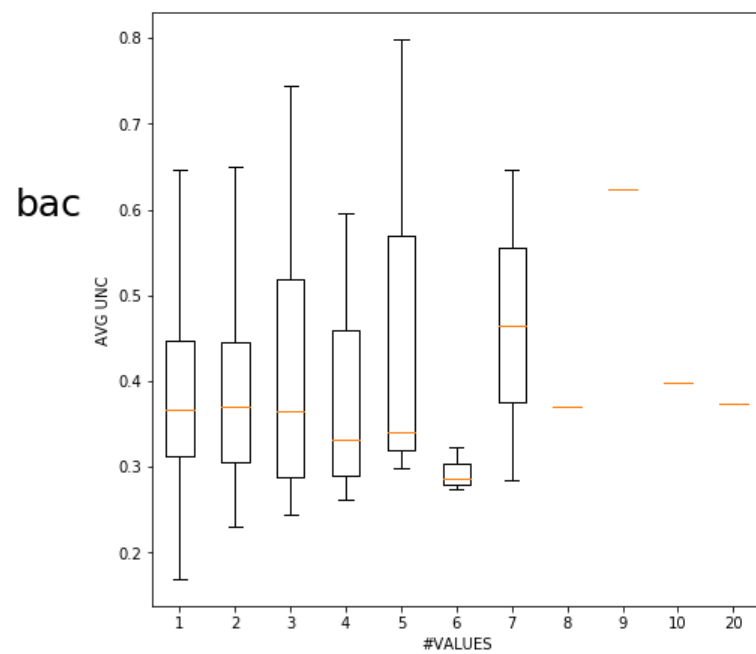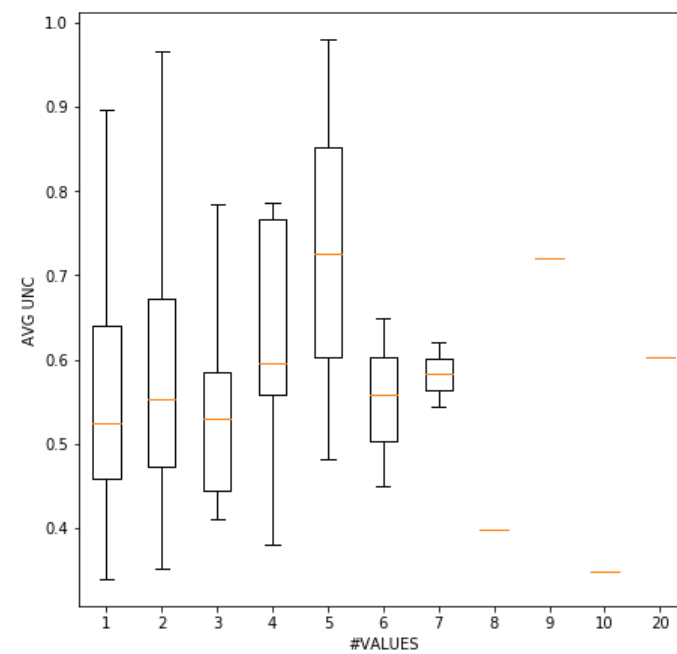

## CHEMBL217

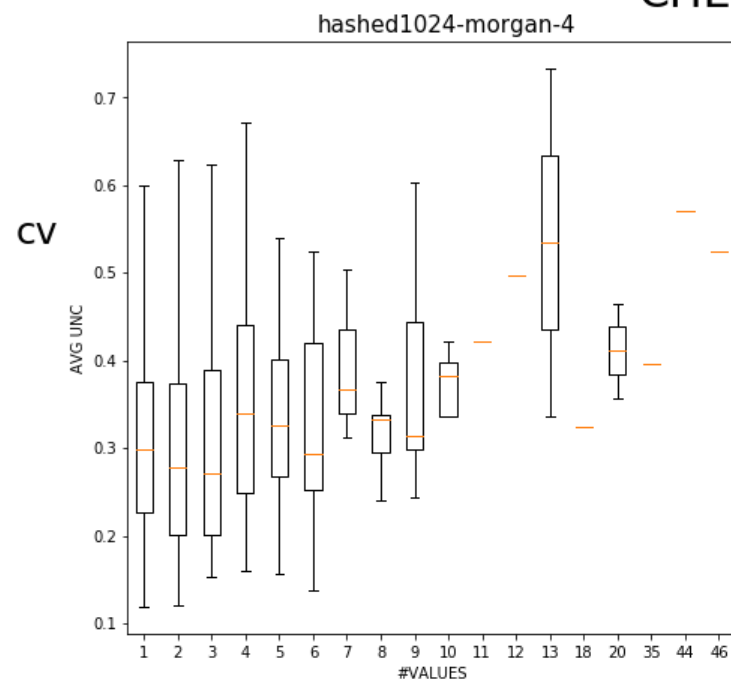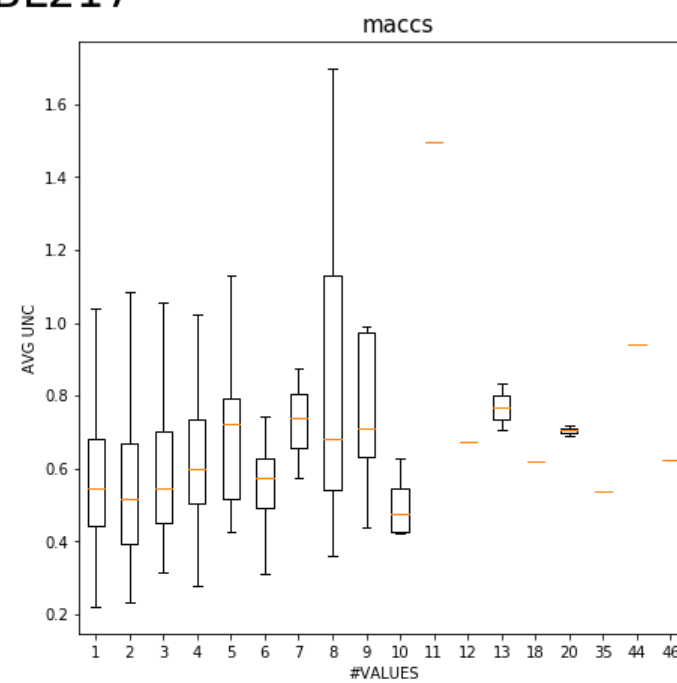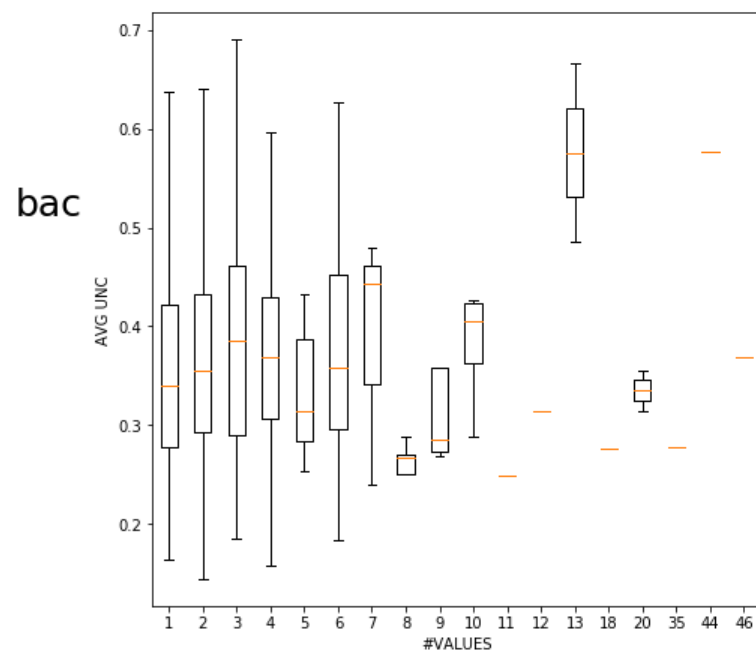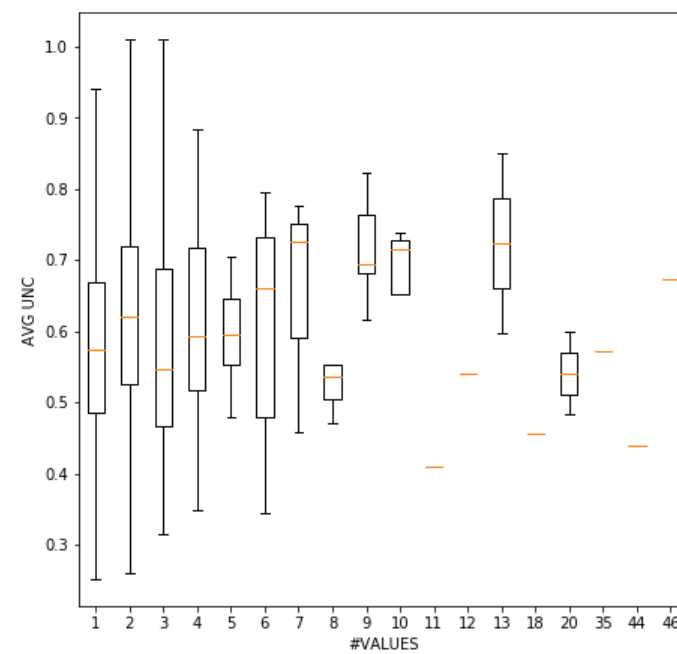

## CHEMBL224

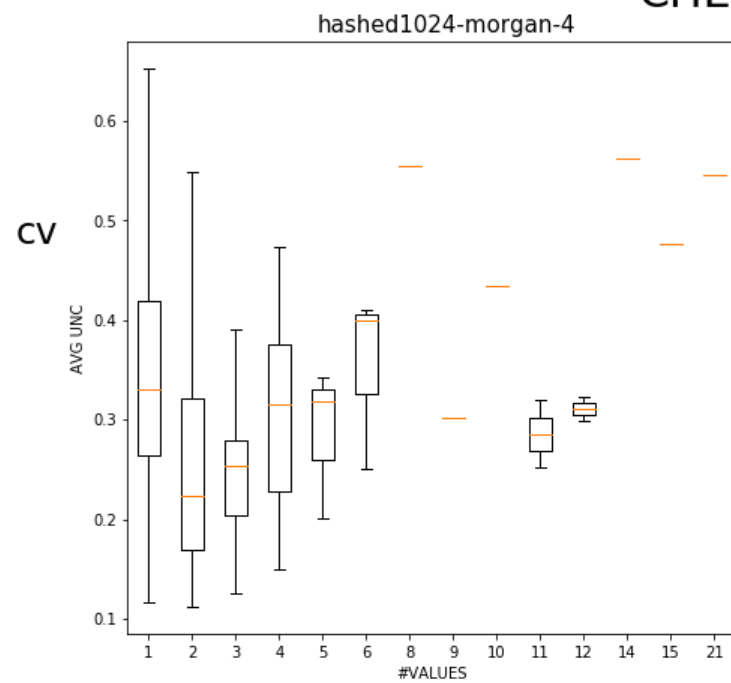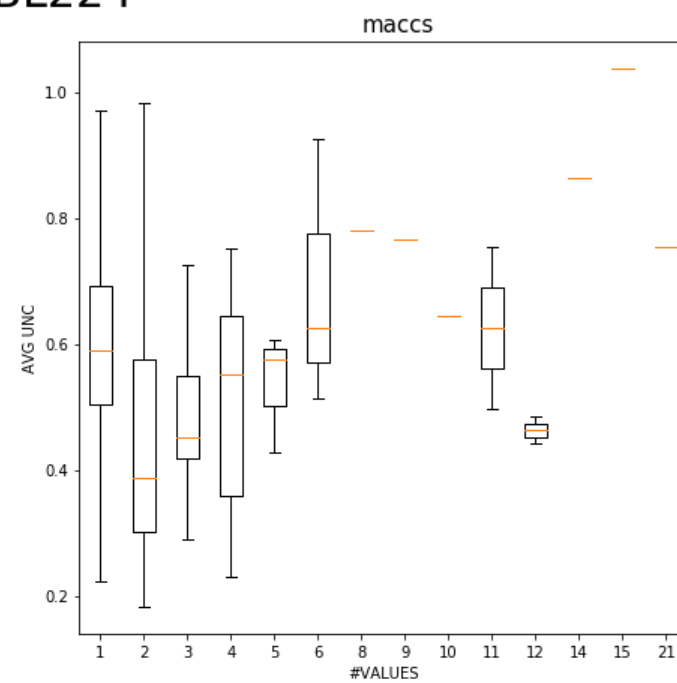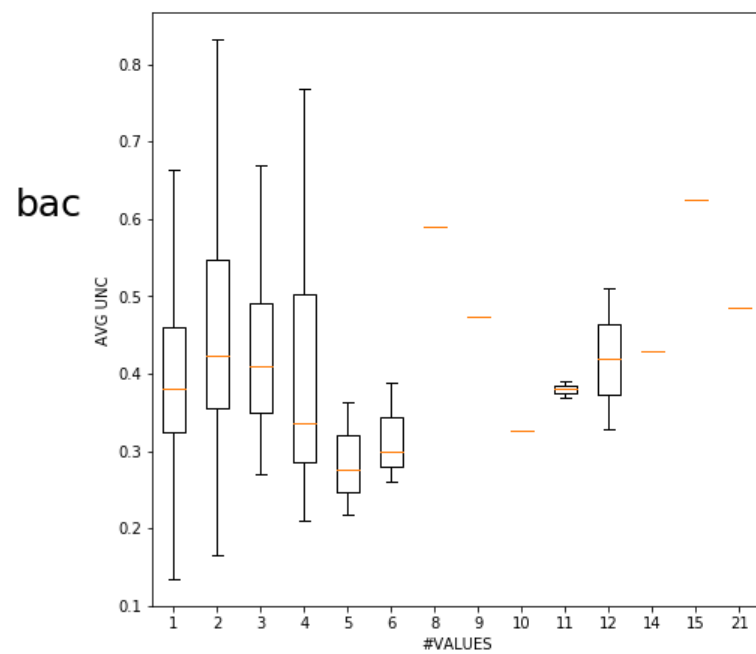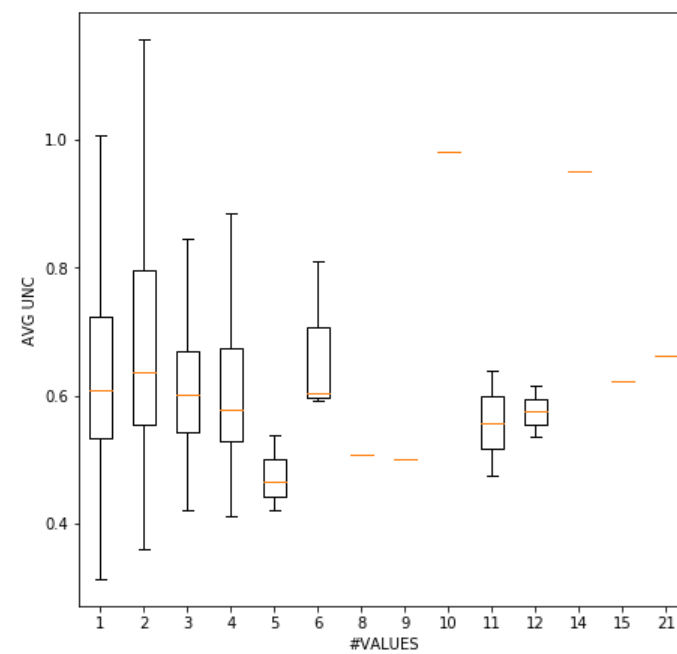

# CHEMBL225

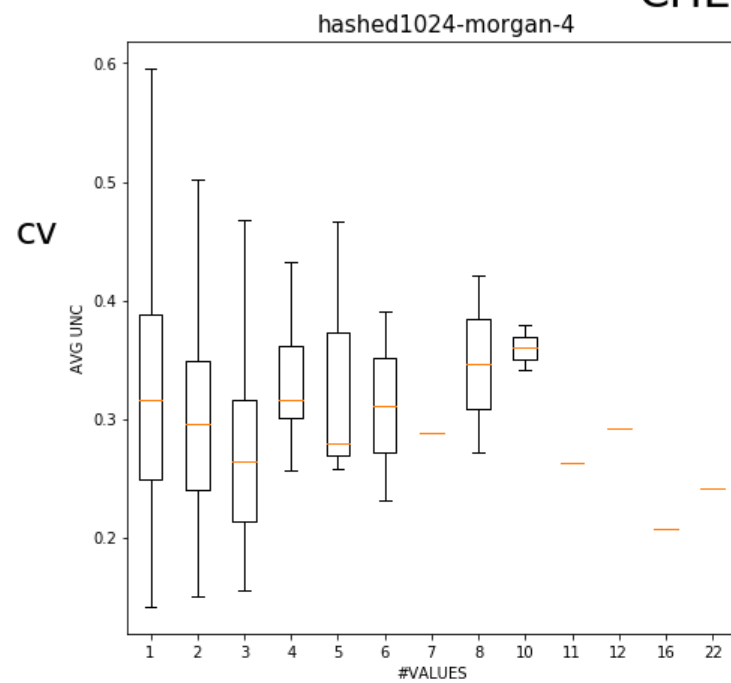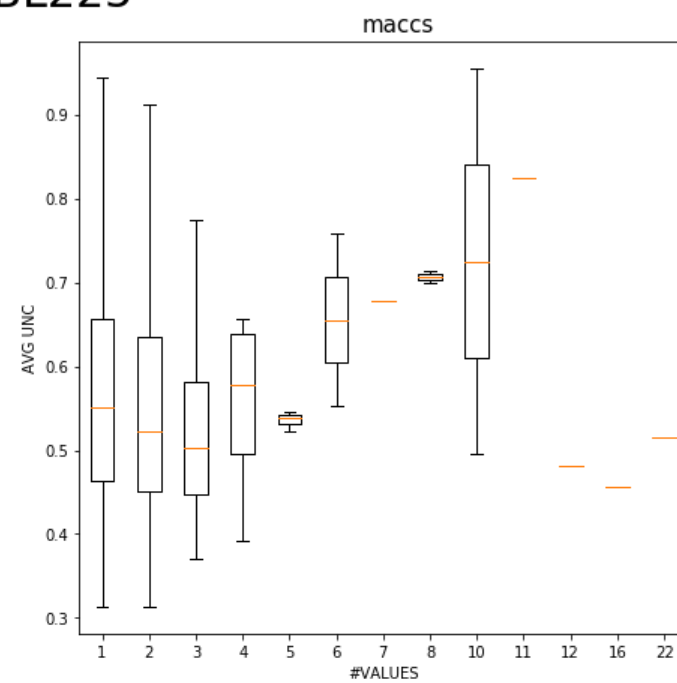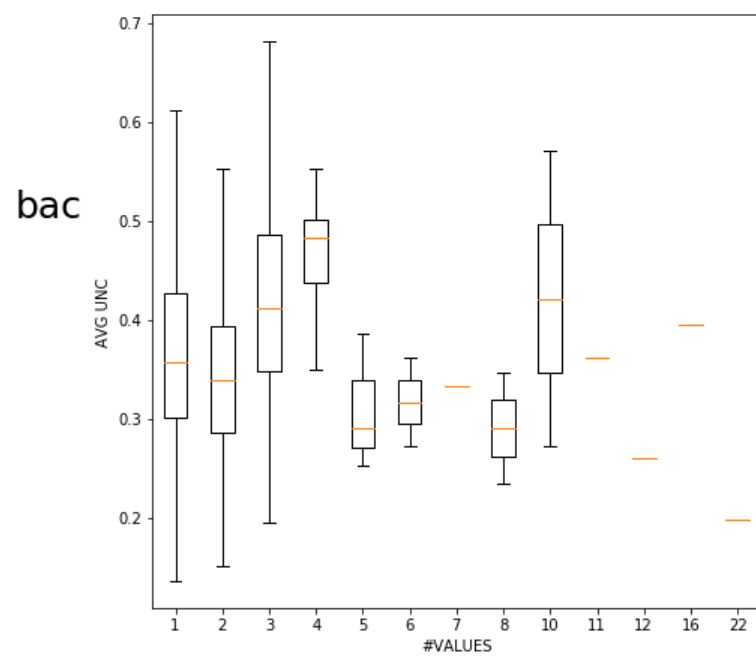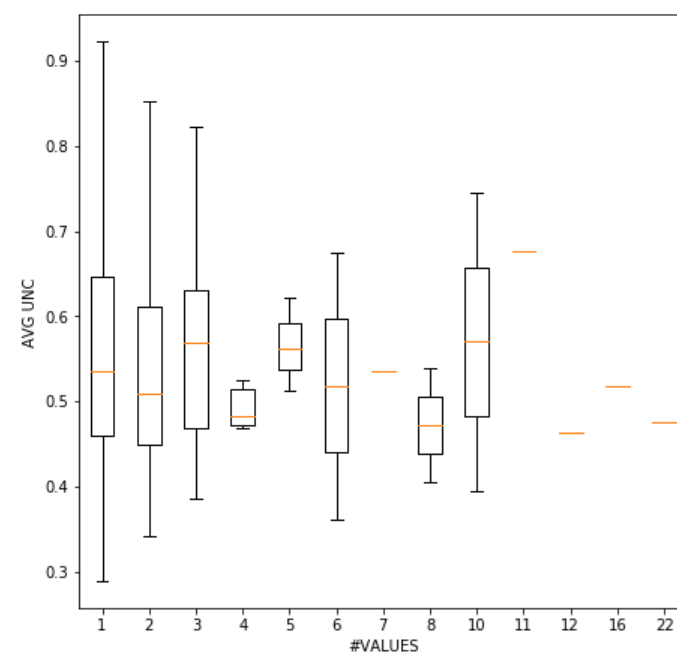

# CHEMBL226

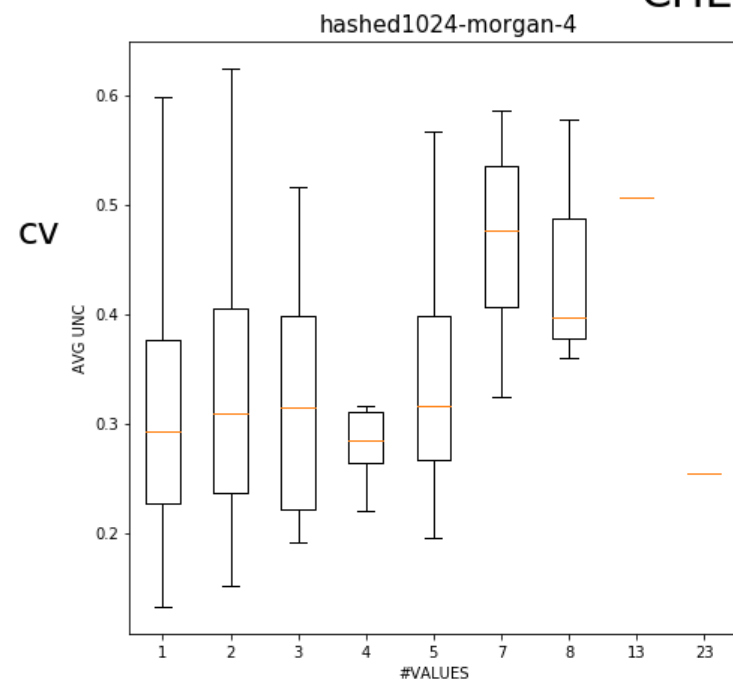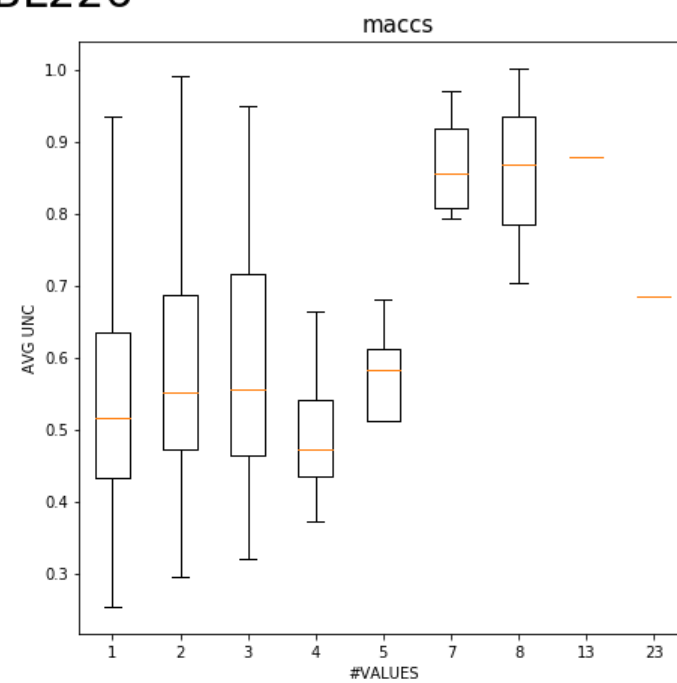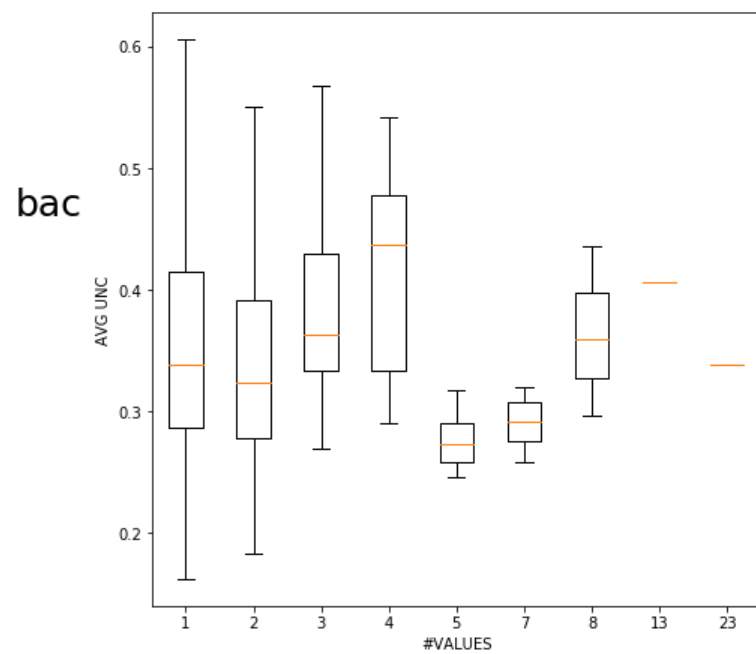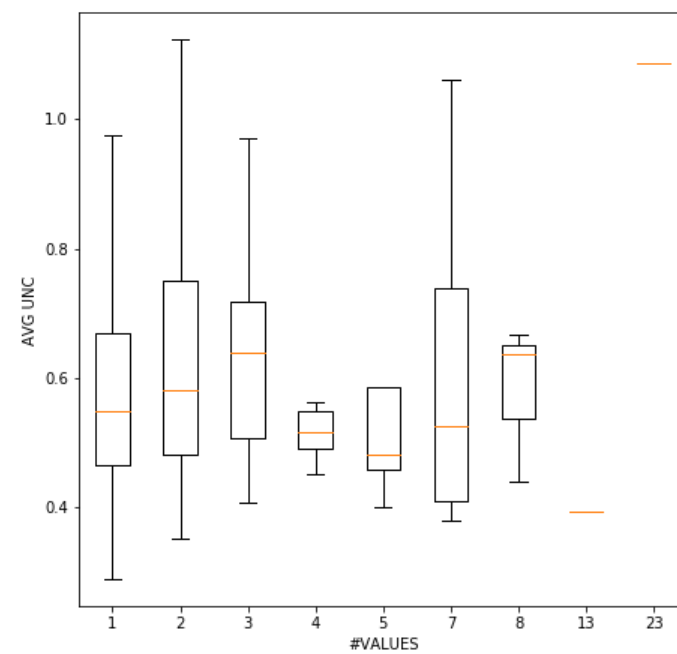

# CHEMBL251

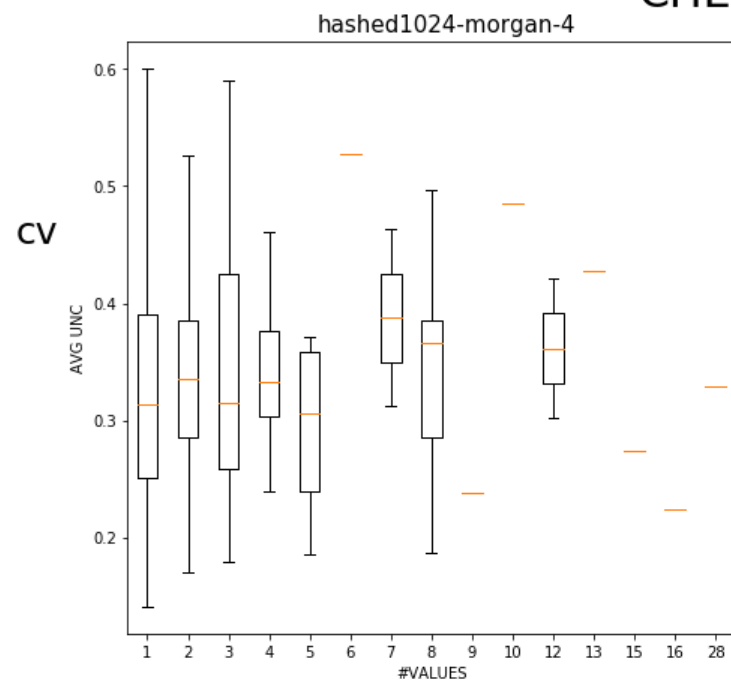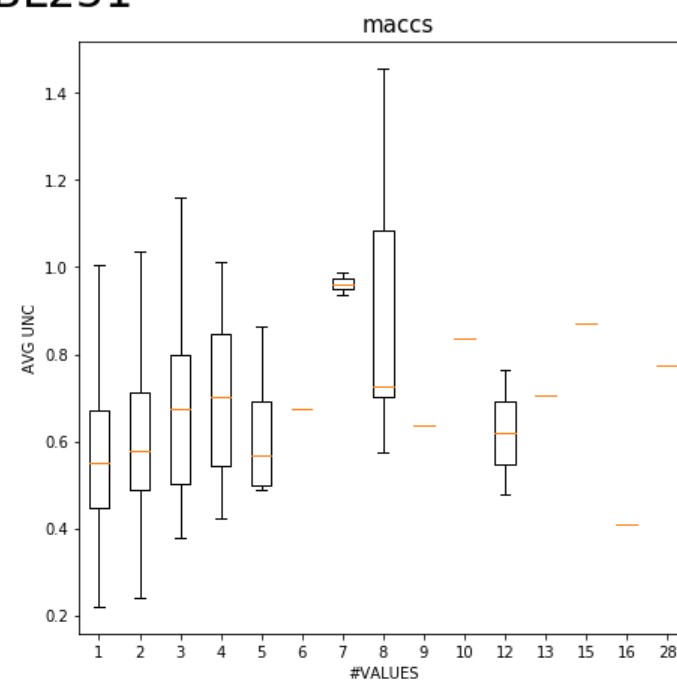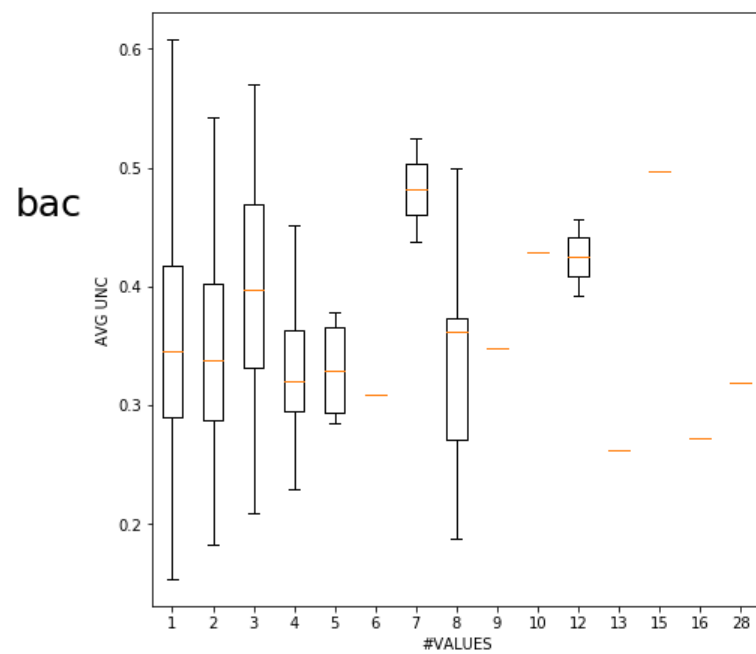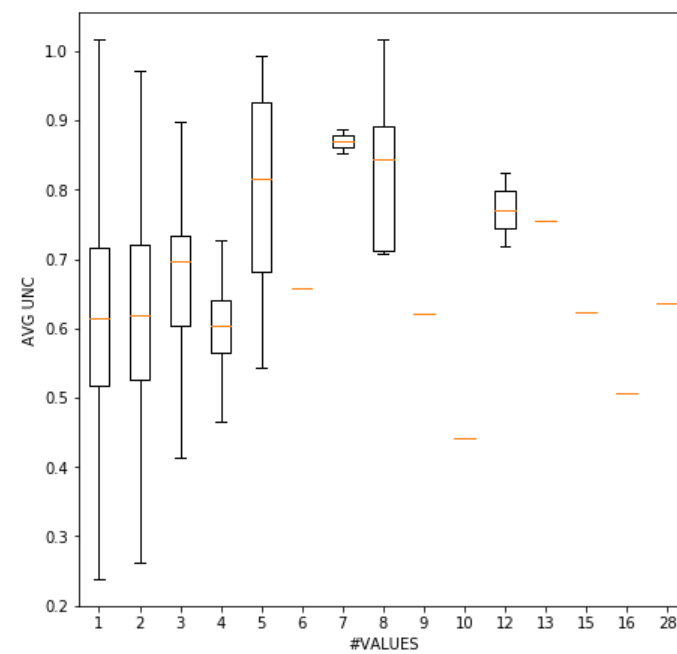

# CHEMBL264

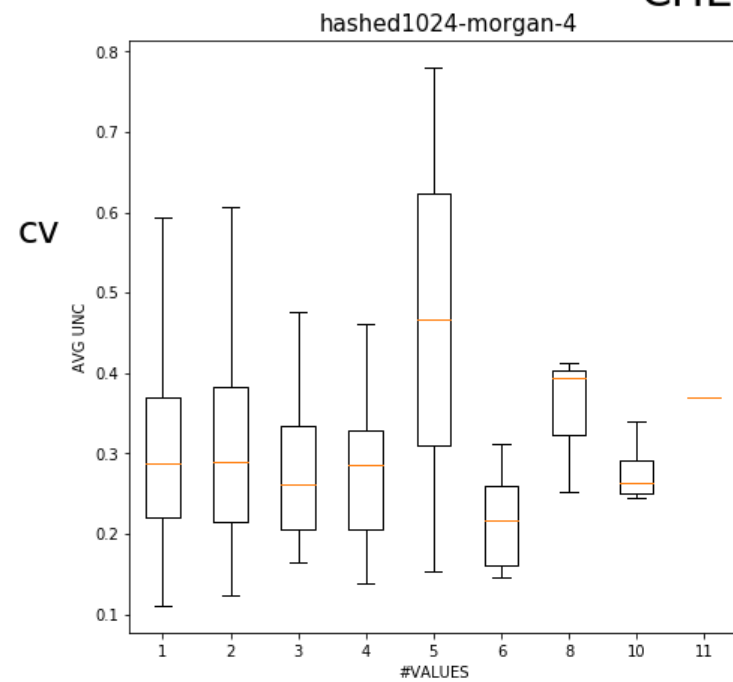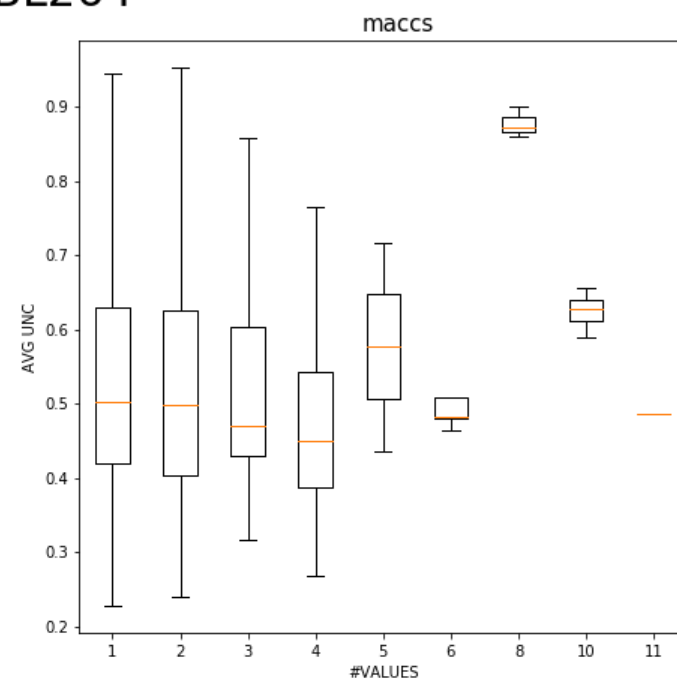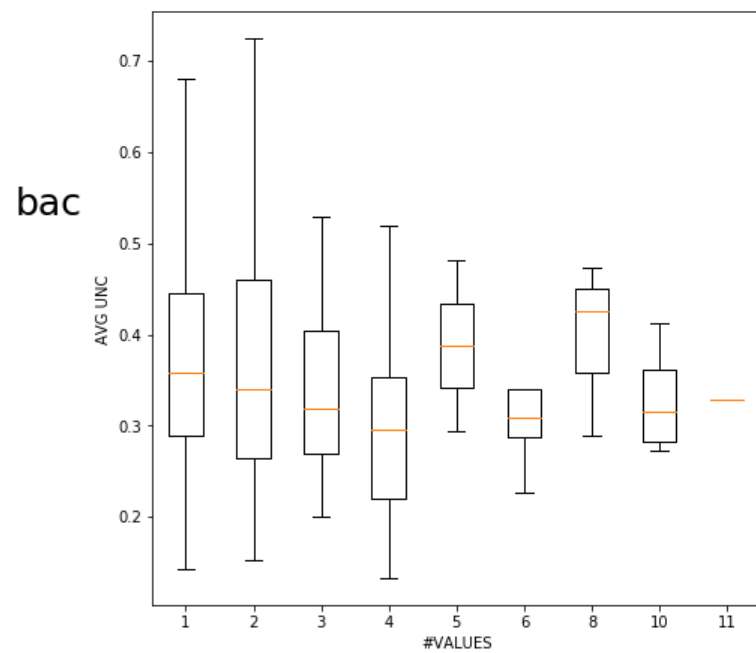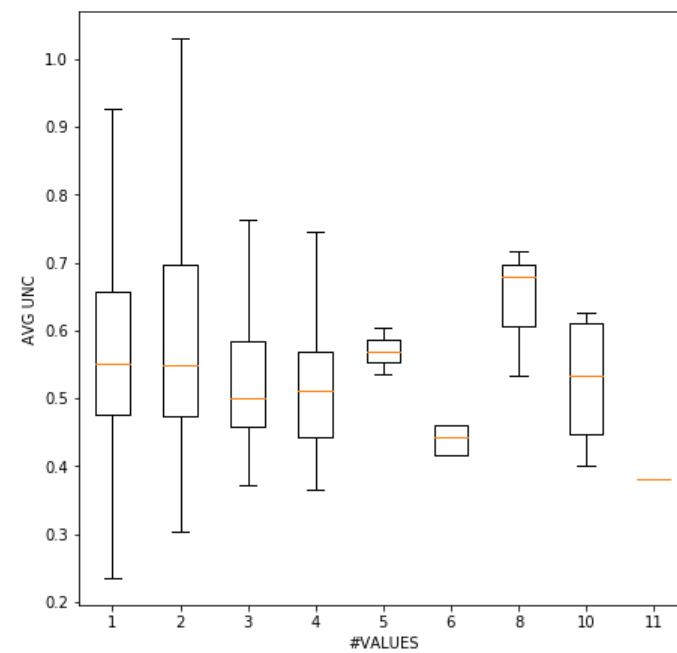



## CHEMBL3155

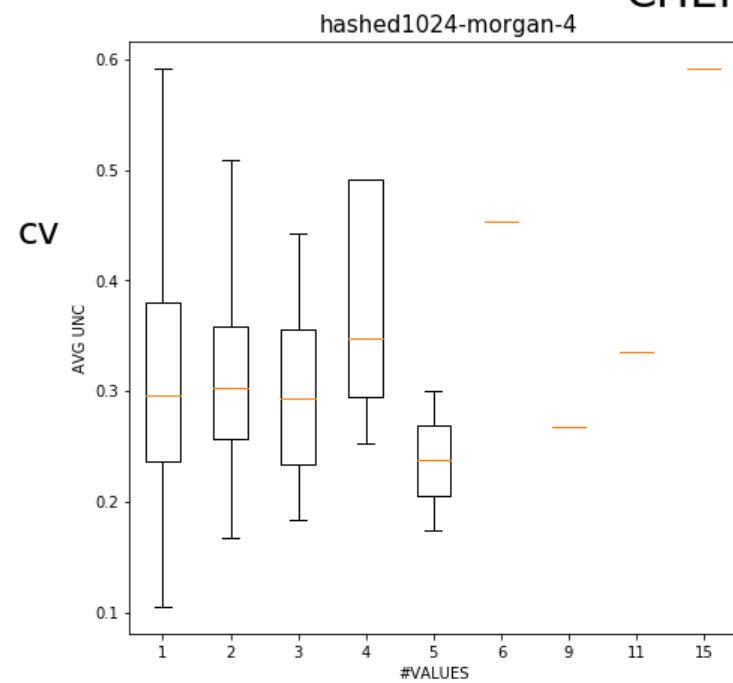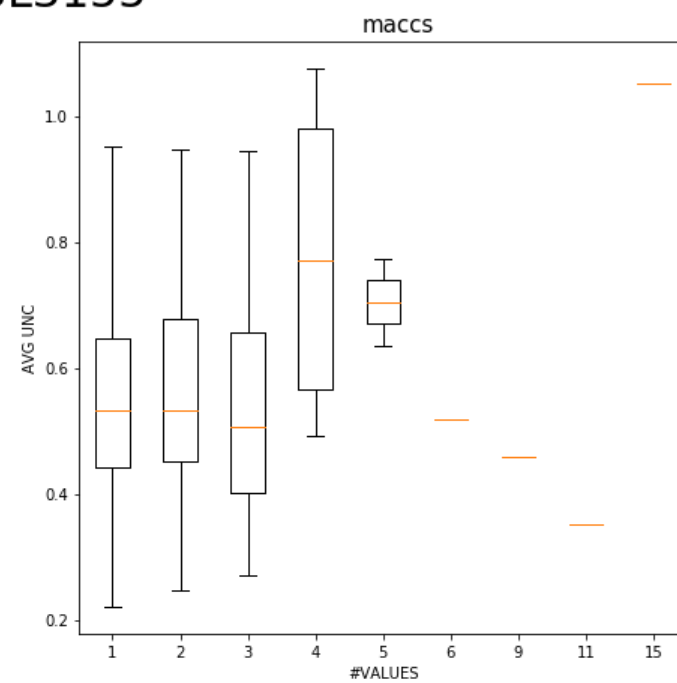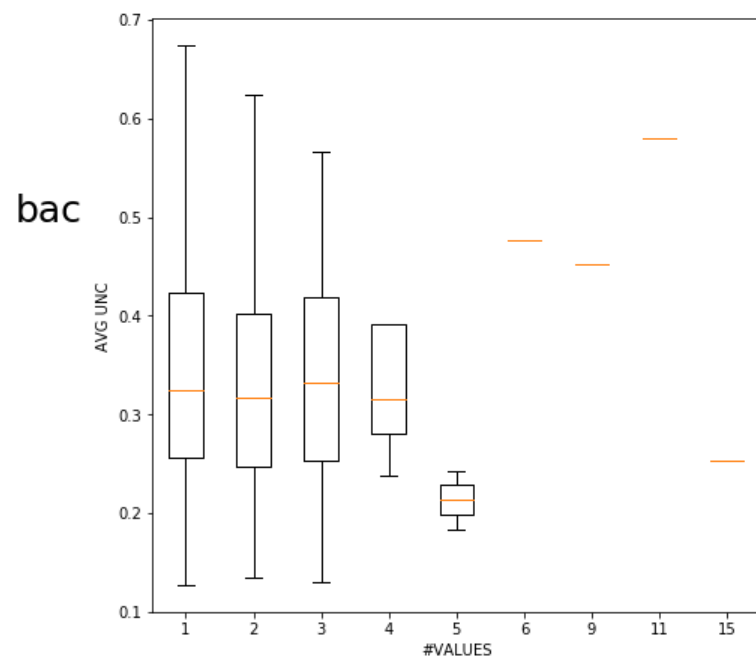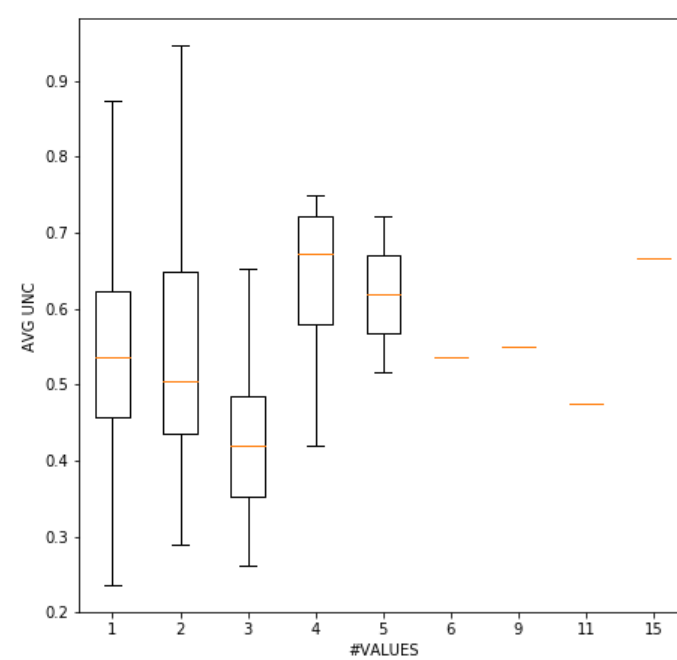

# CHEMBL3371

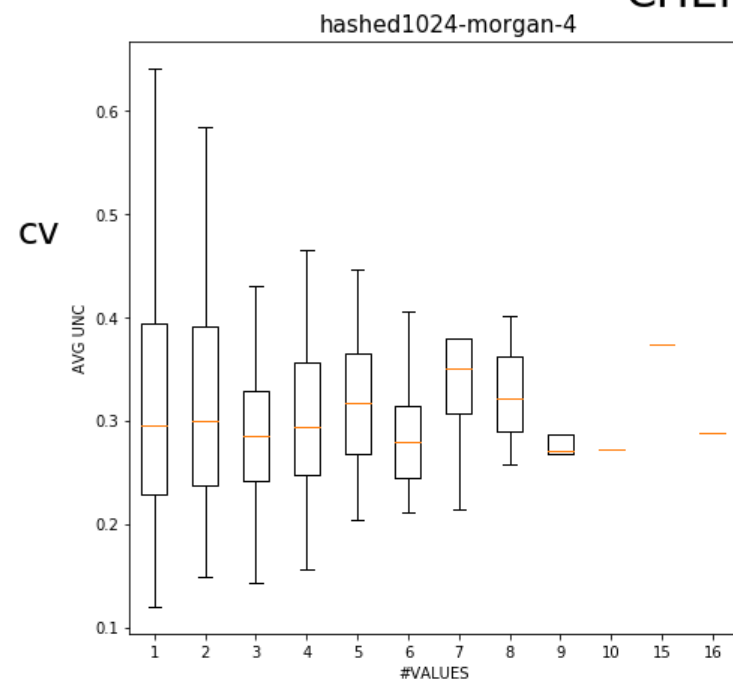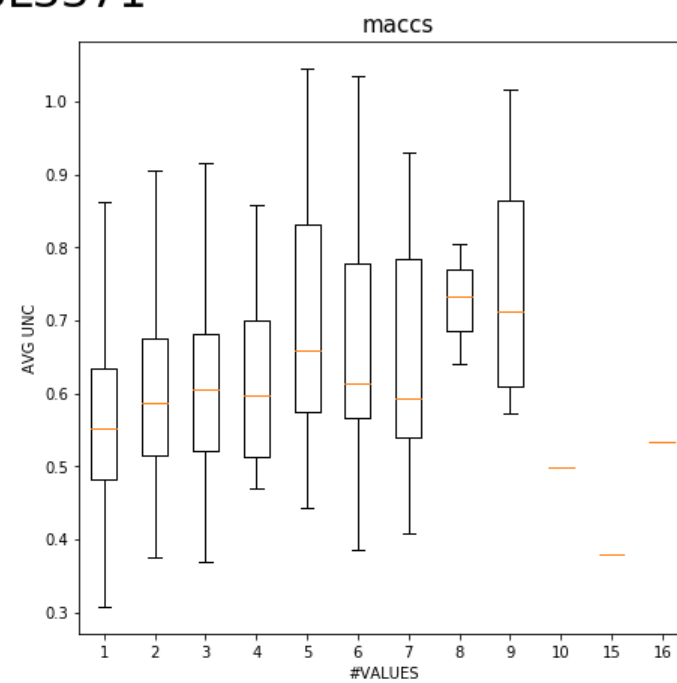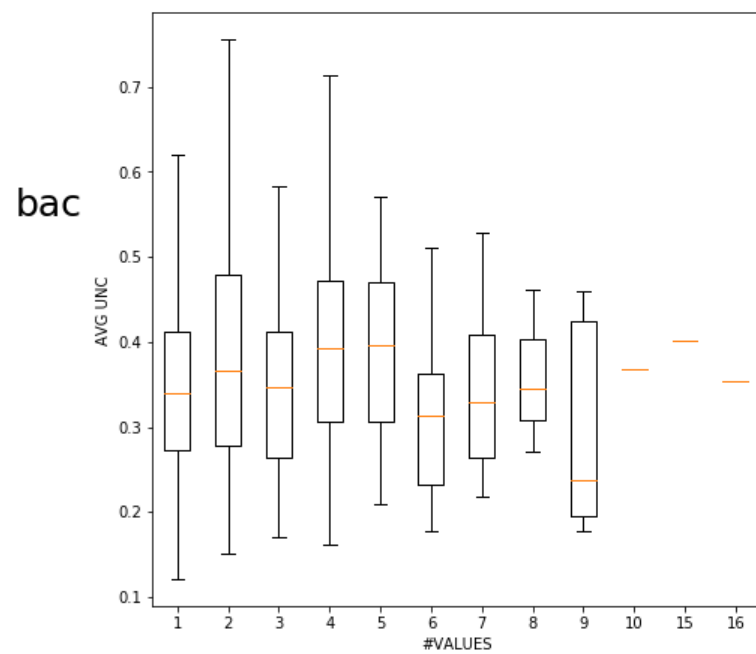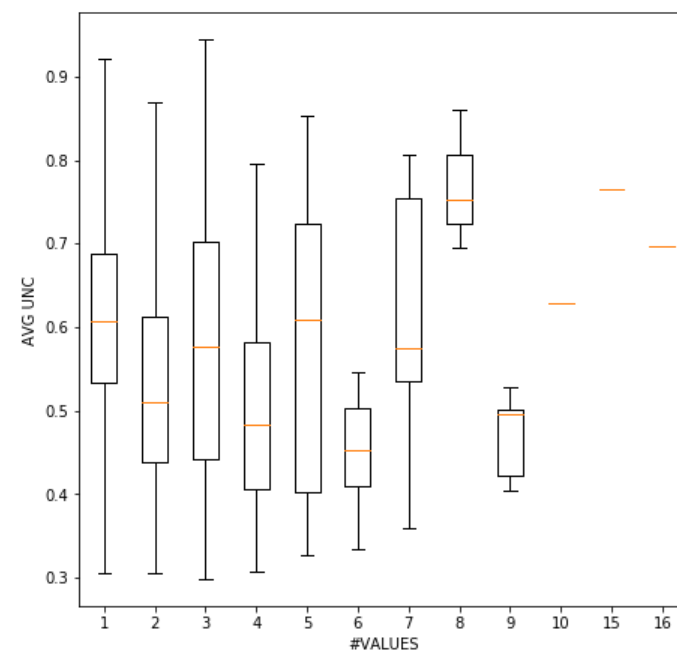

Supplement: s1 [file s1]

CHEMBL214

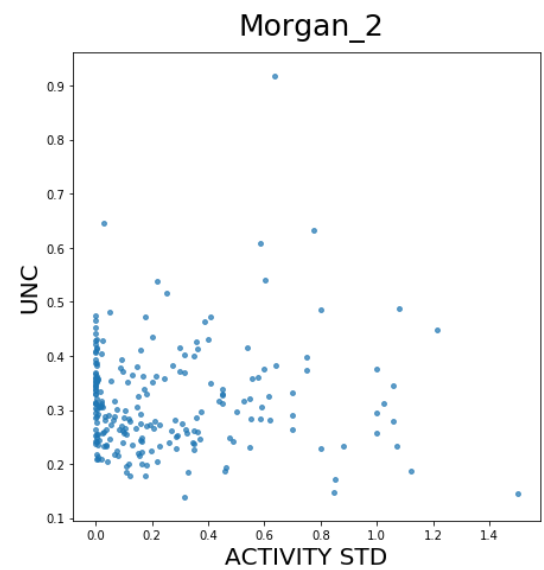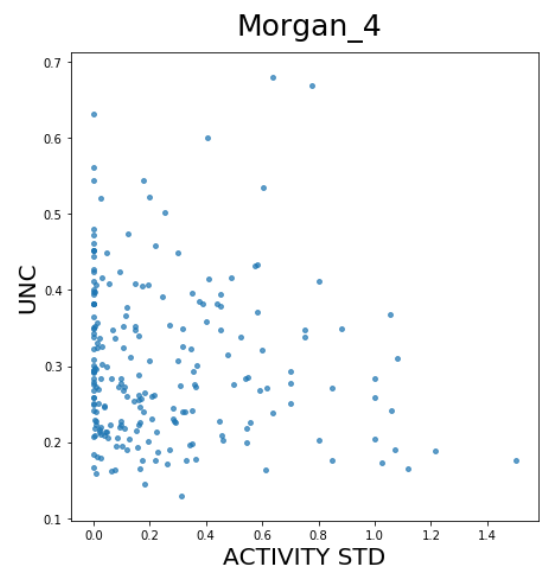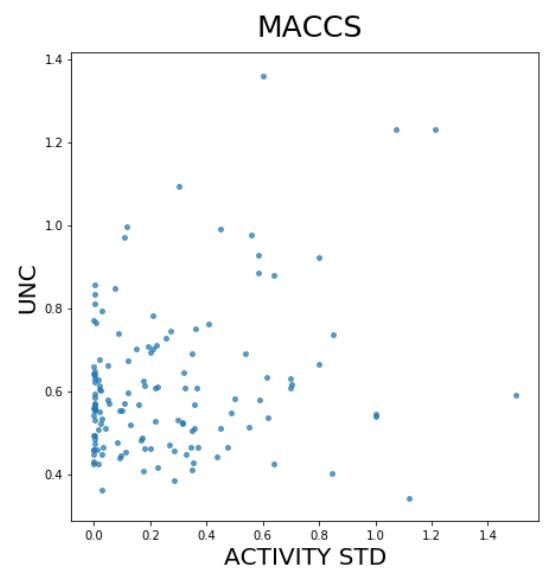

CV

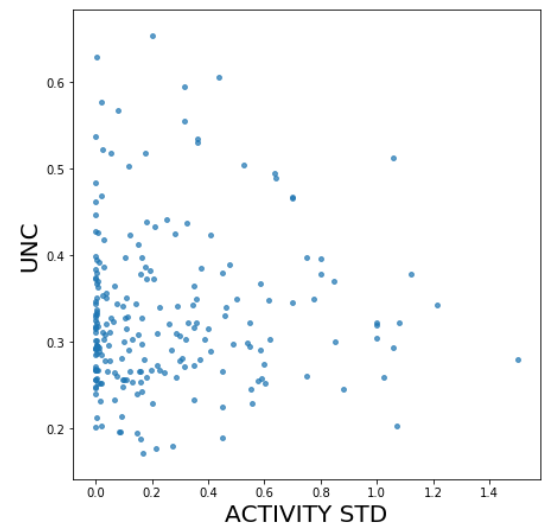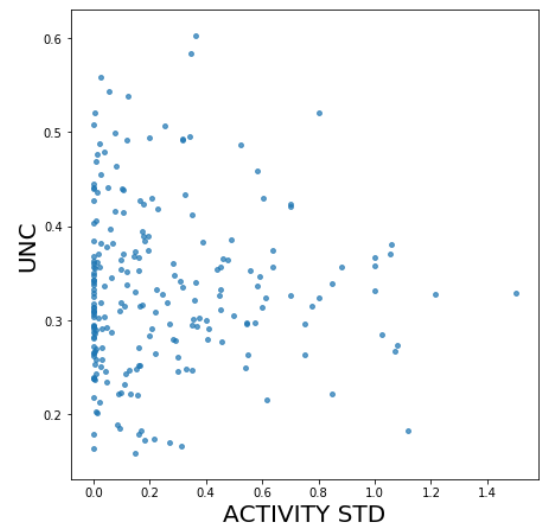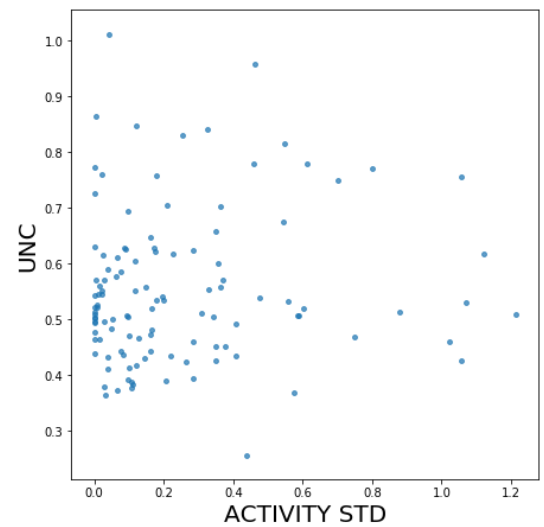

BAC

CHEMBL216

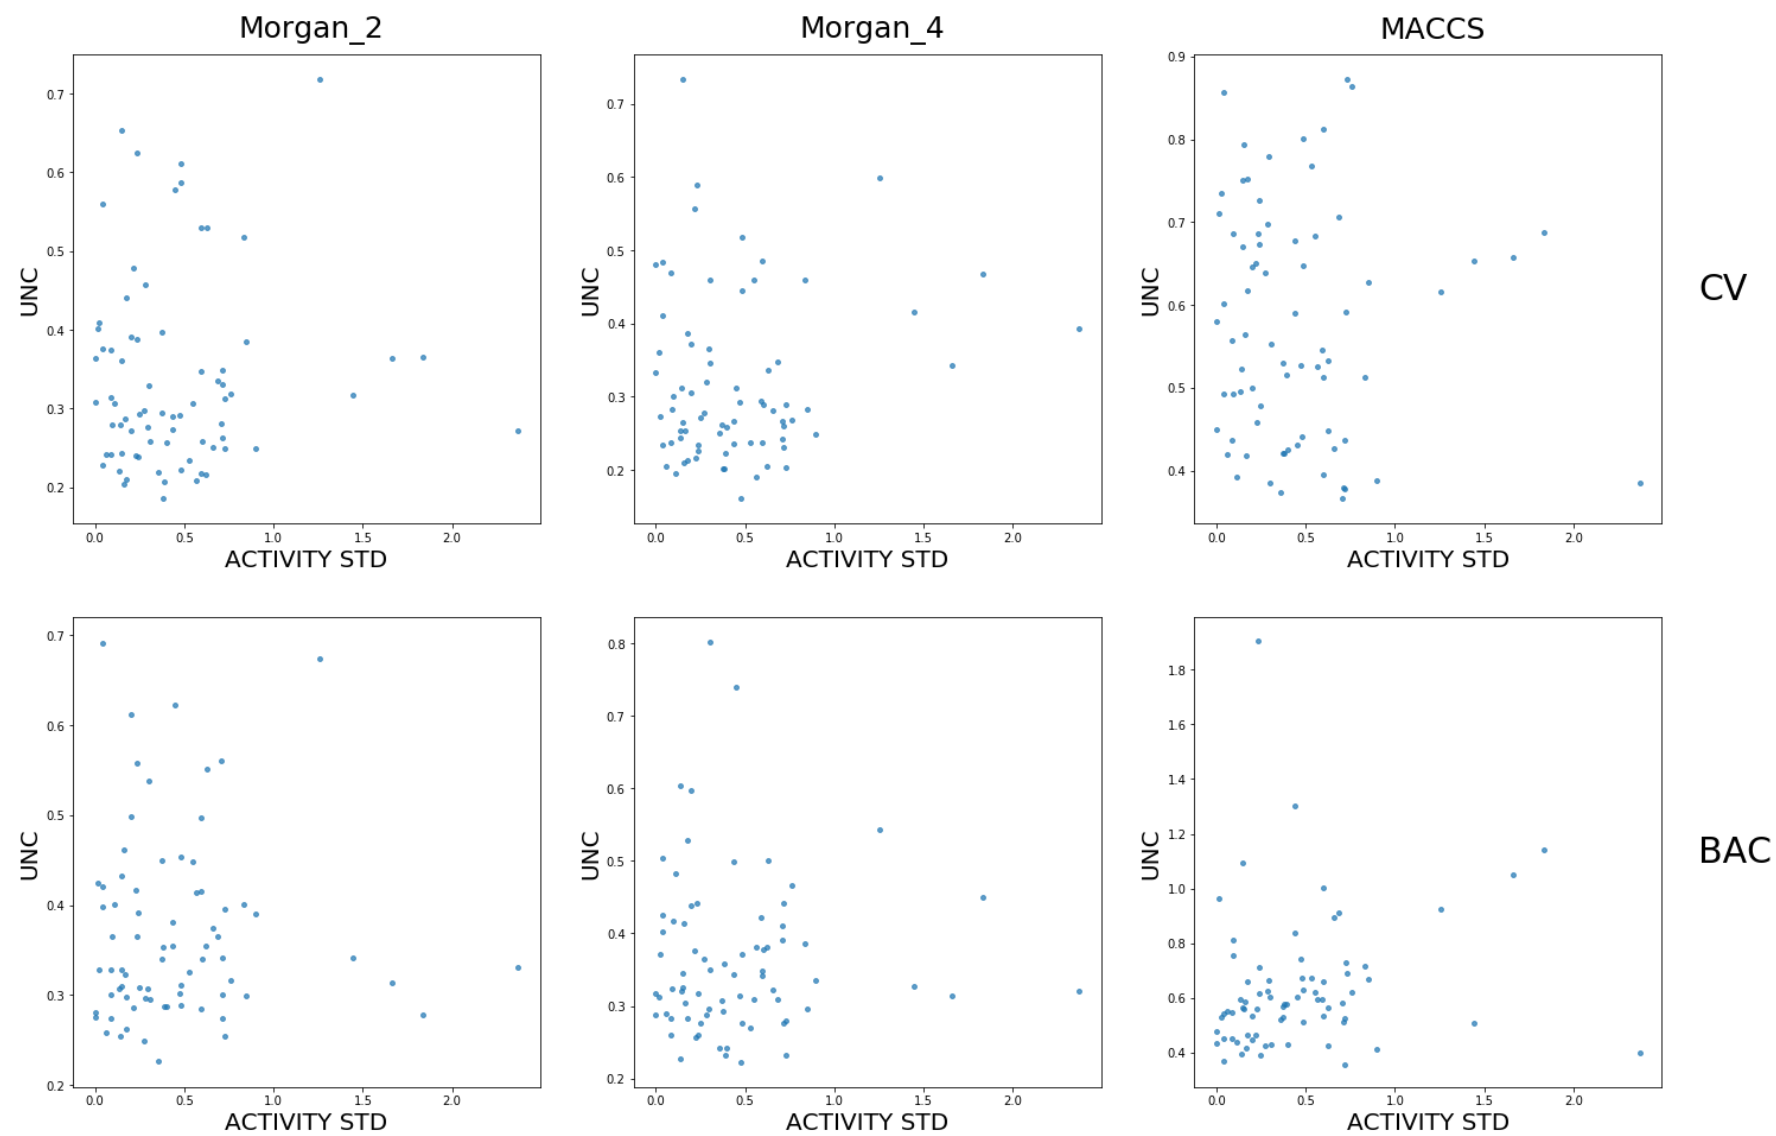

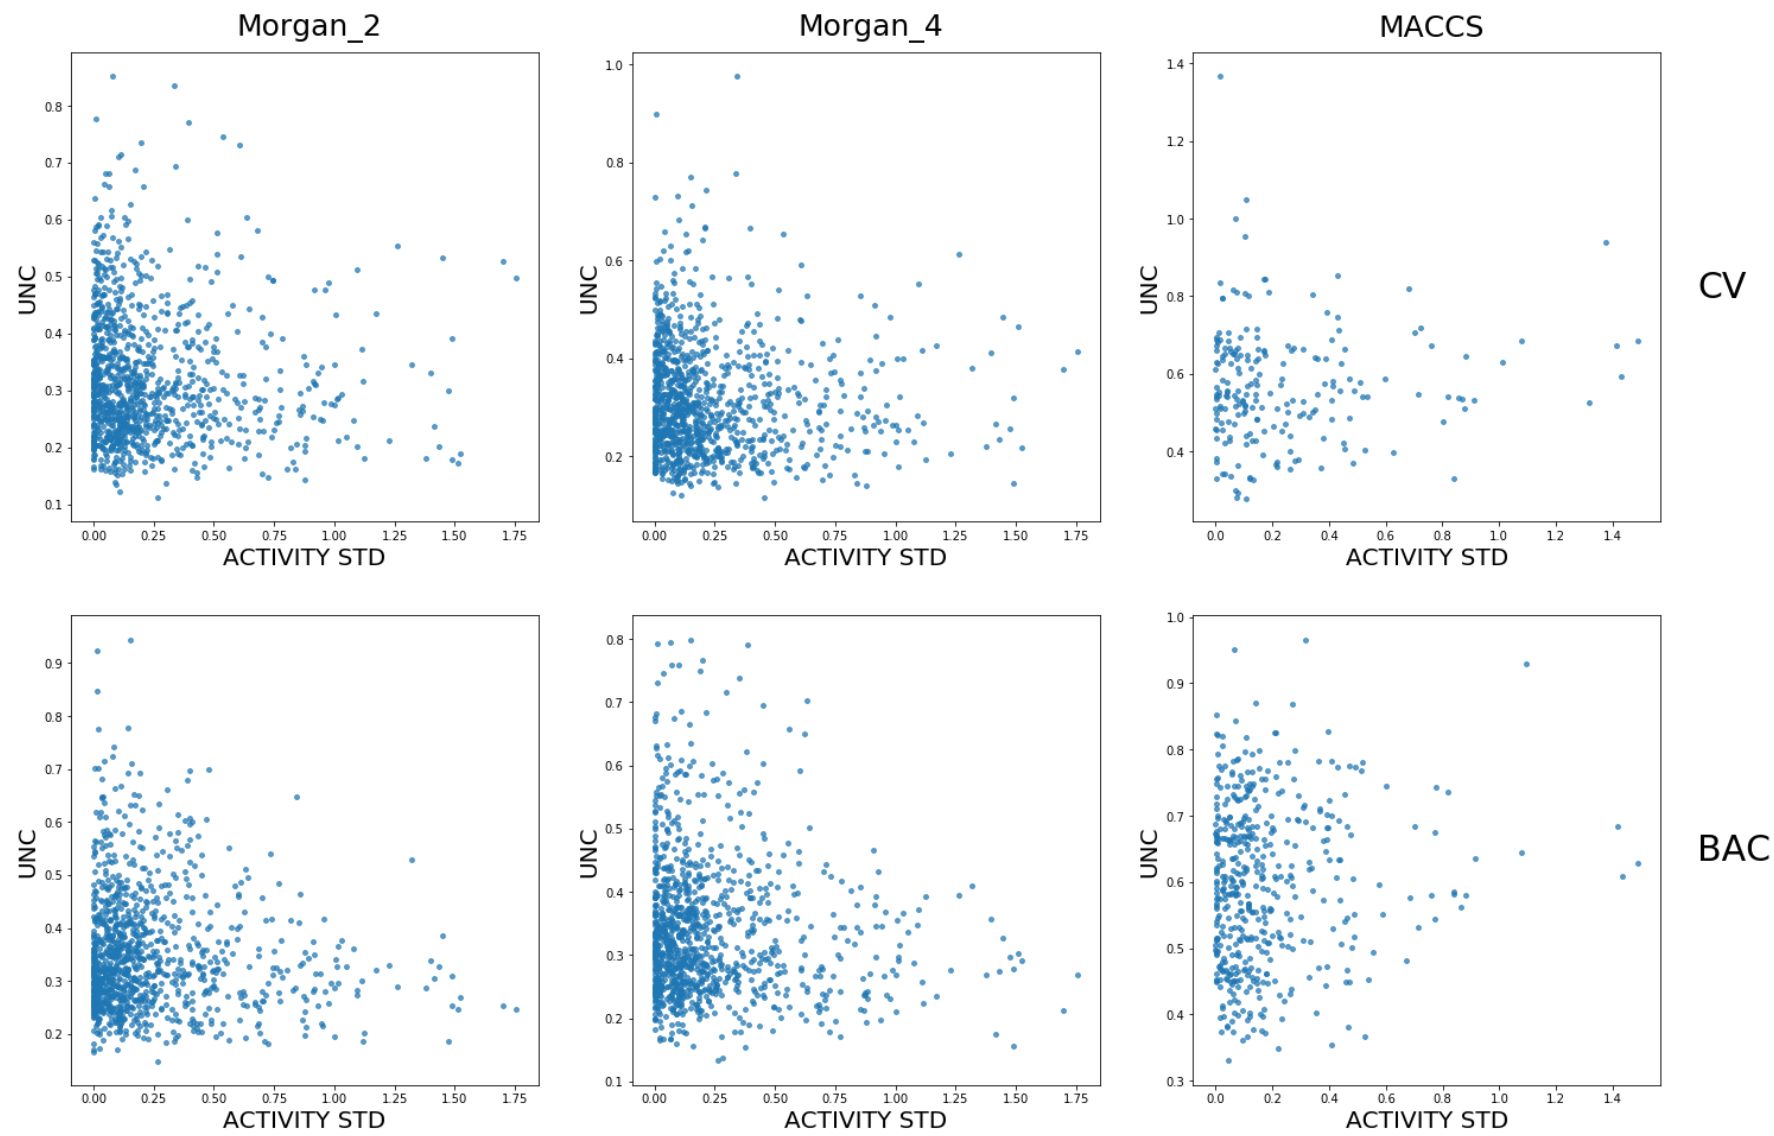

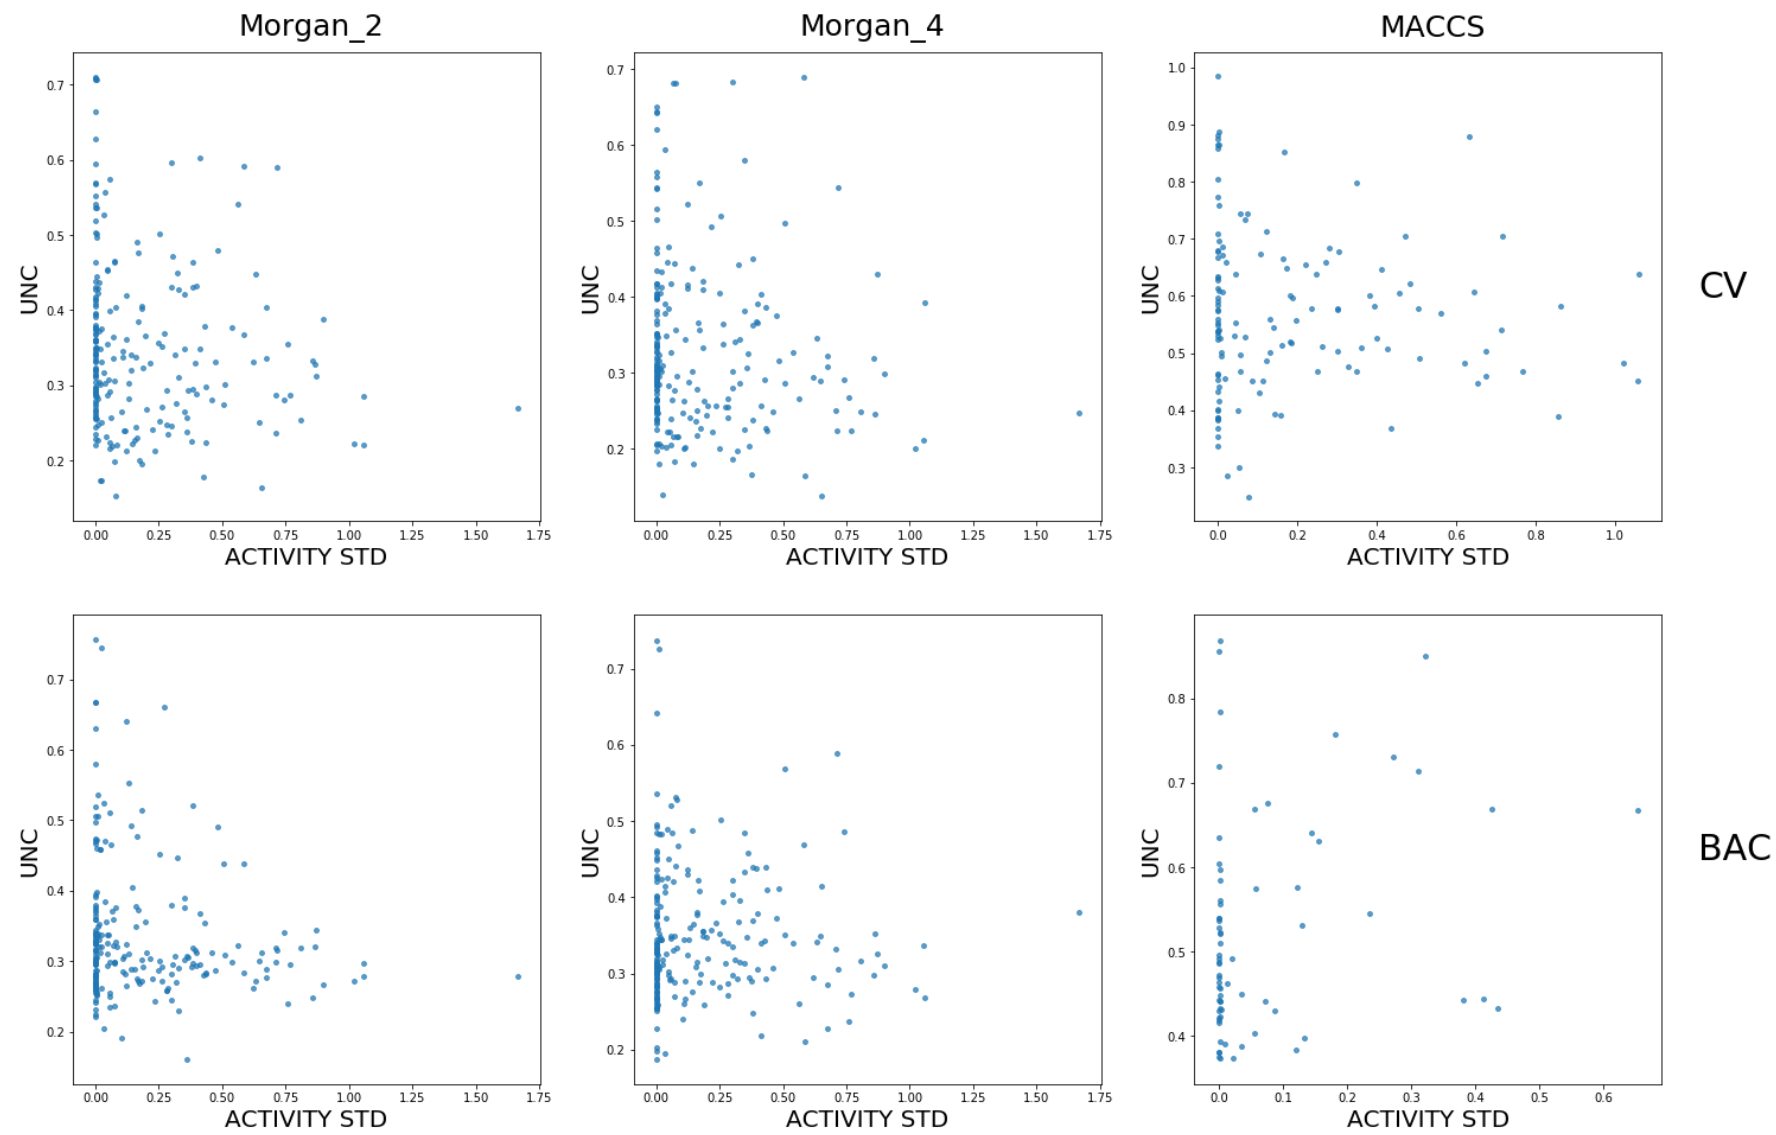

CHEMBL225

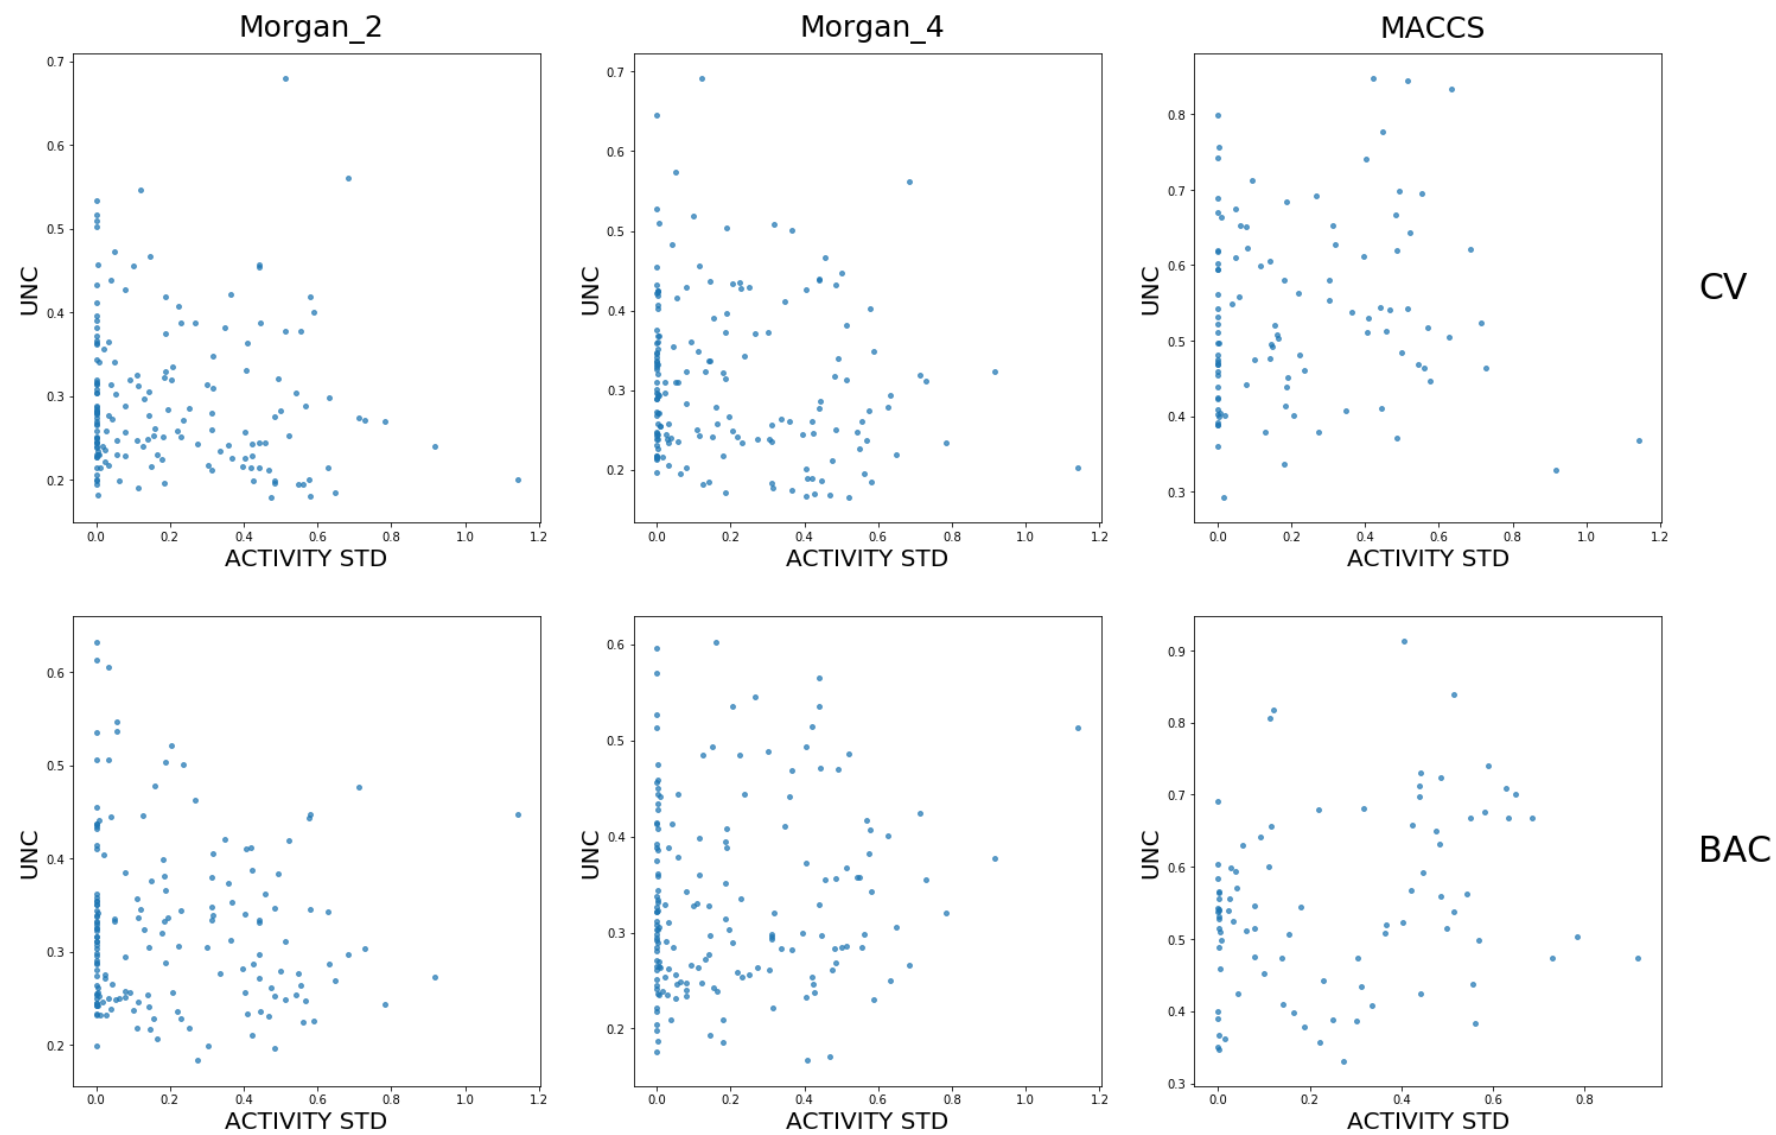

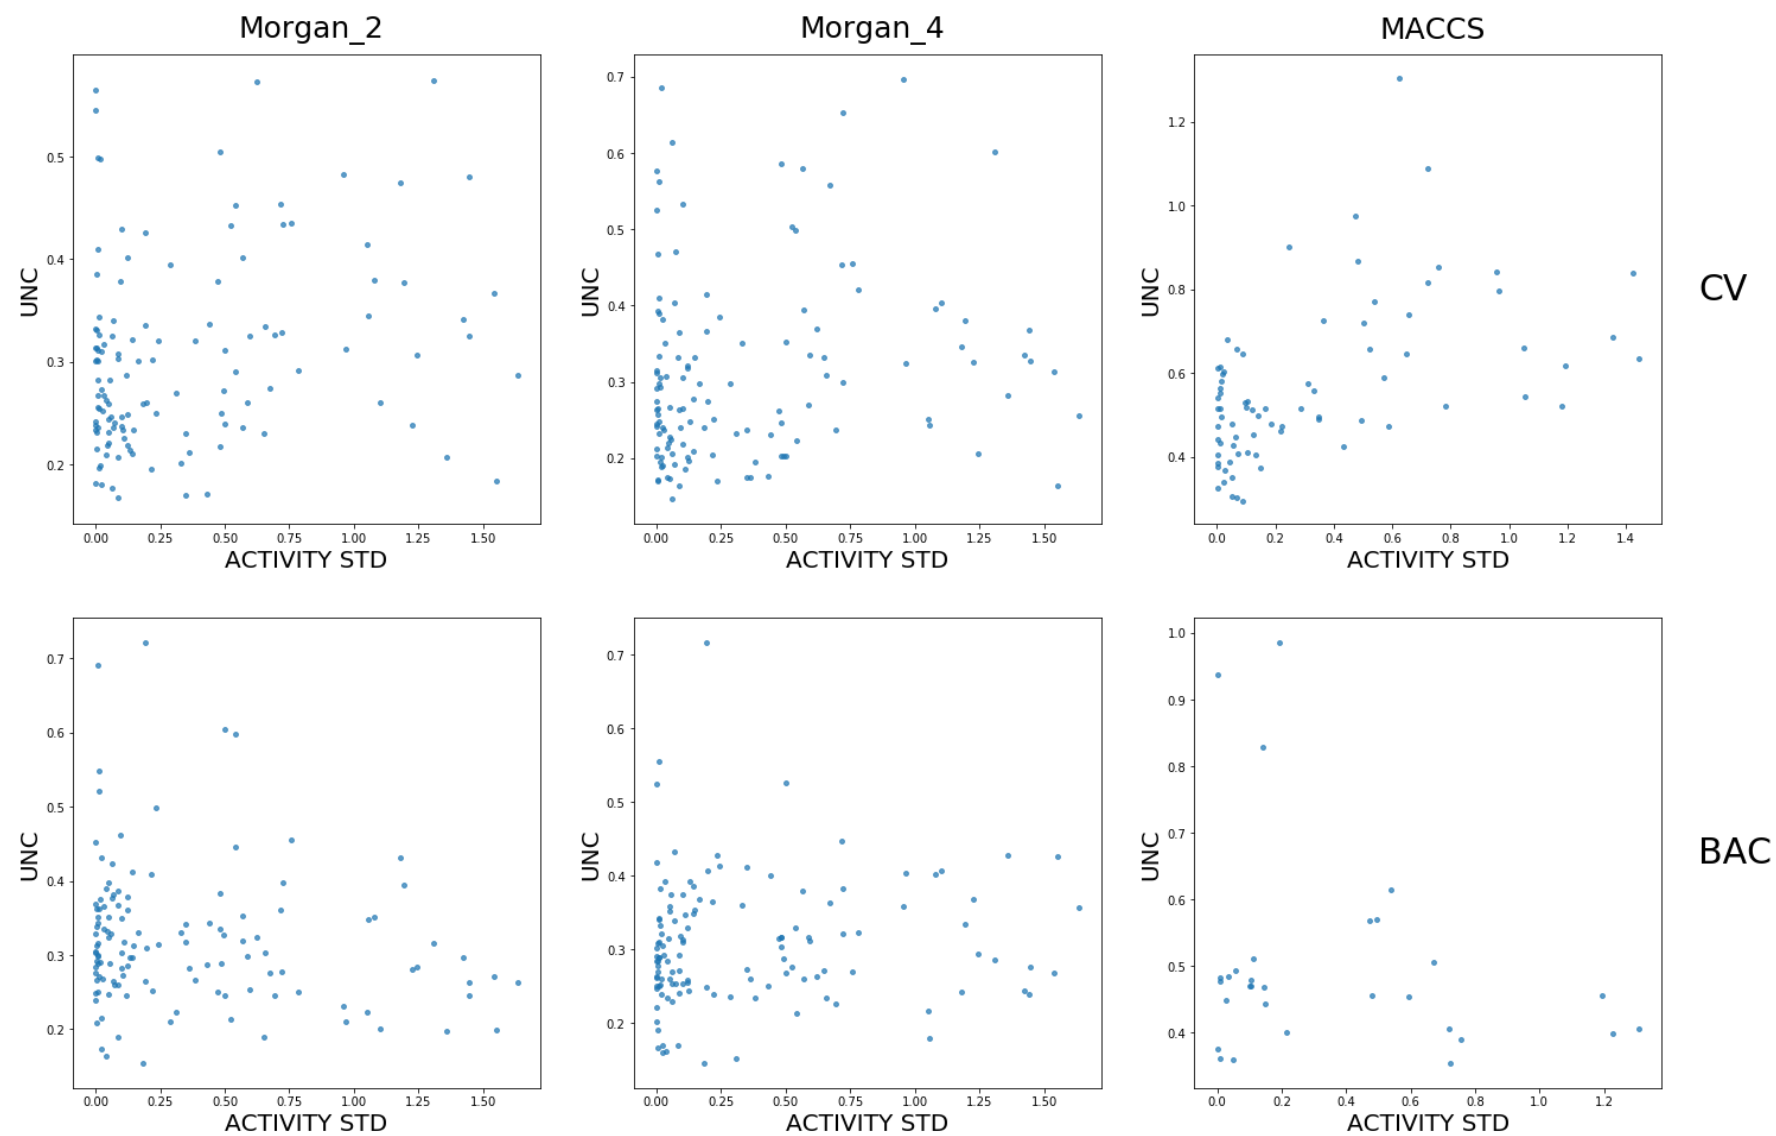

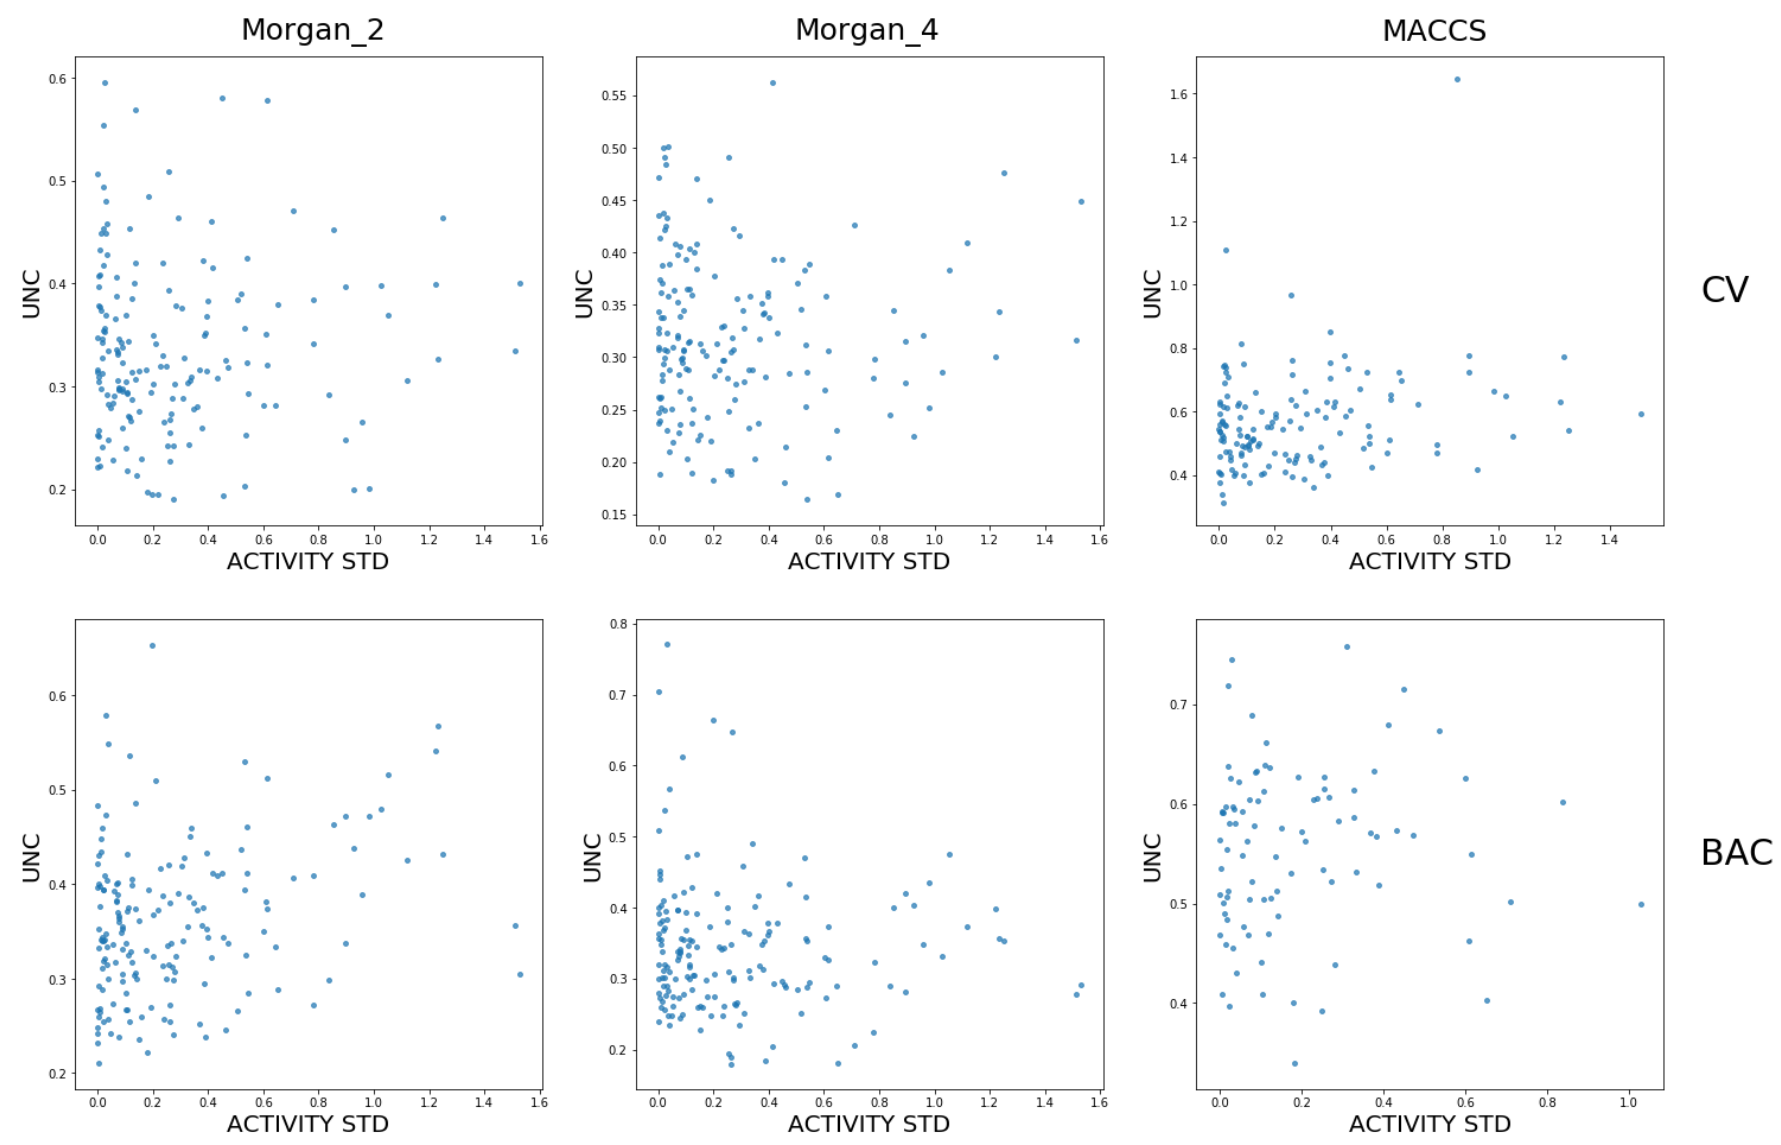

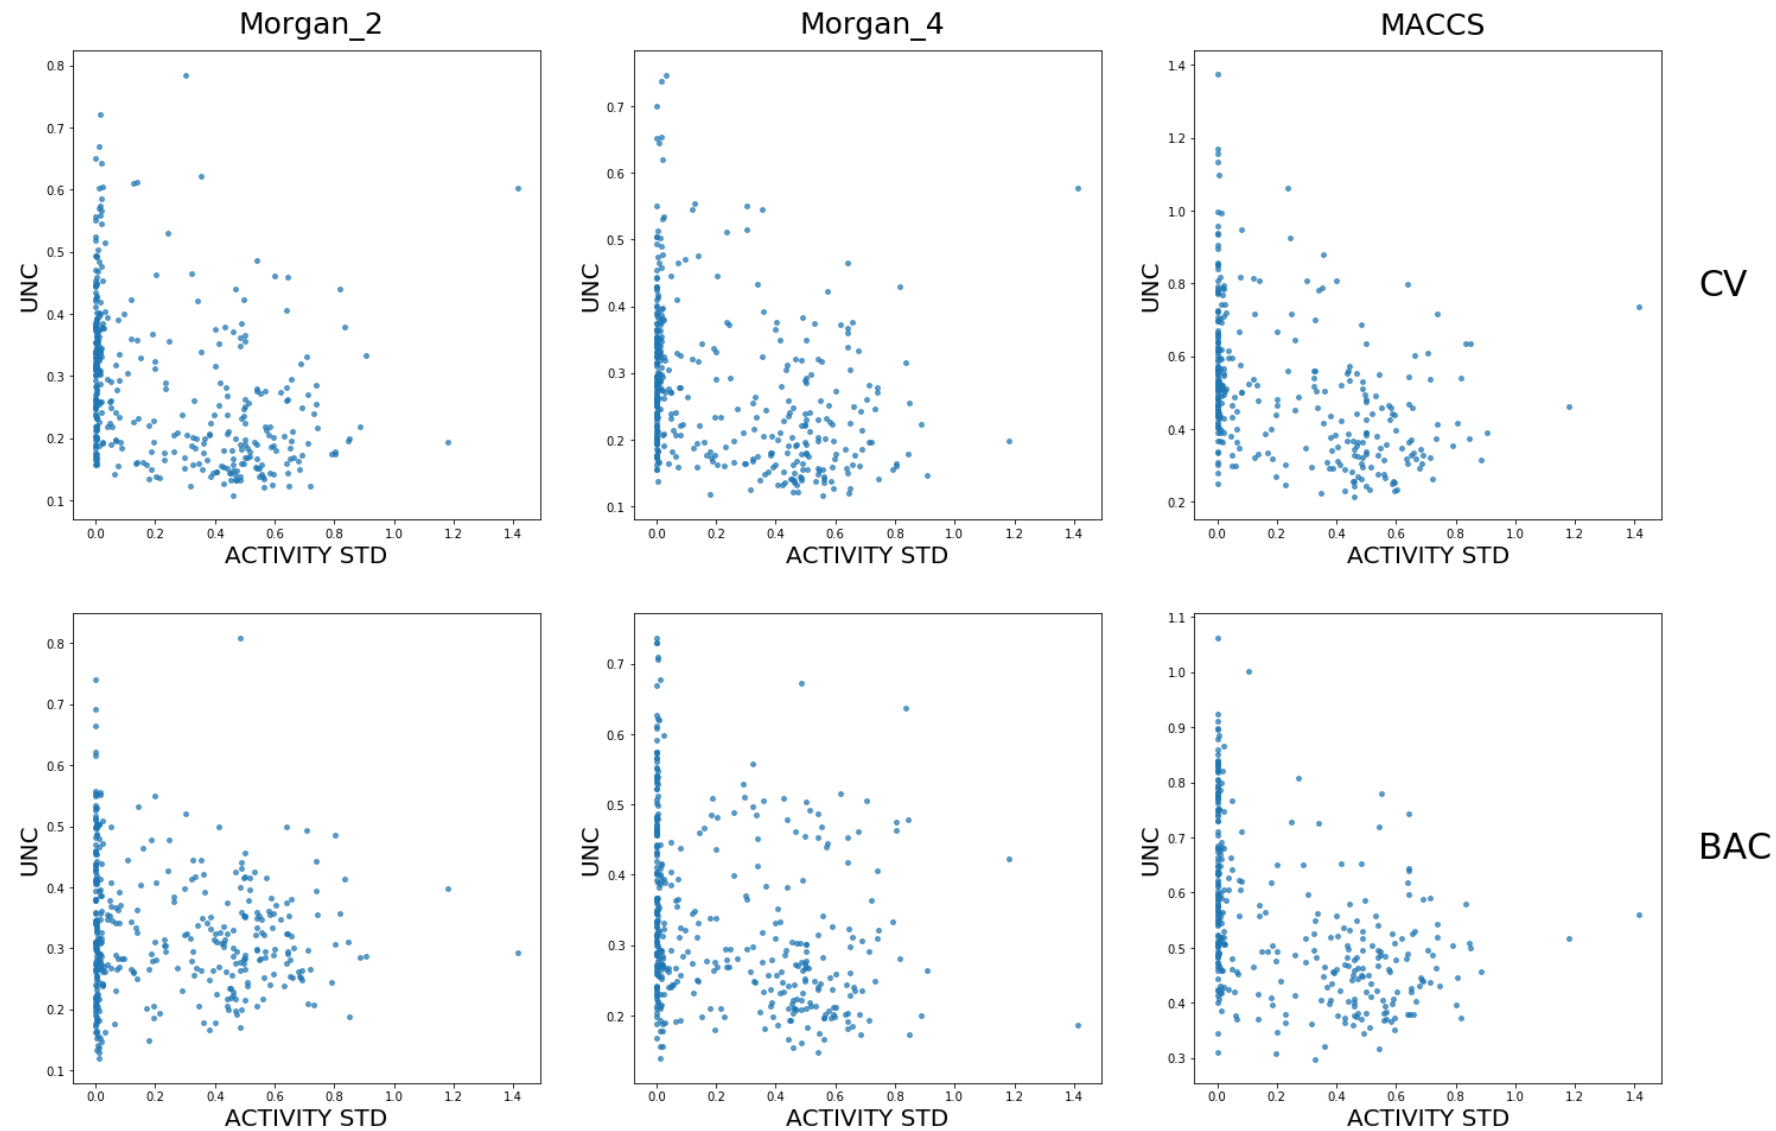



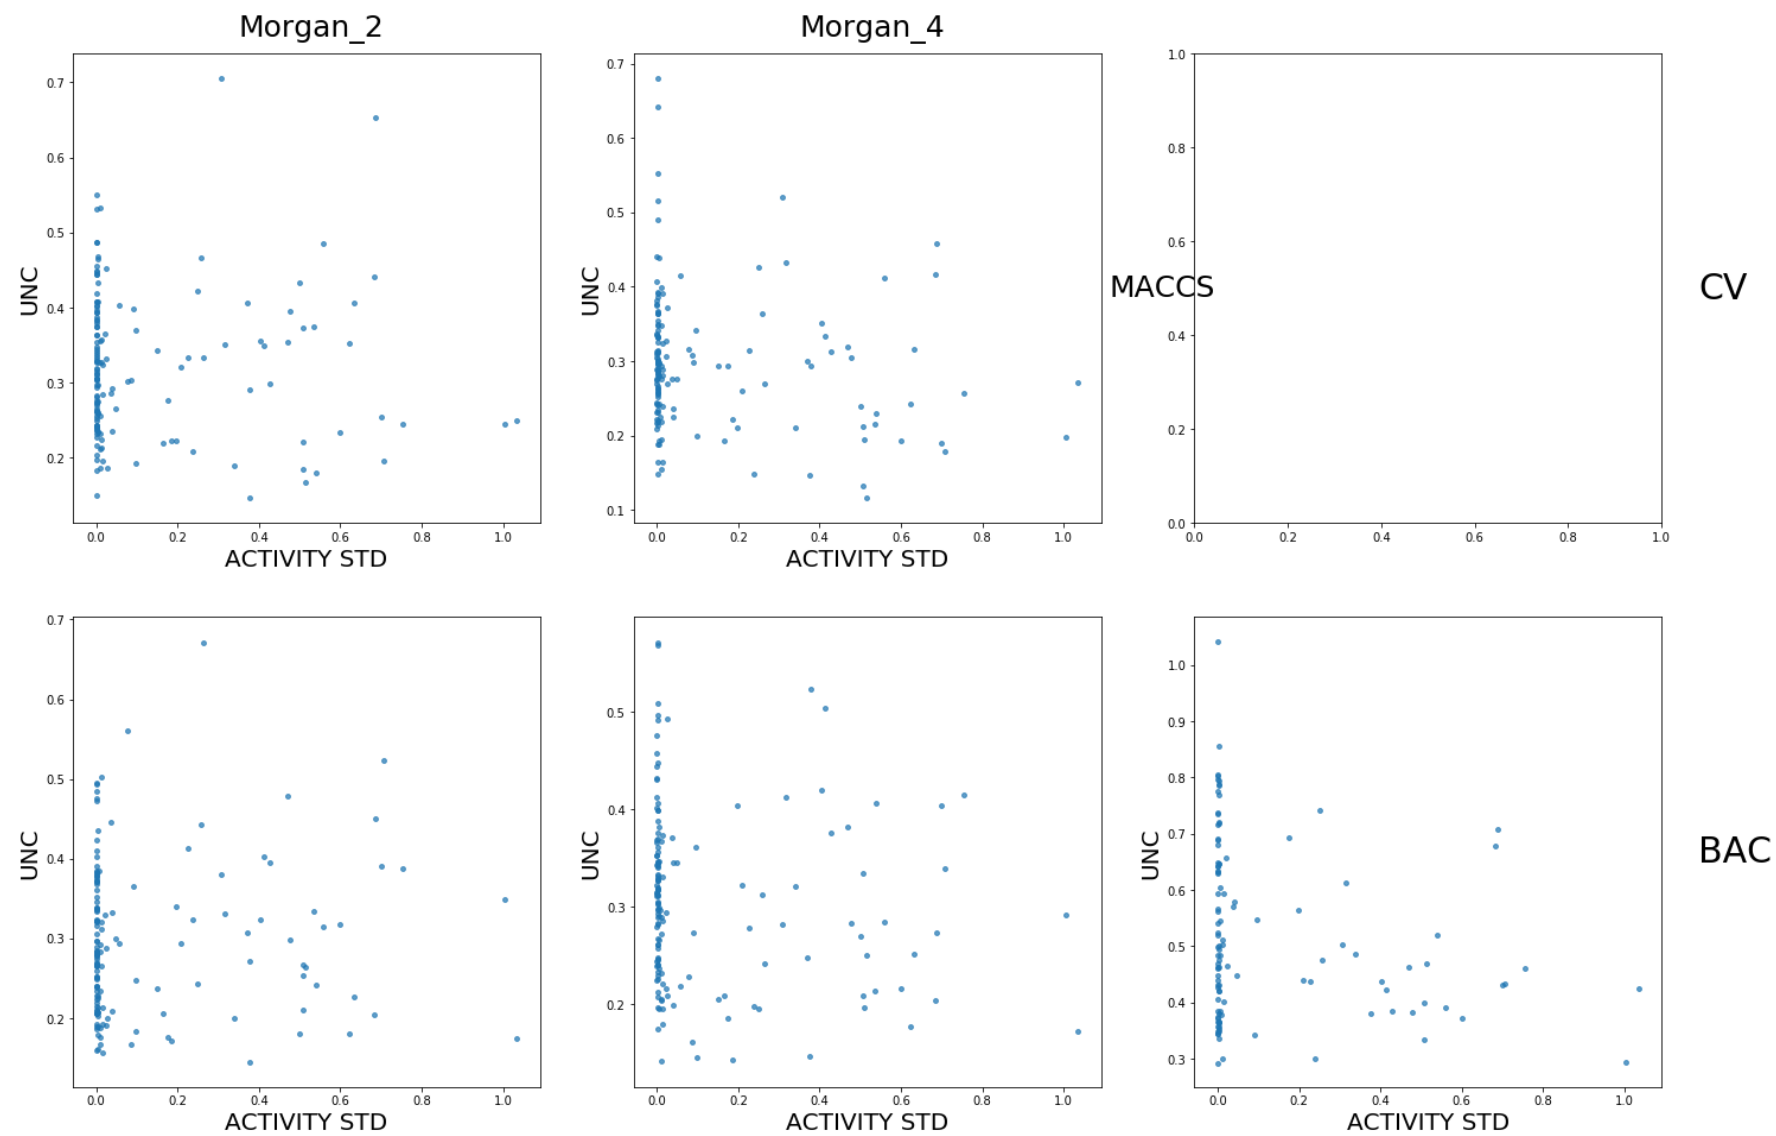

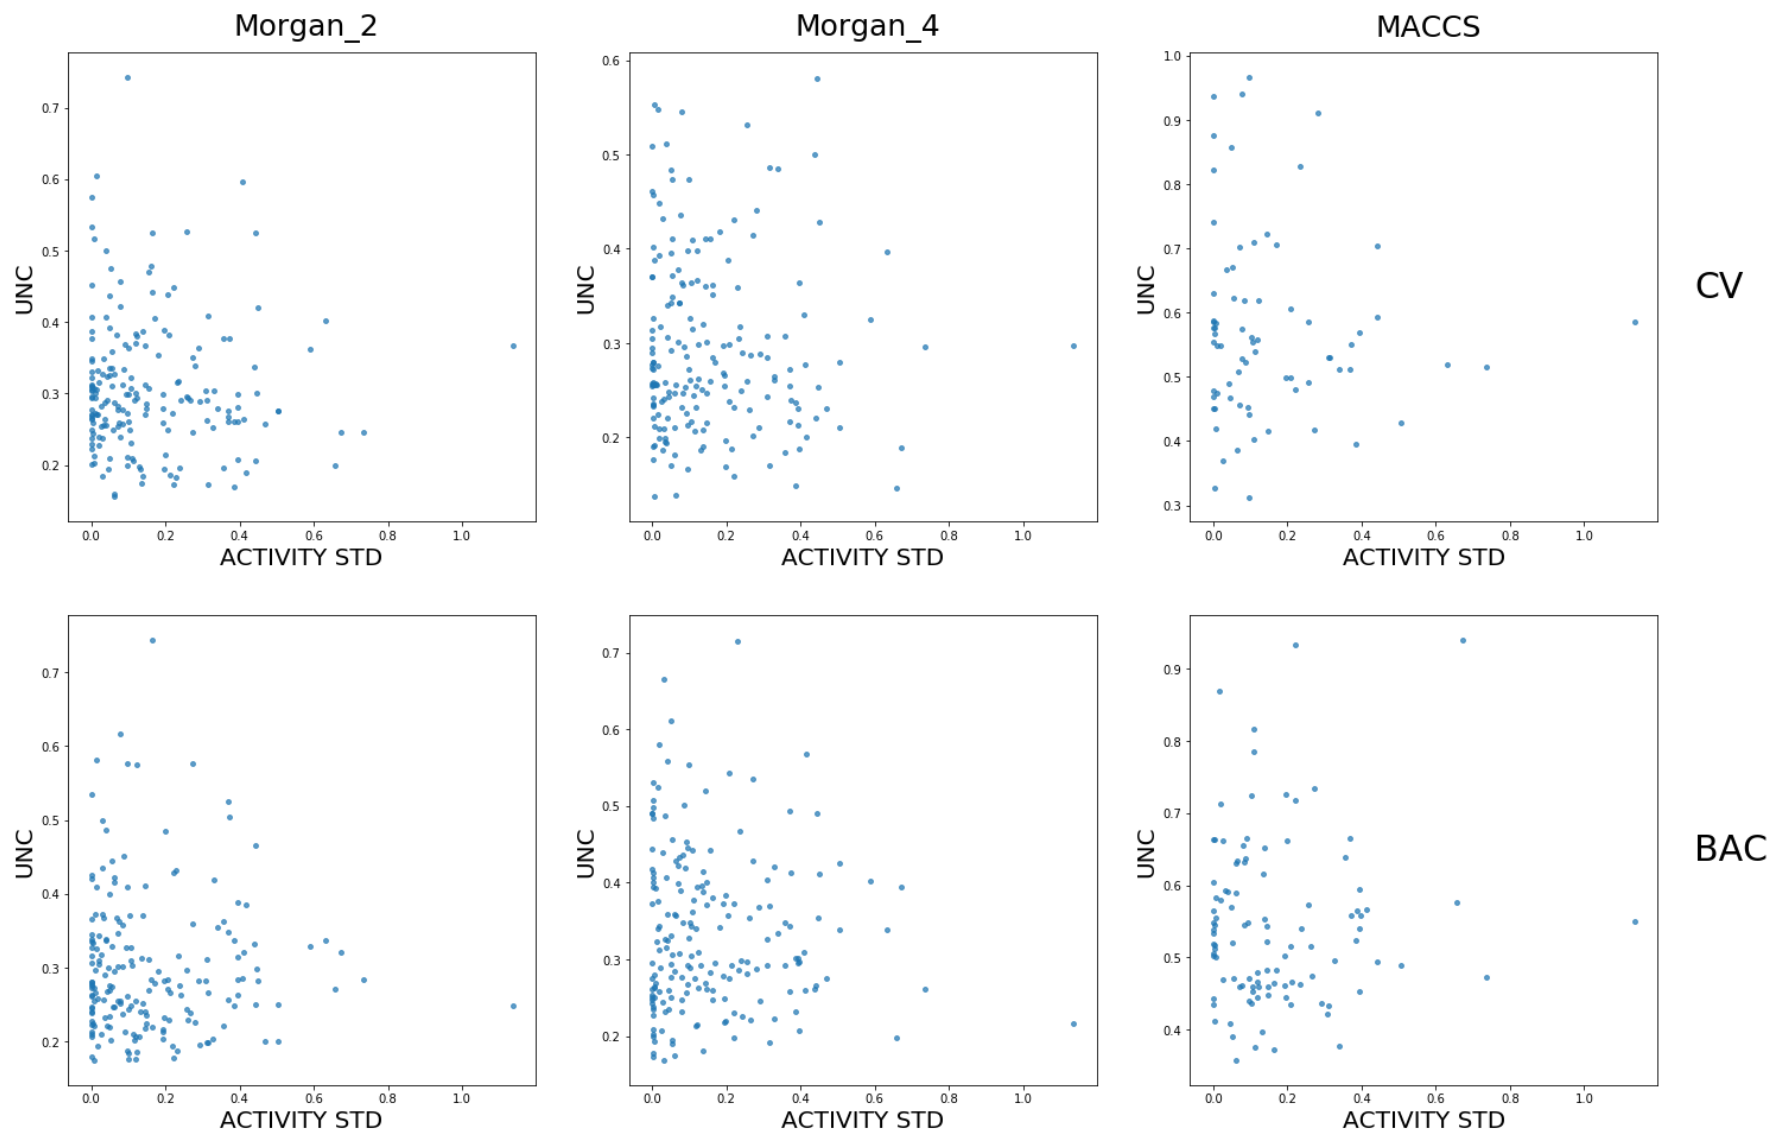

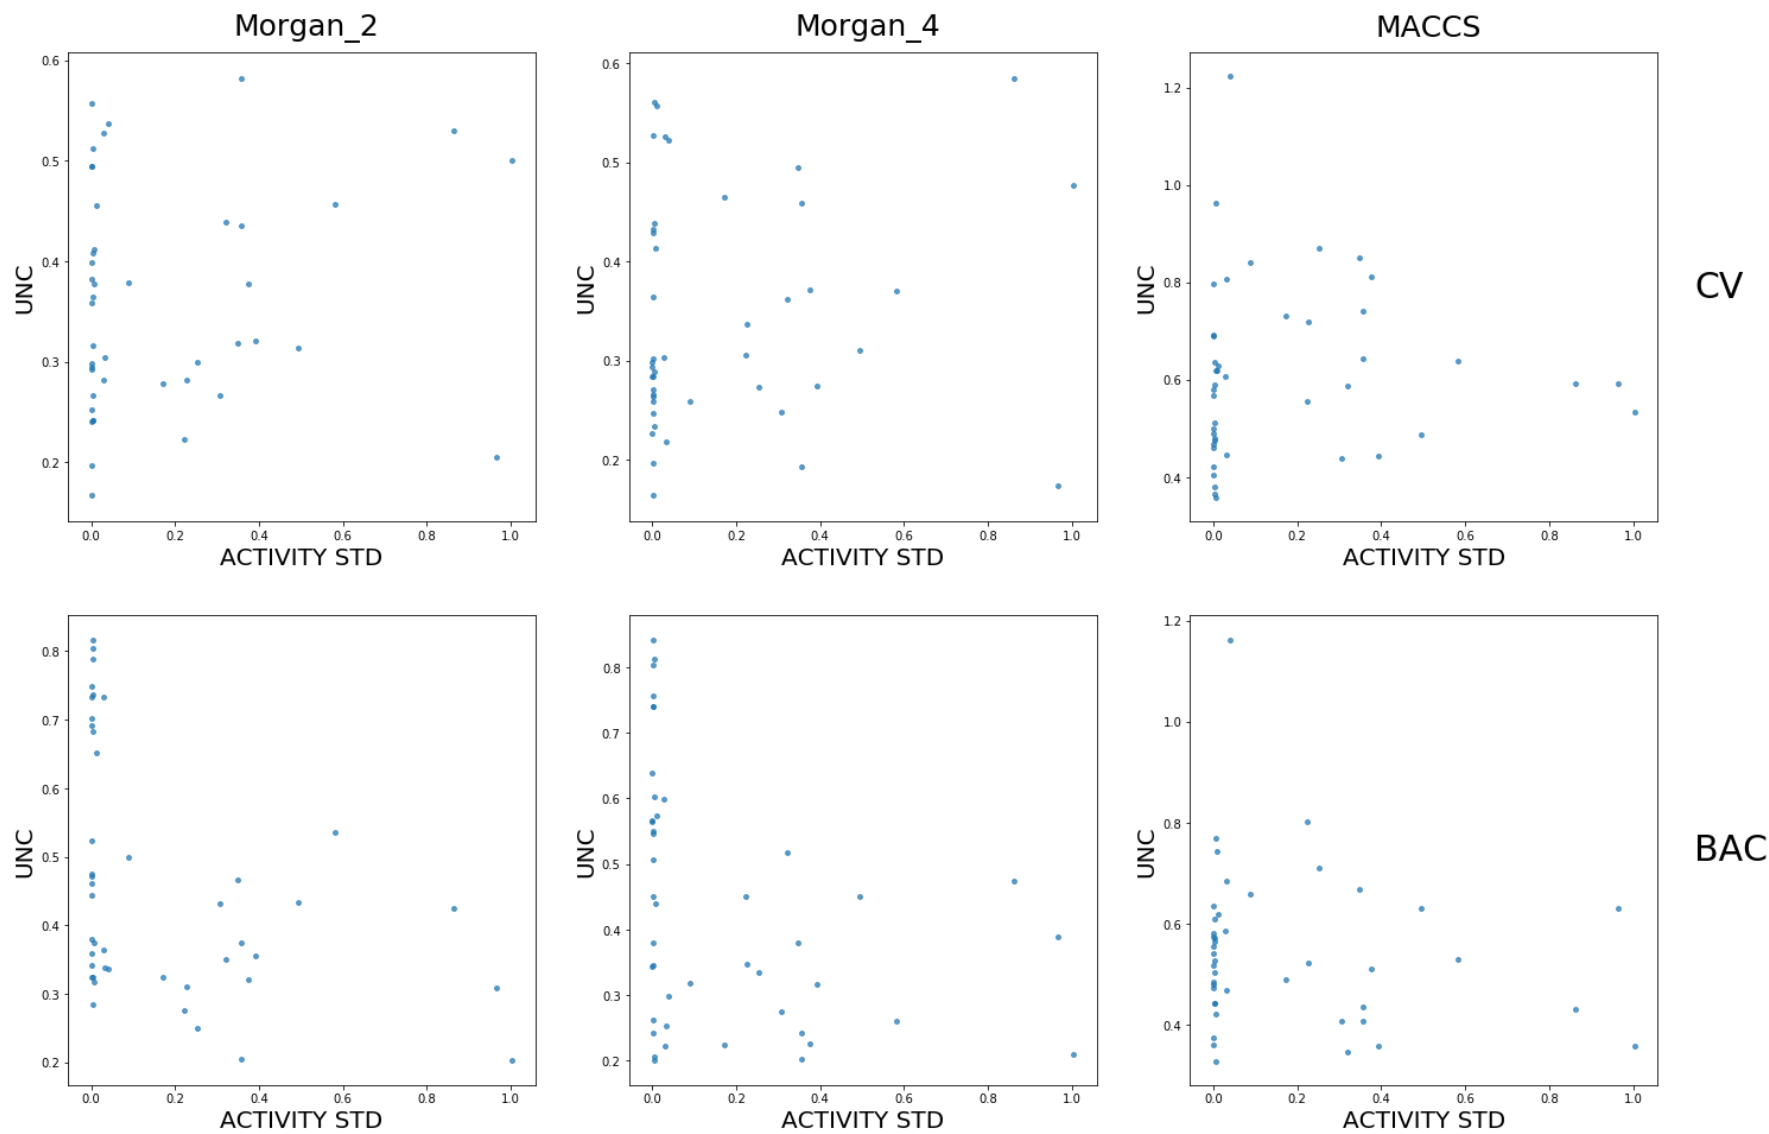

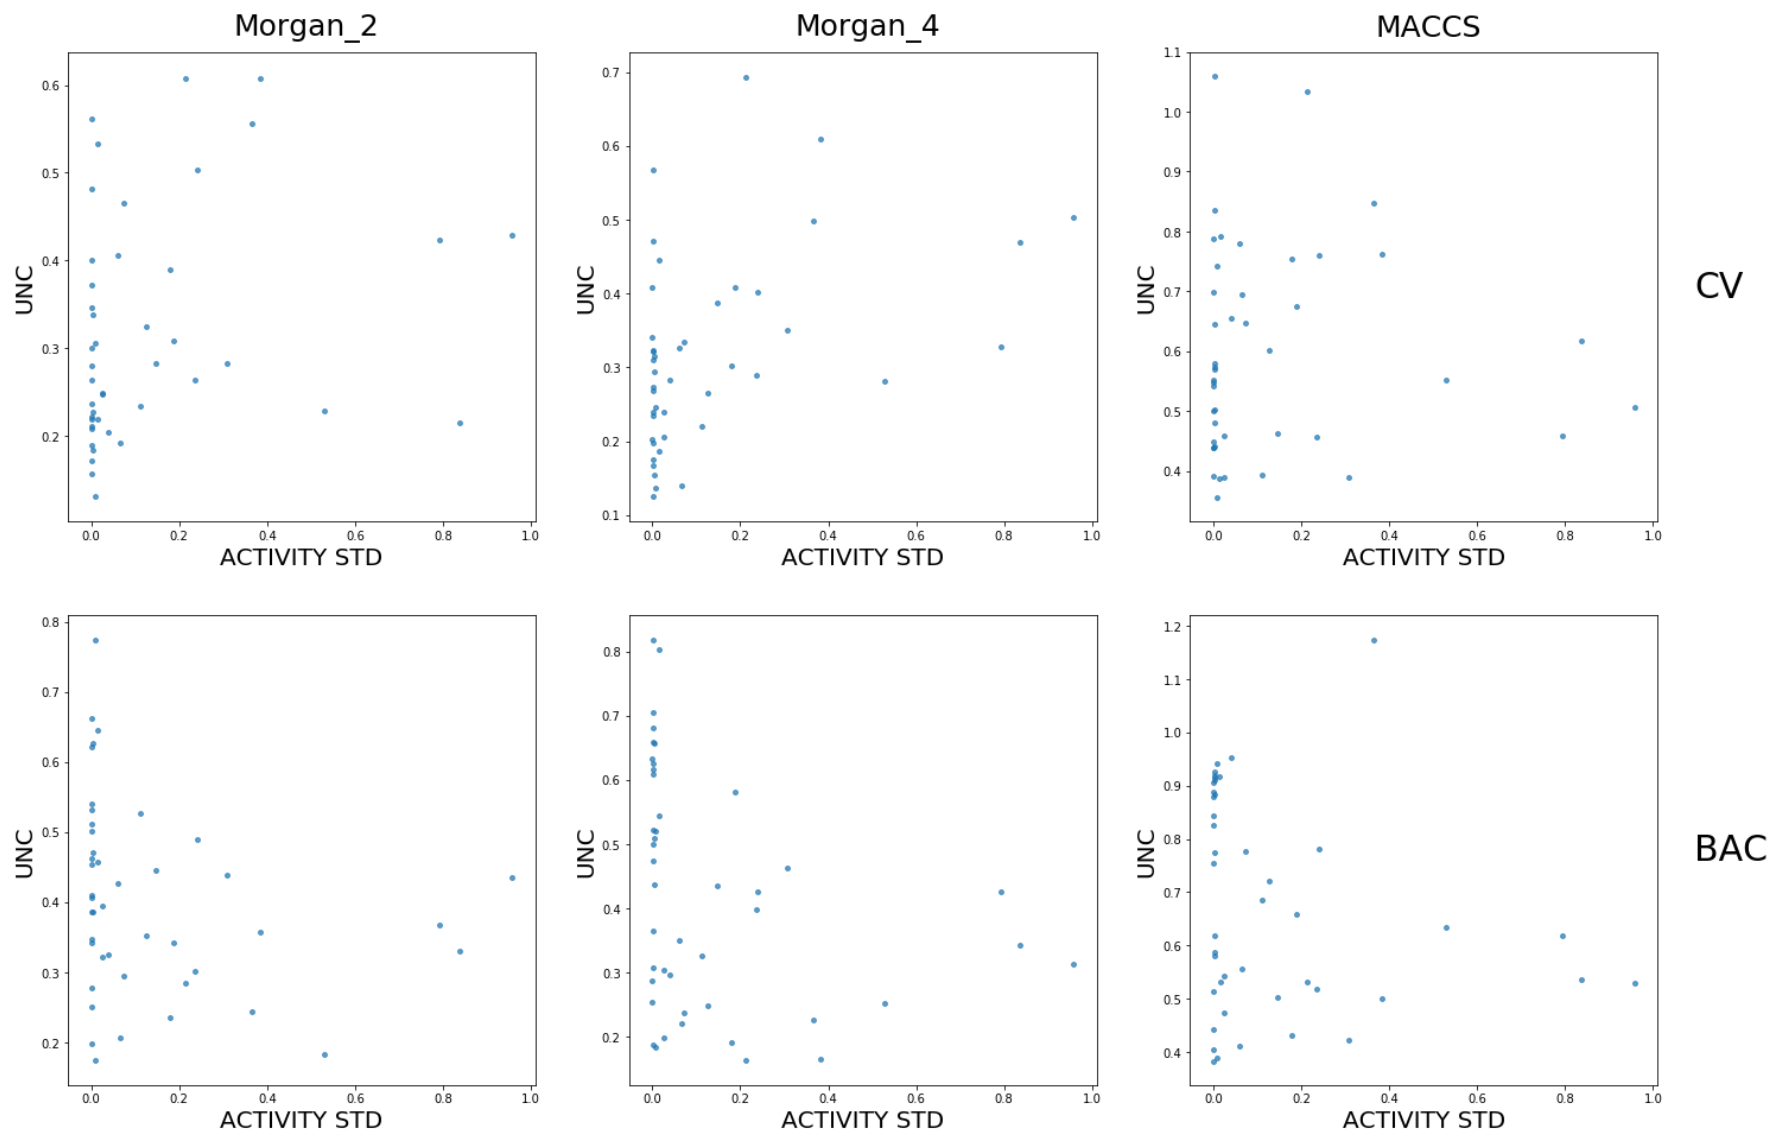

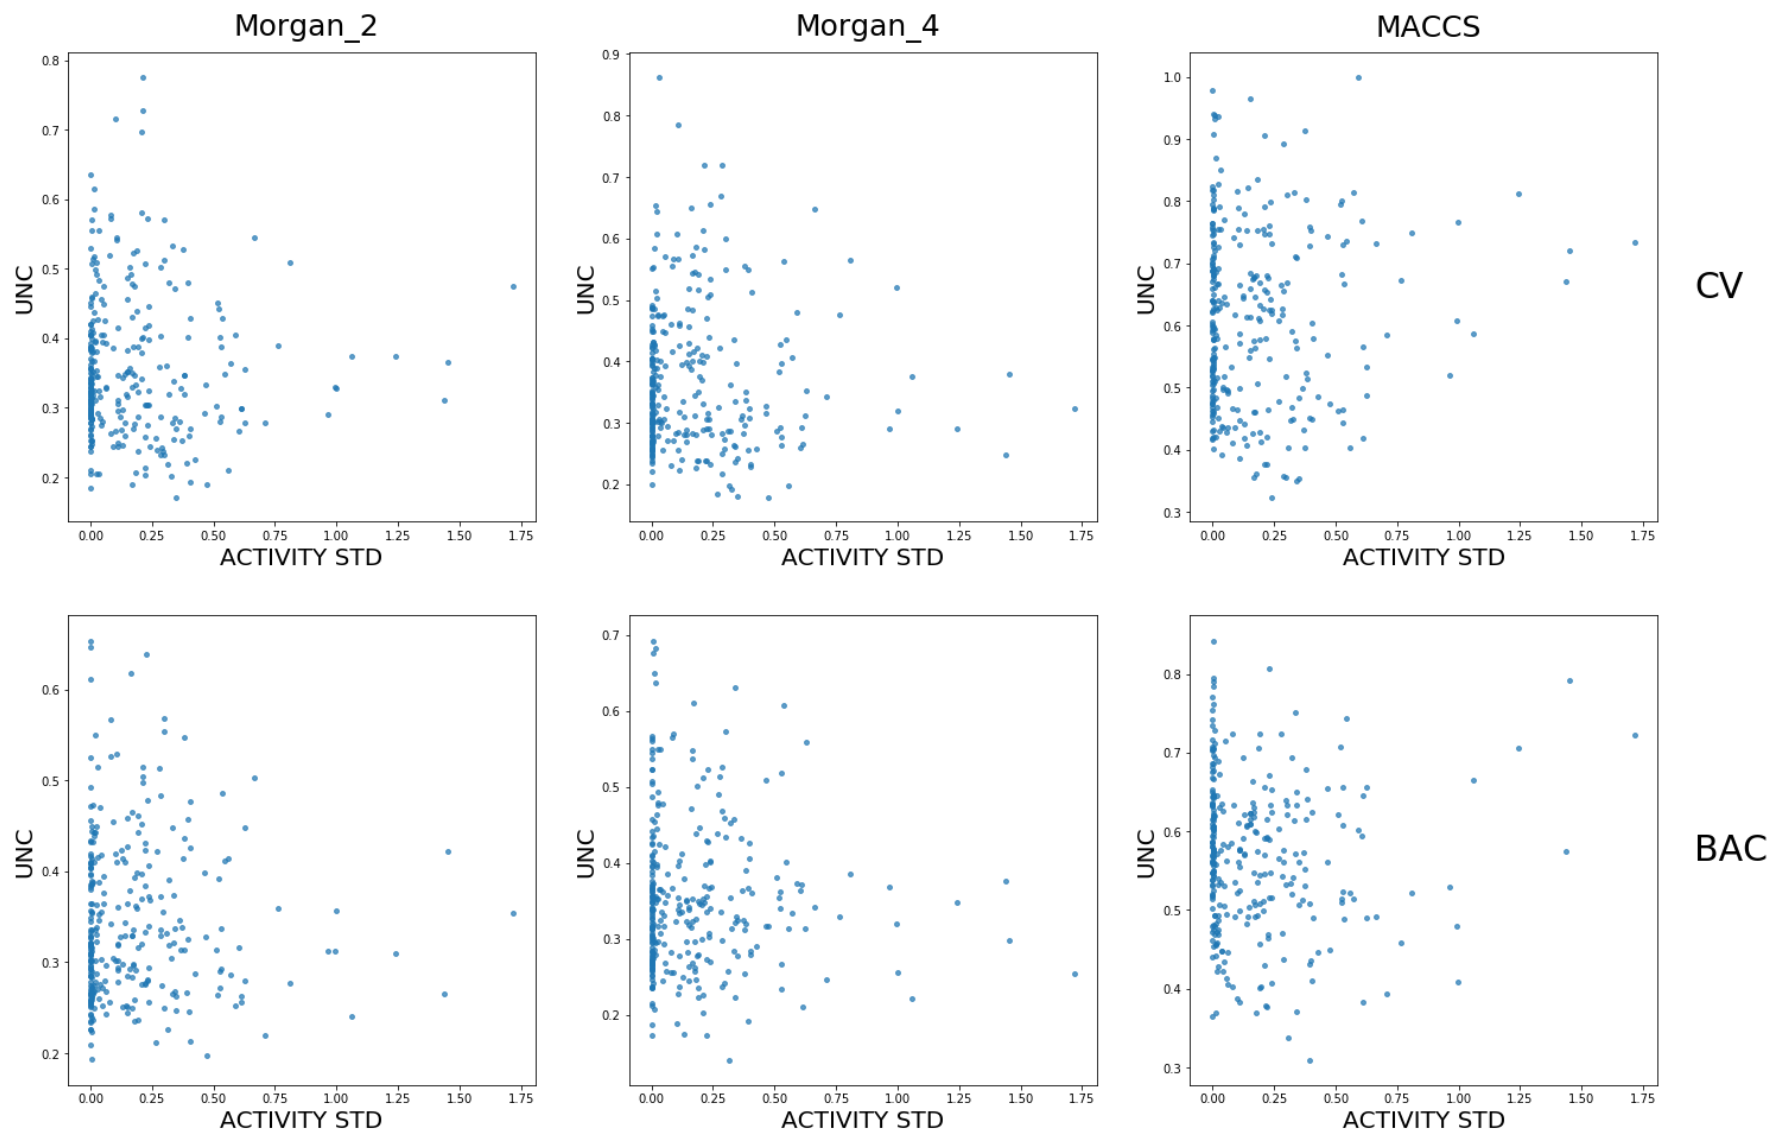

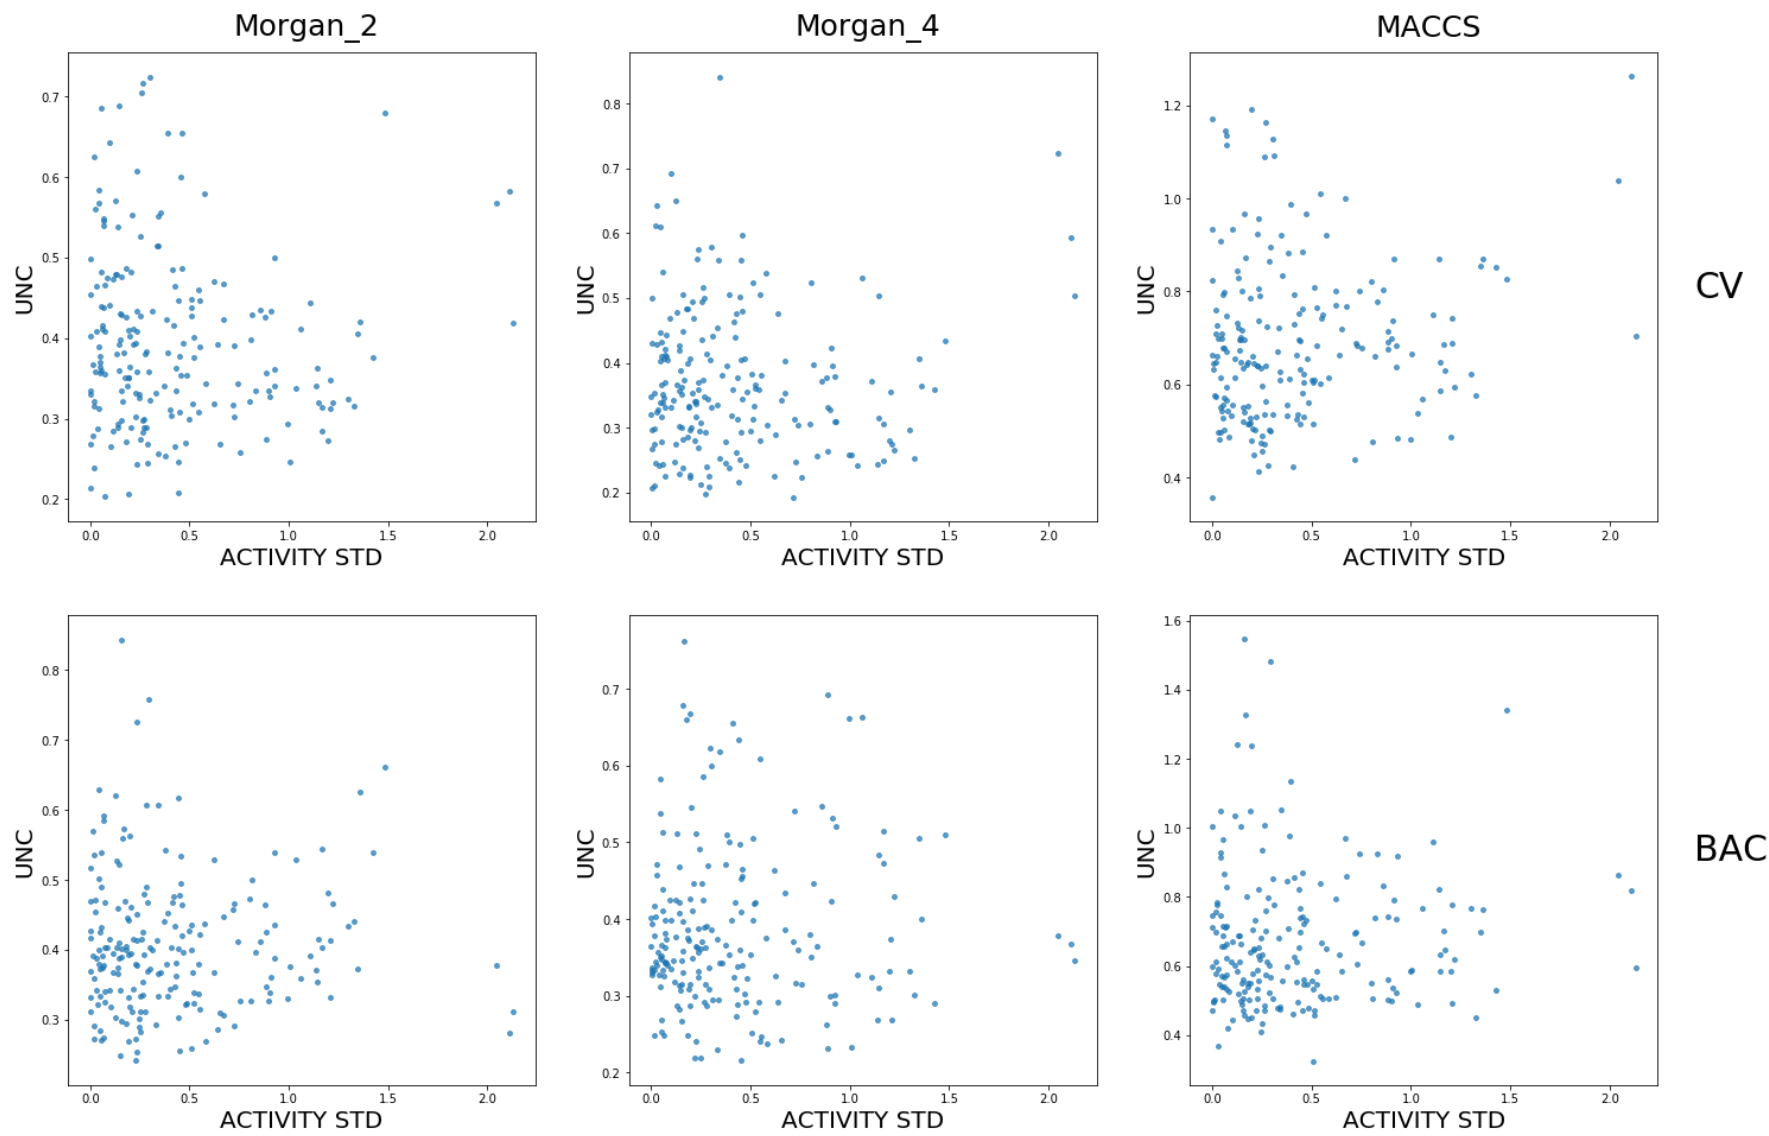

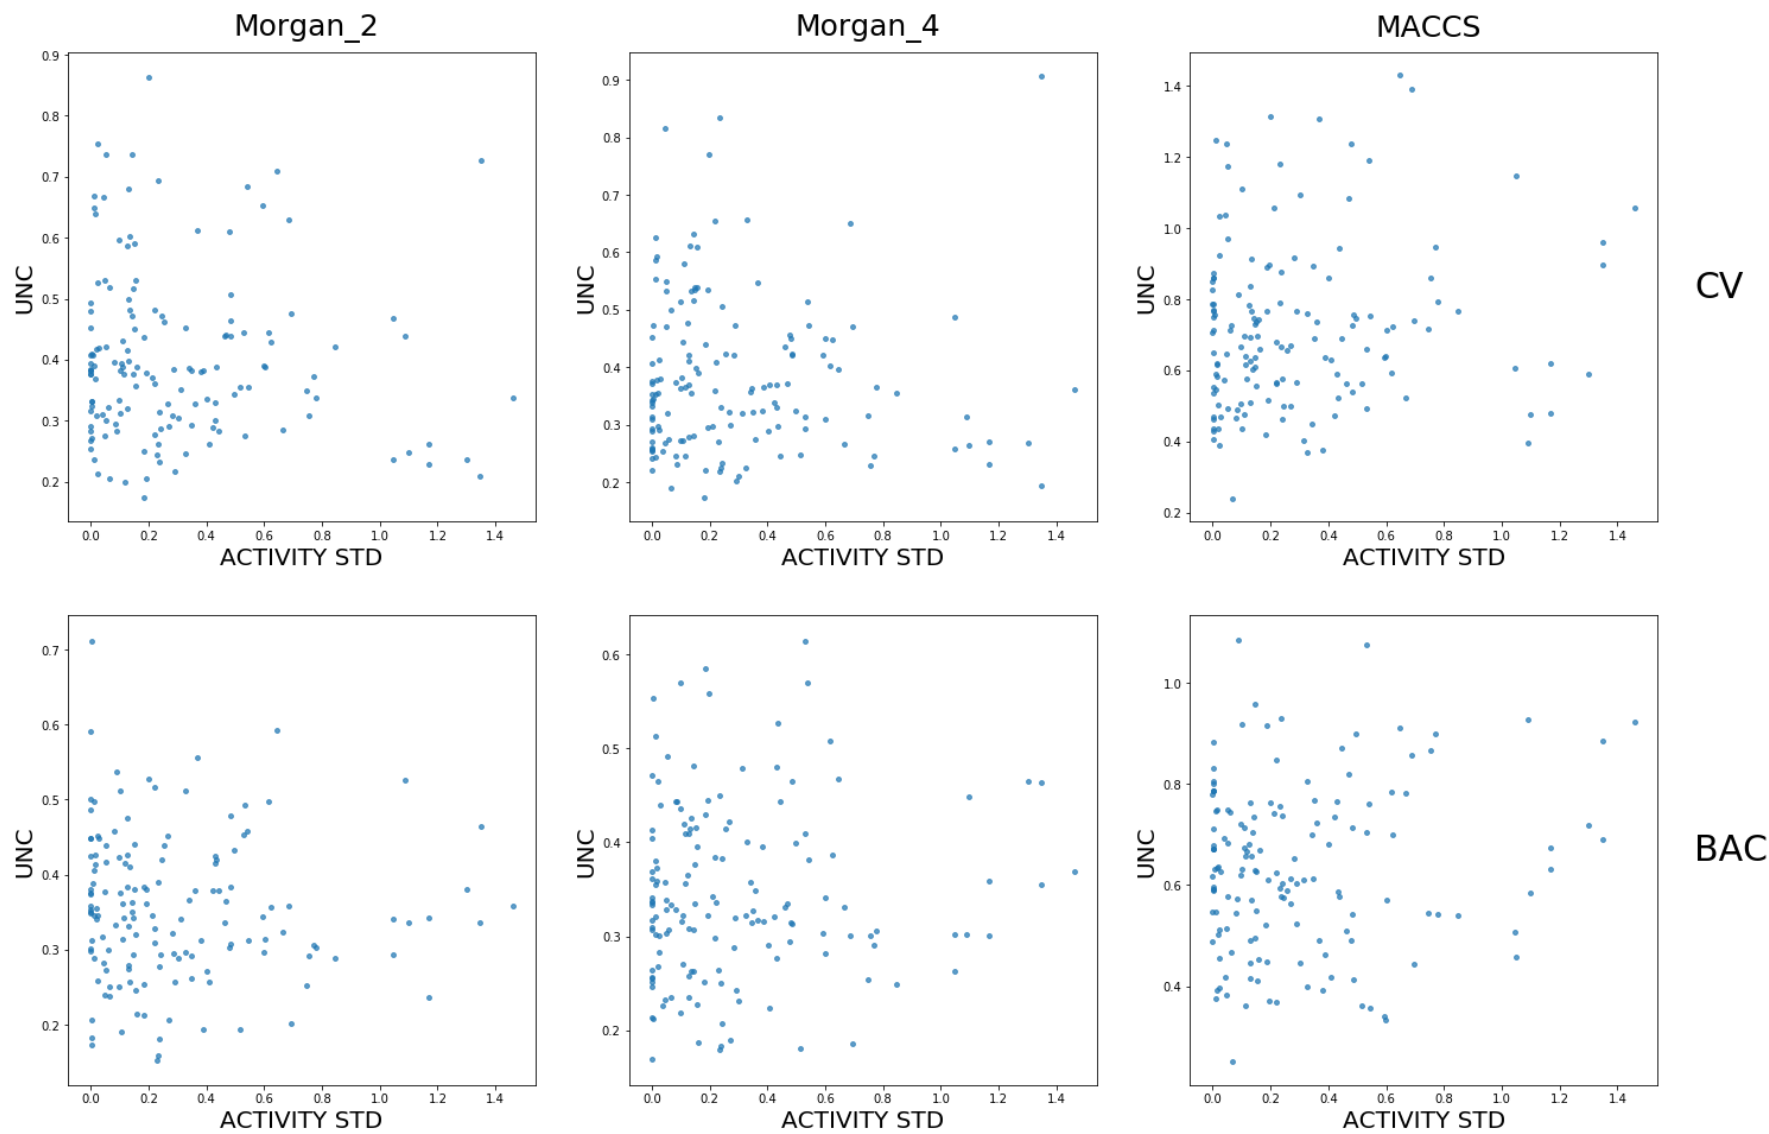

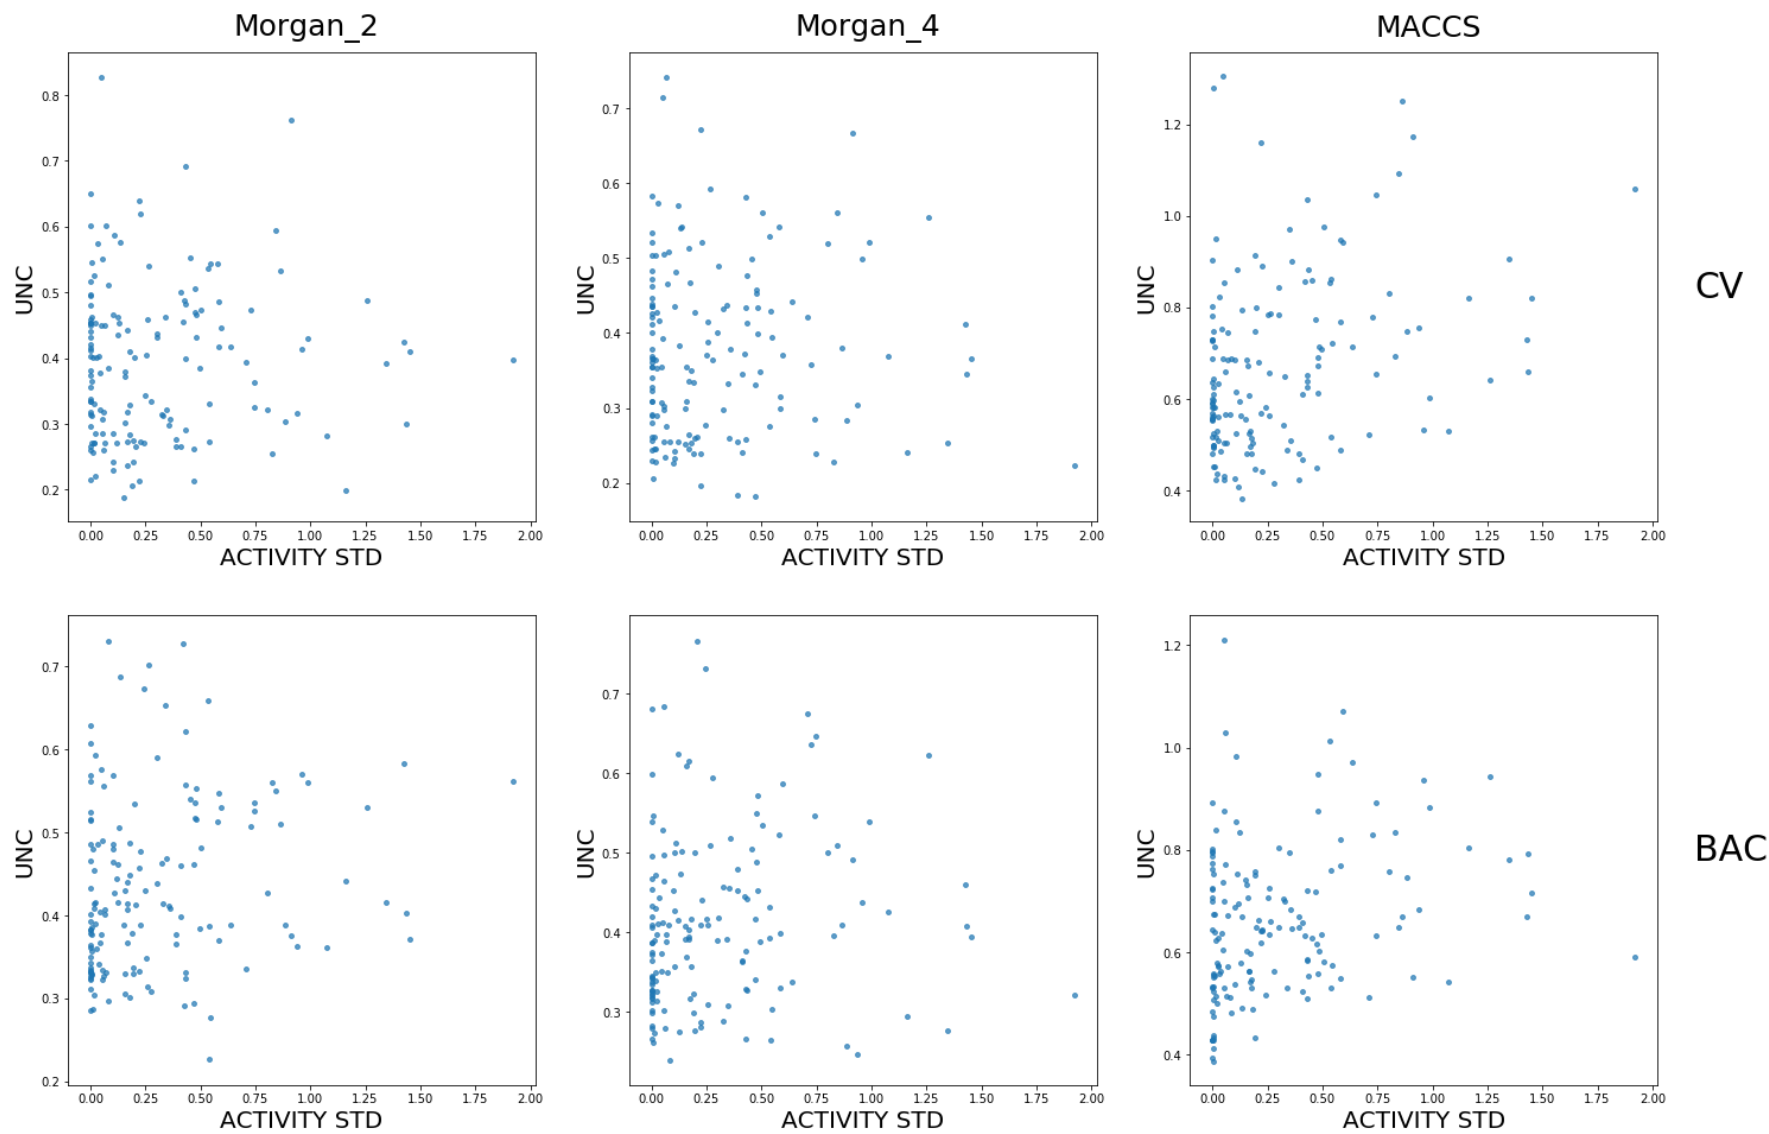



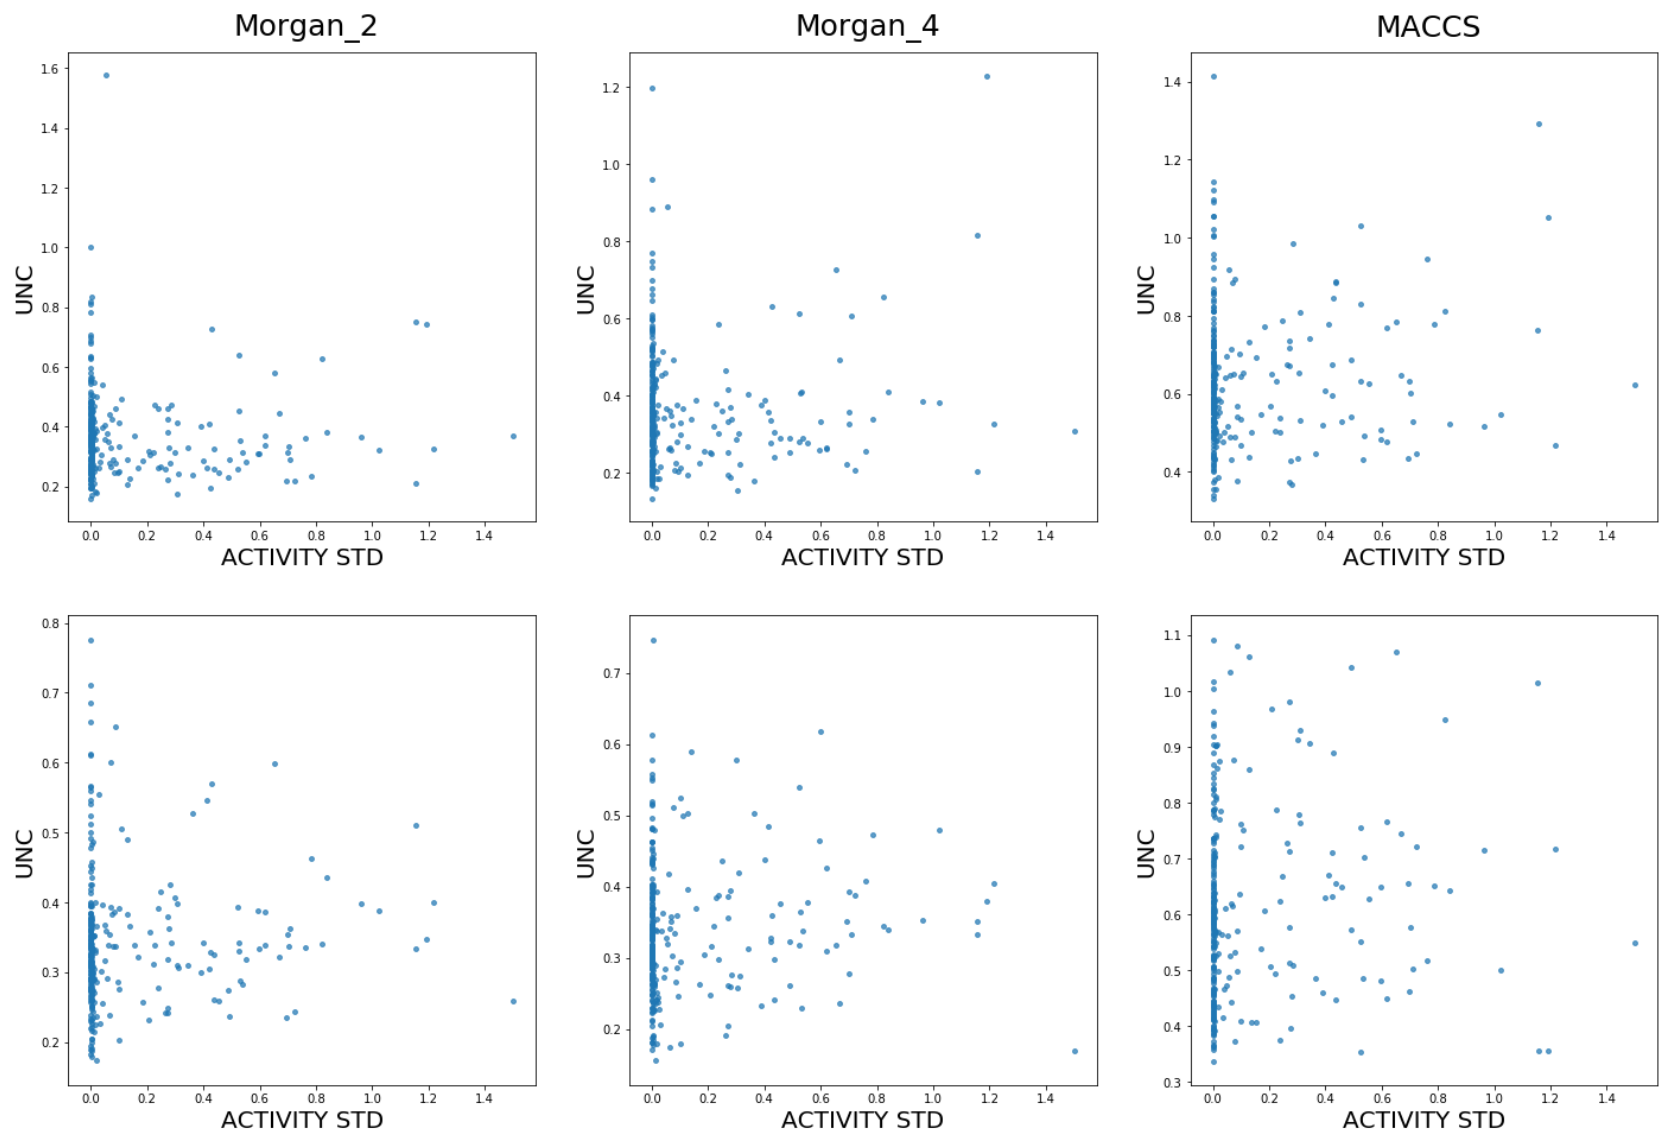

CV

BAC

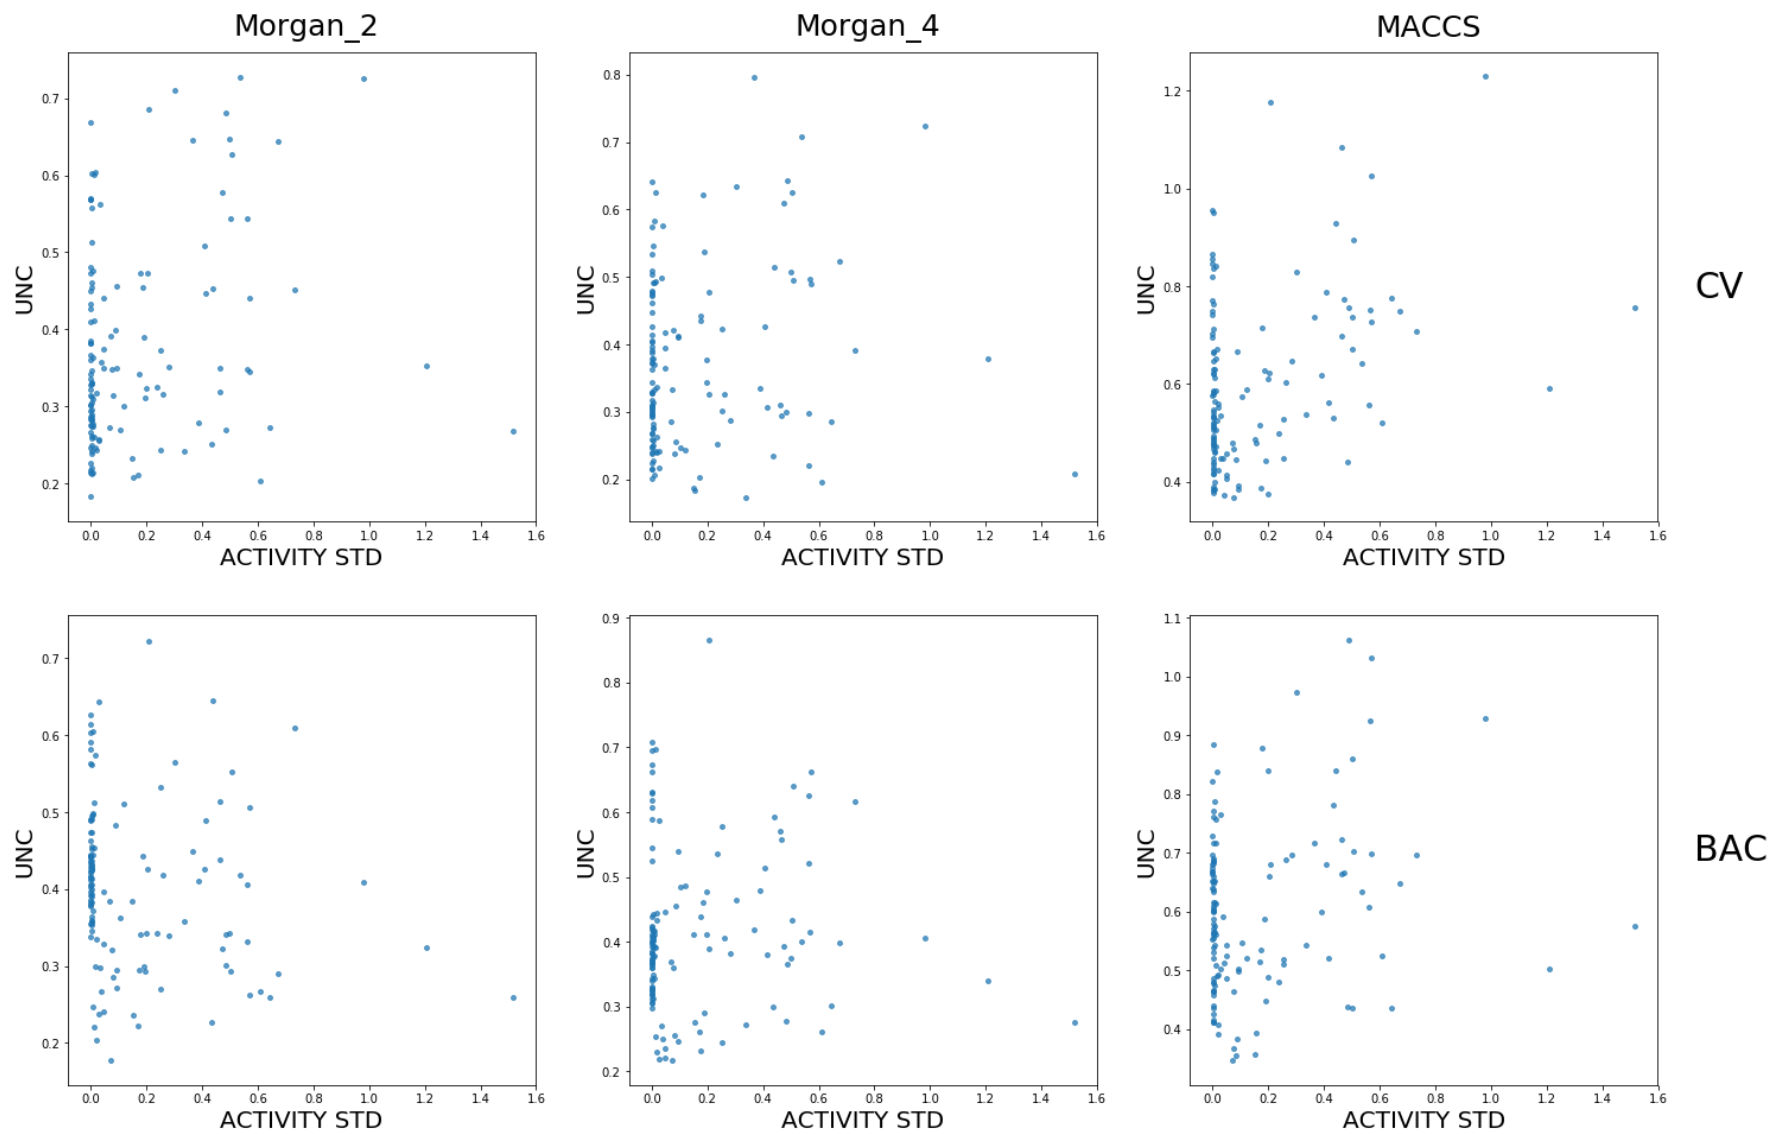

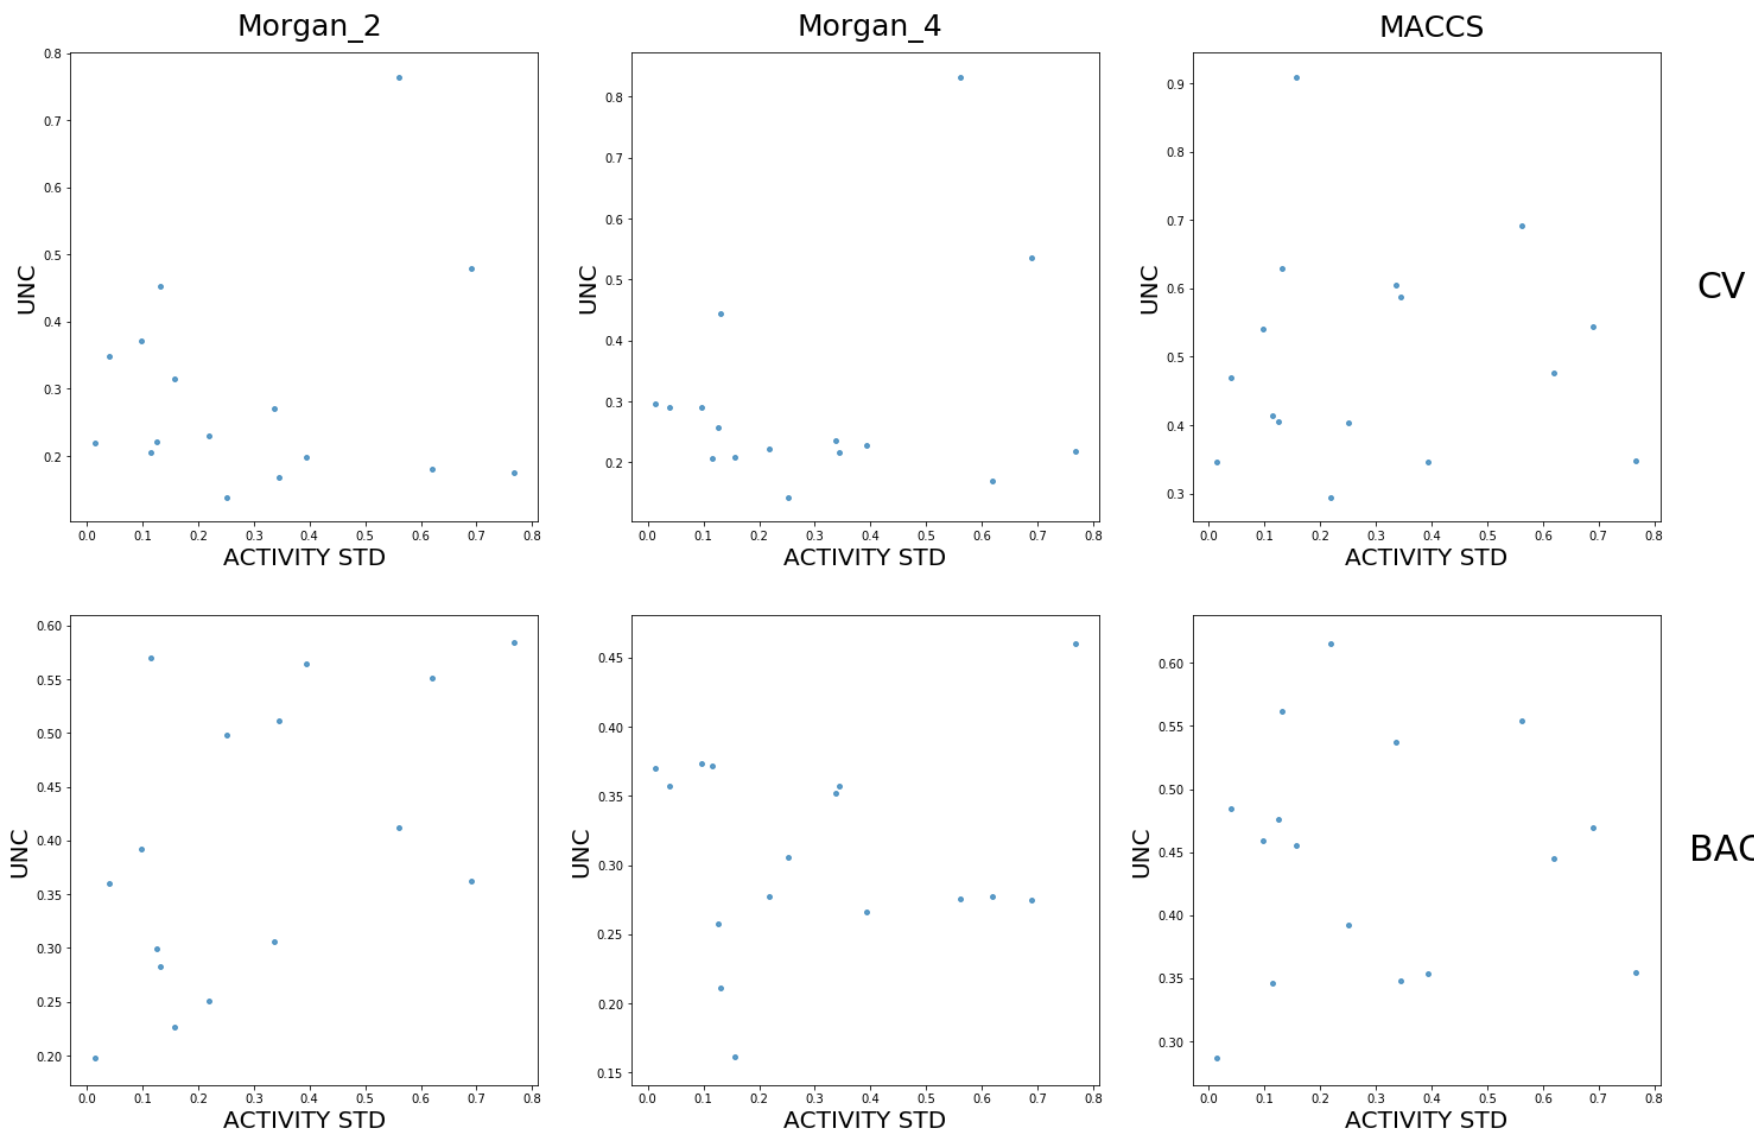

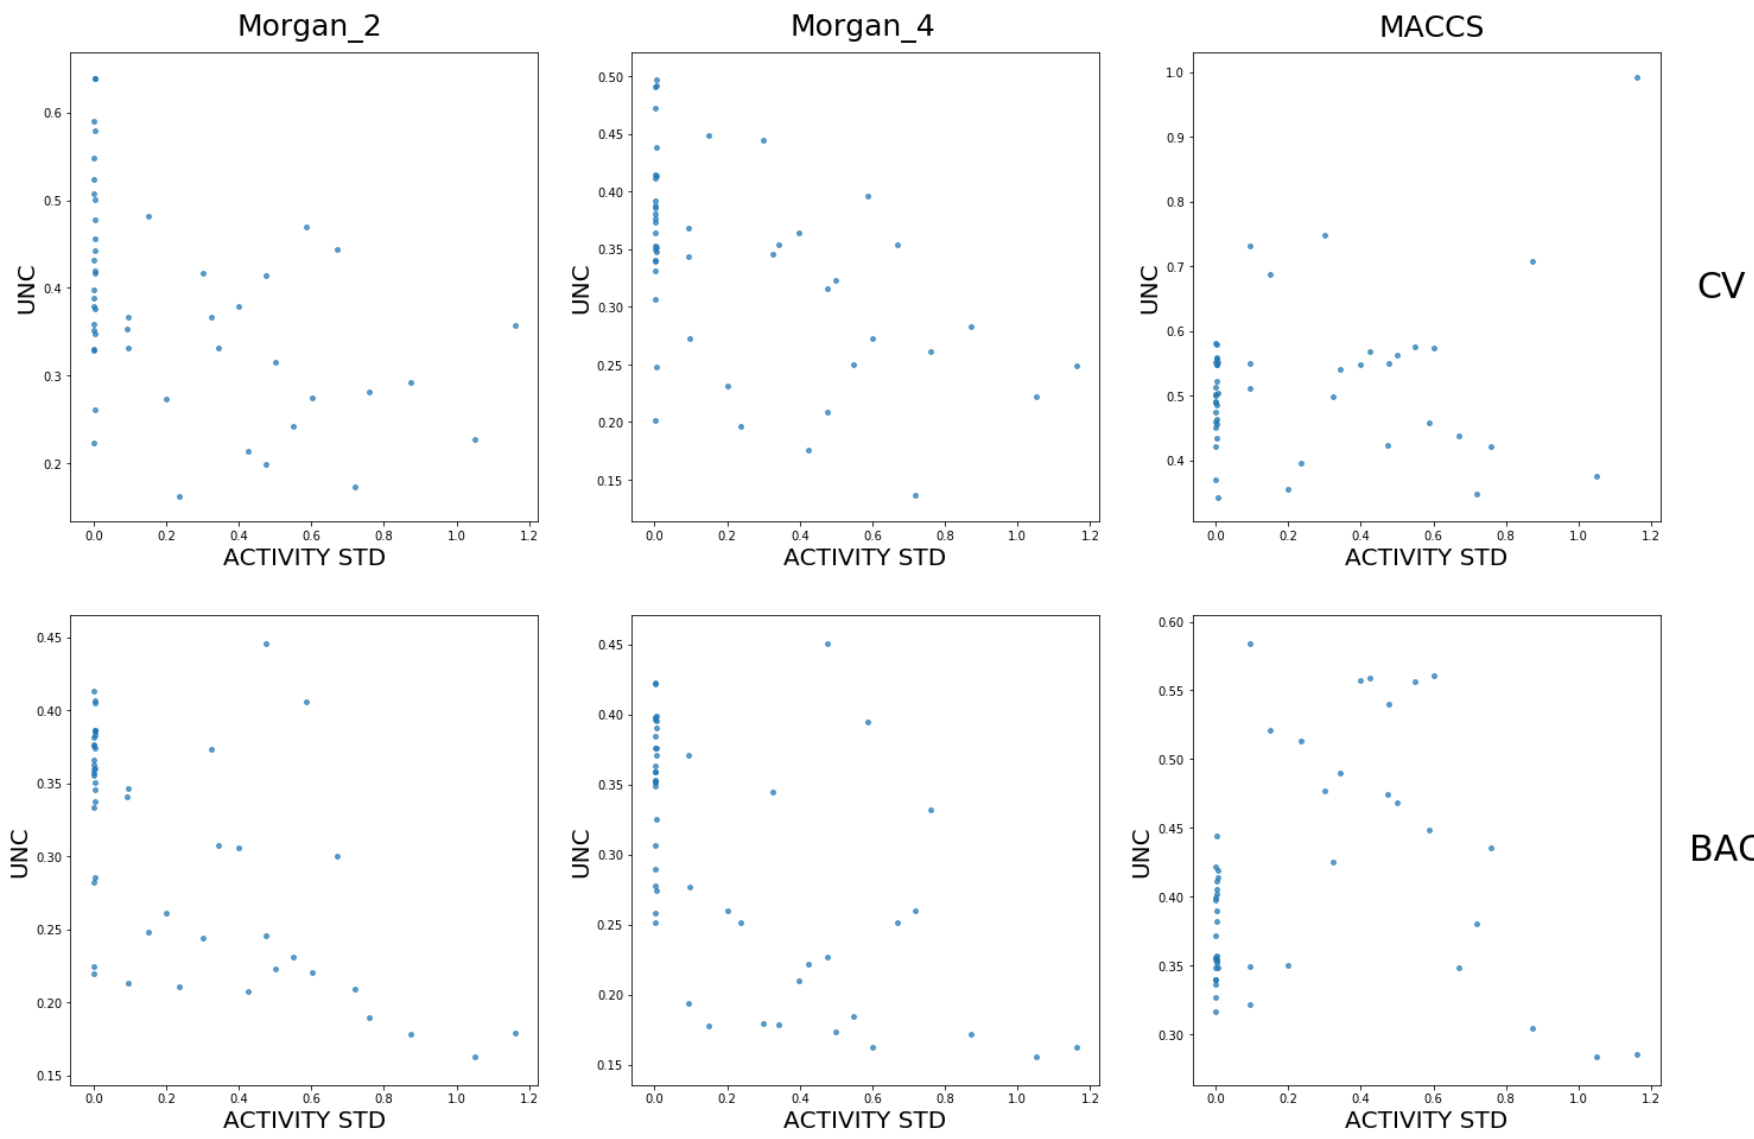

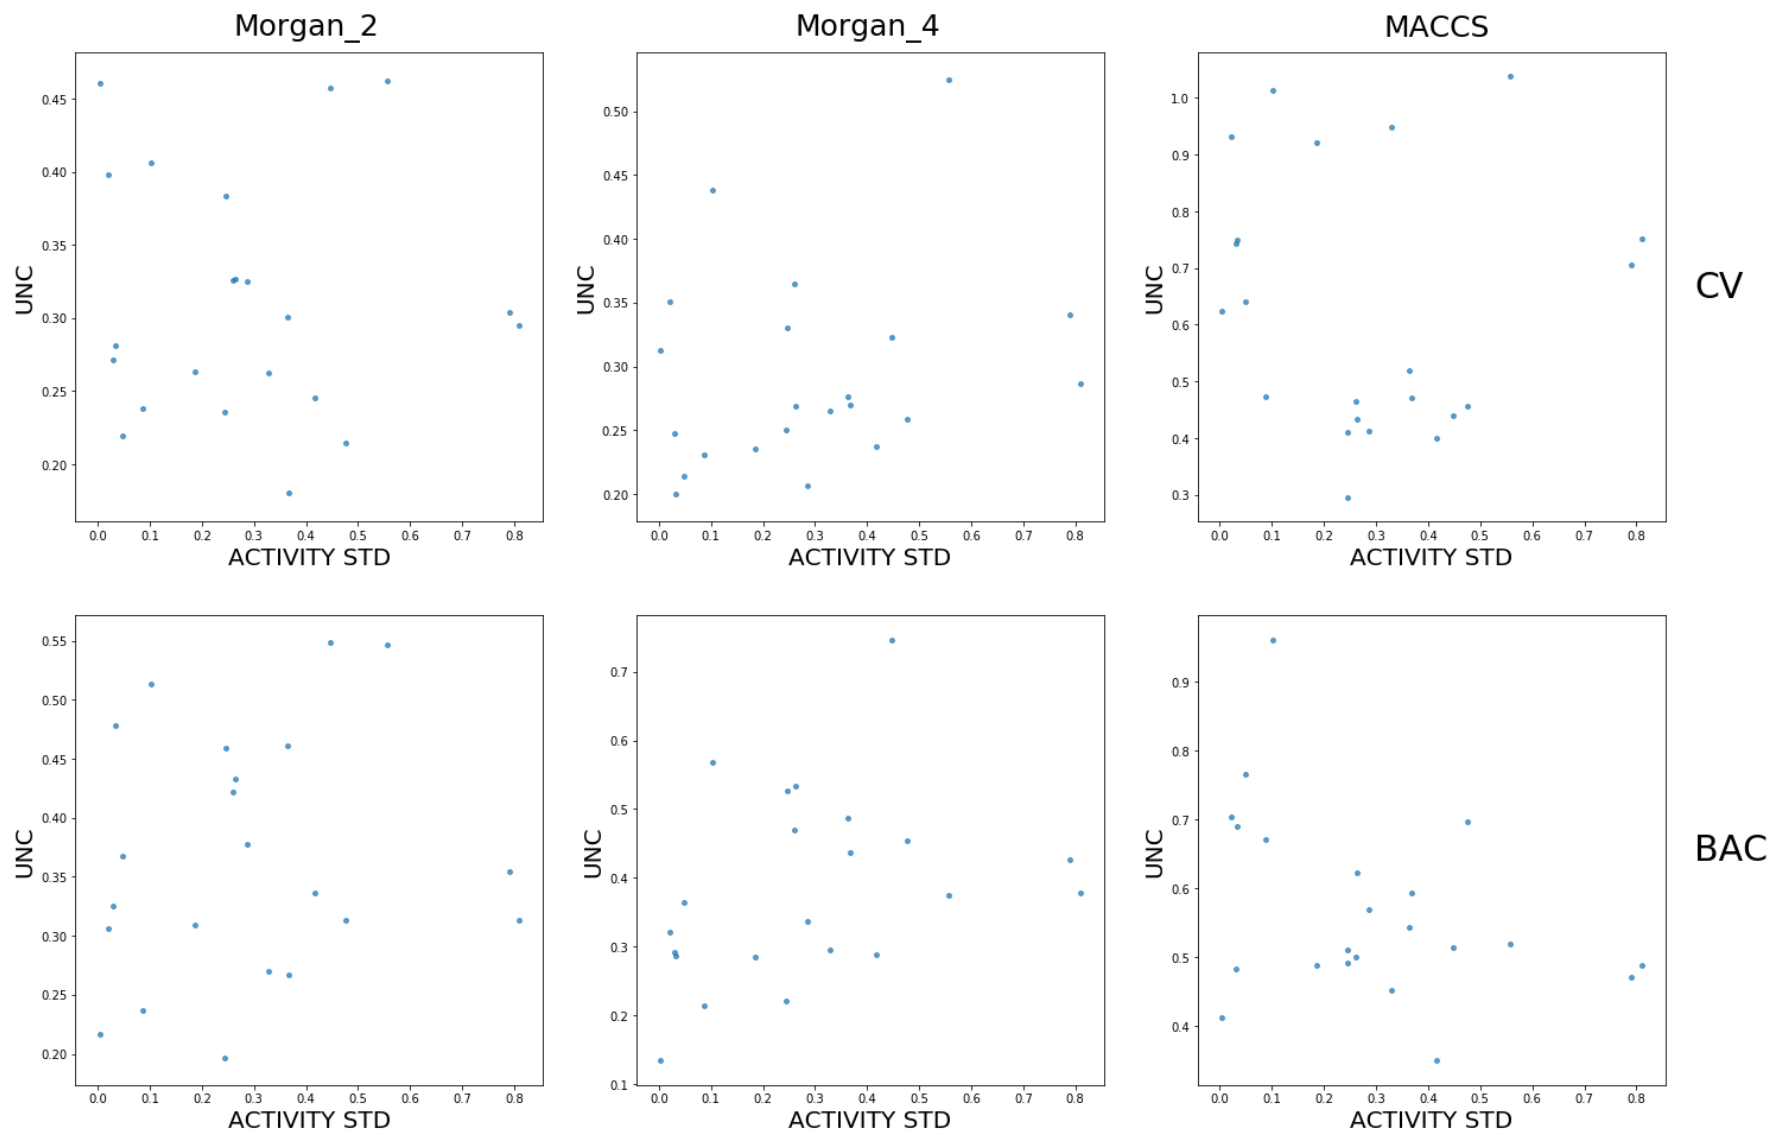

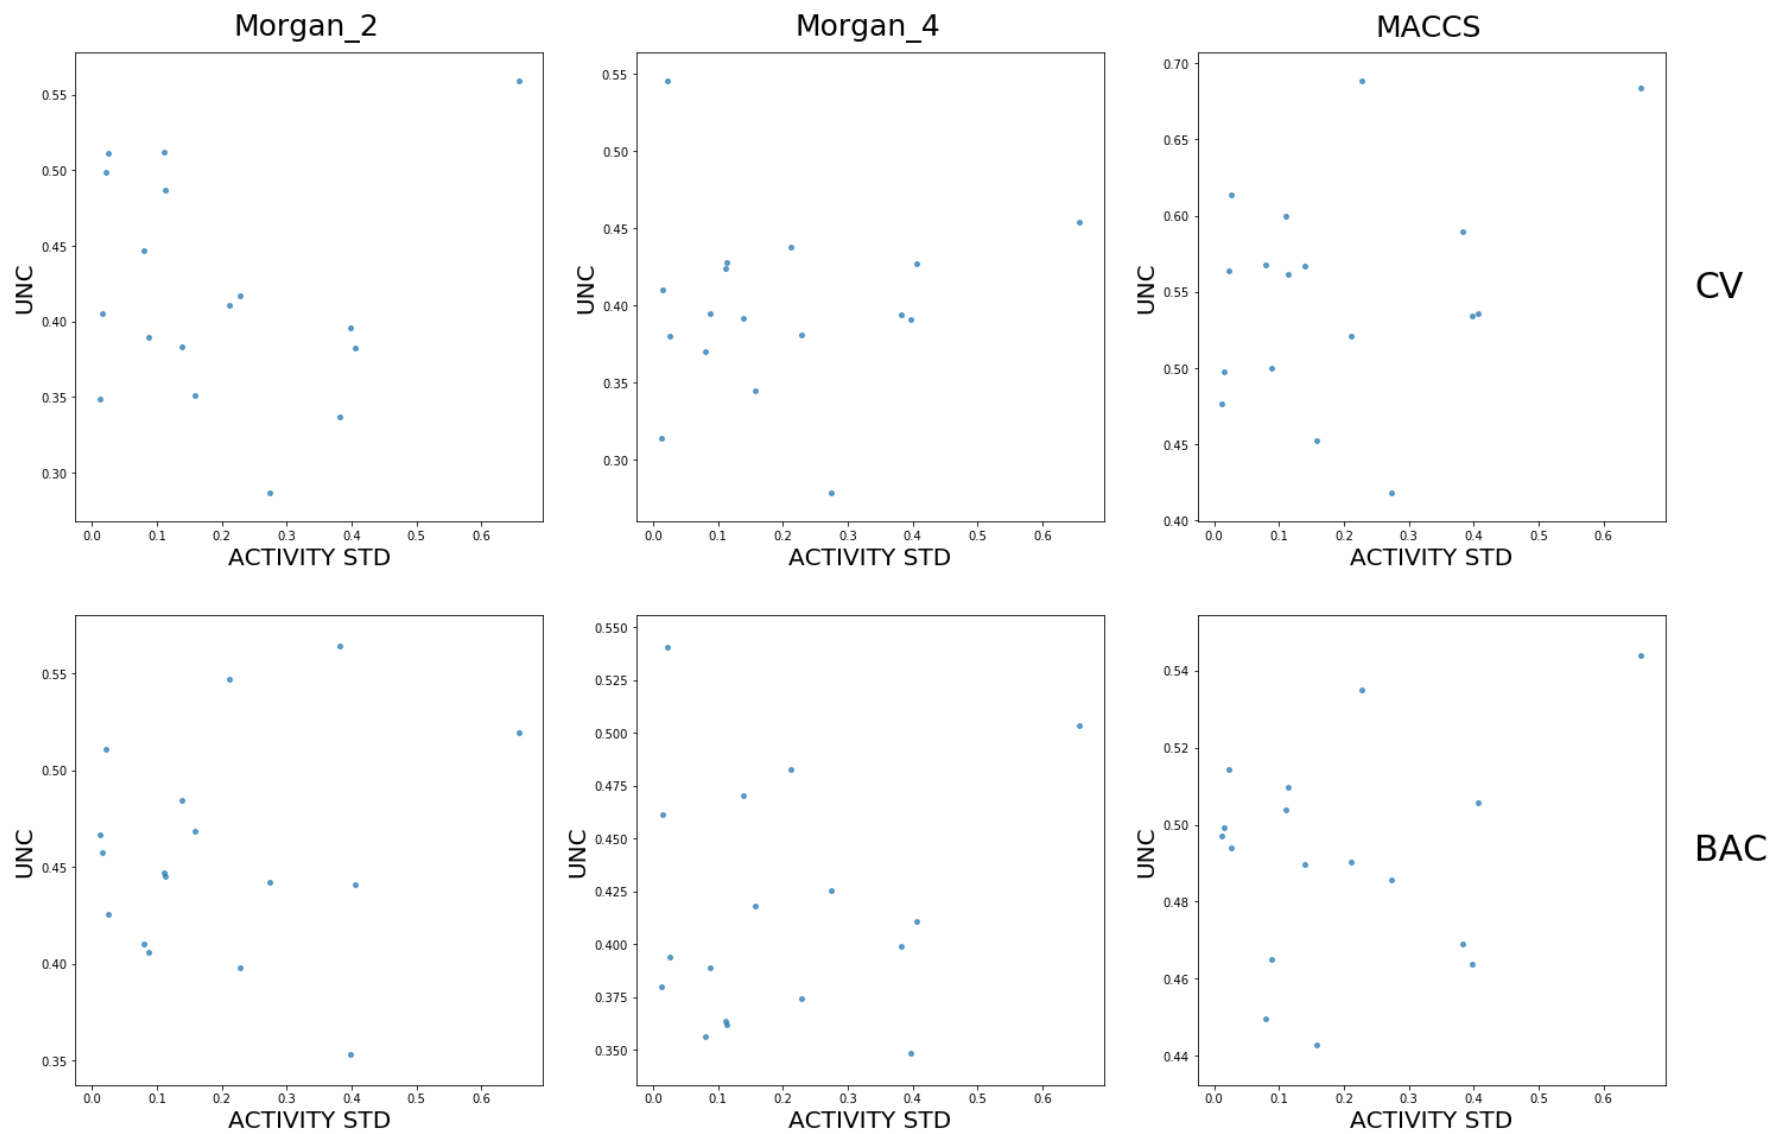

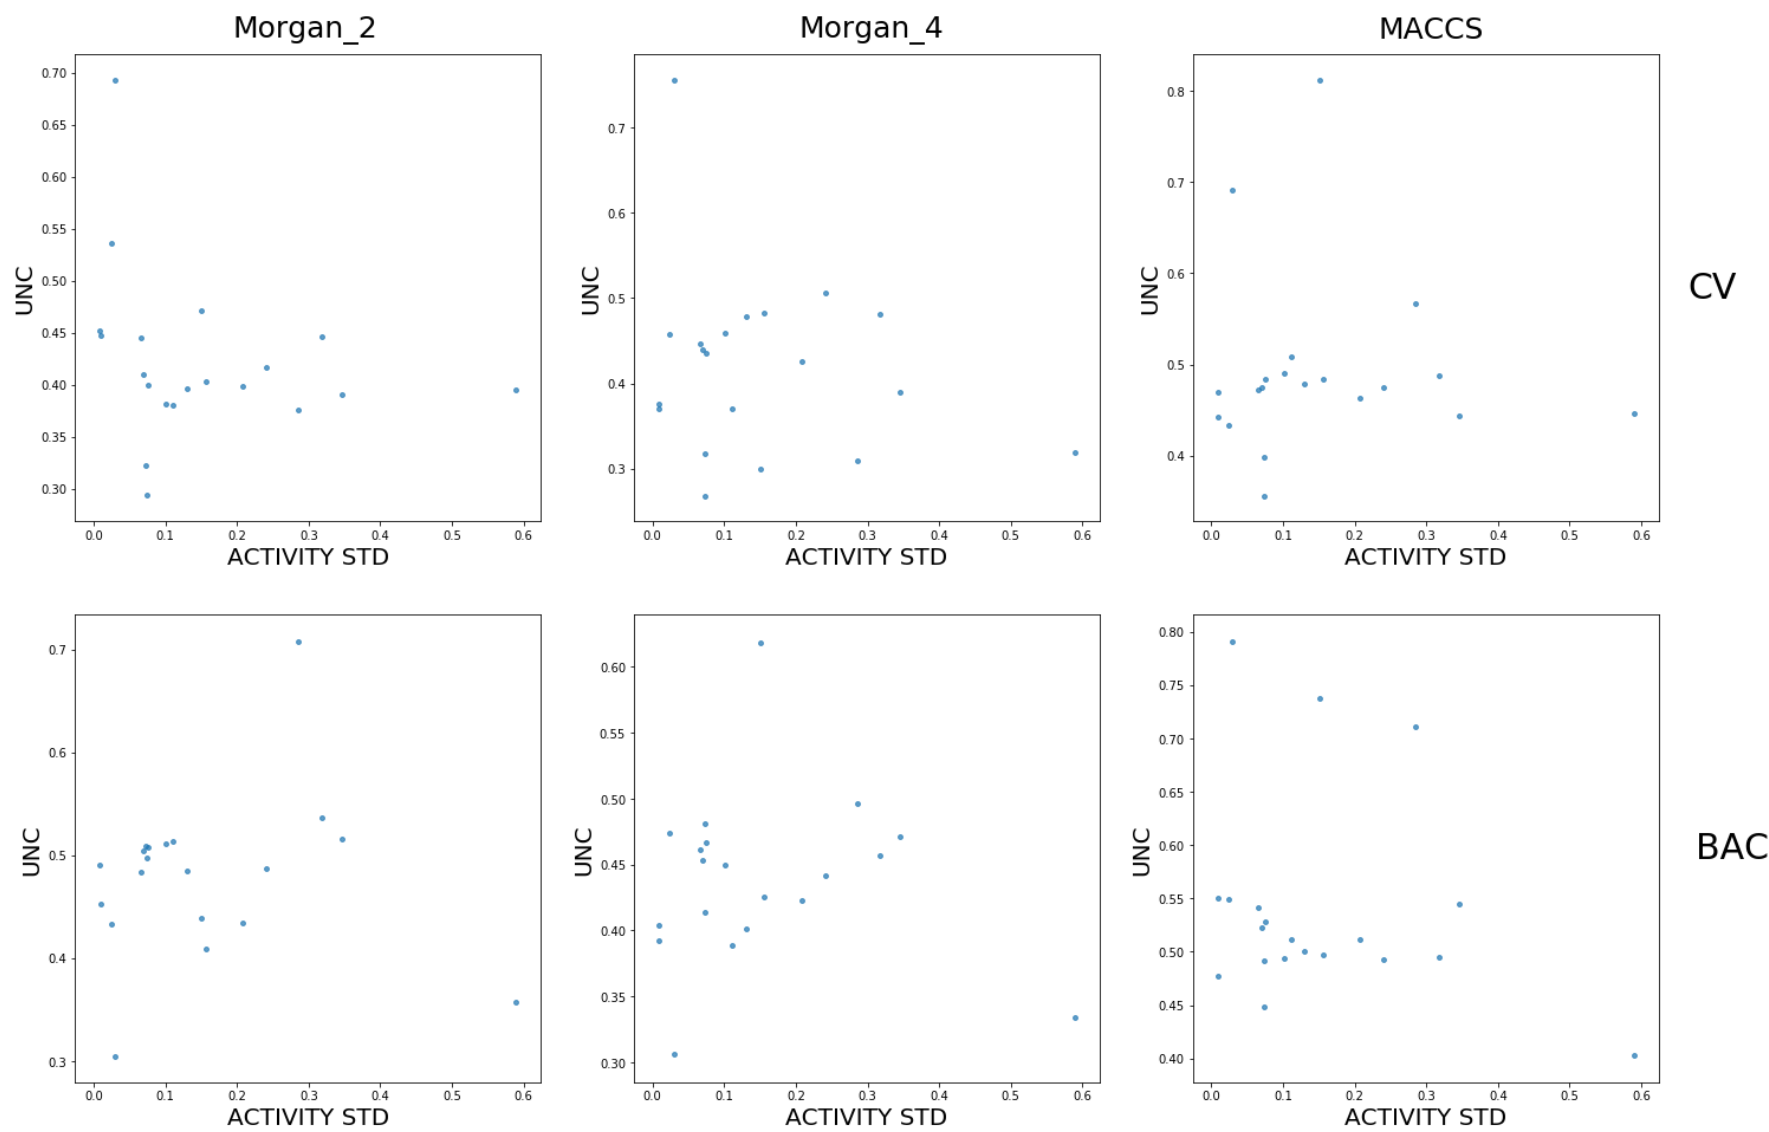

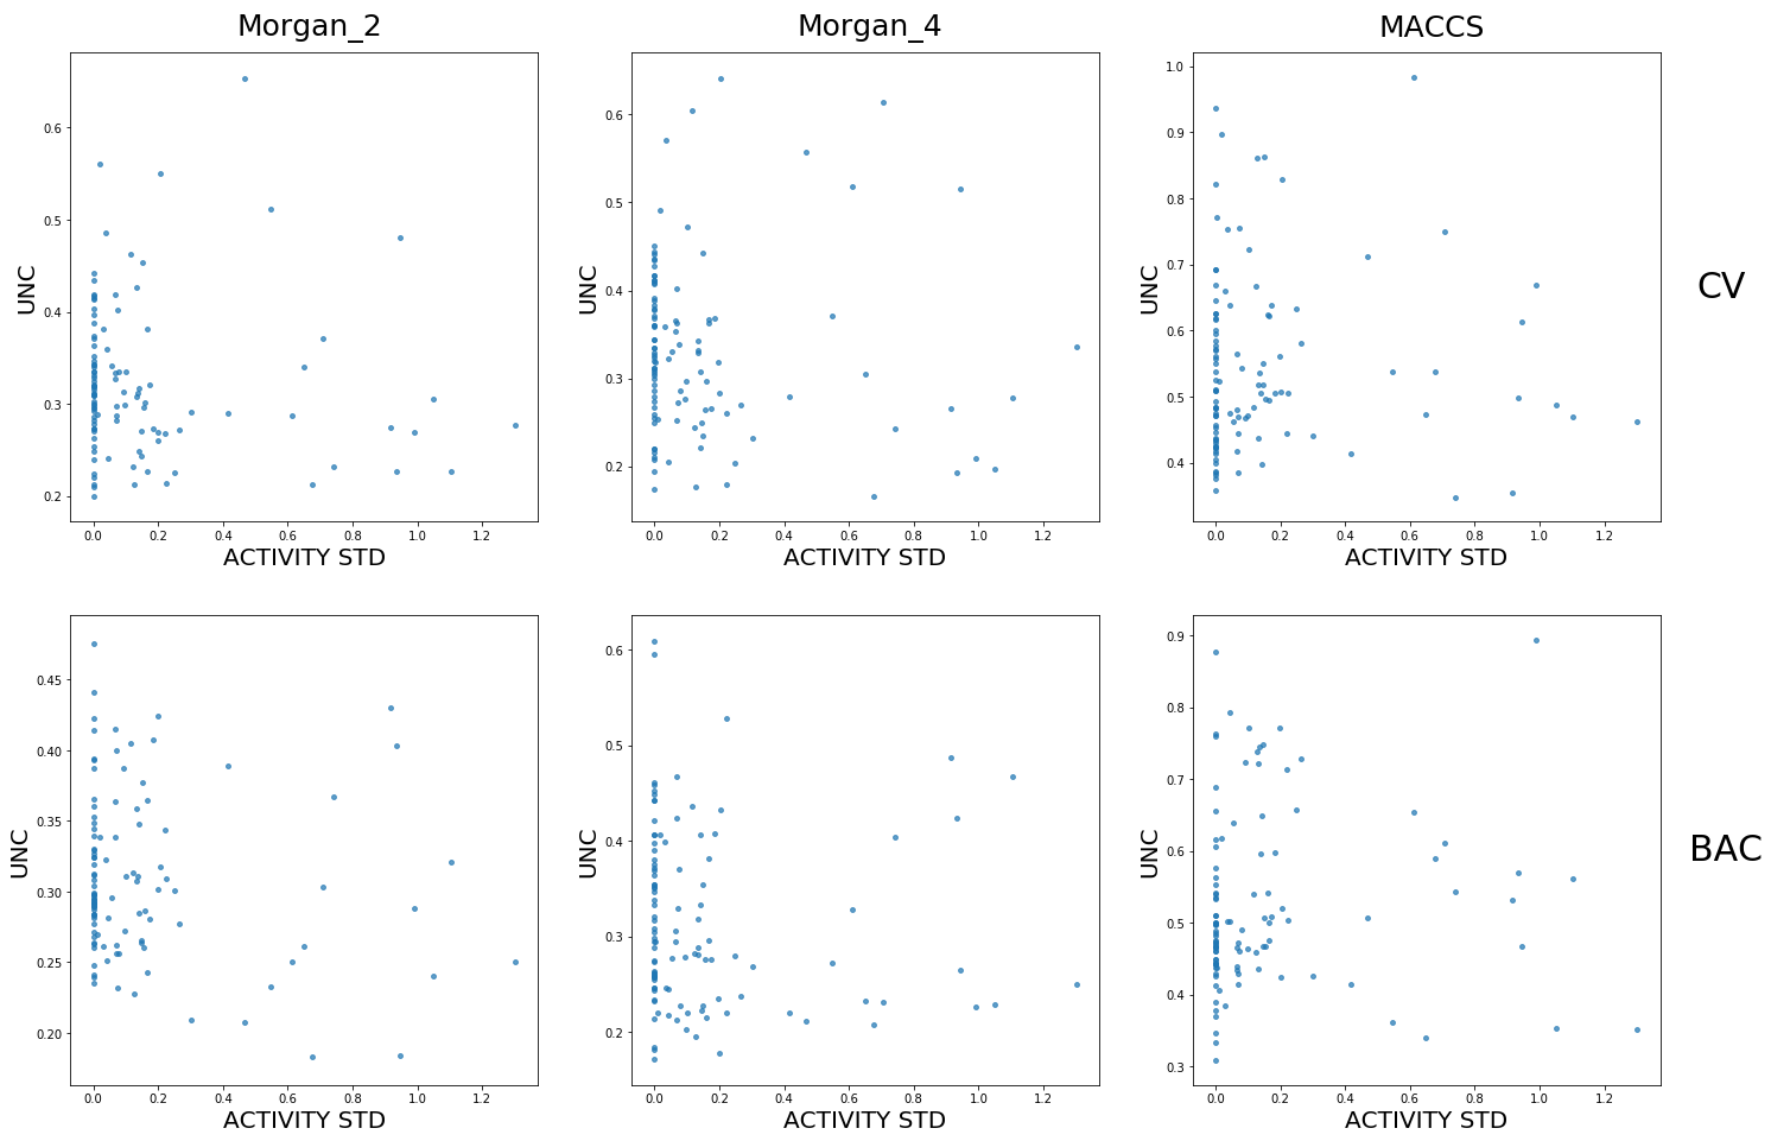



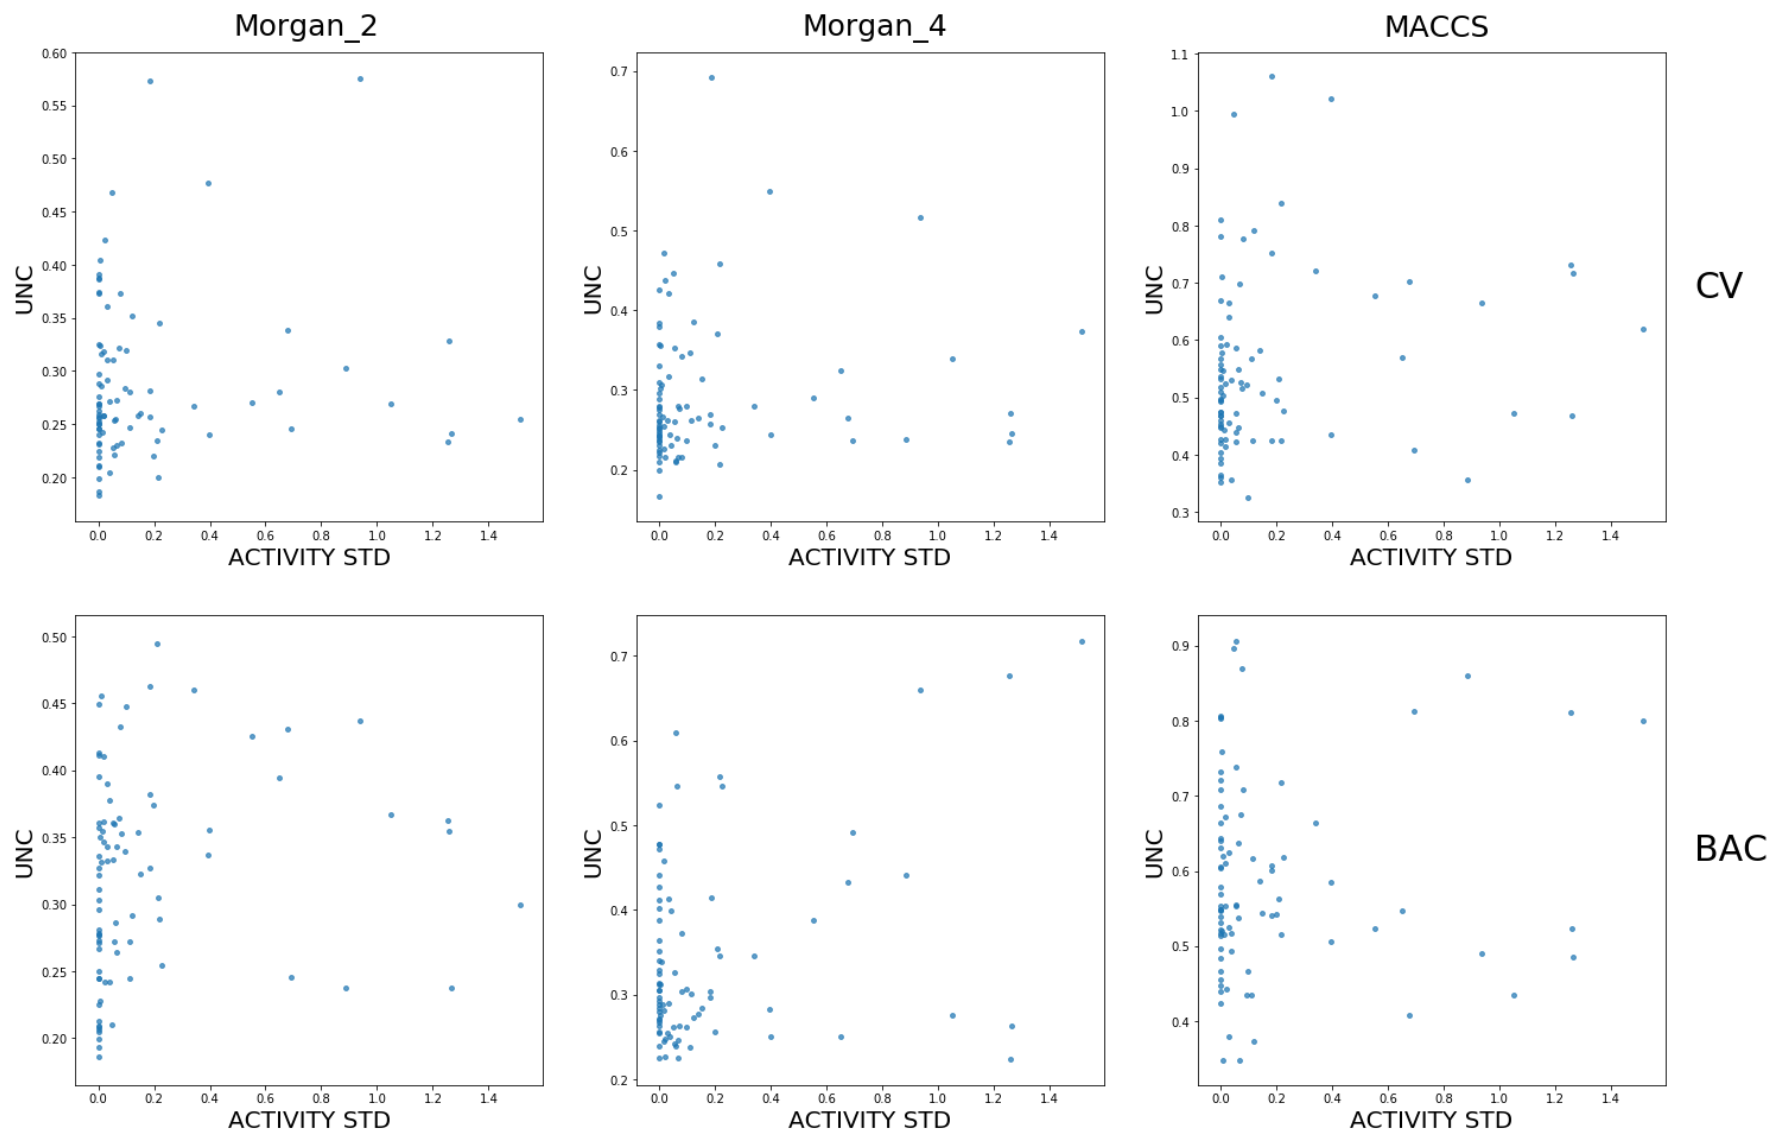

Supplement: s1 [file s1]

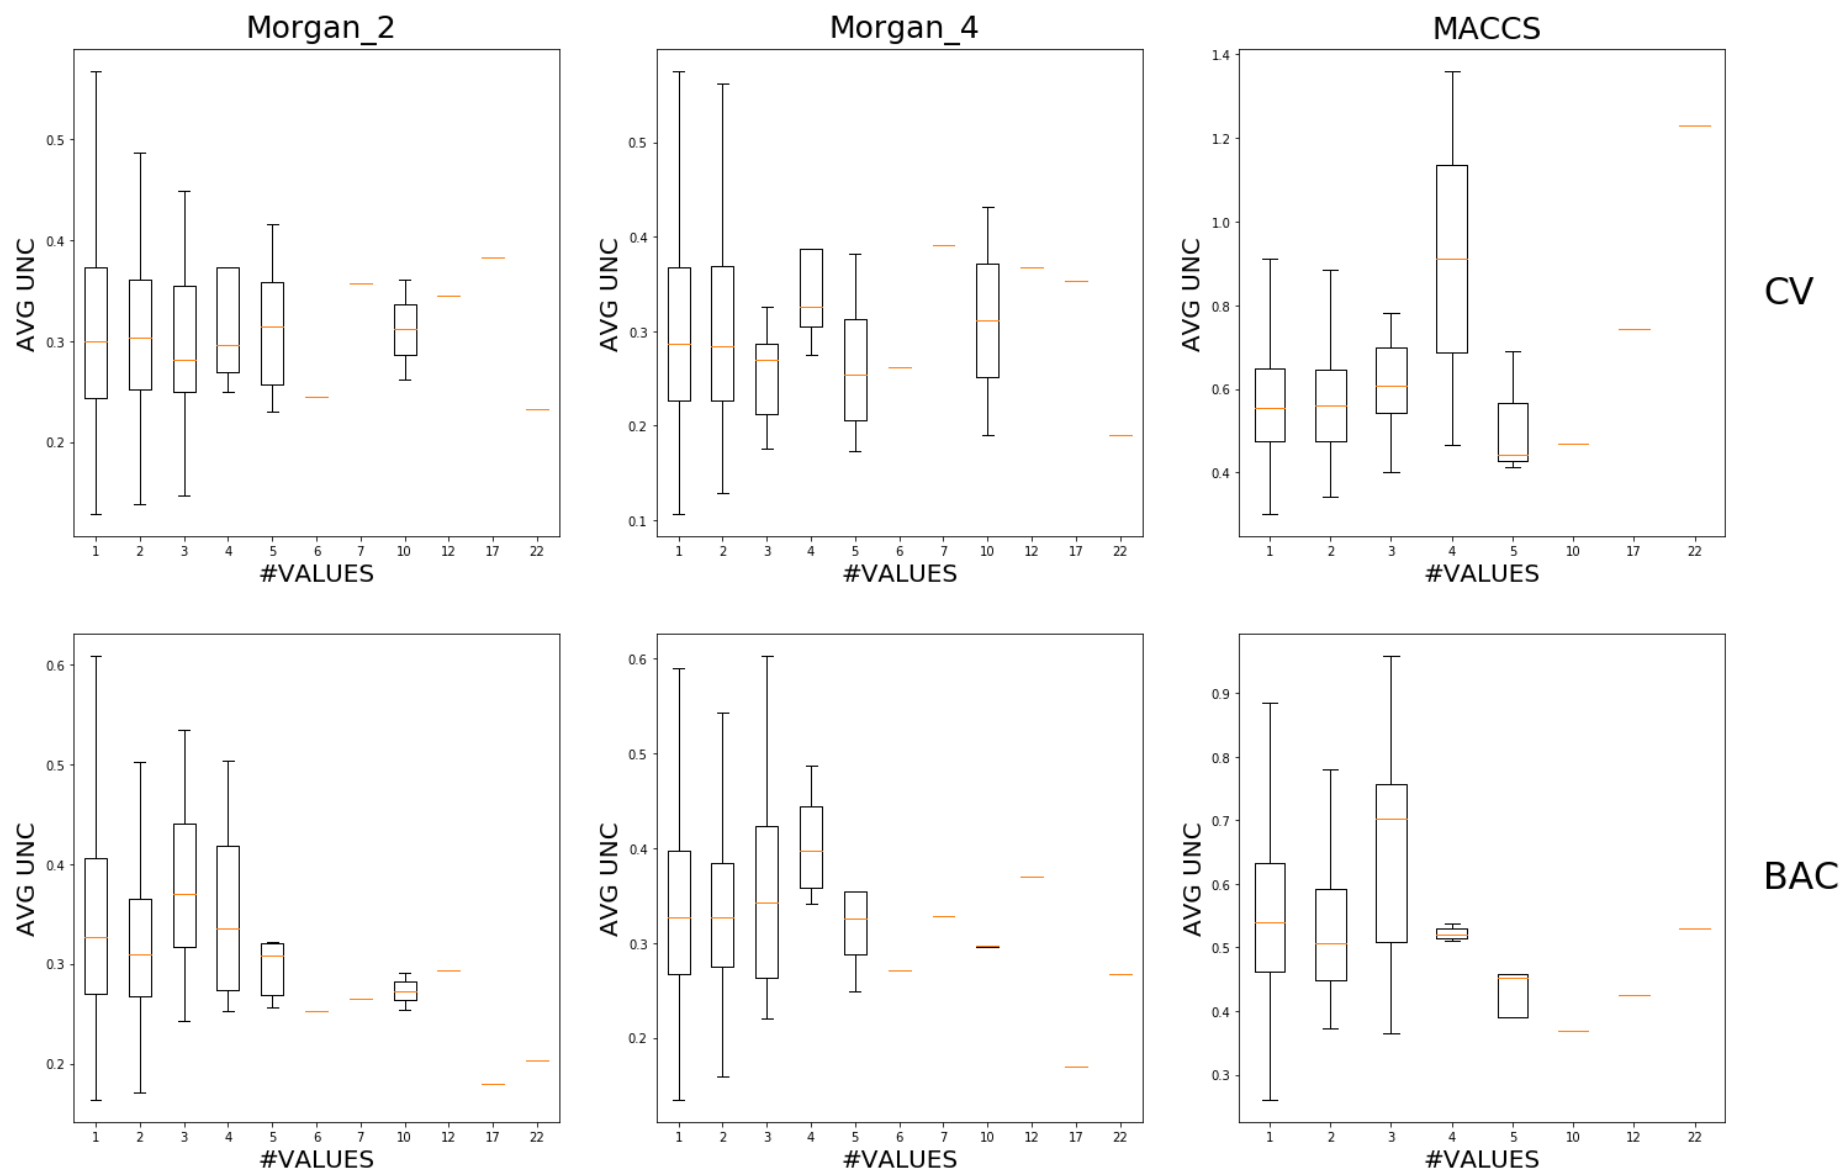

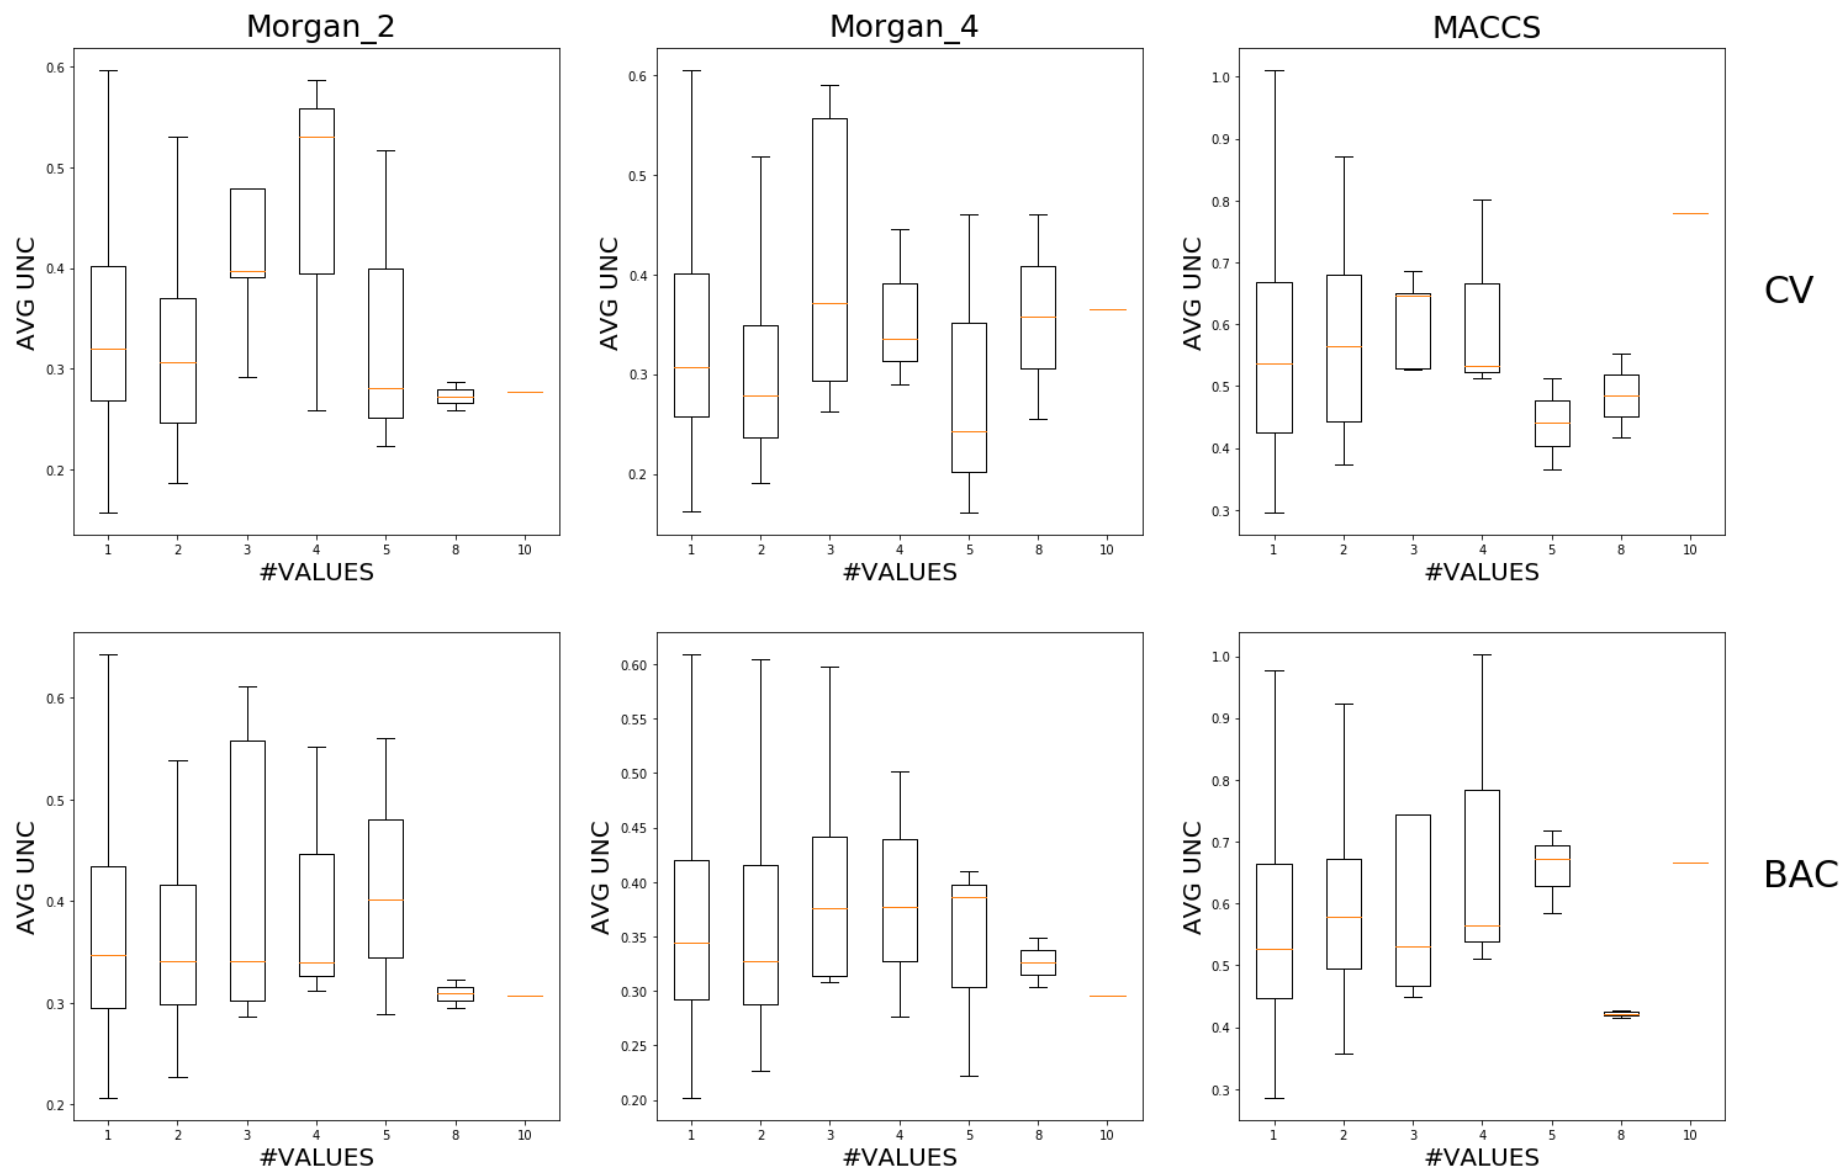

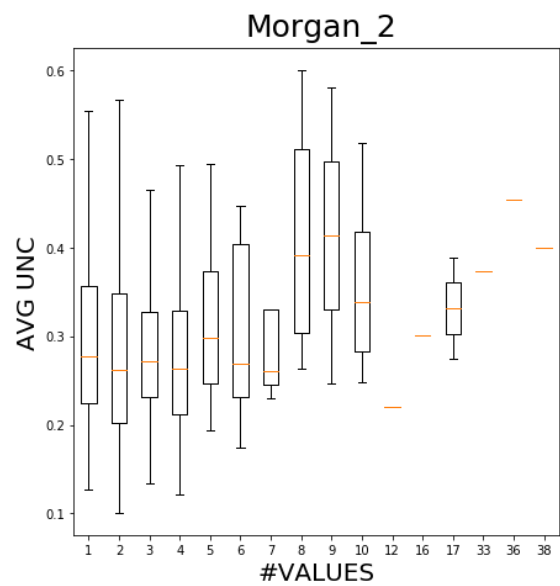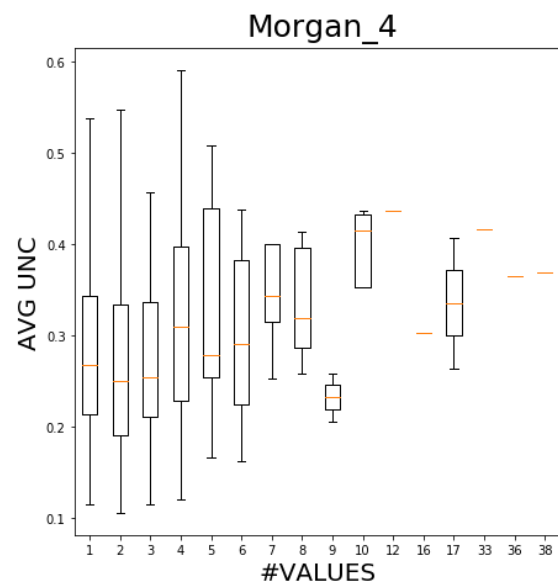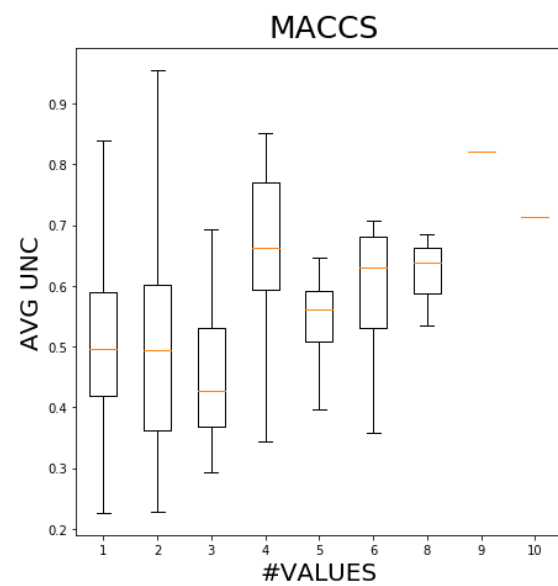

CV

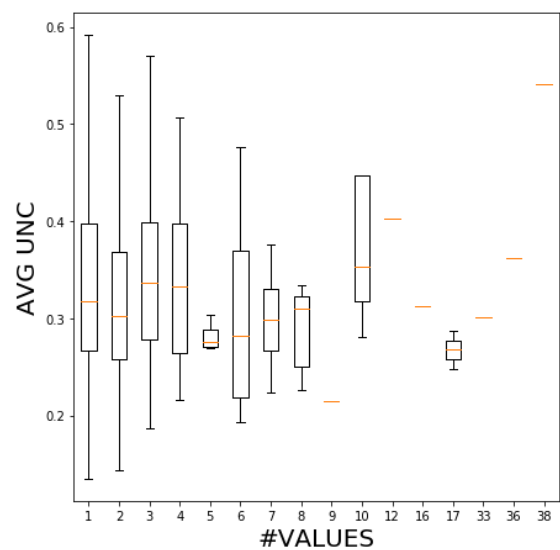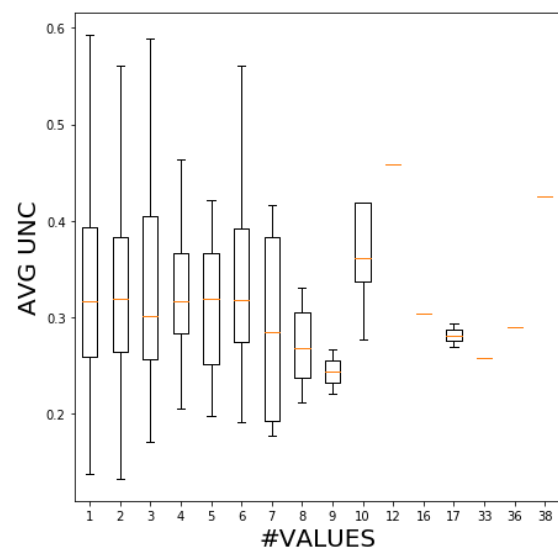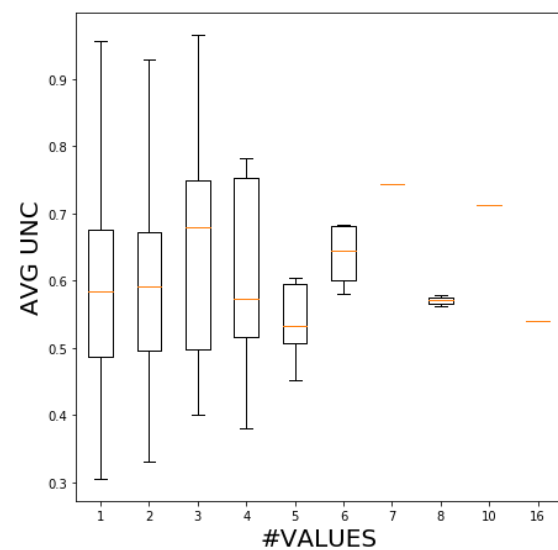

BAC

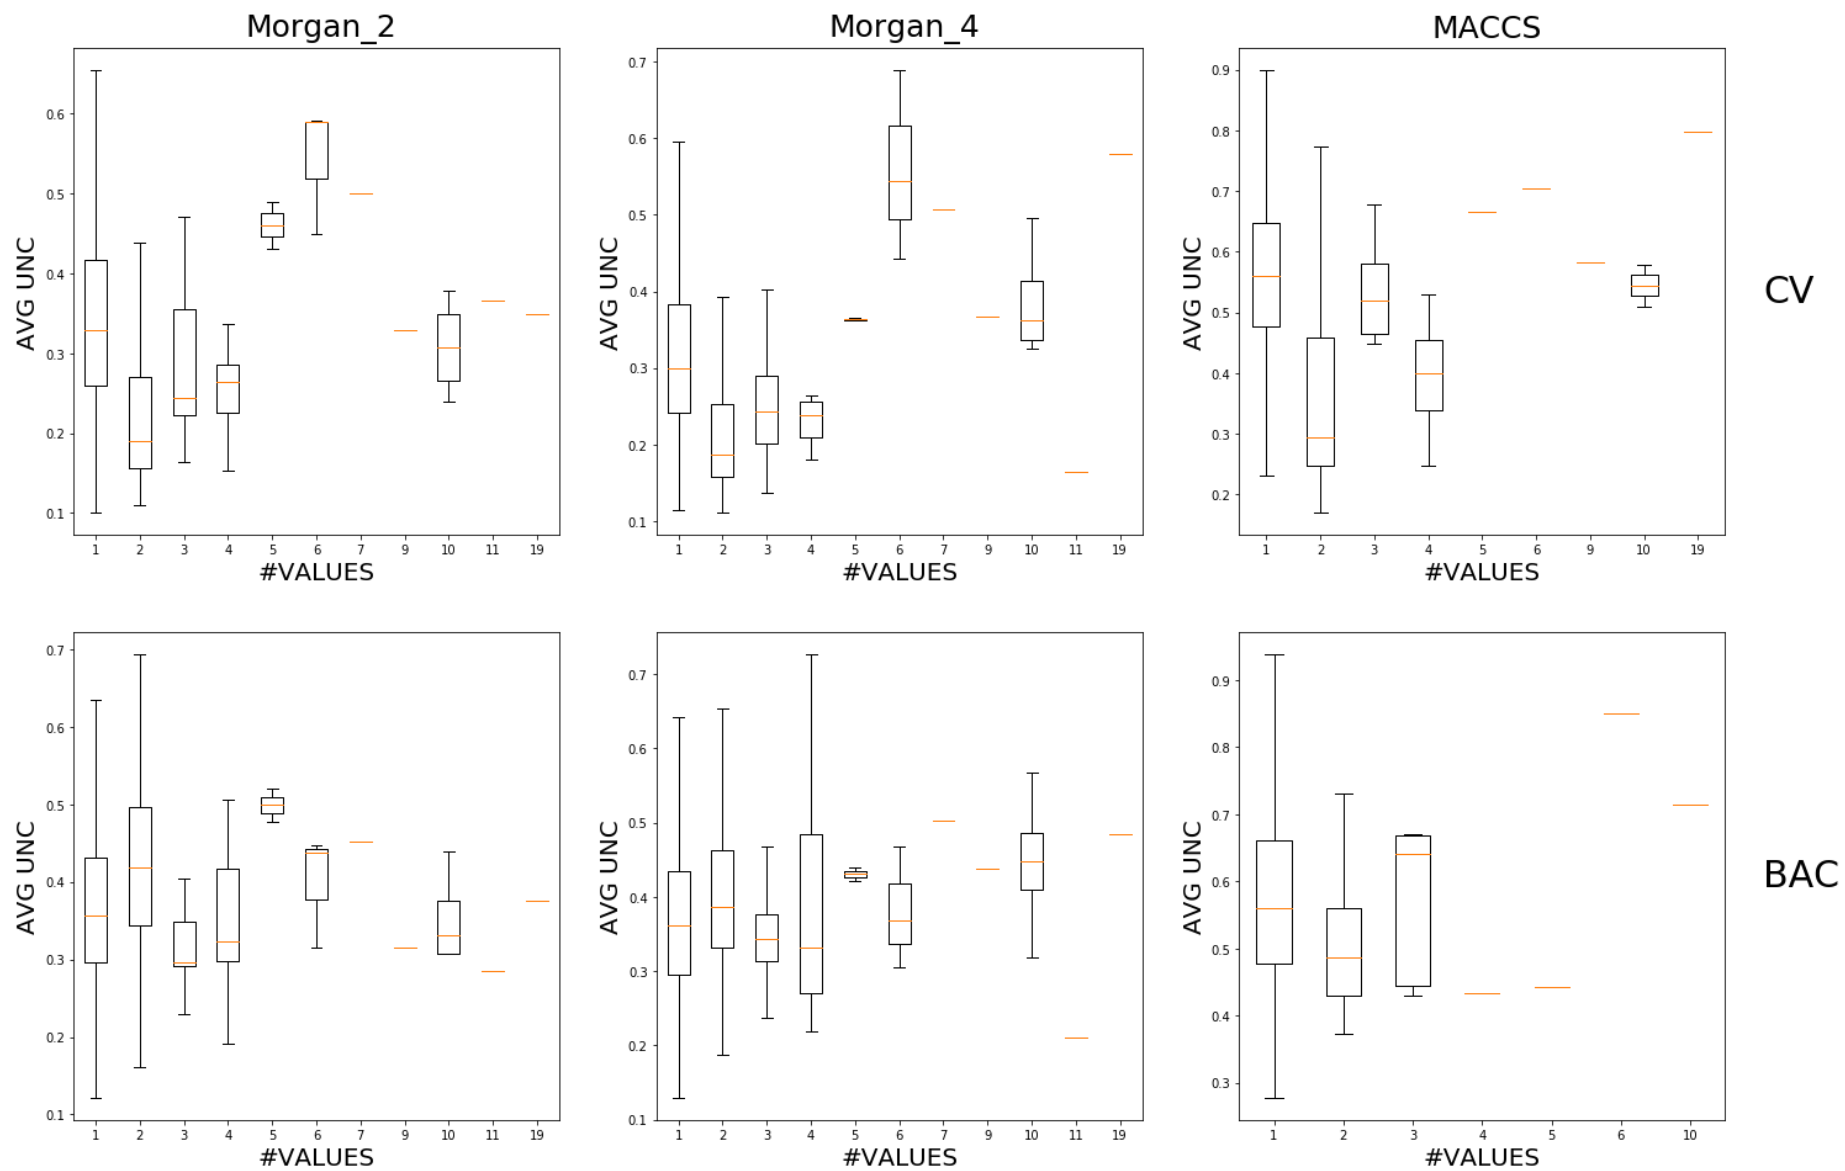

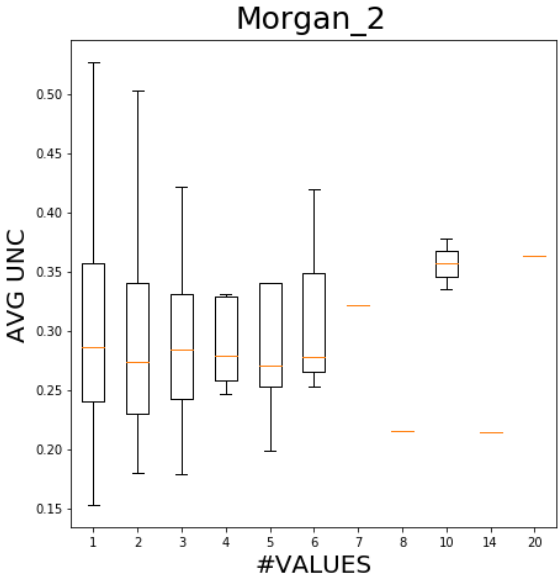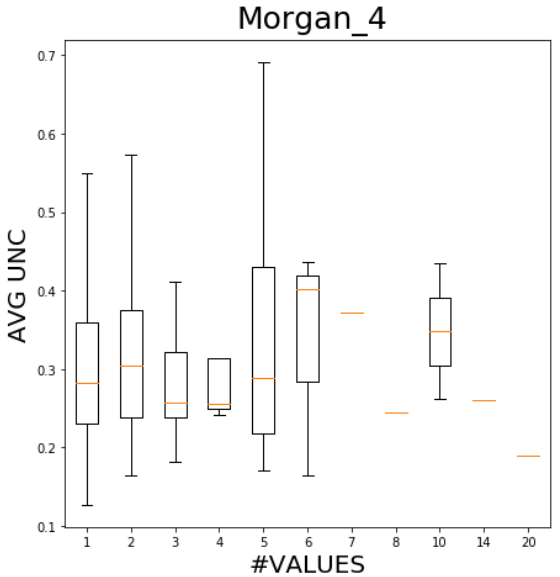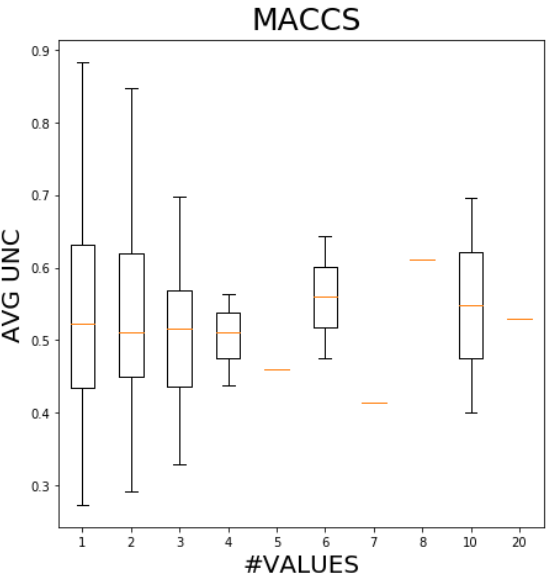

CV

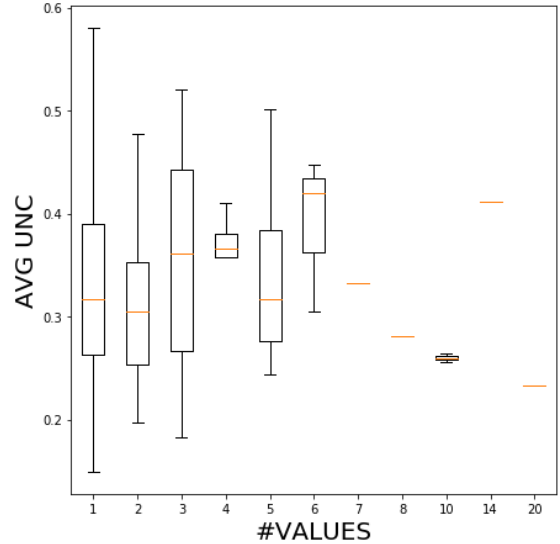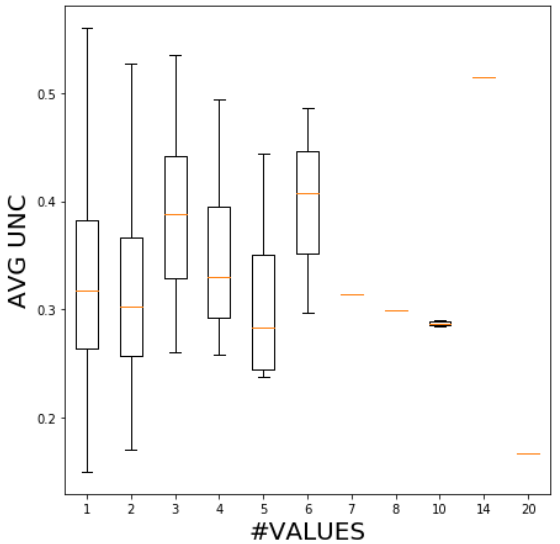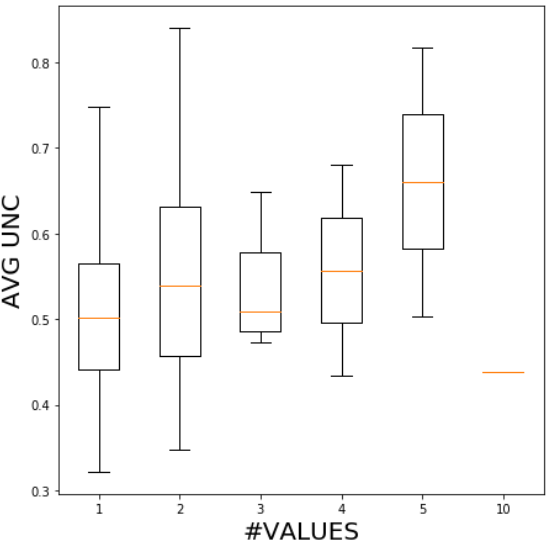

BAC

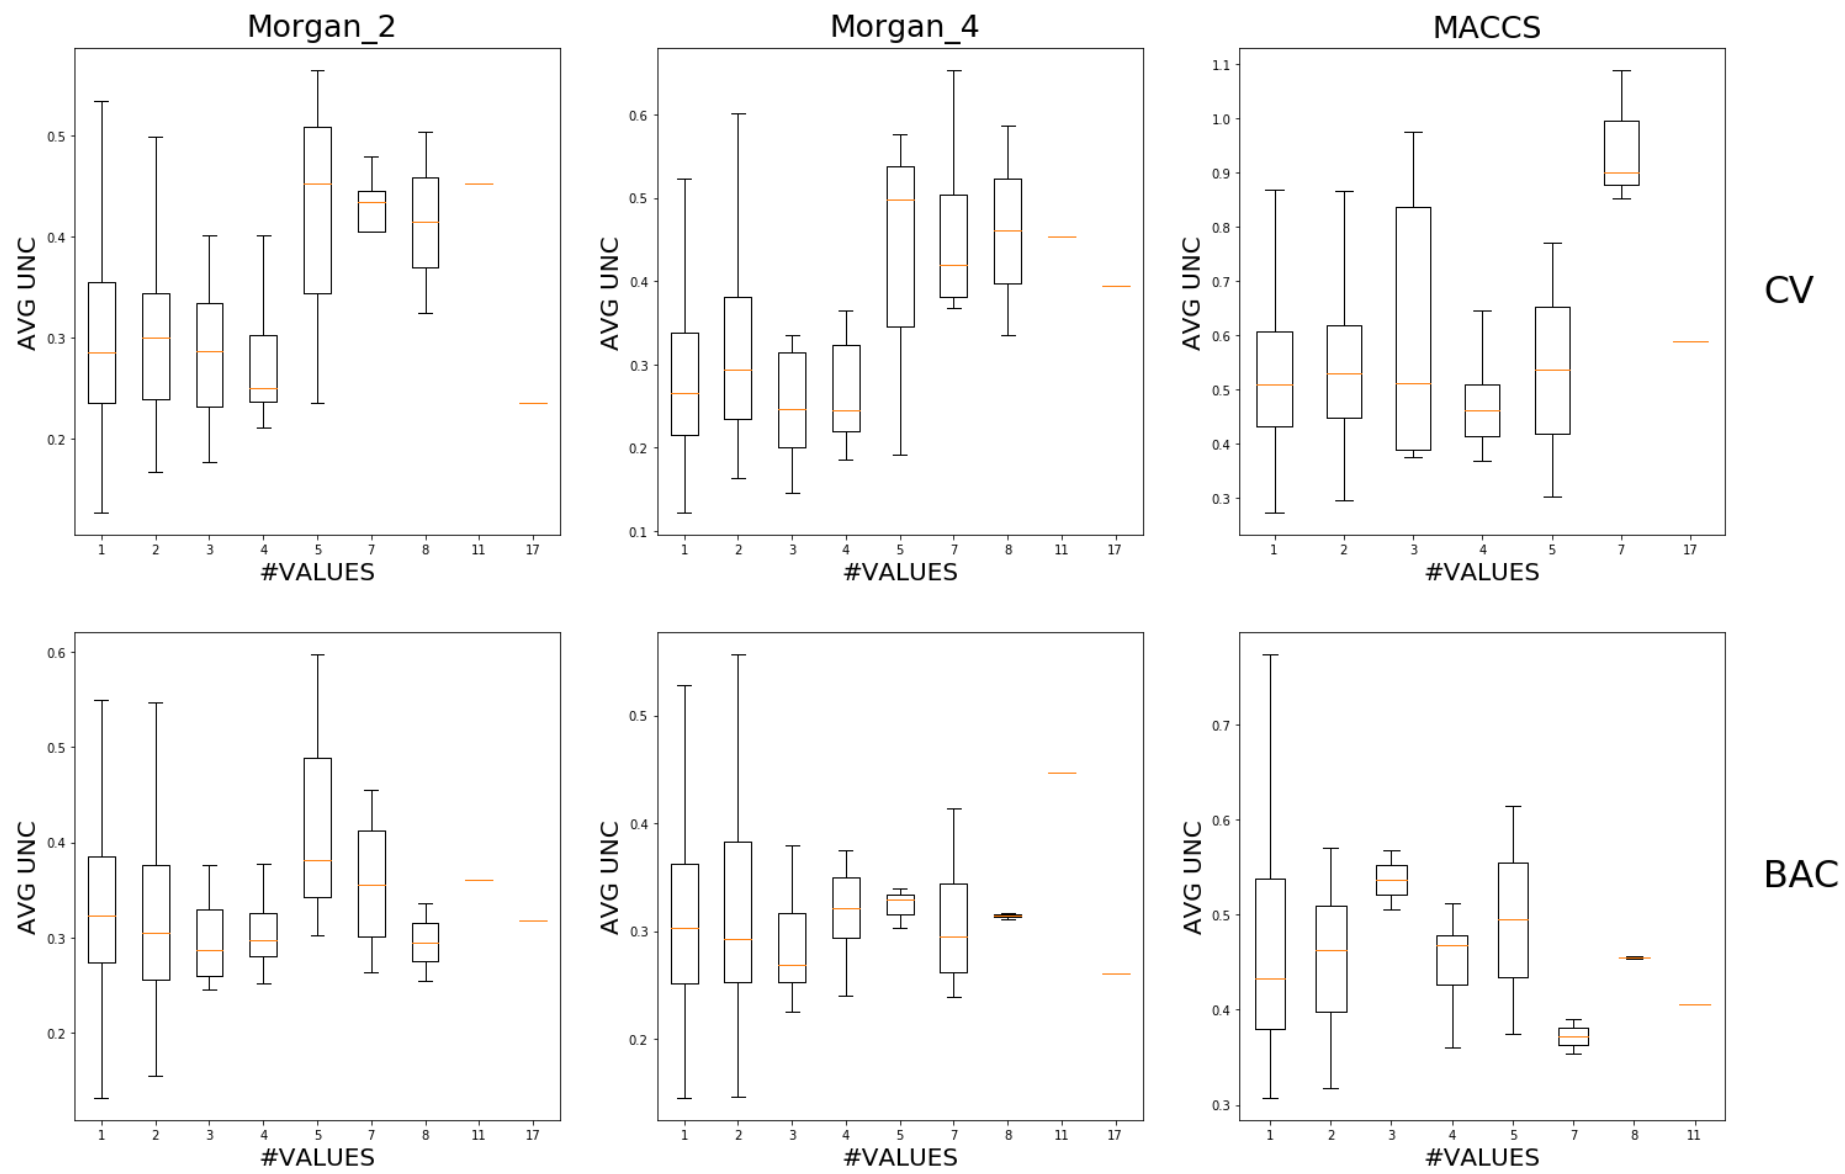

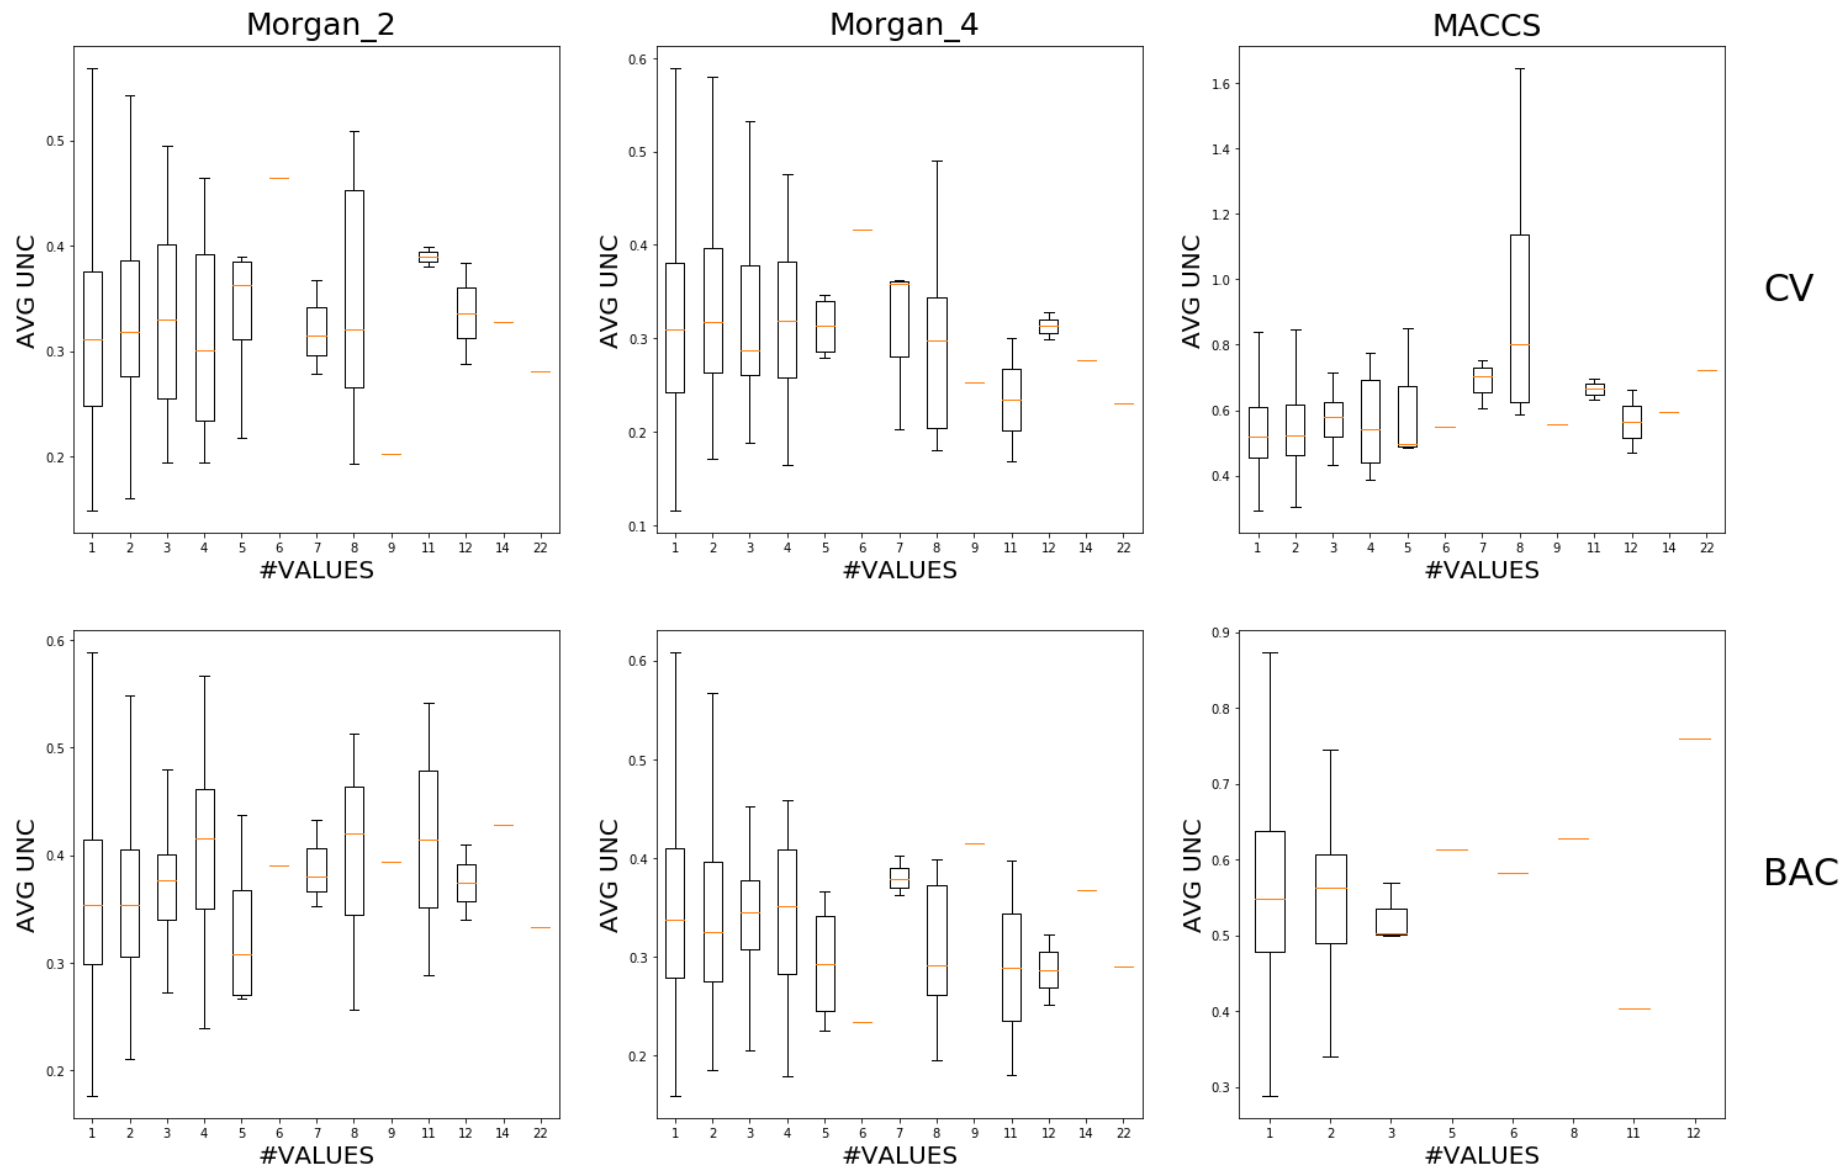

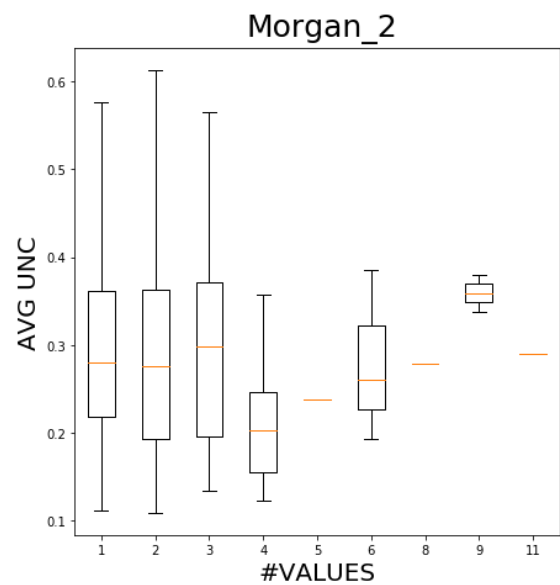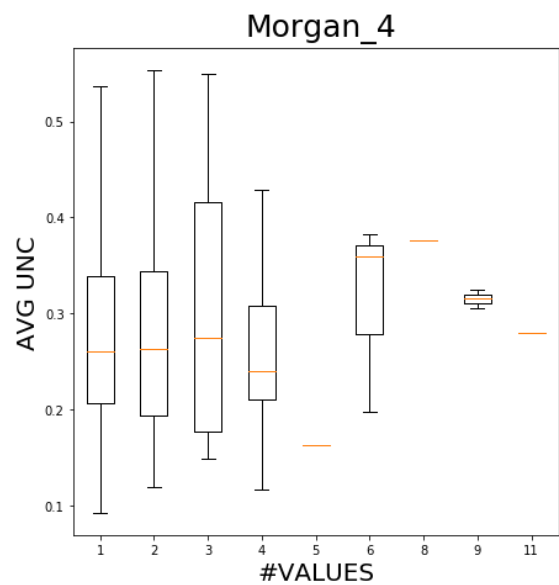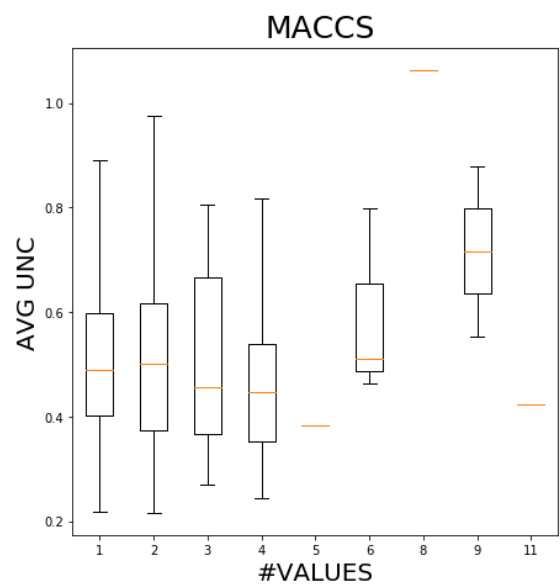

CV

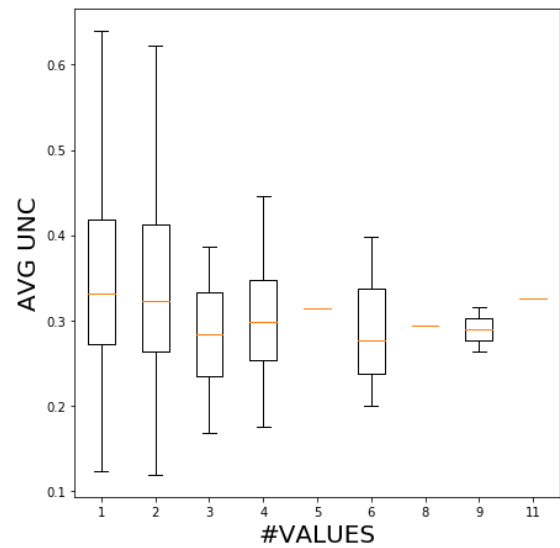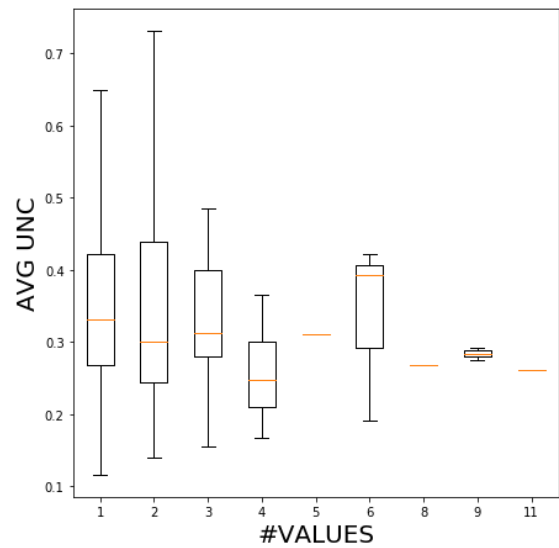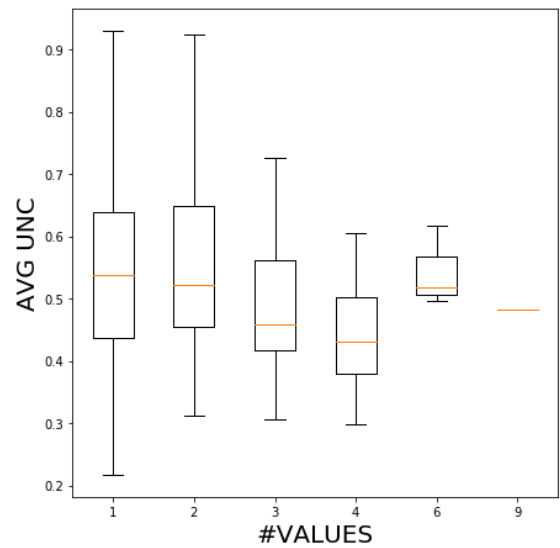

BAC



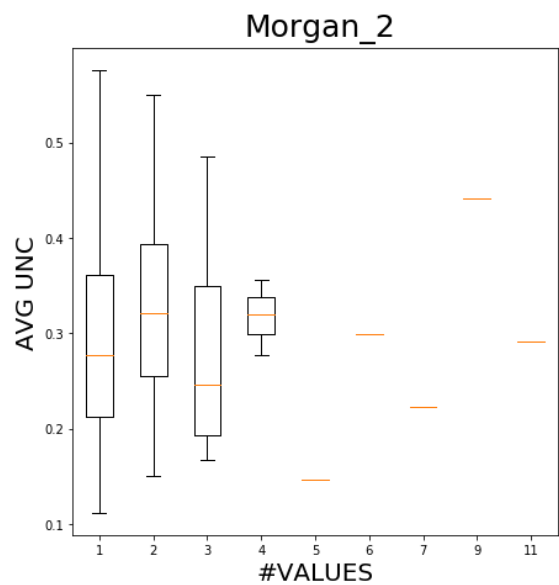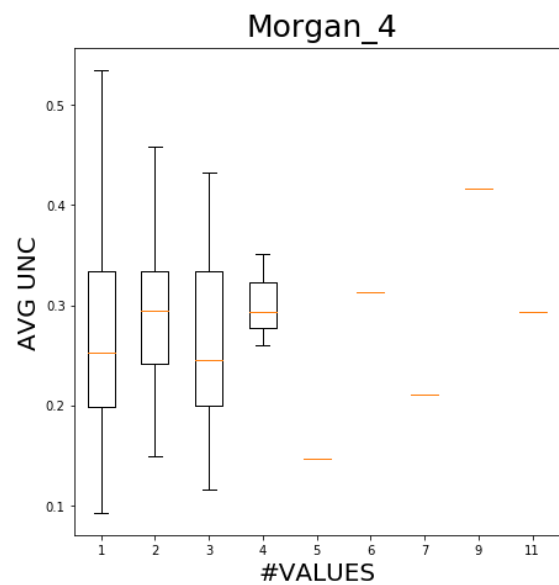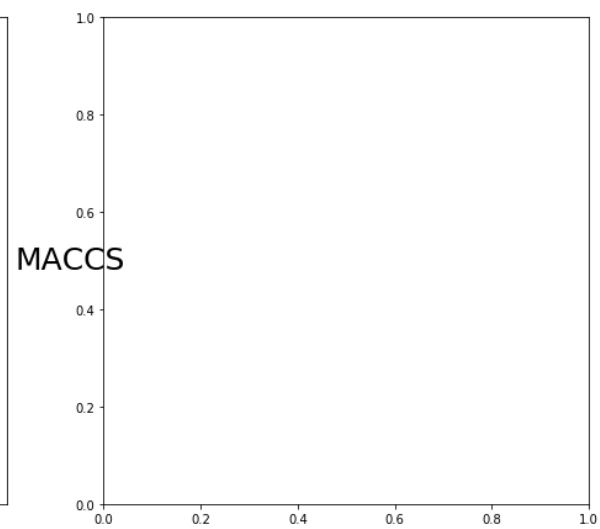

CV

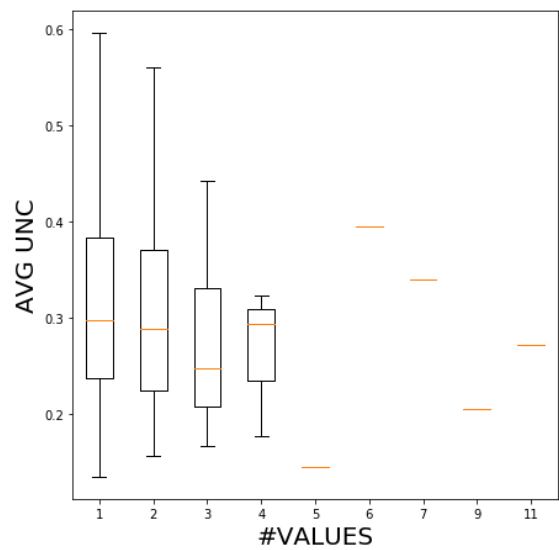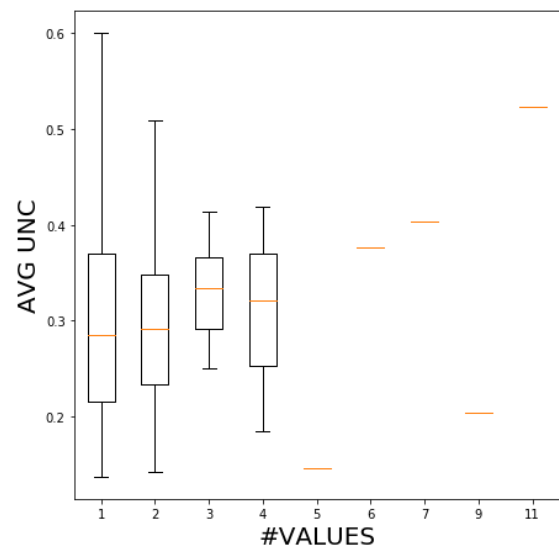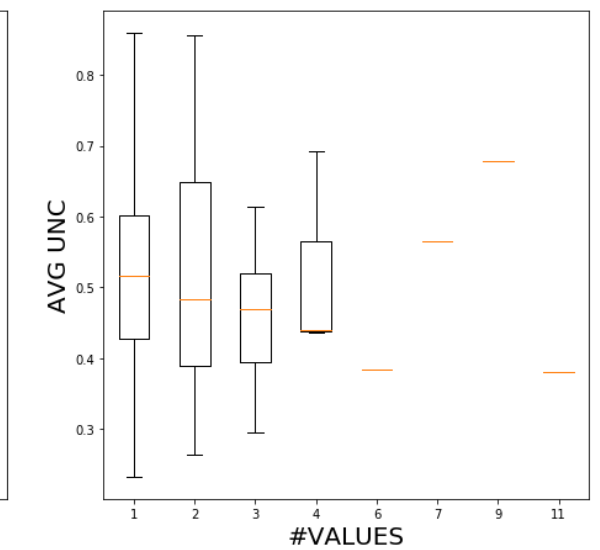

BAC

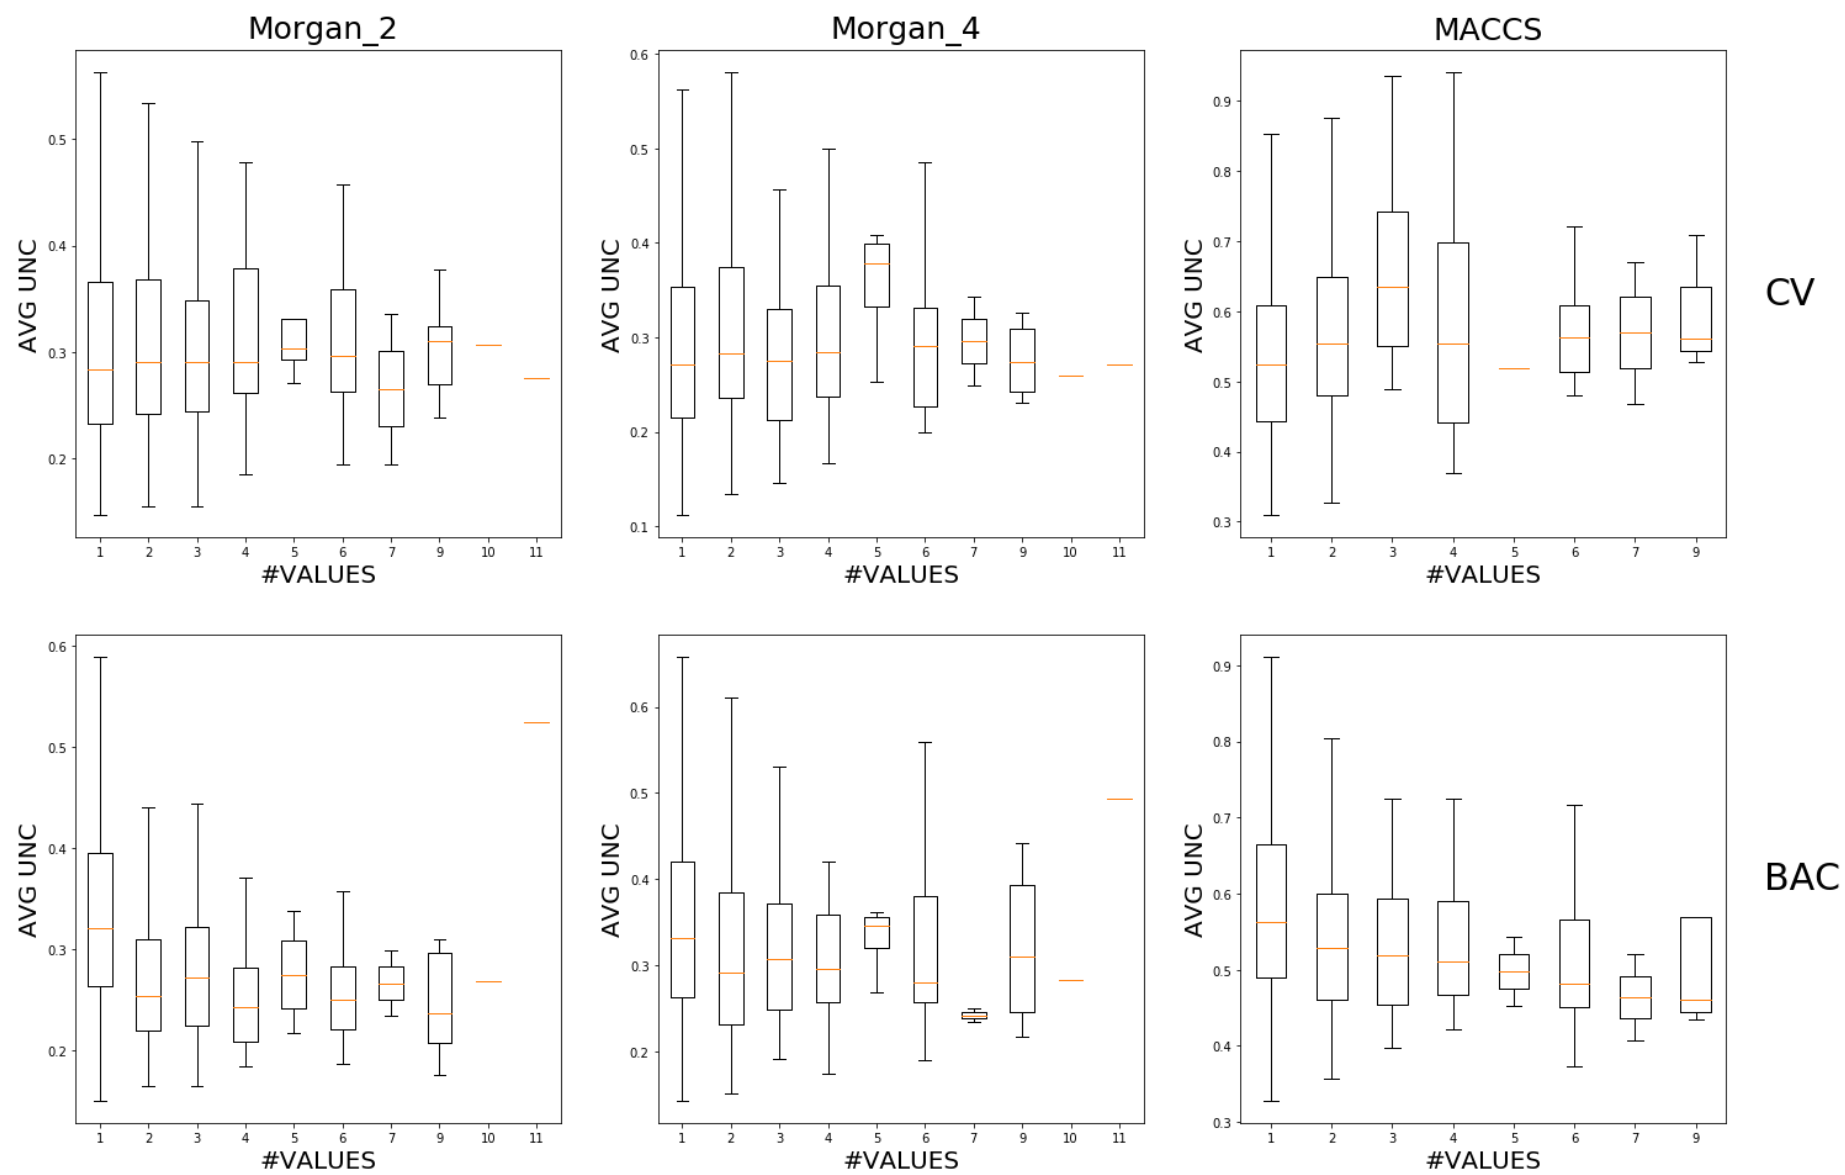

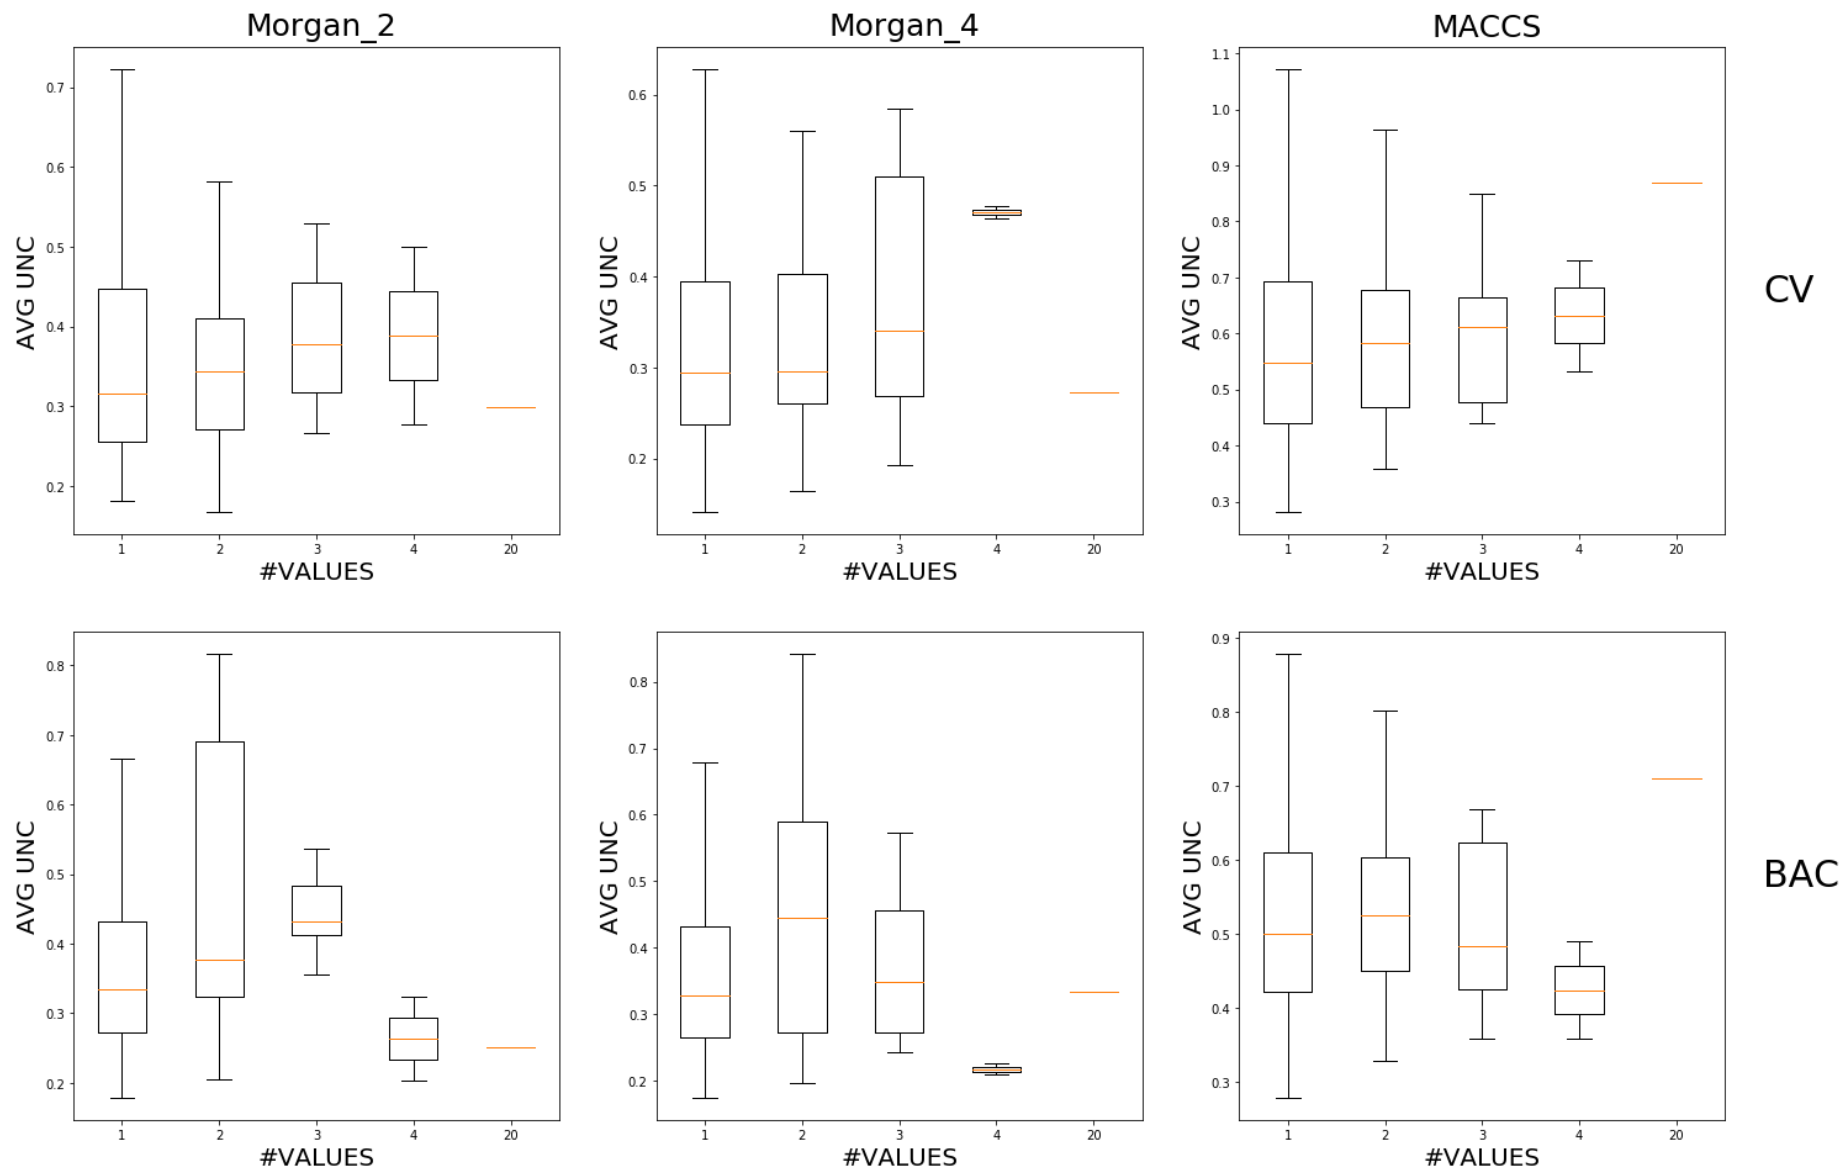

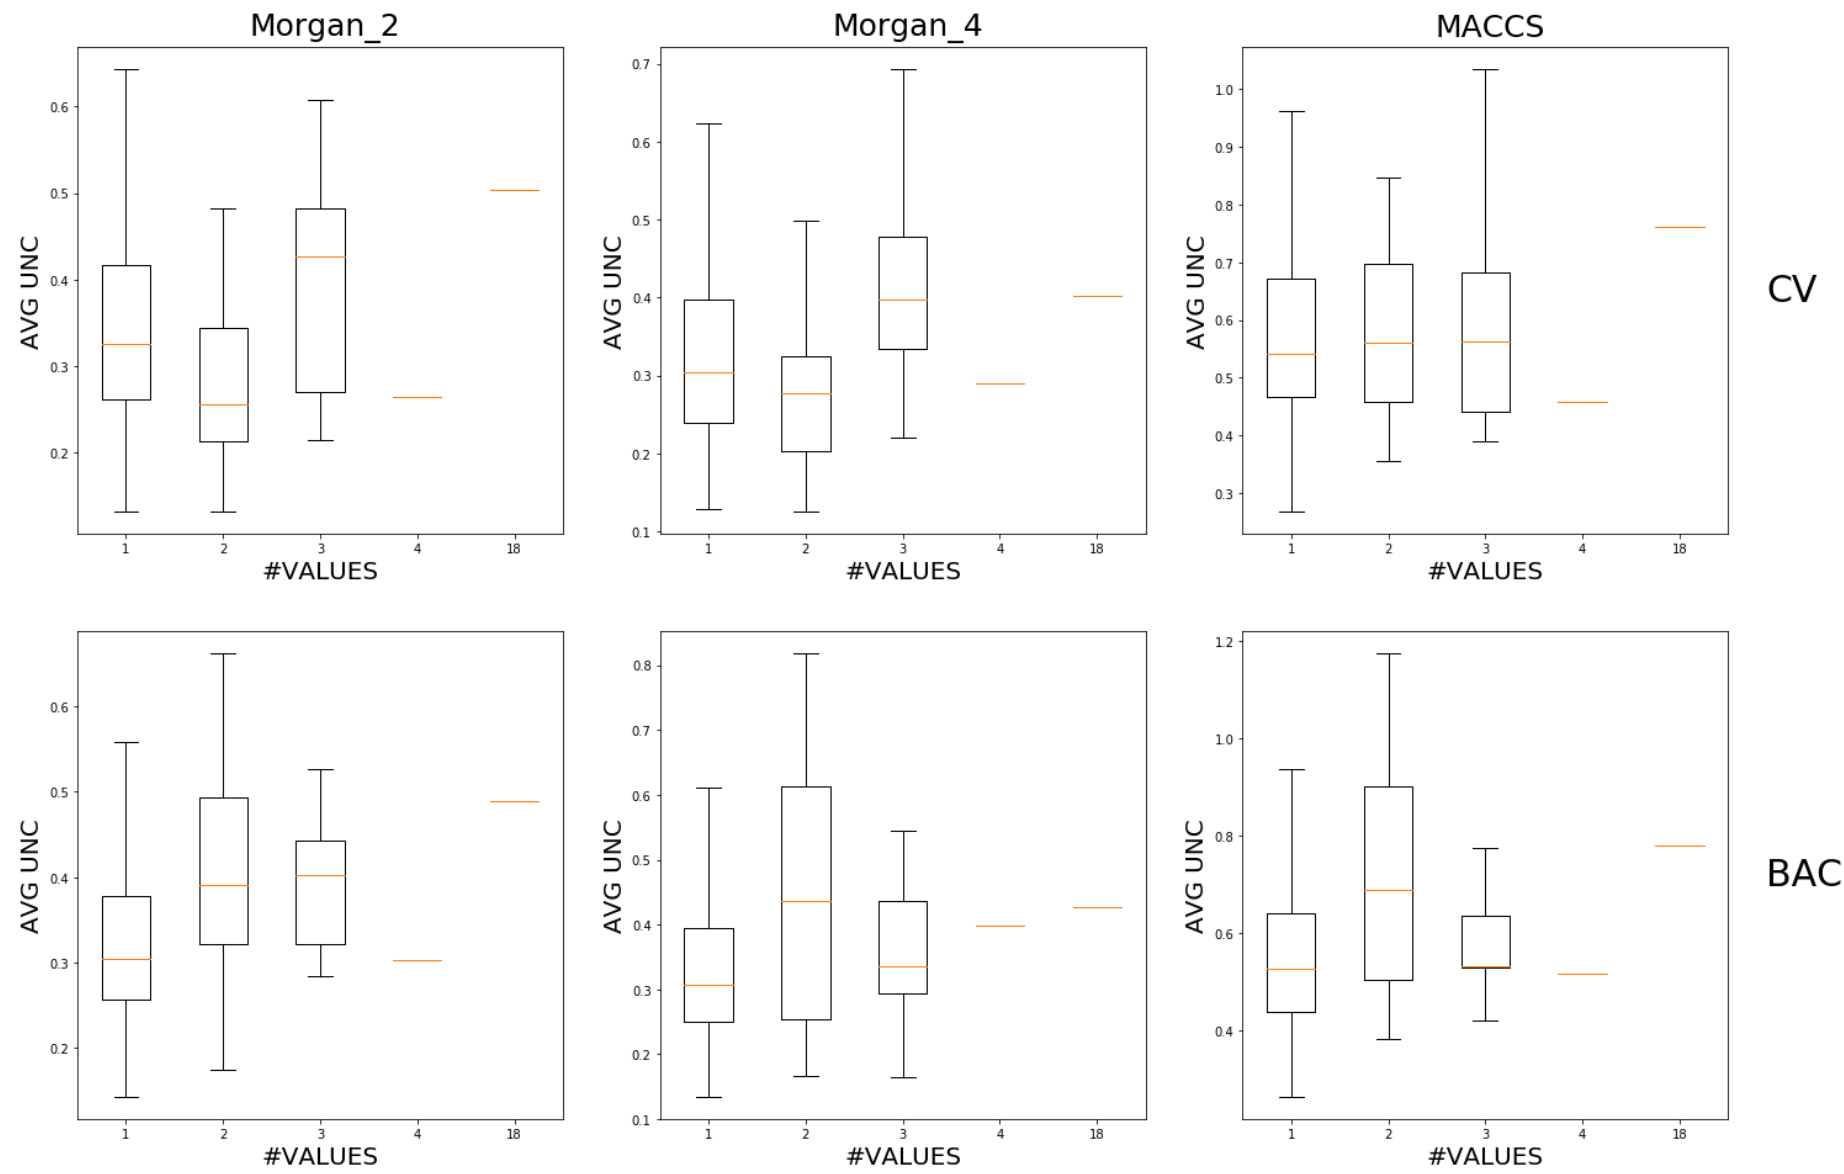

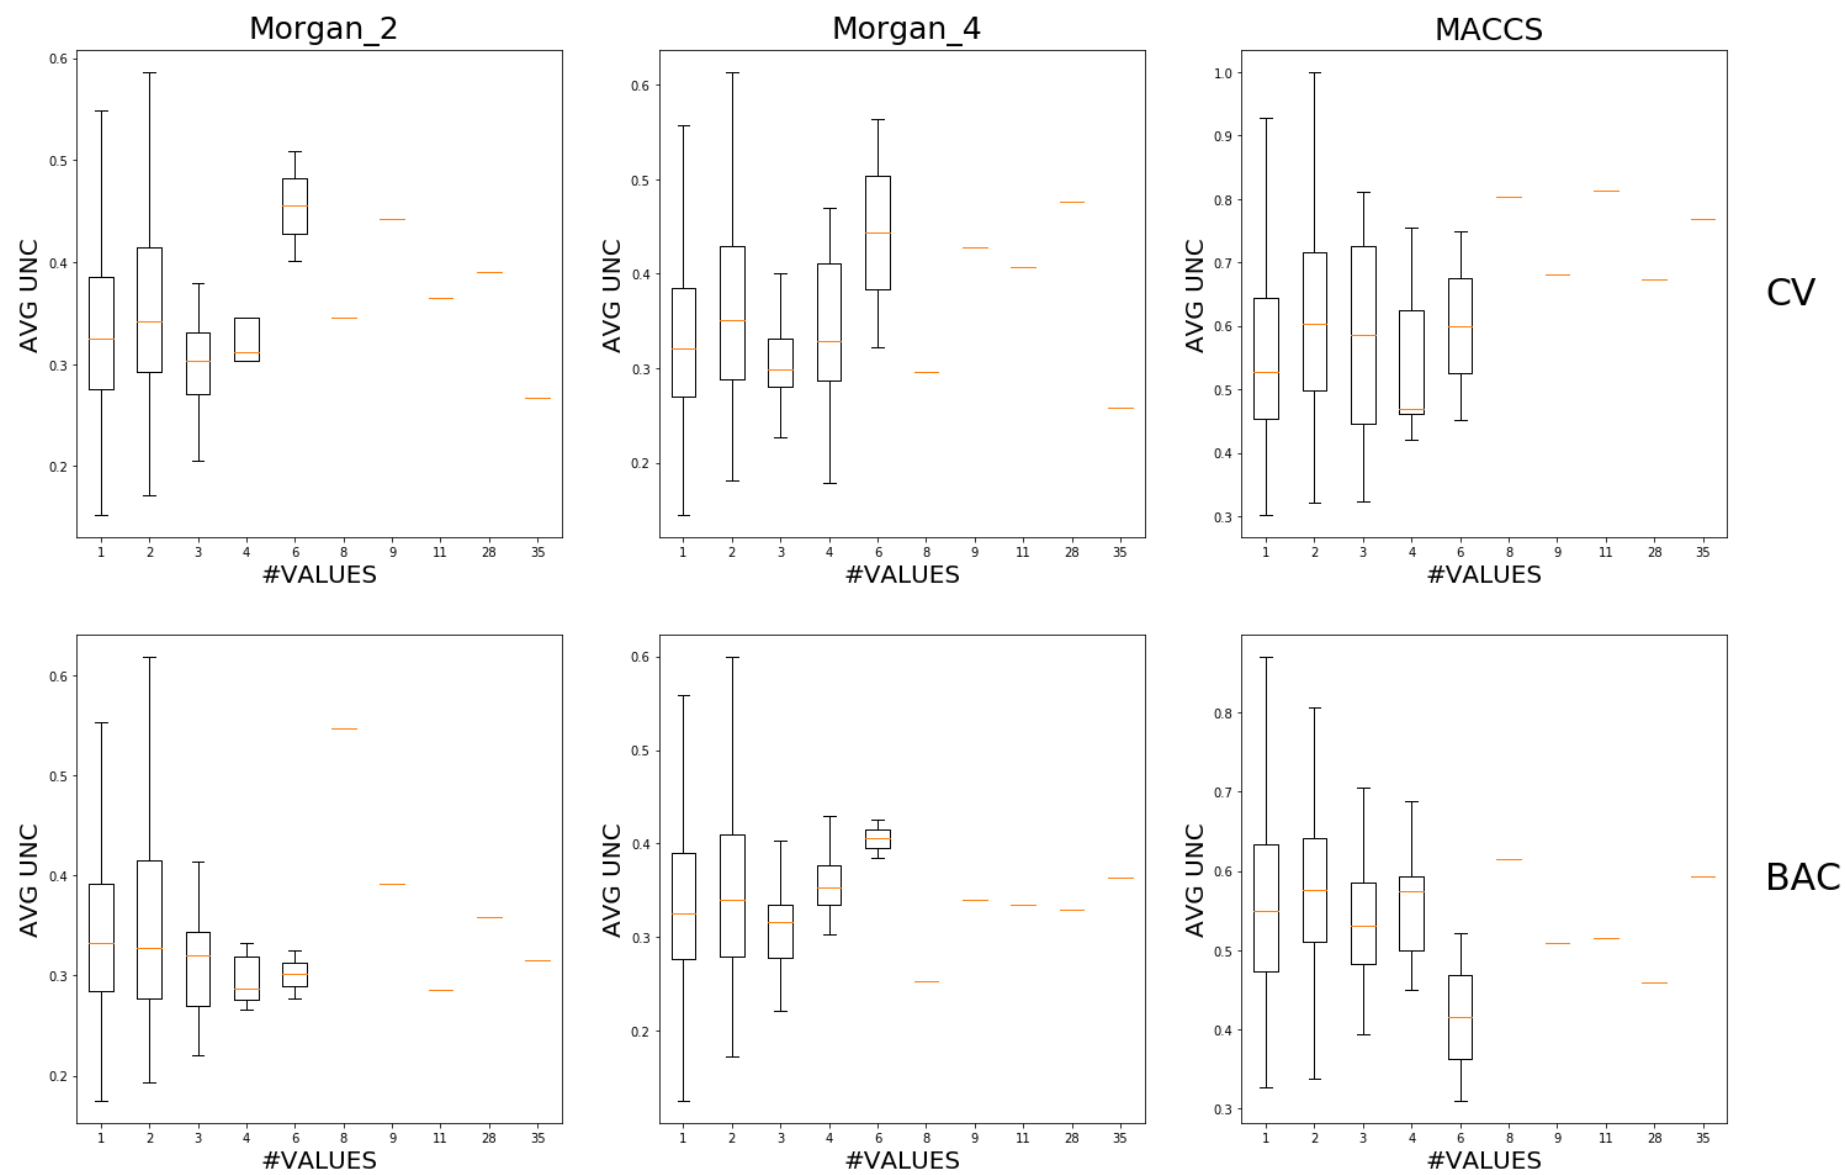

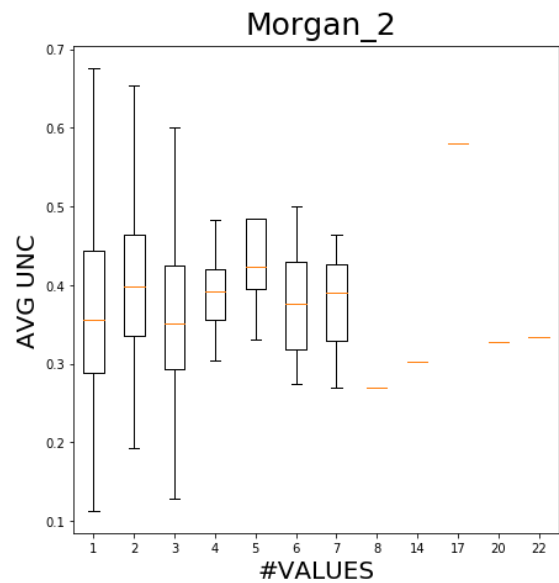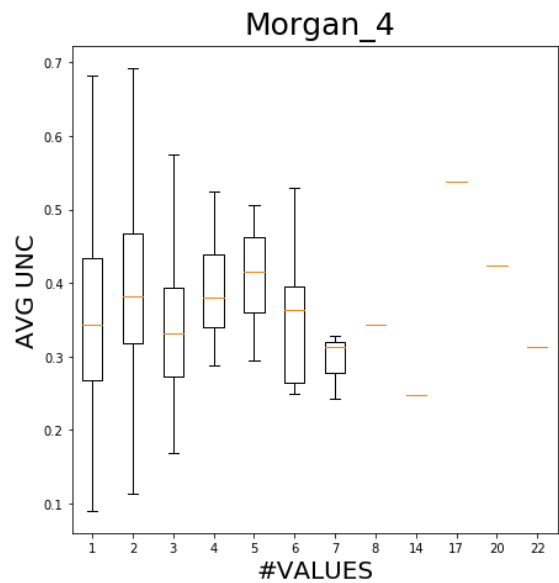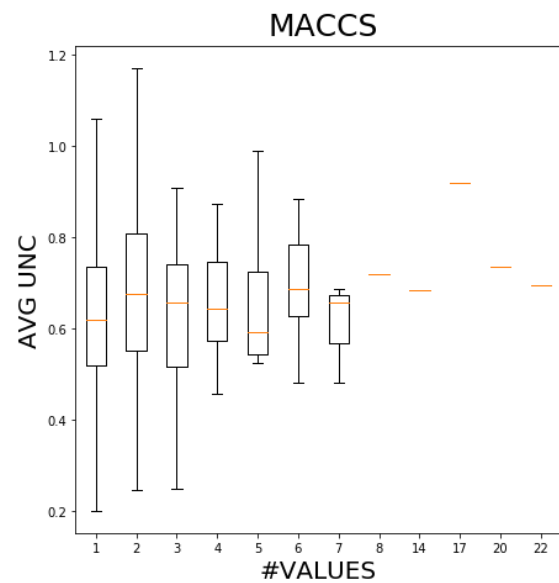

CV

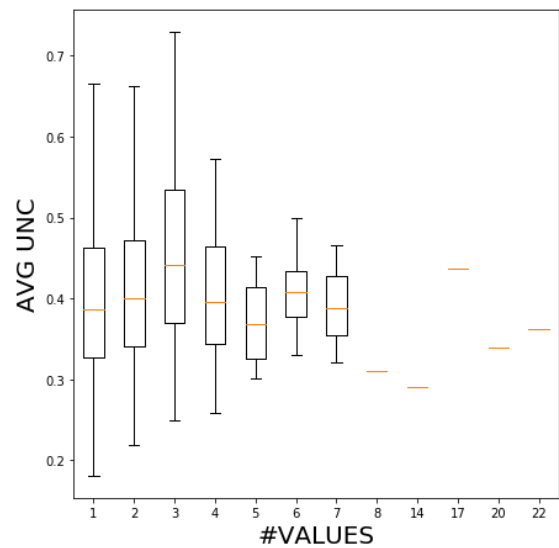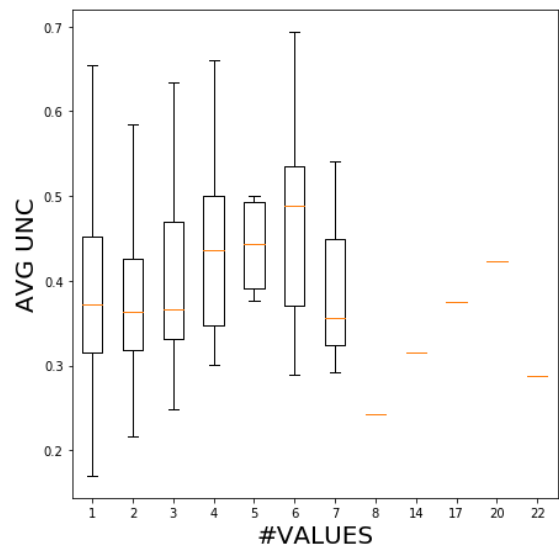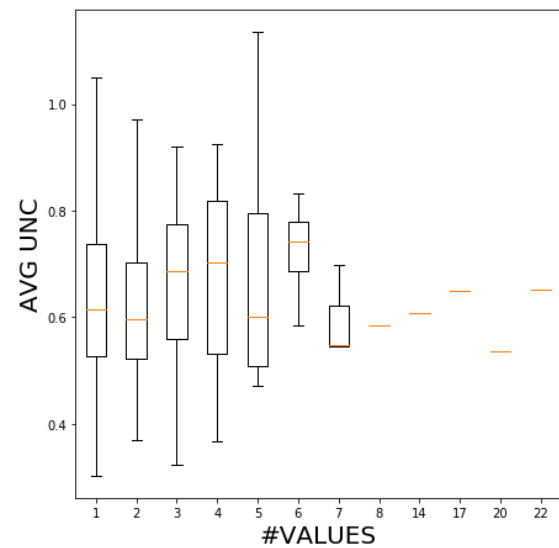

BAC

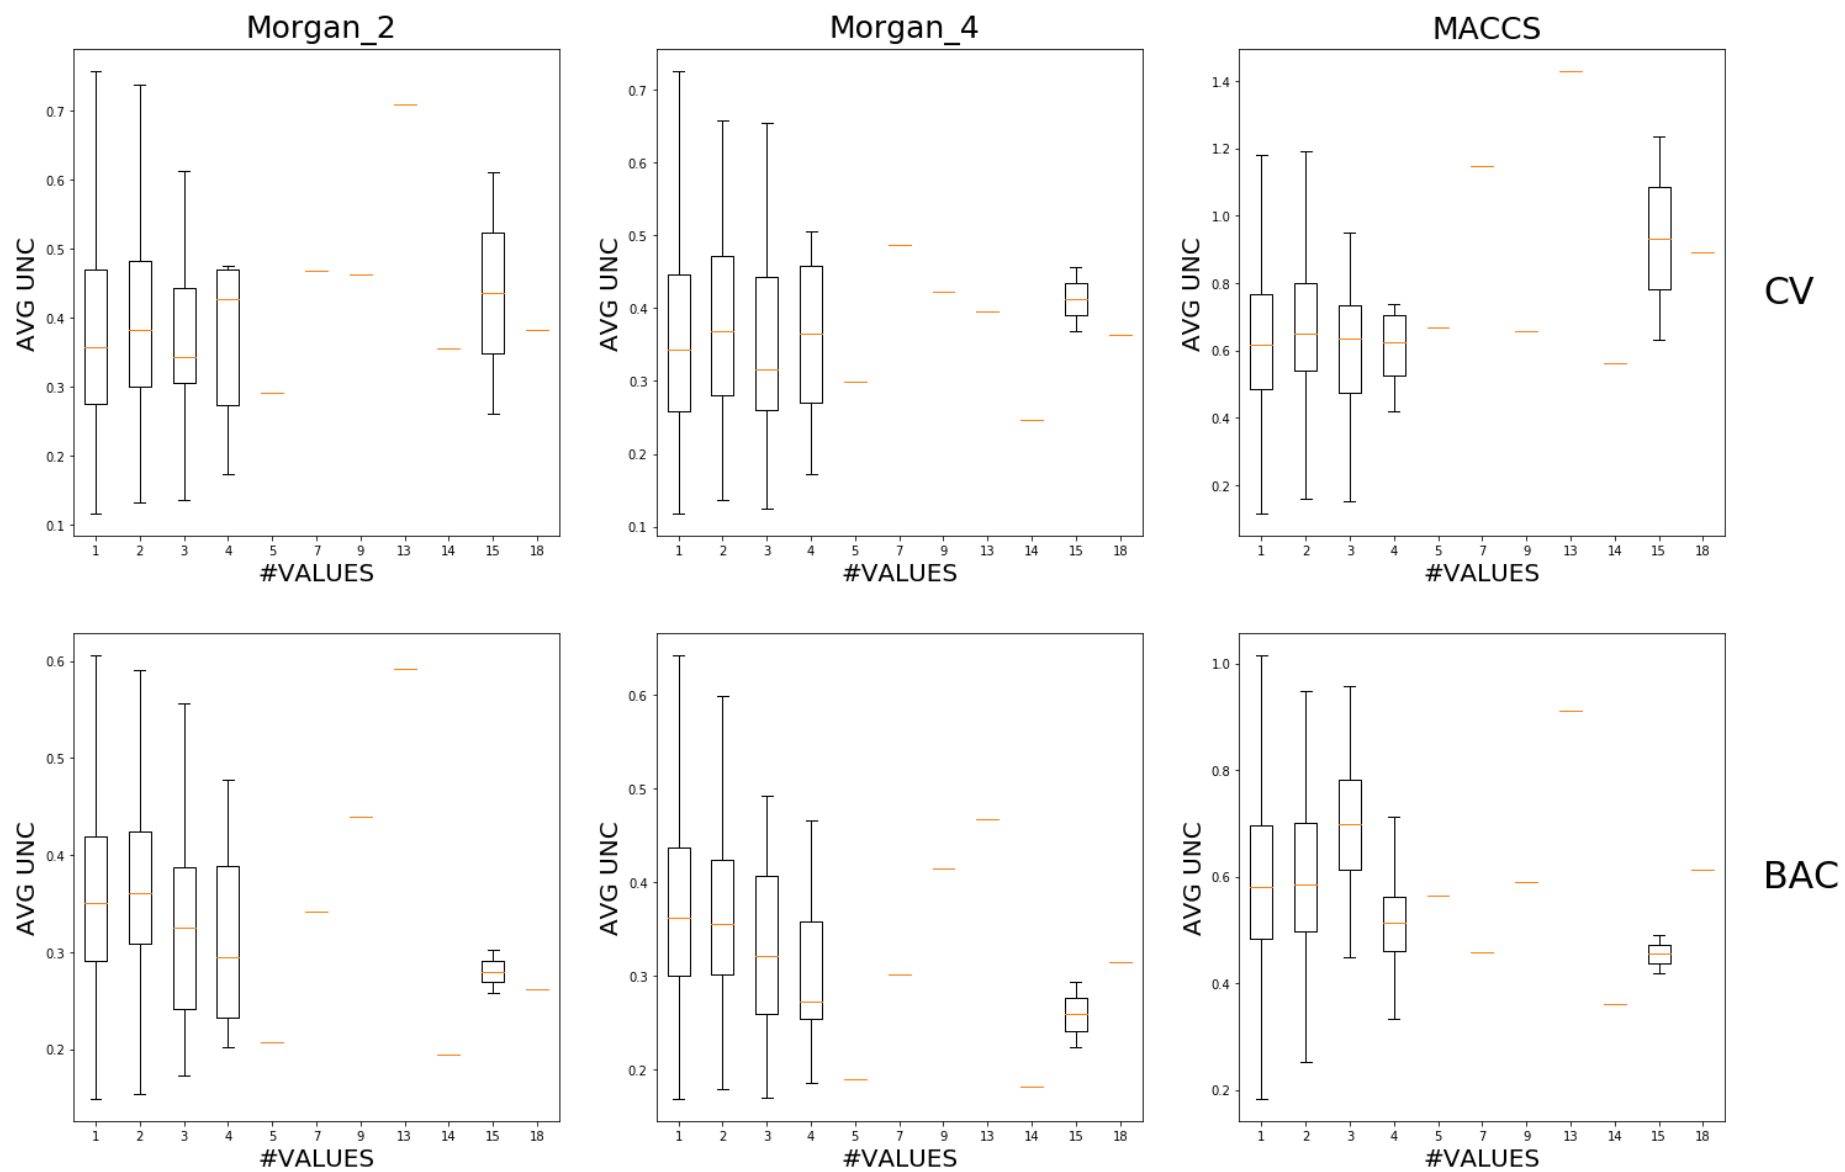

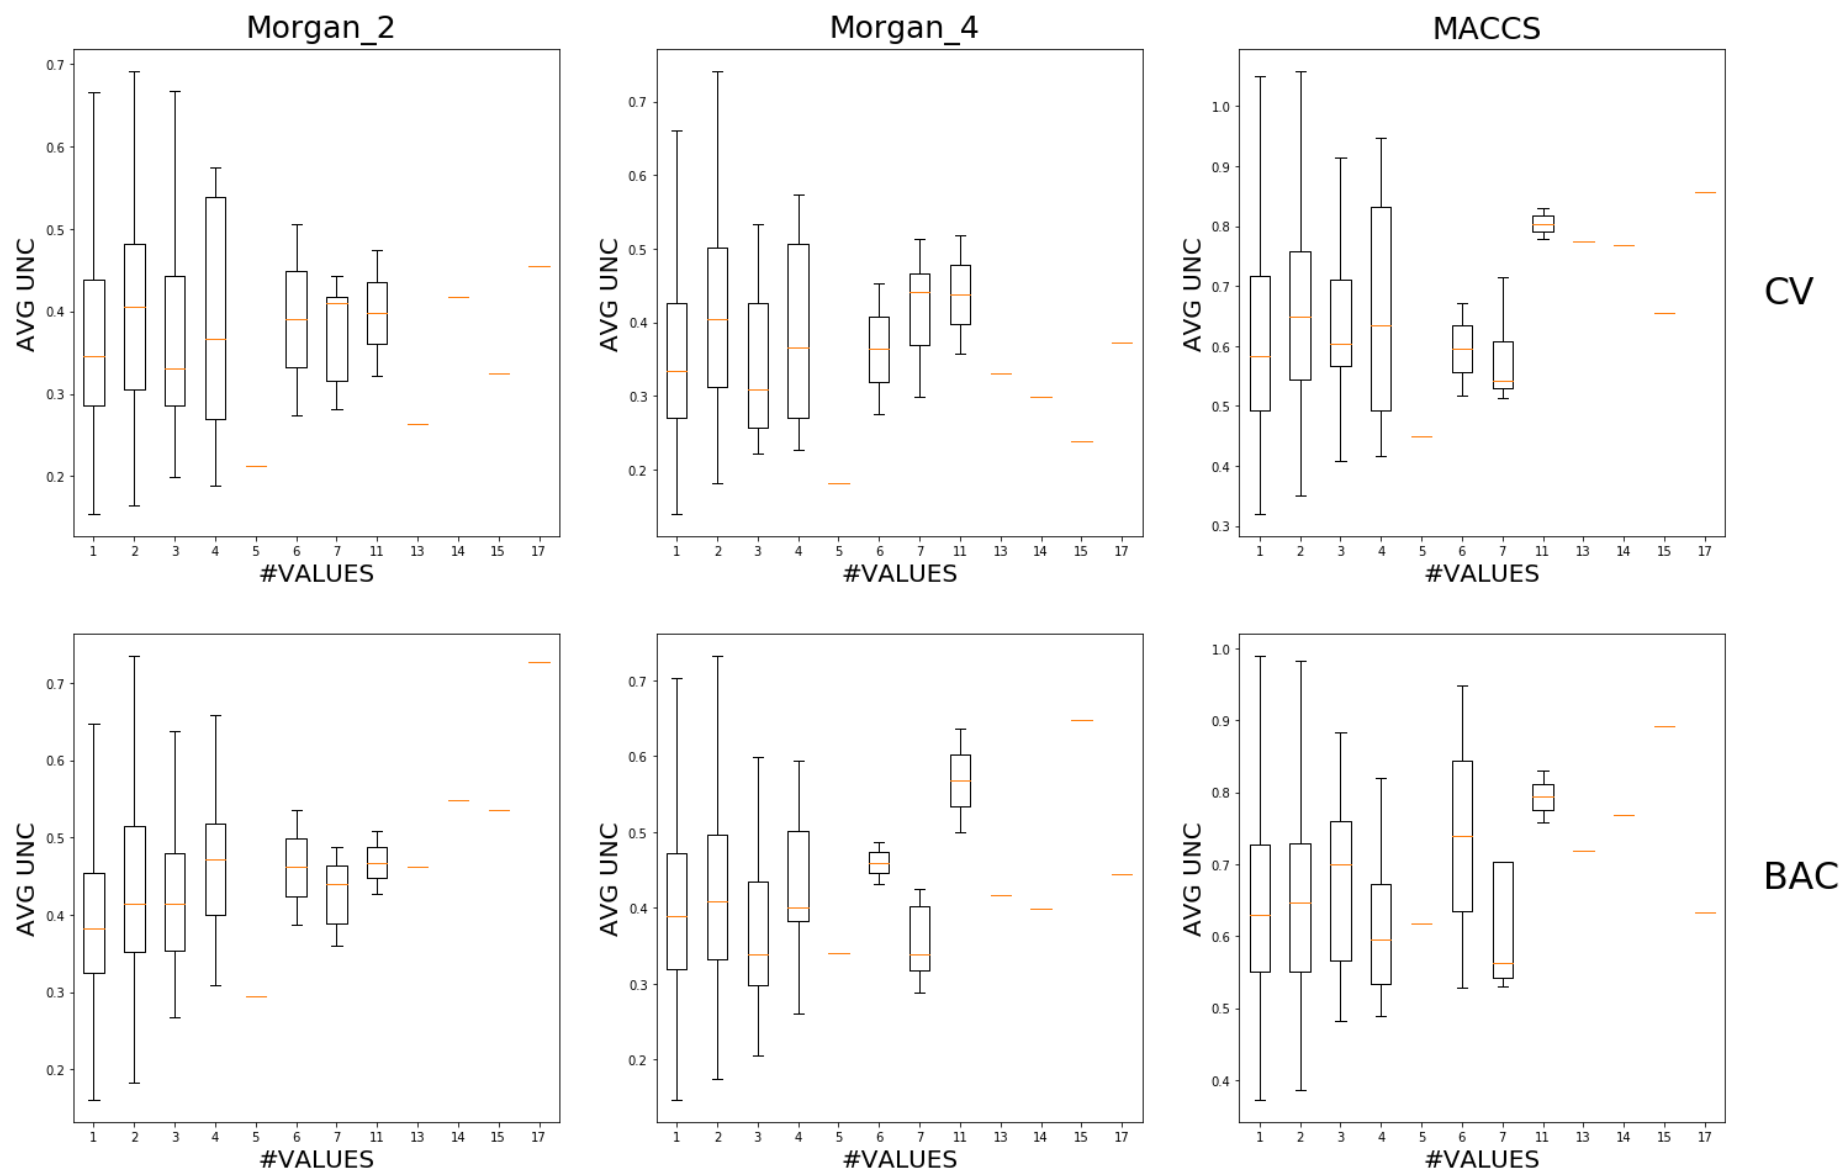



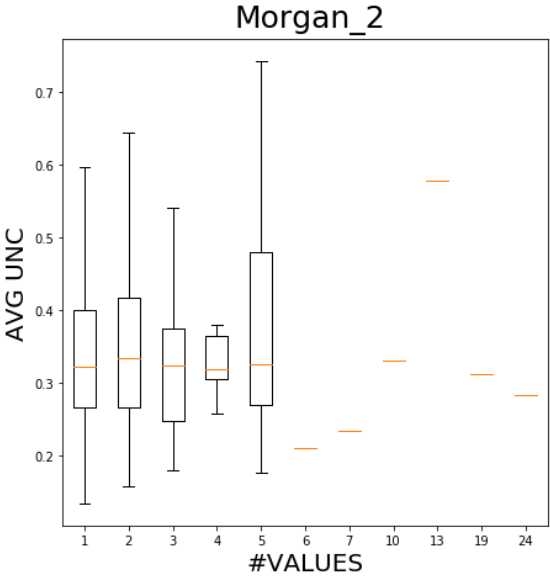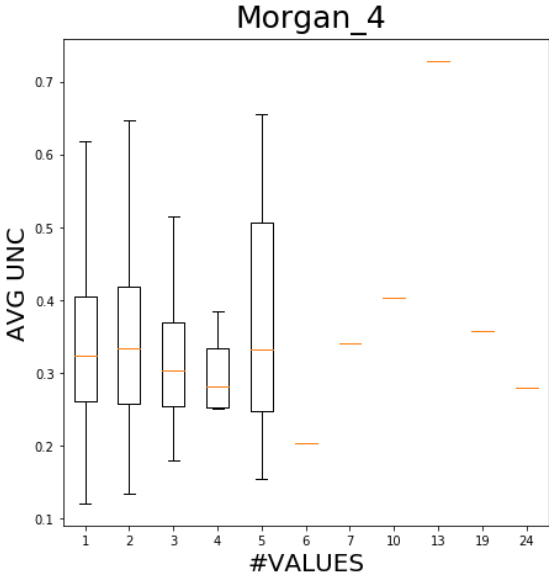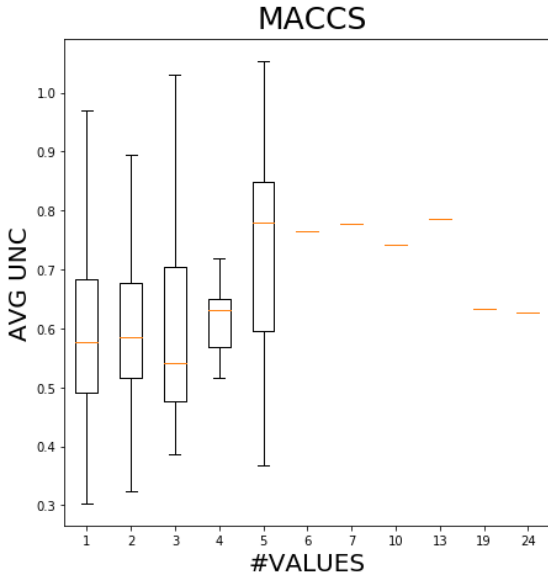

CV

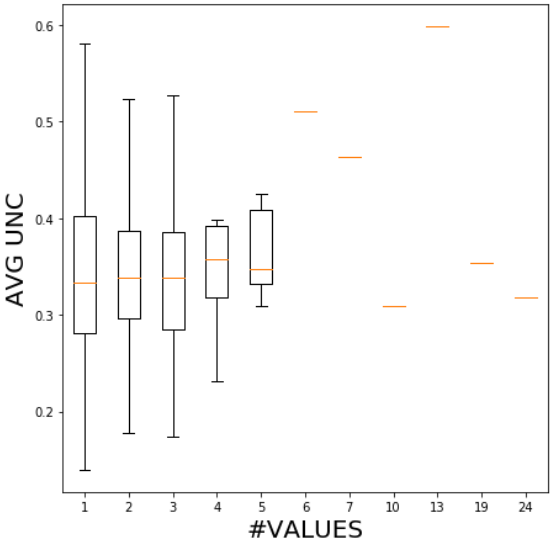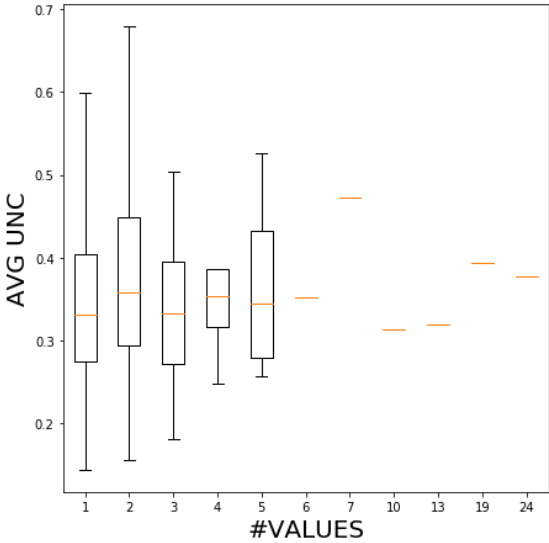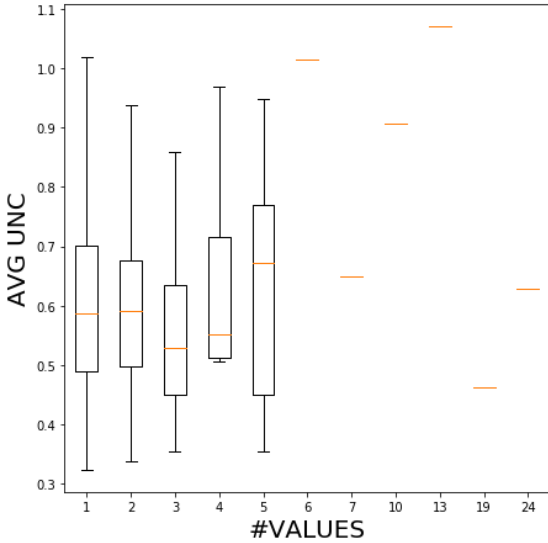

BAC

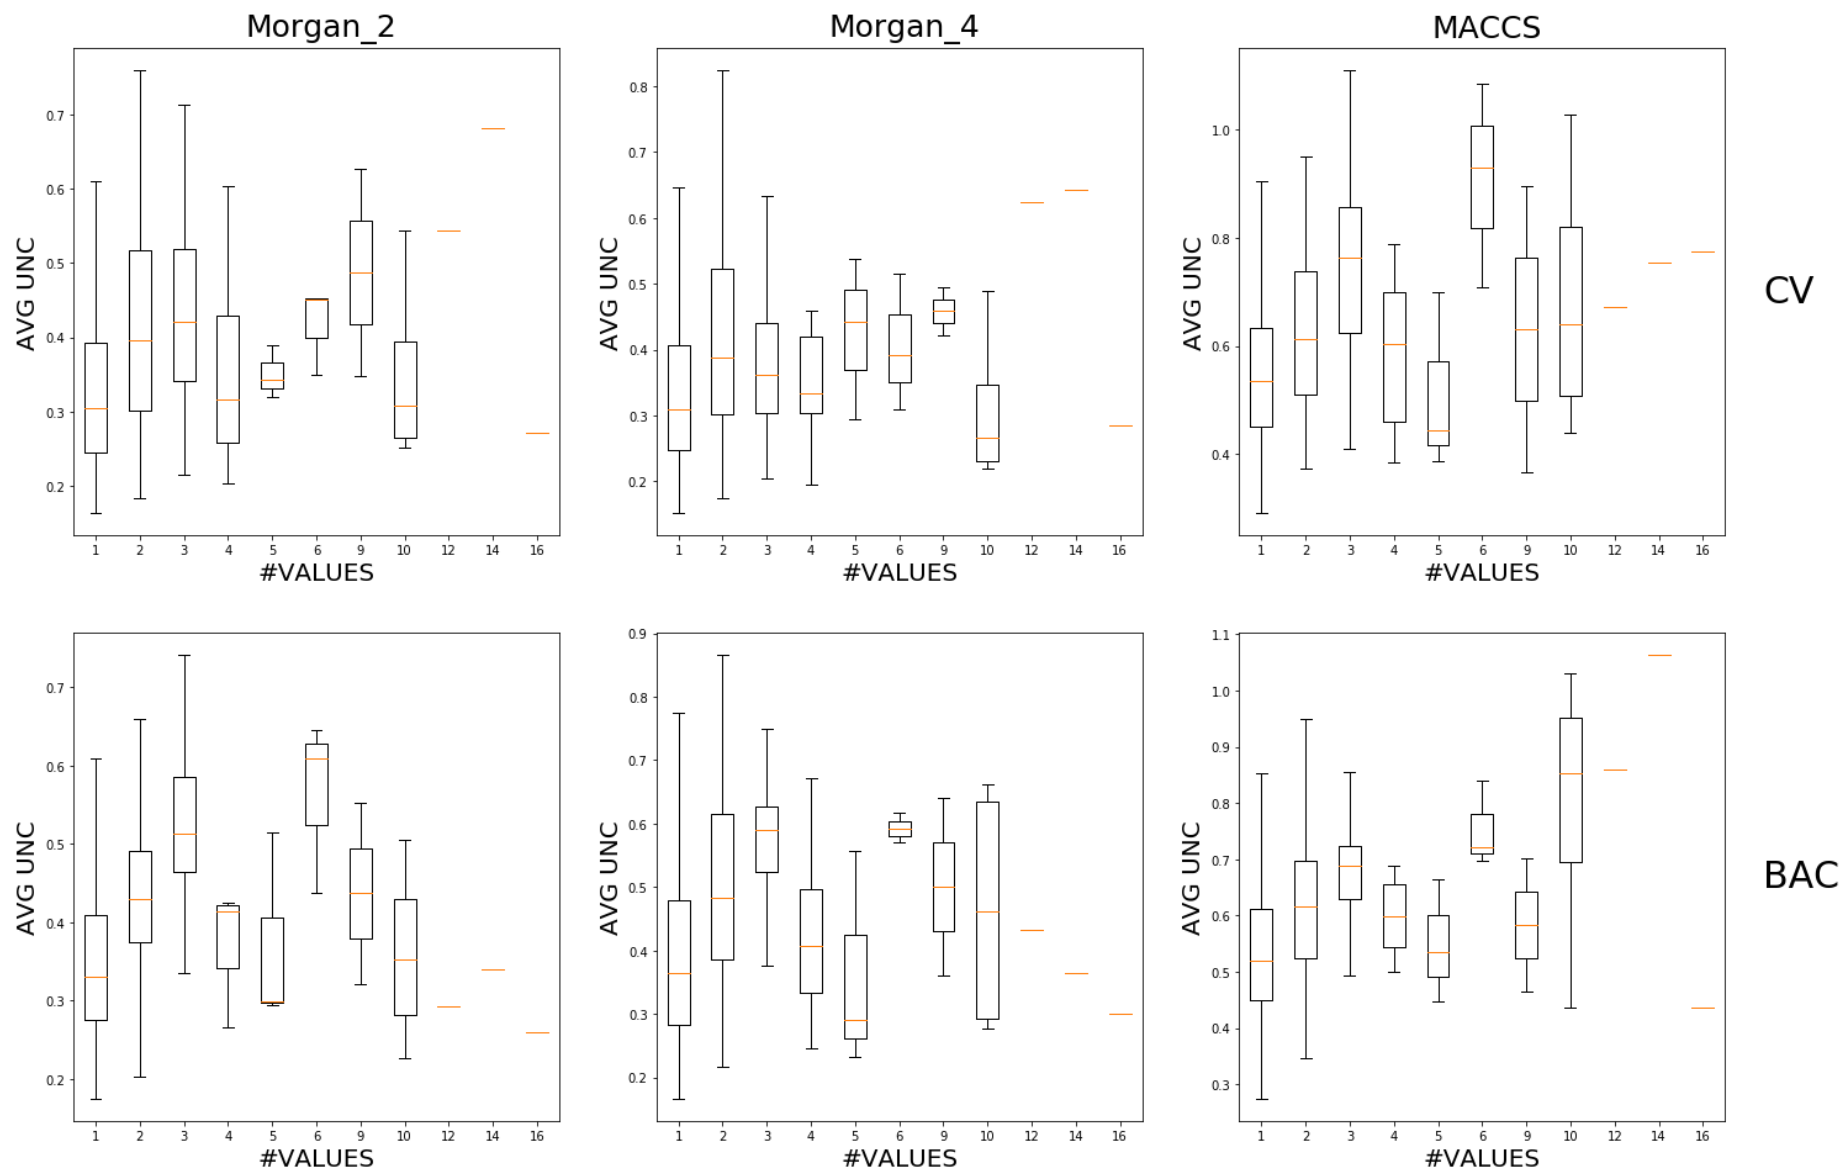

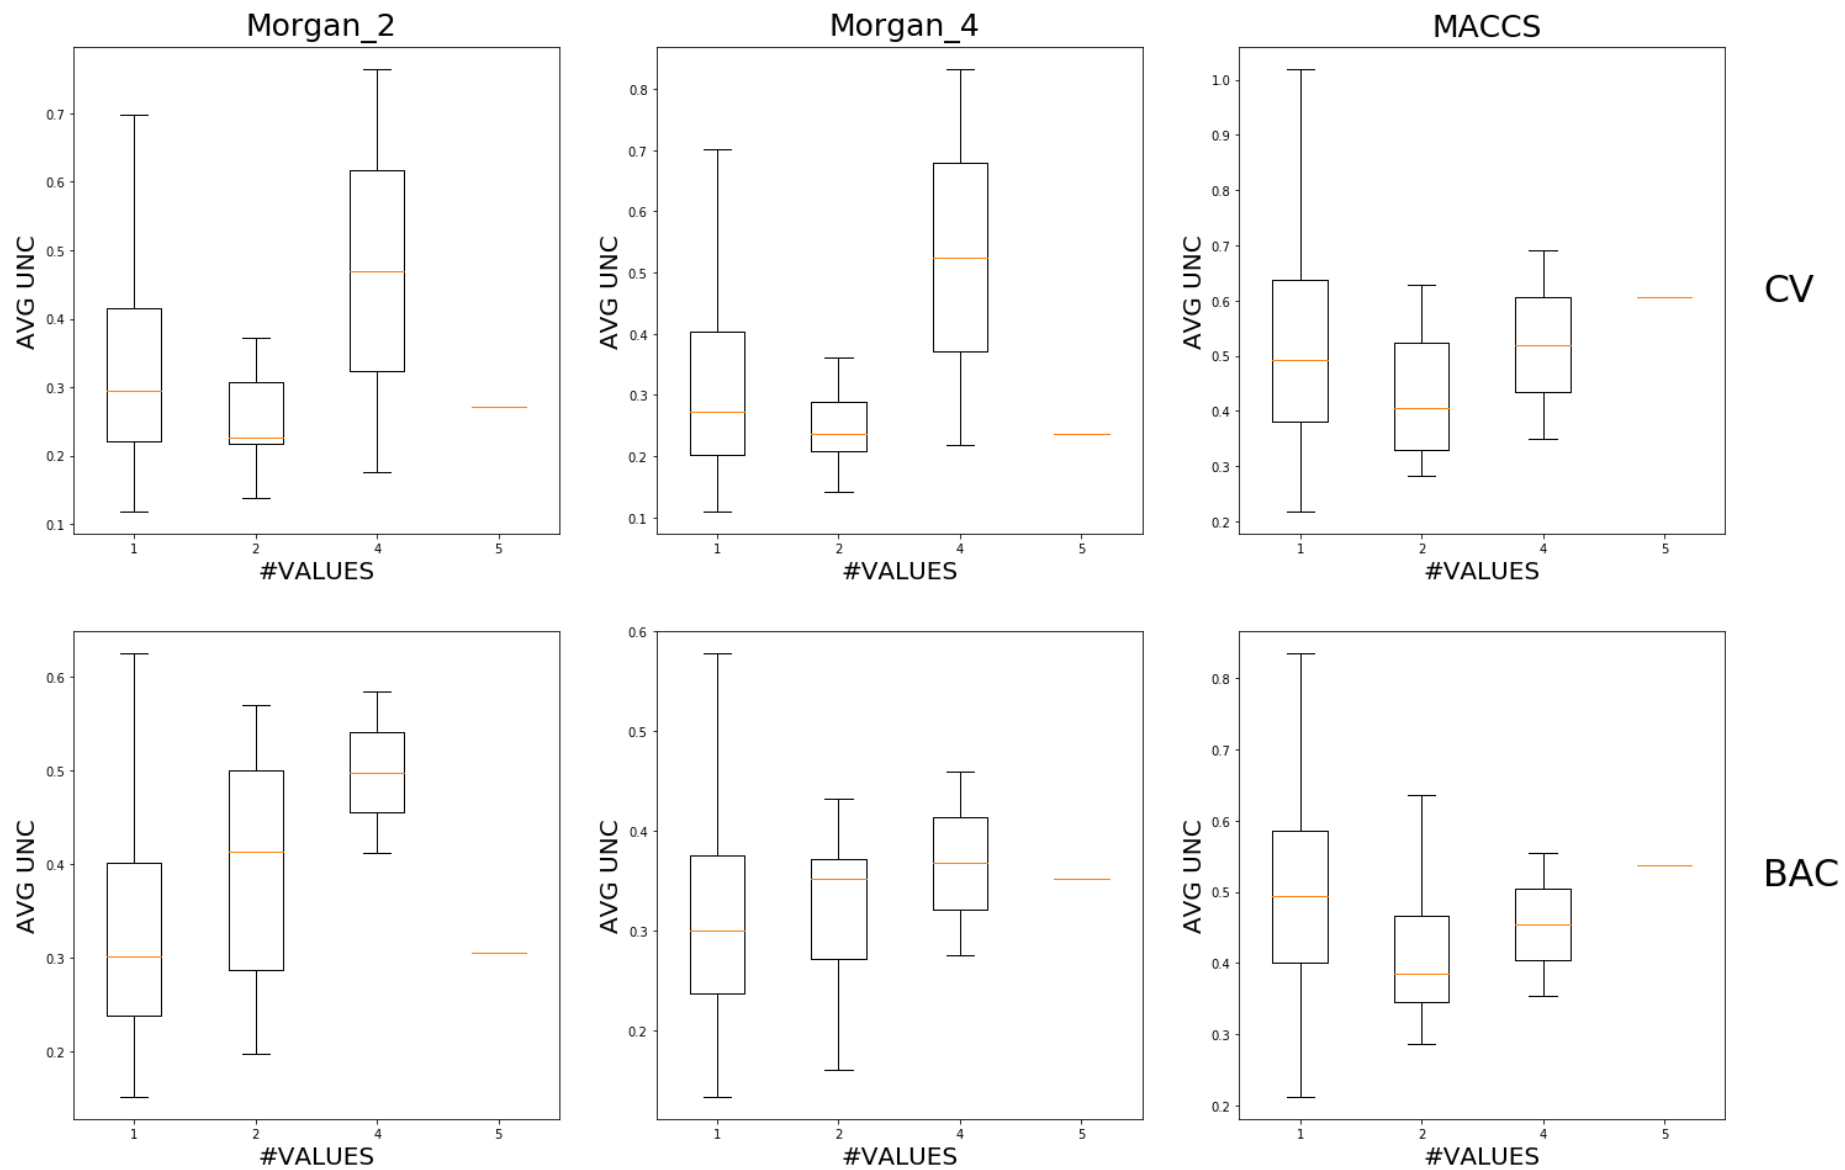

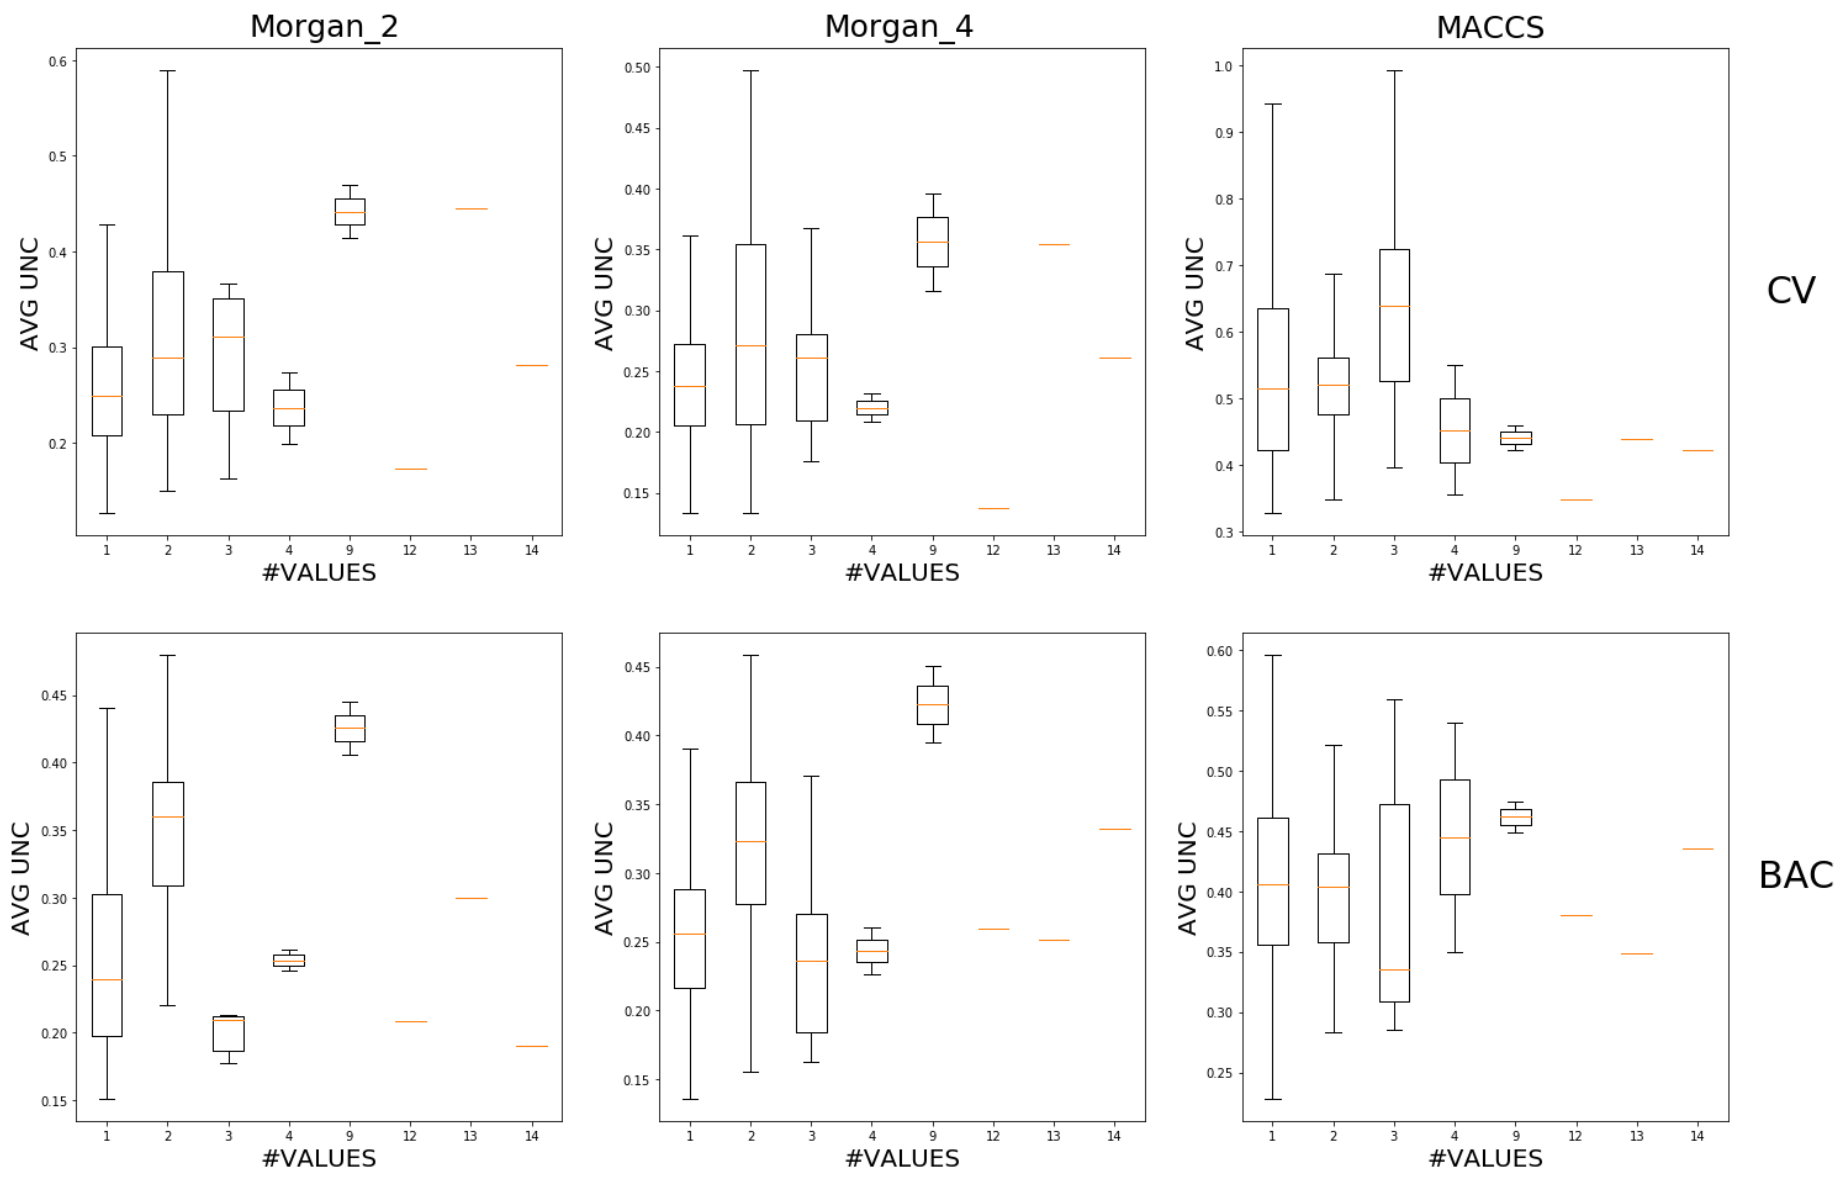

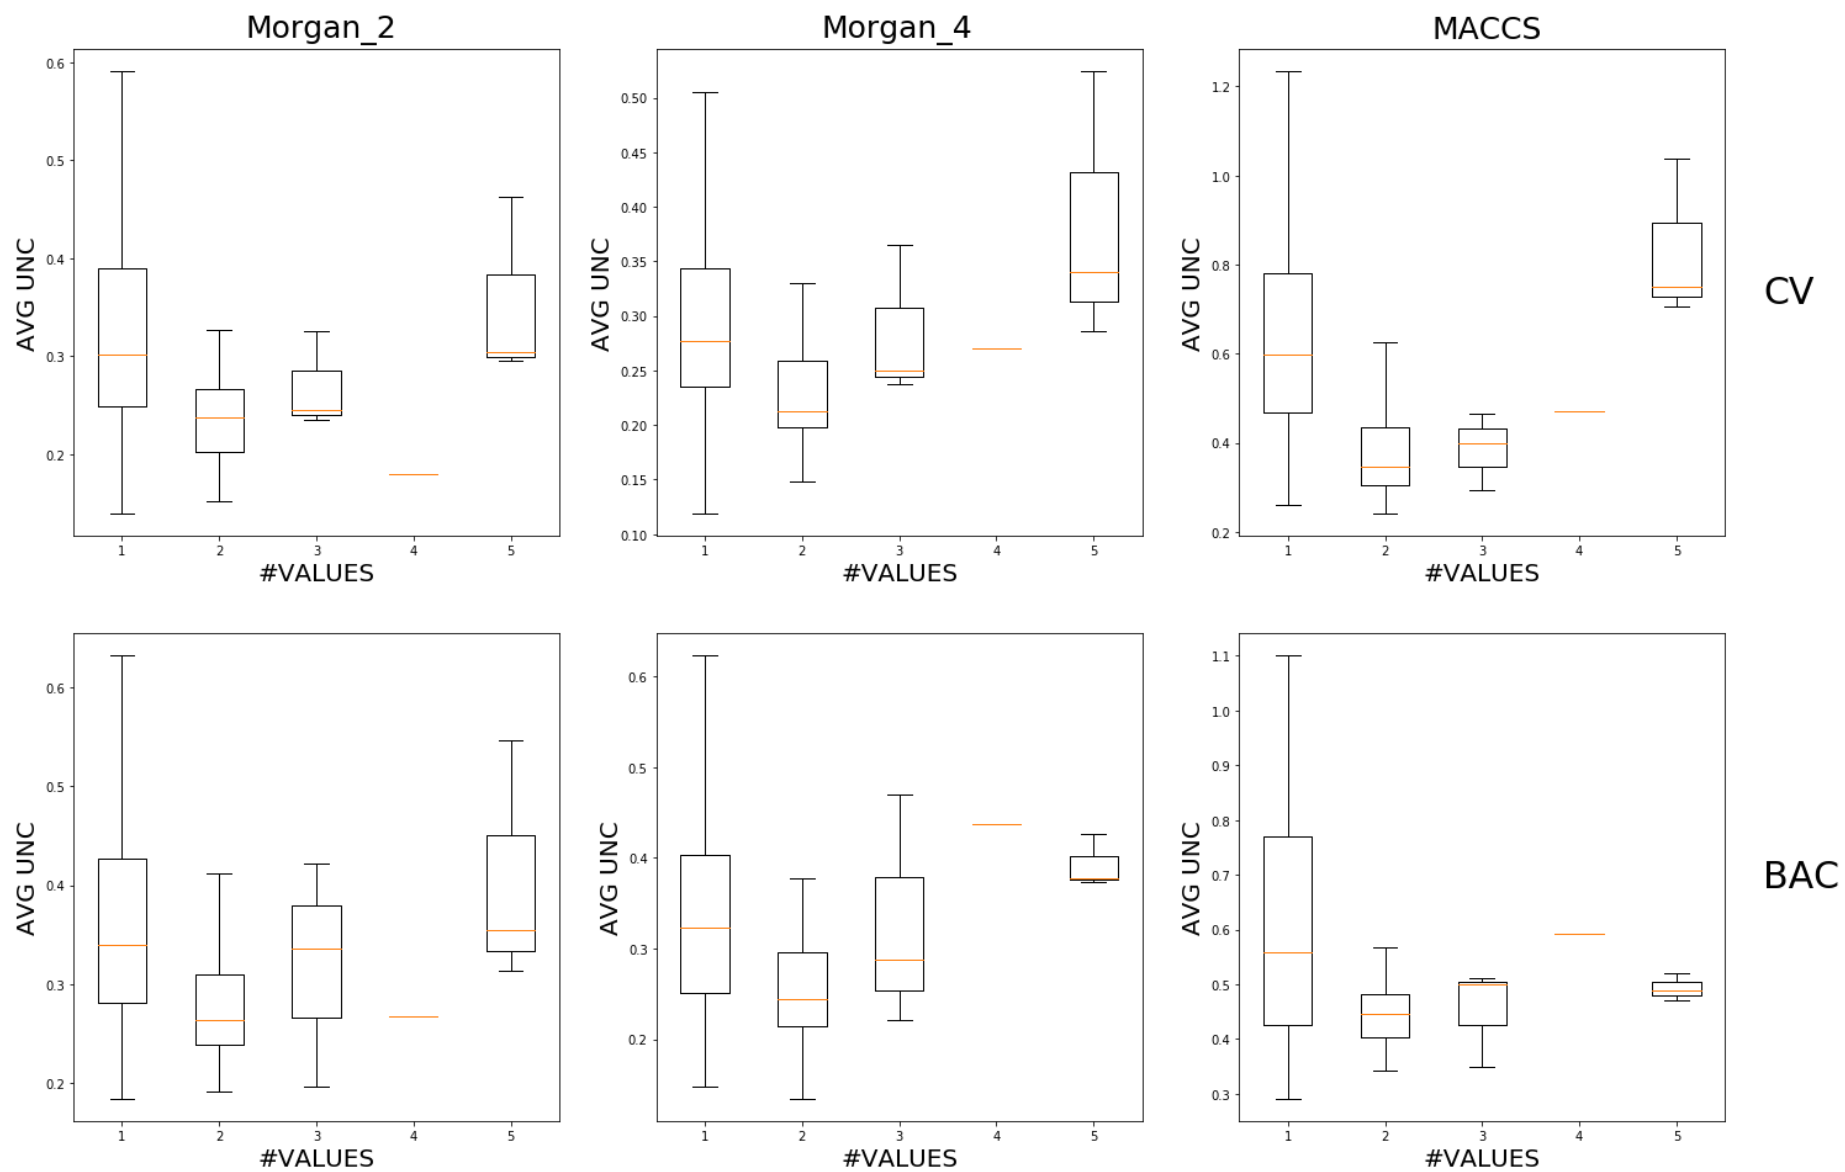

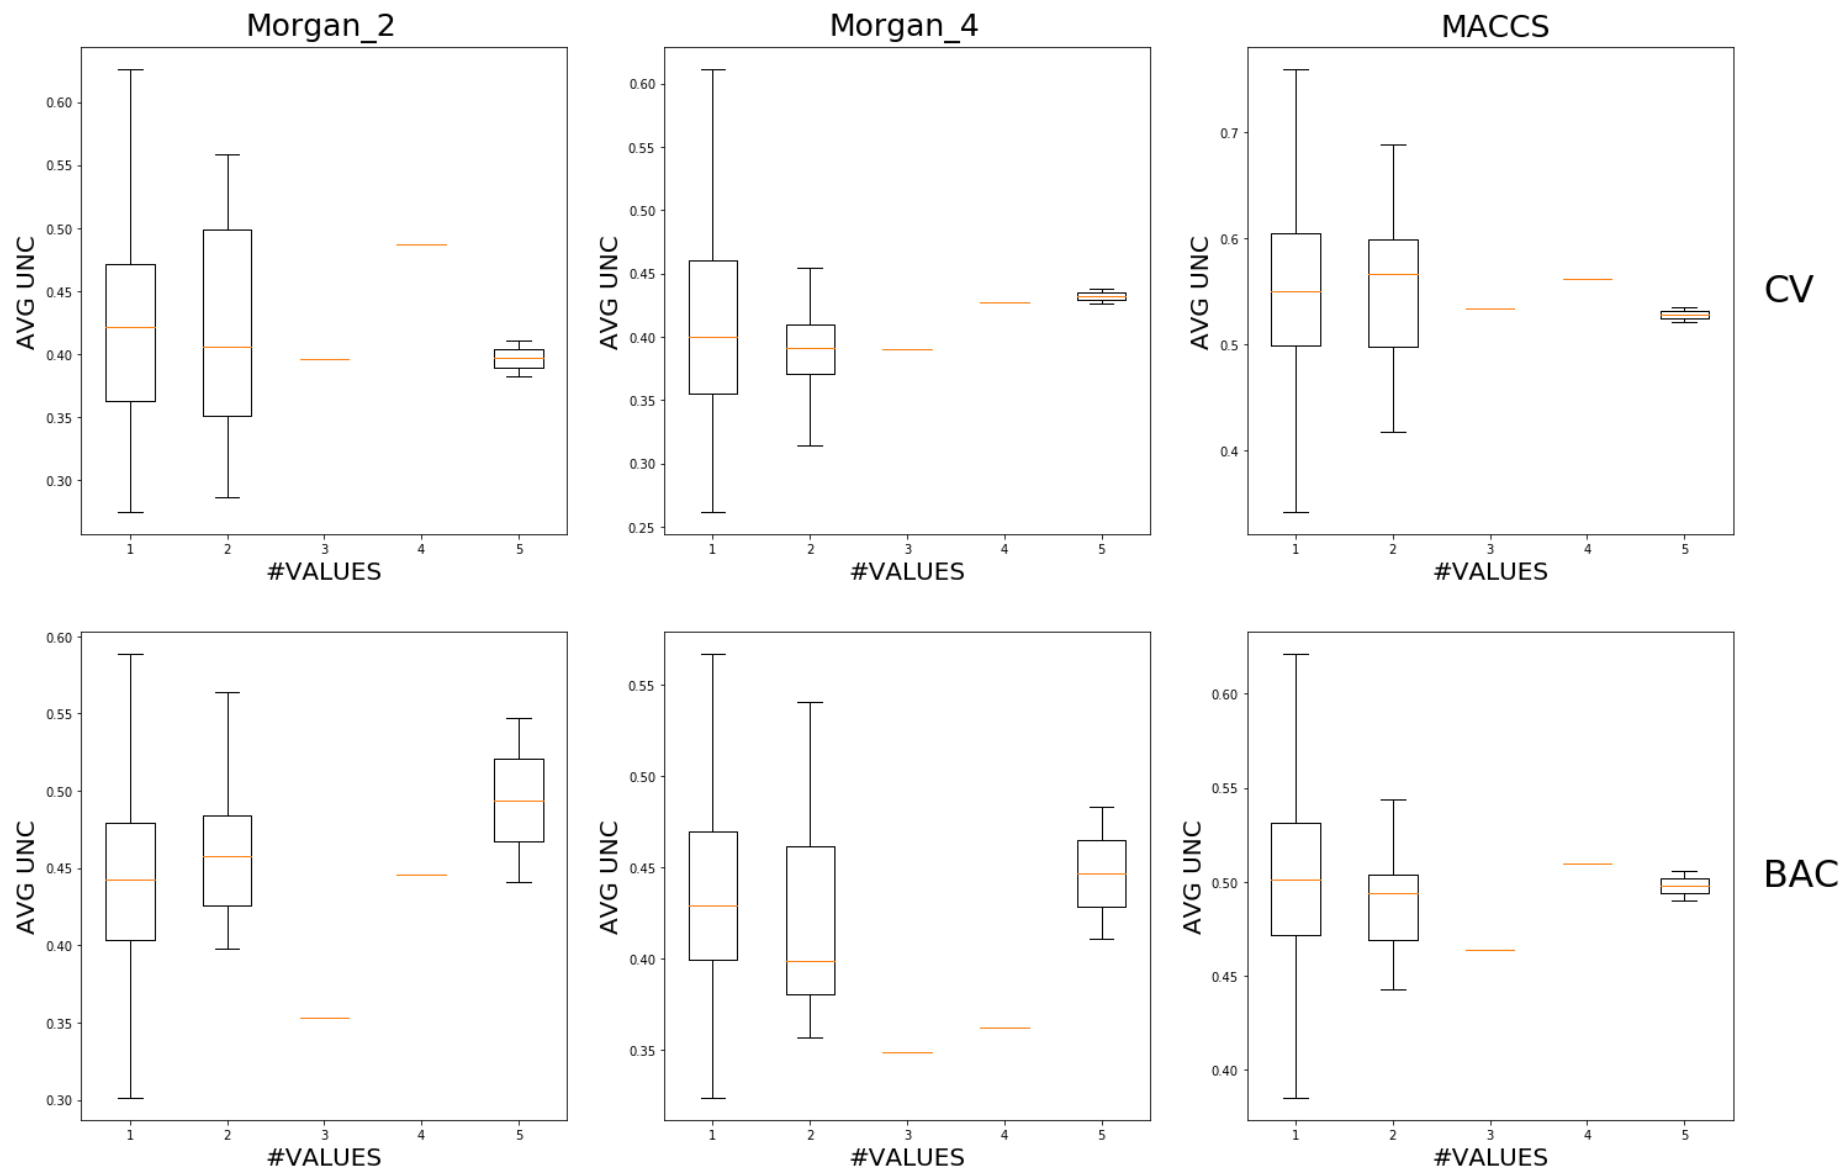

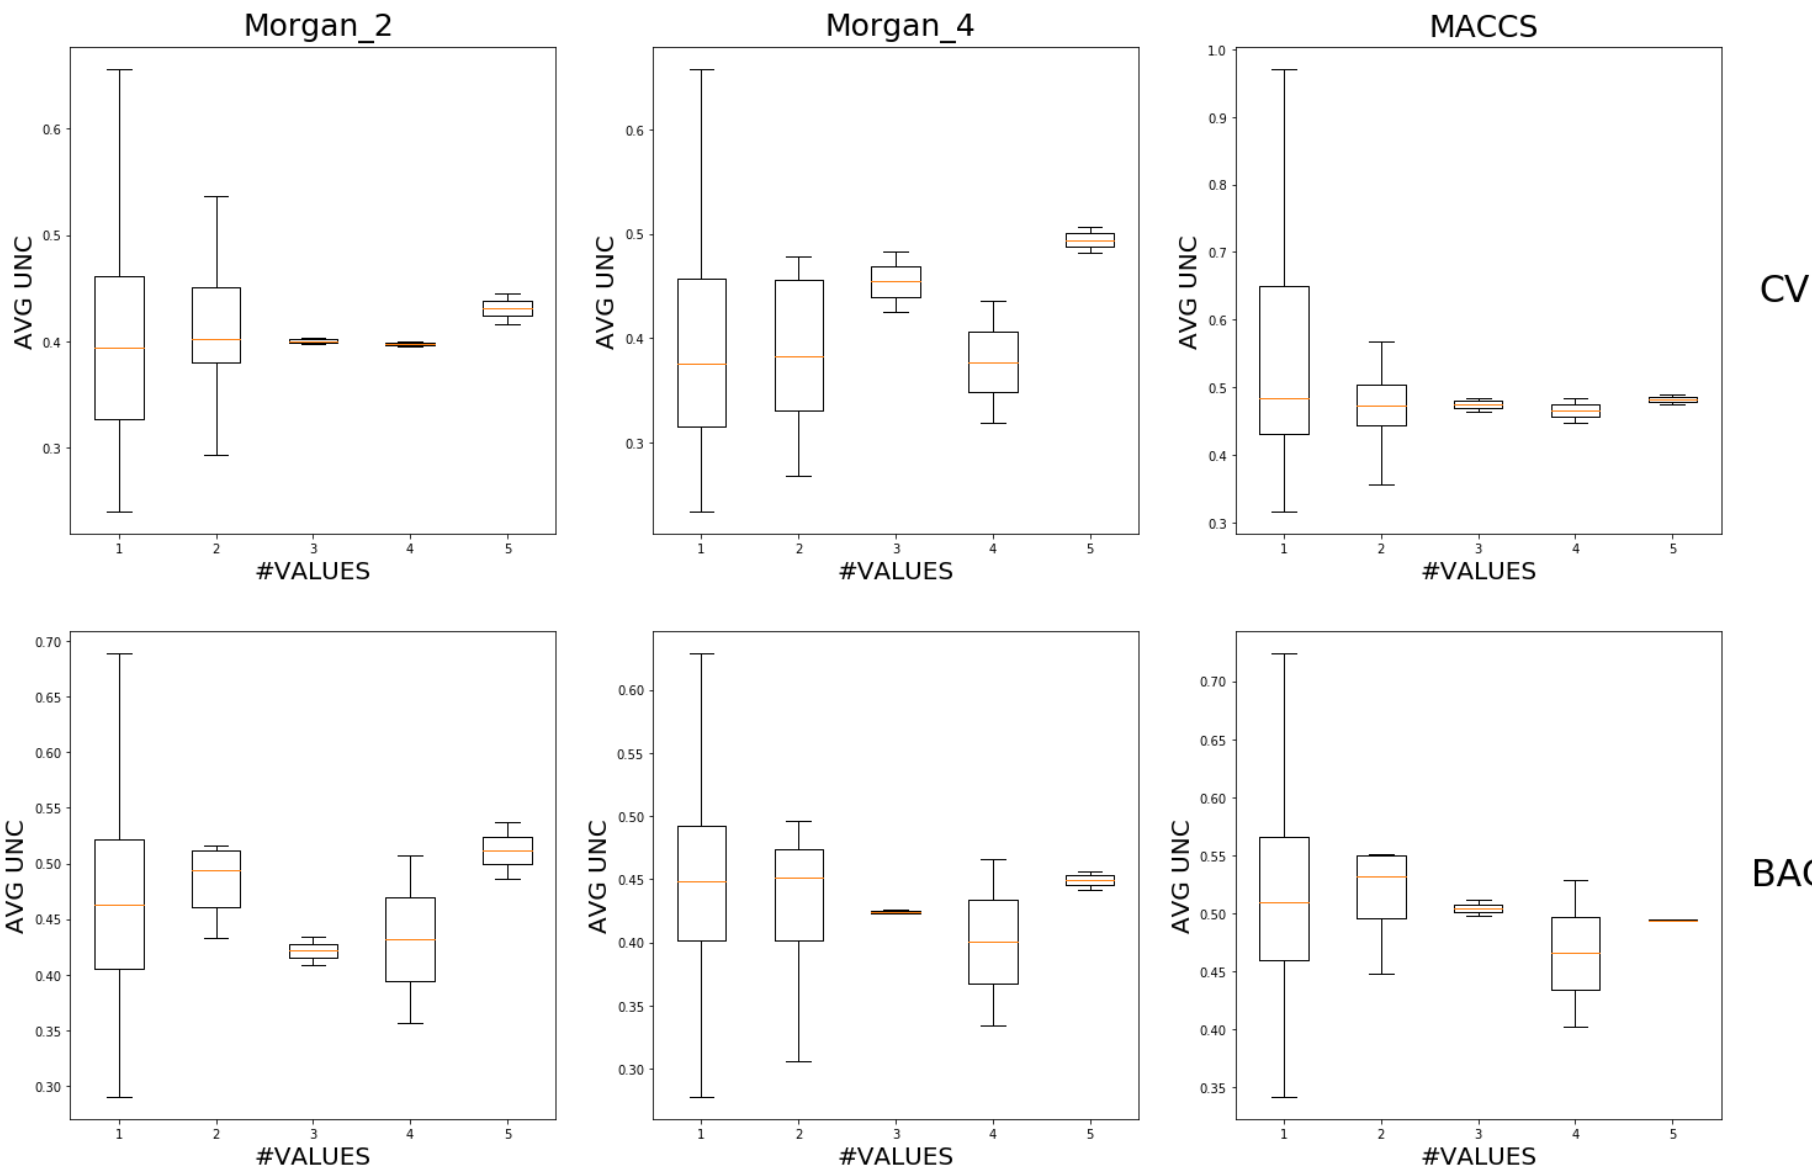

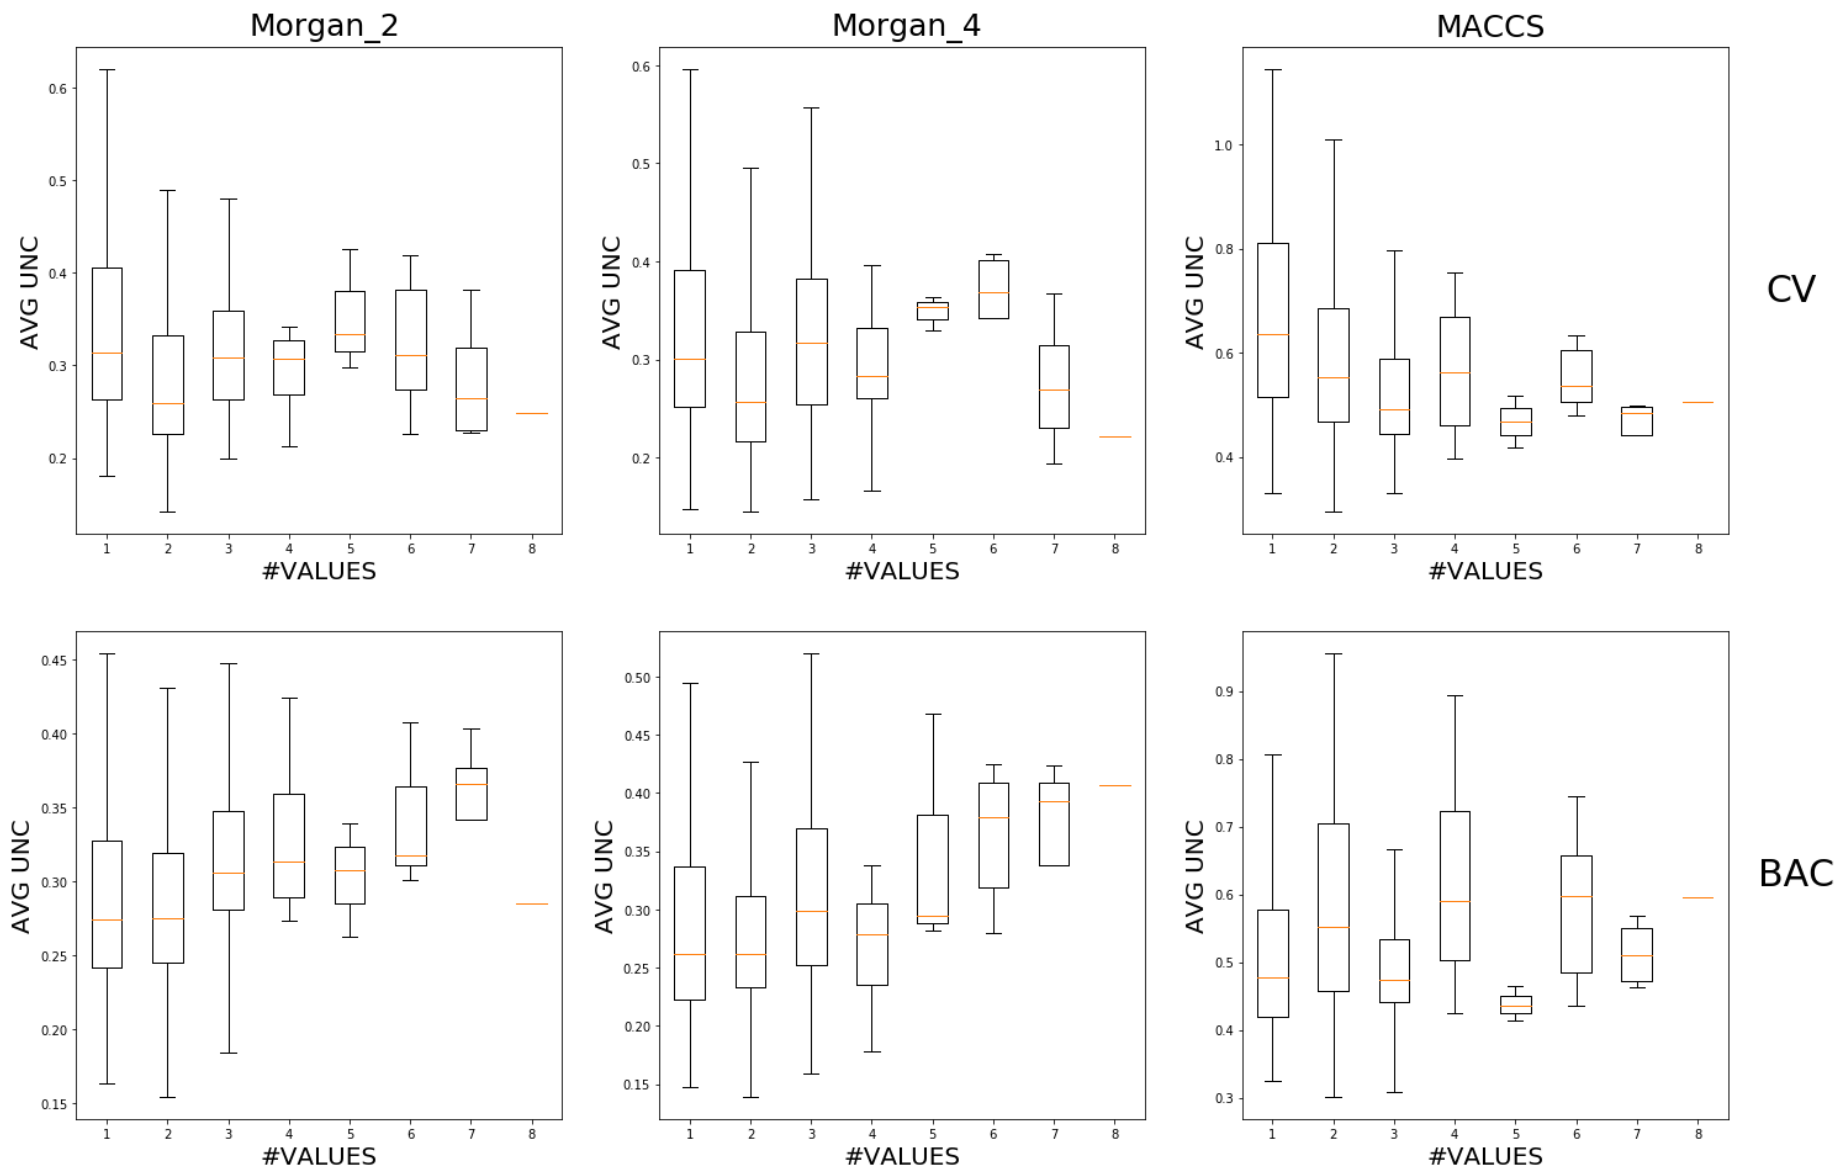



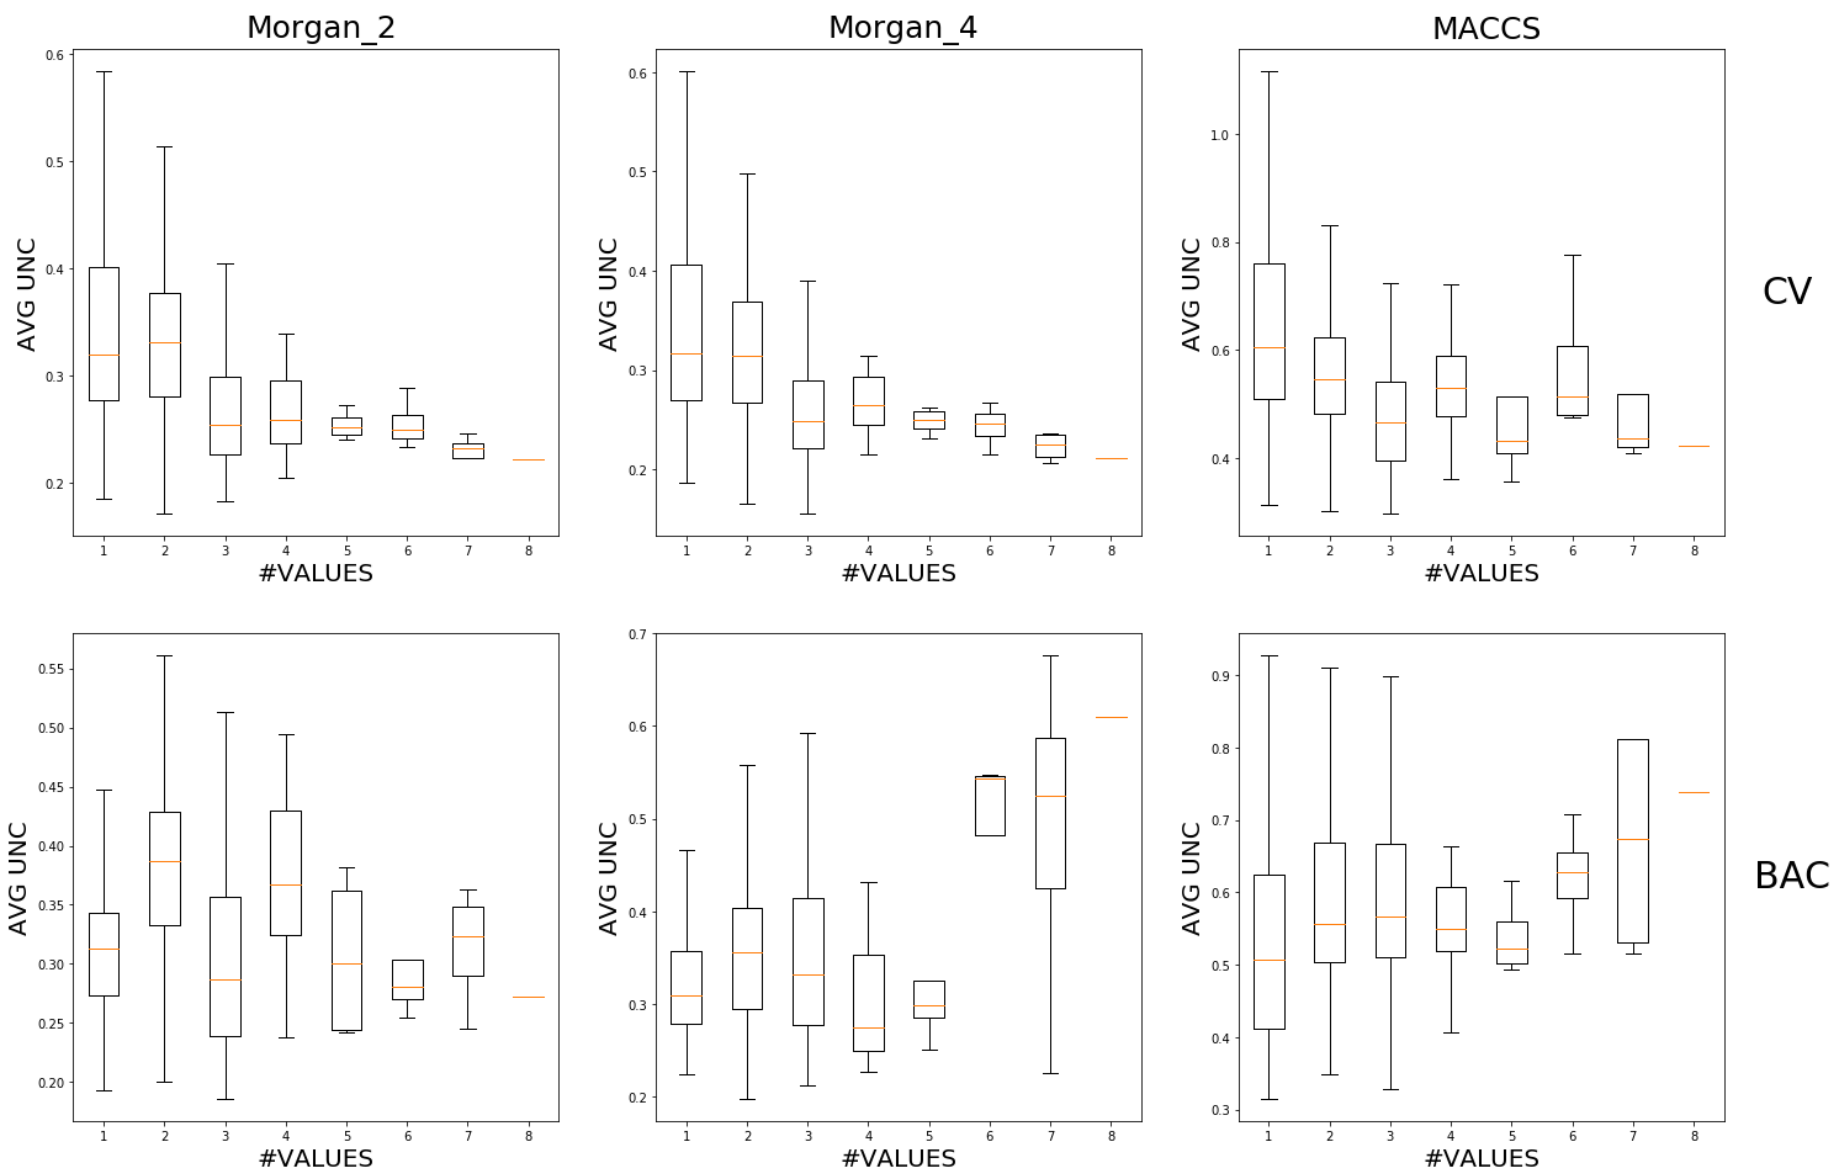

Supplement: s1 [file s1]

# CHEMBL214

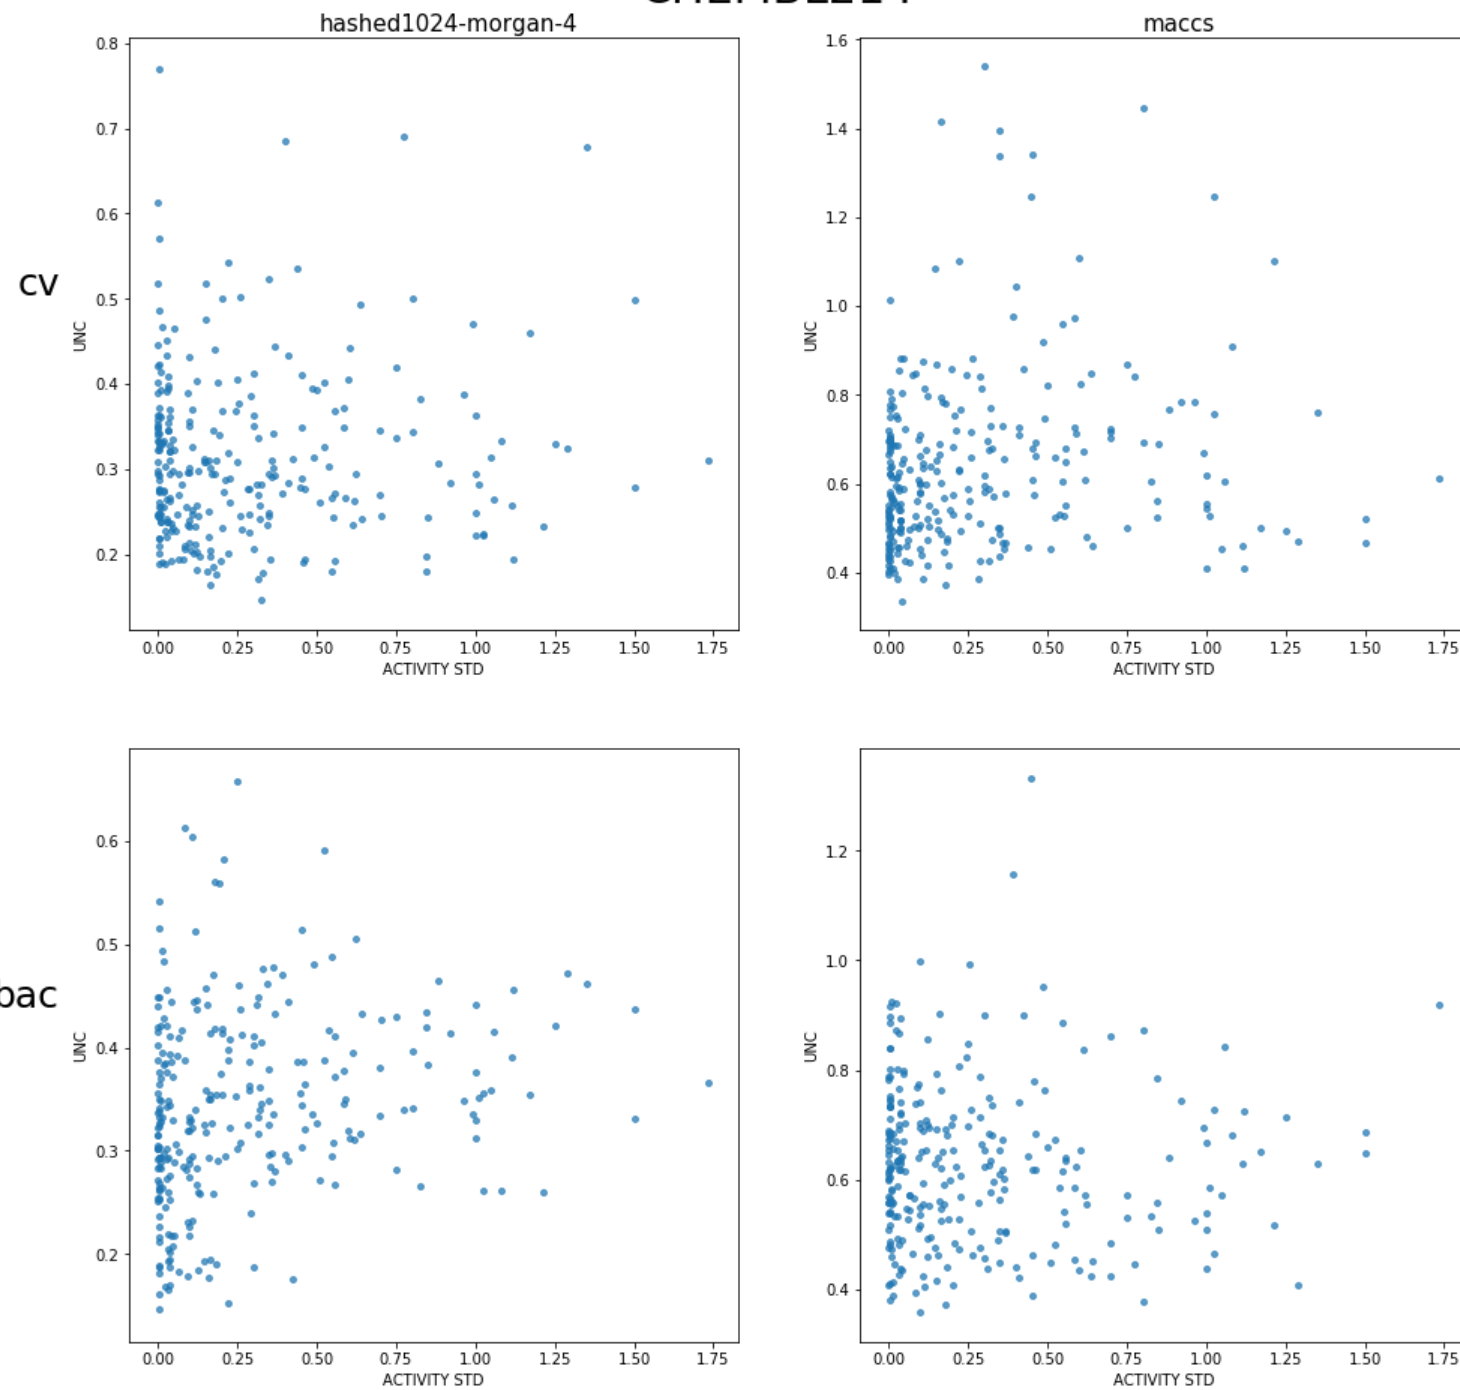



# CHEMBL216

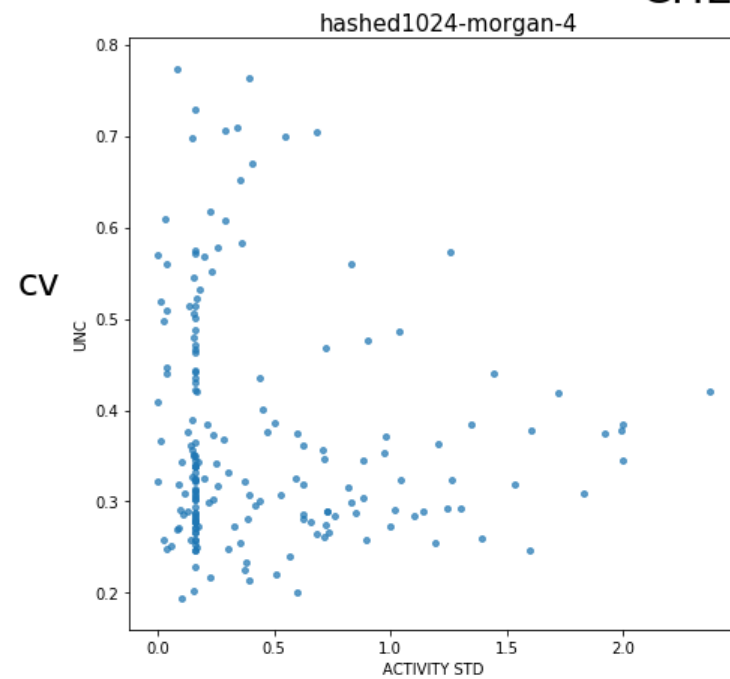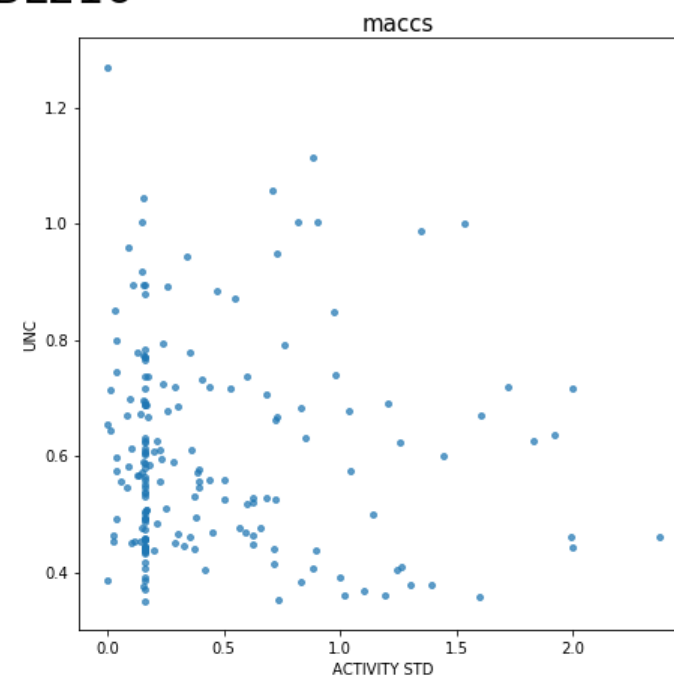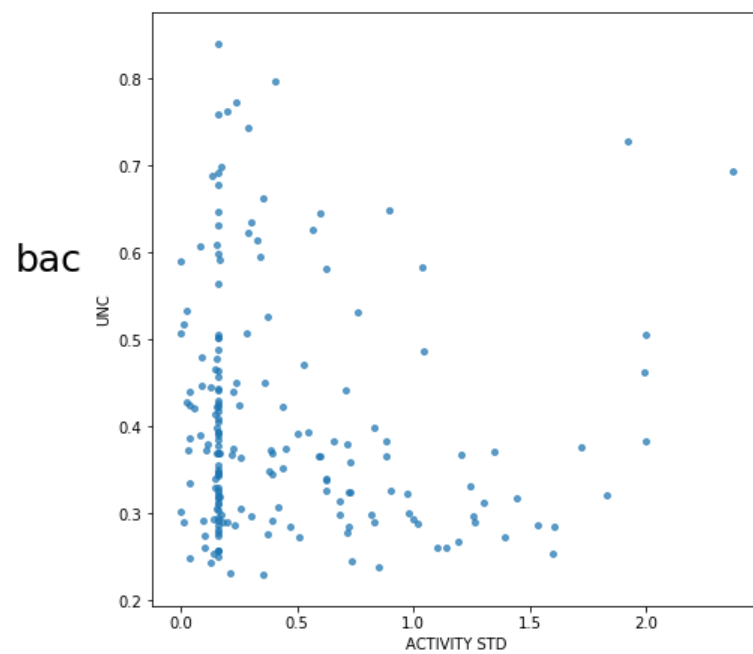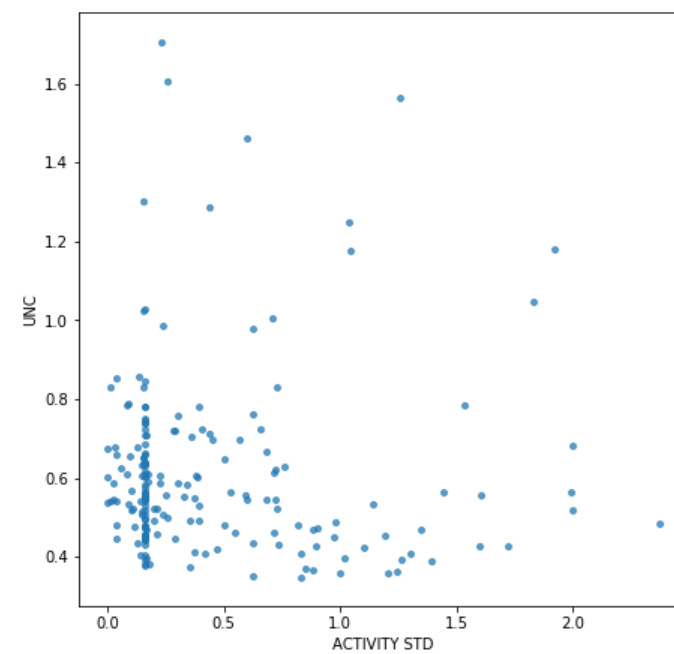



# CHEMBL217

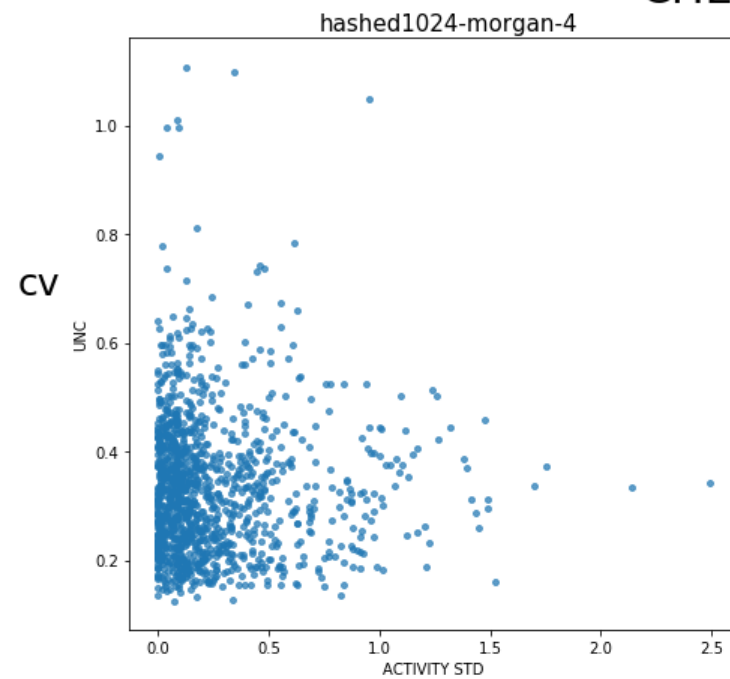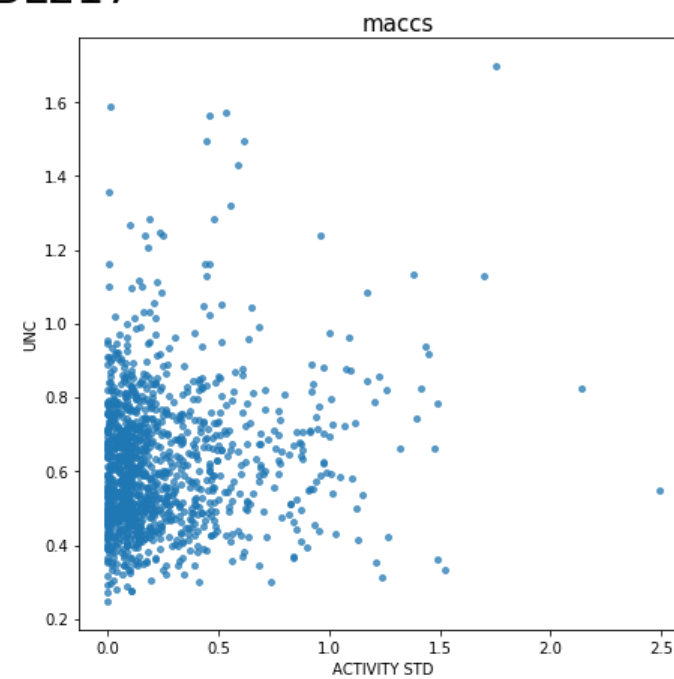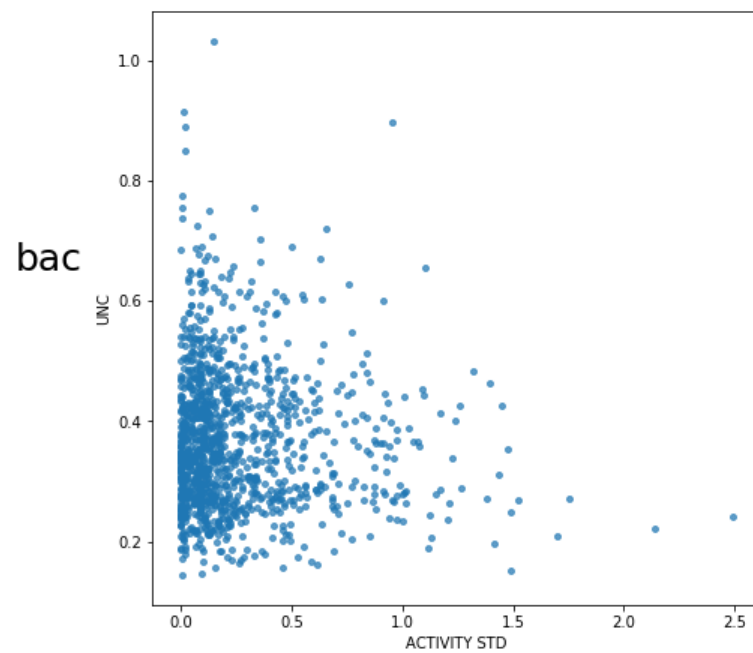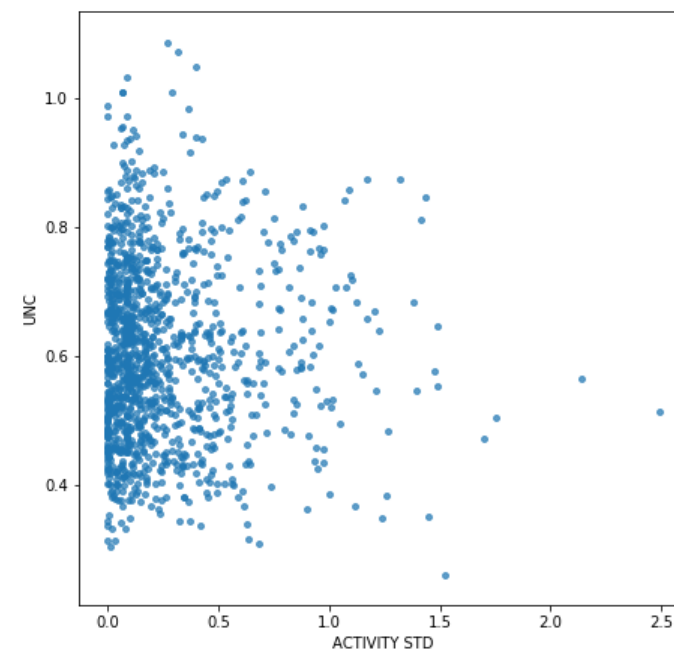



# CHEMBL224

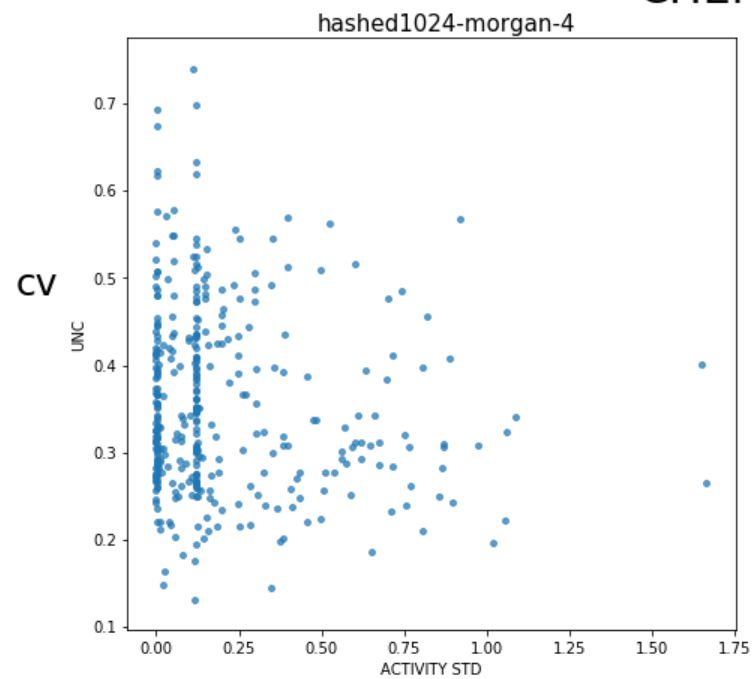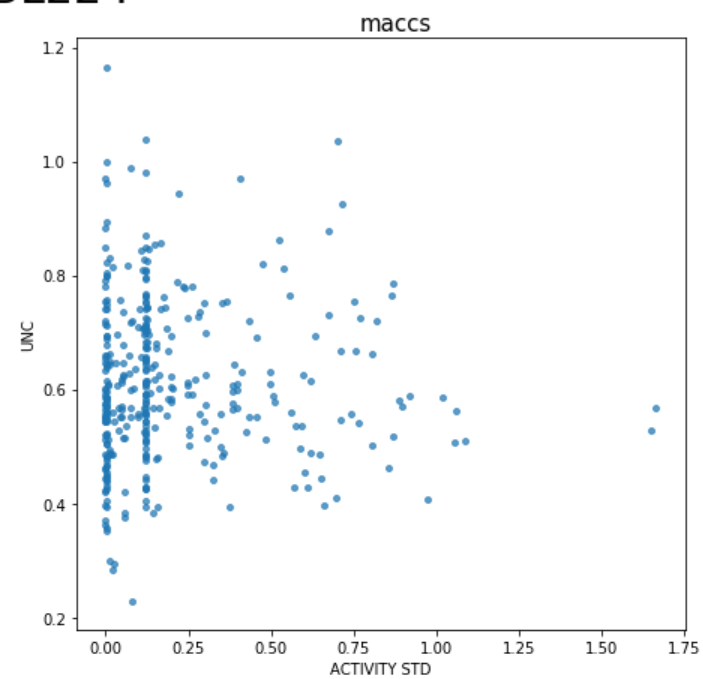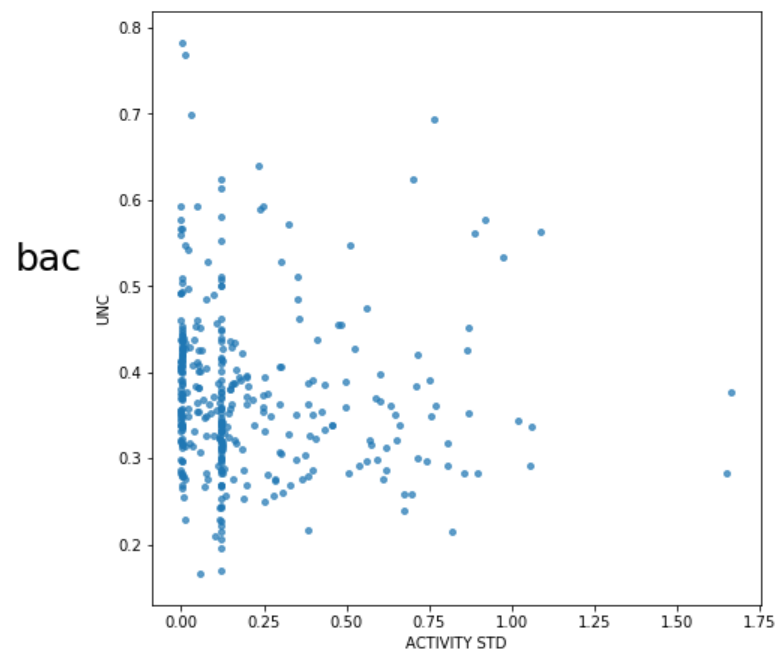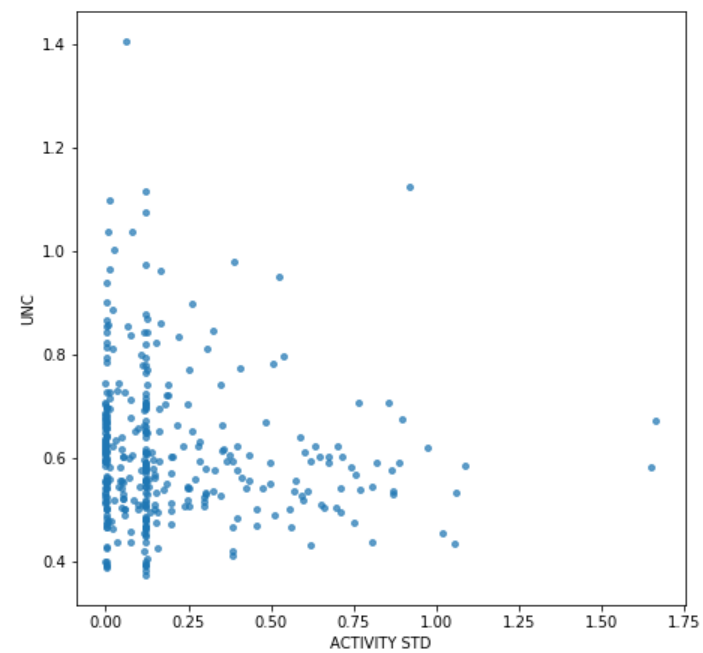



# CHEMBL225

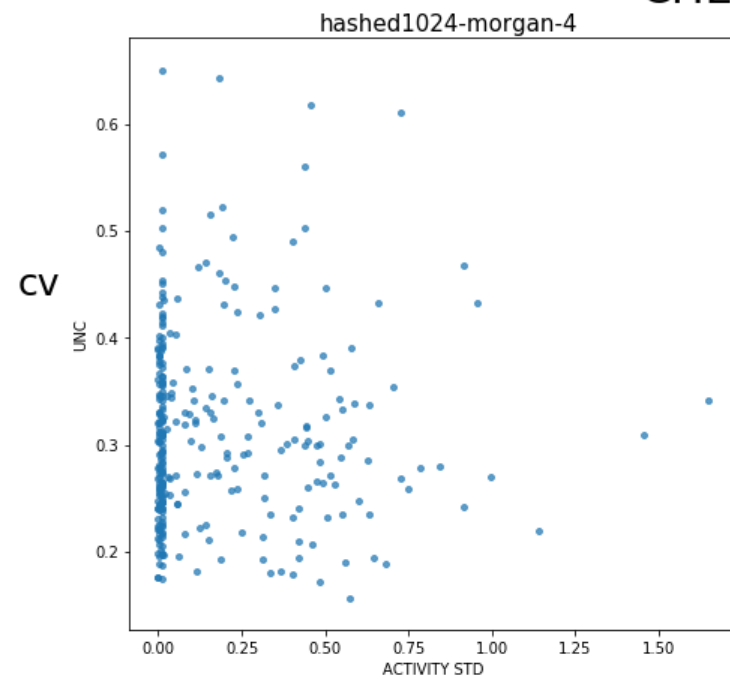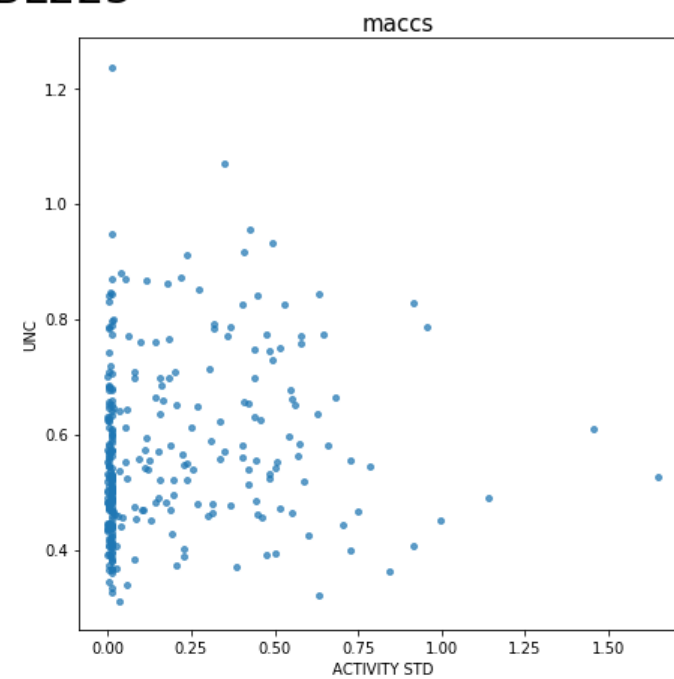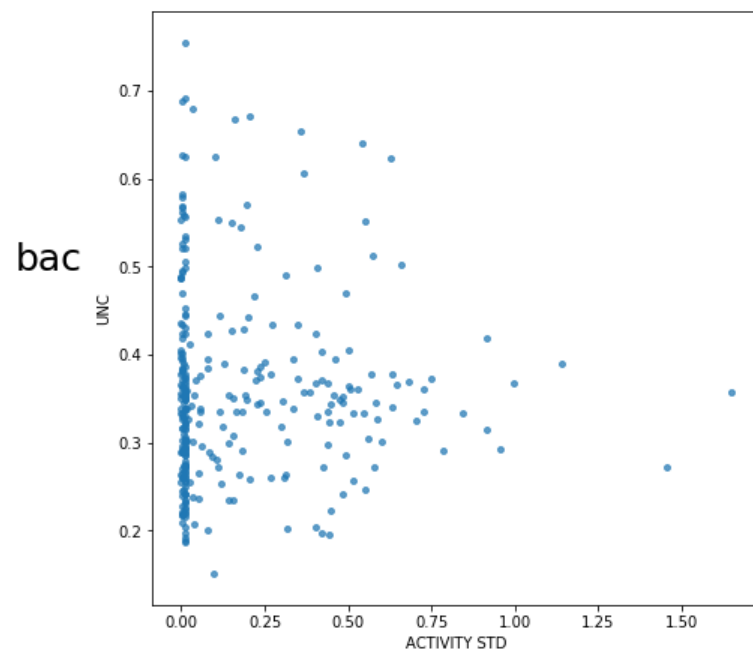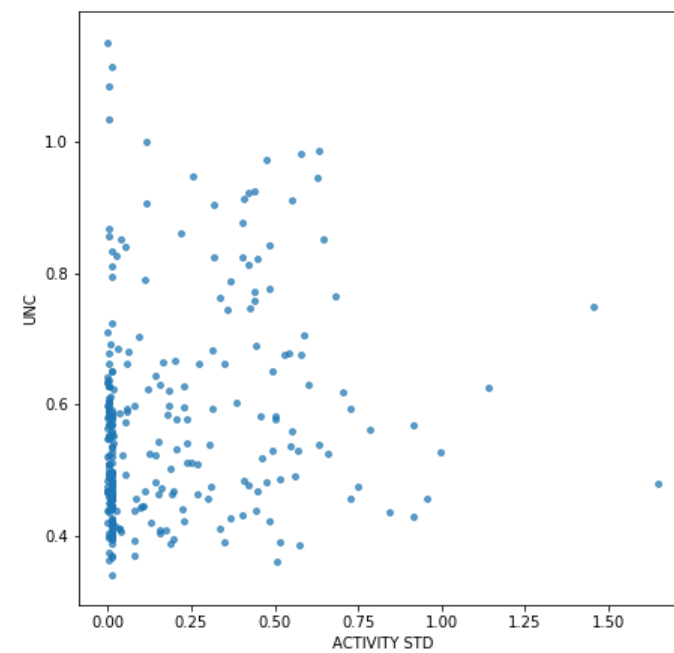



# CHEMBL226

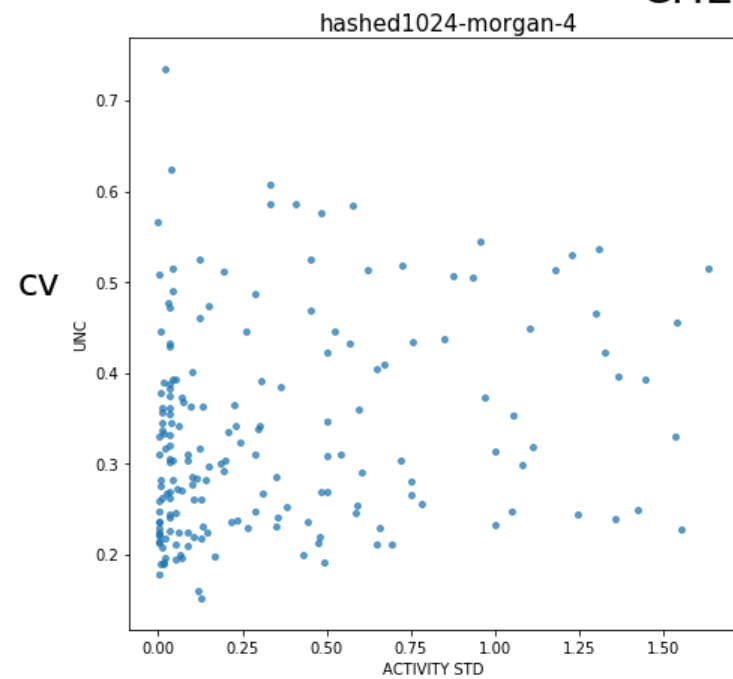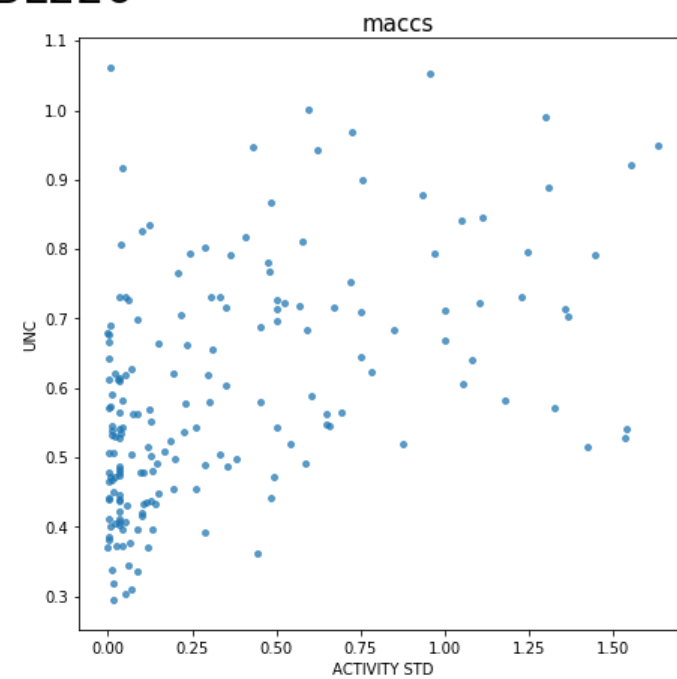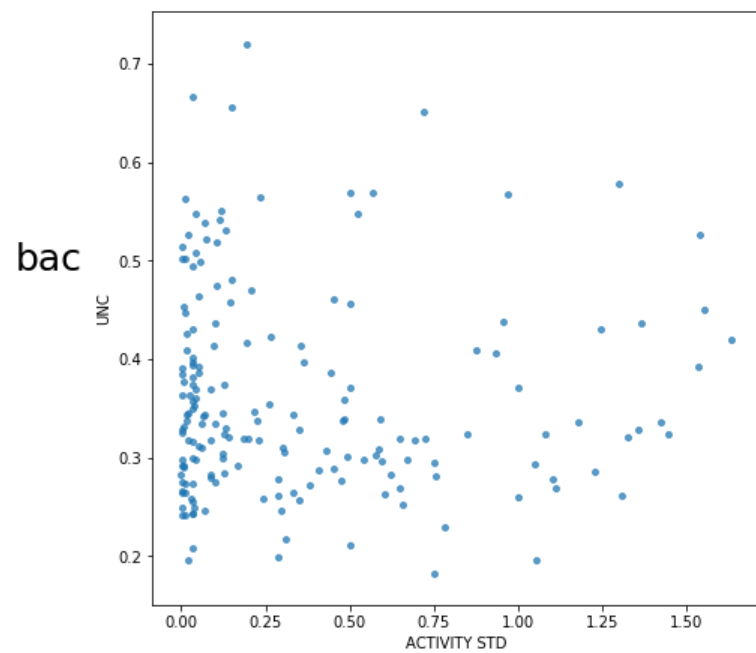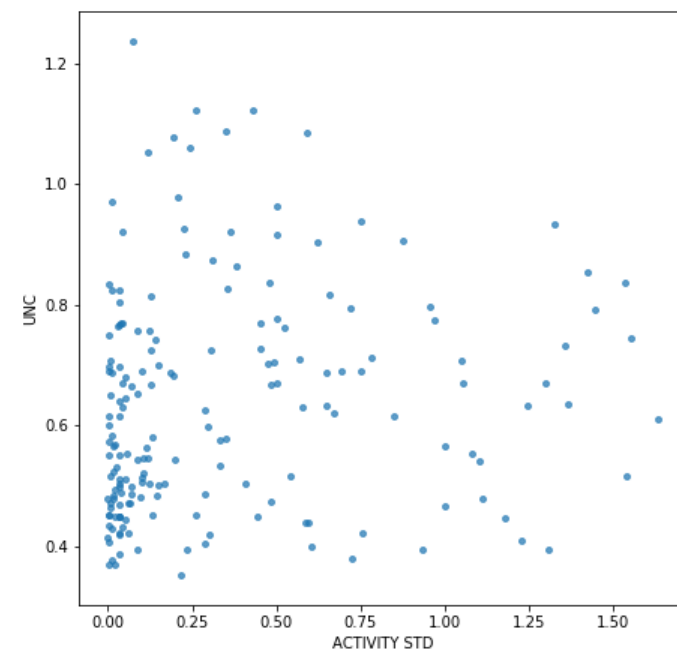



# CHEMBL251

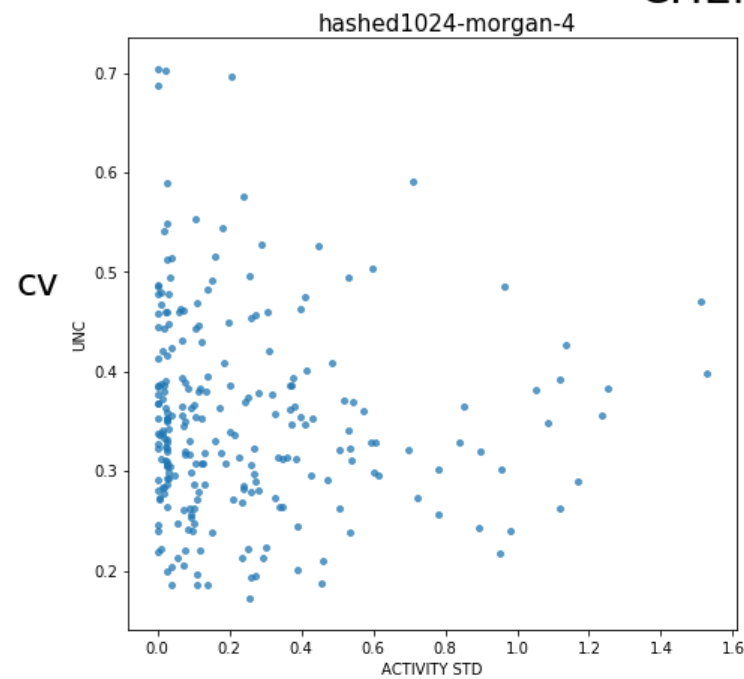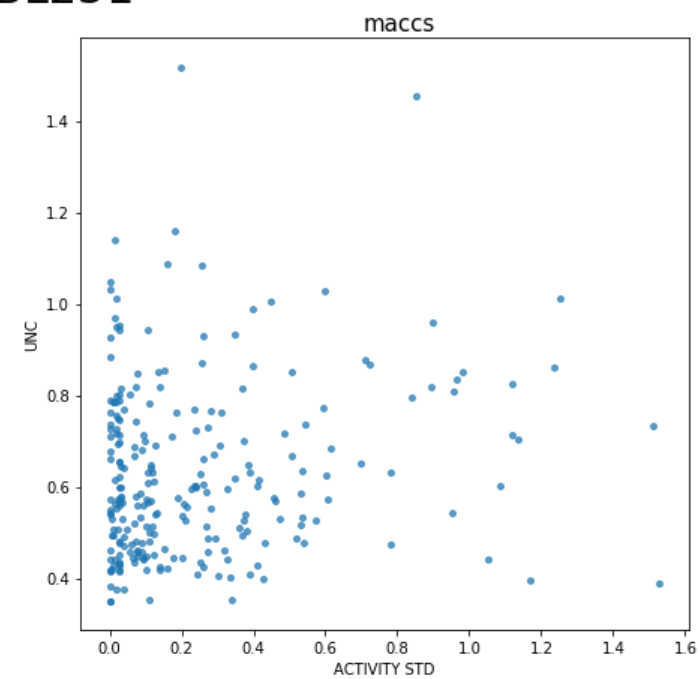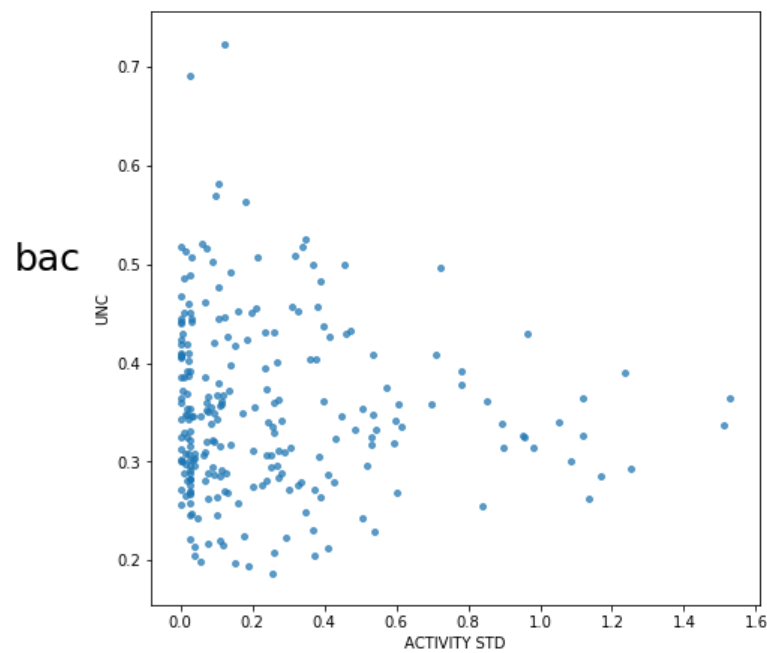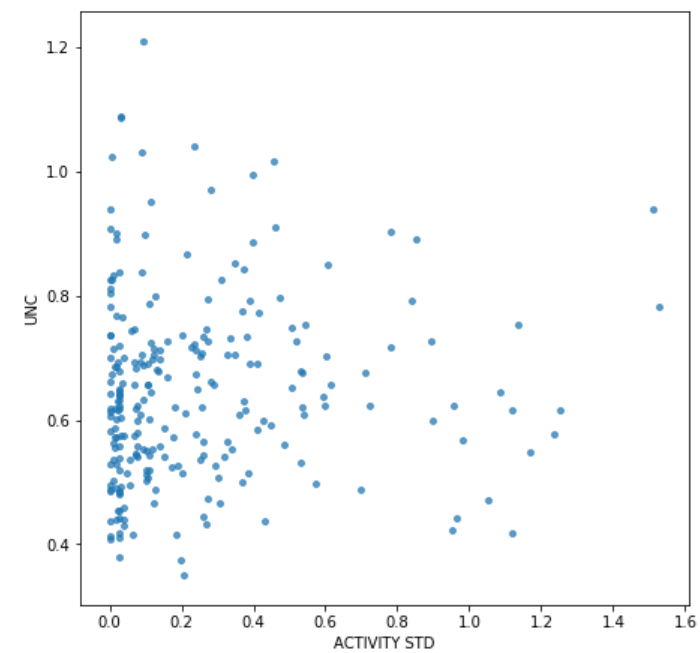



# CHEMBL264

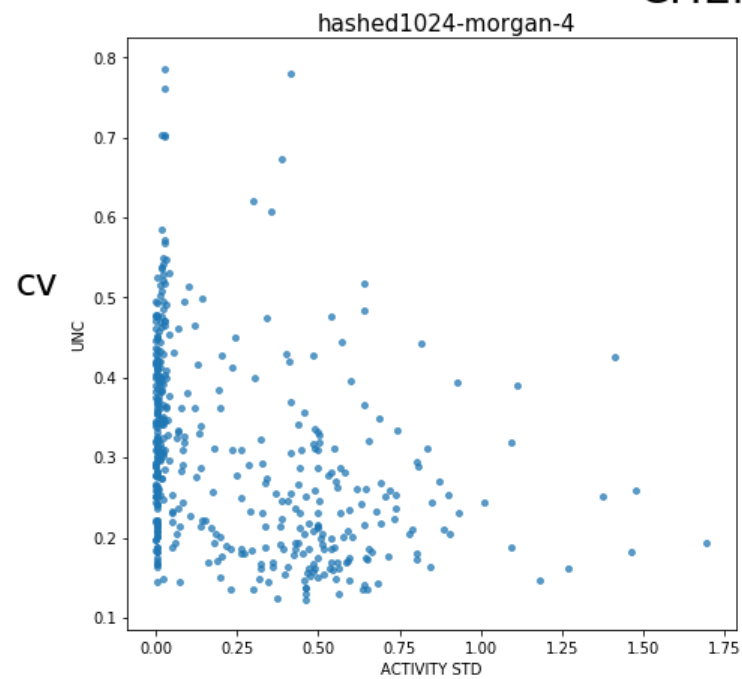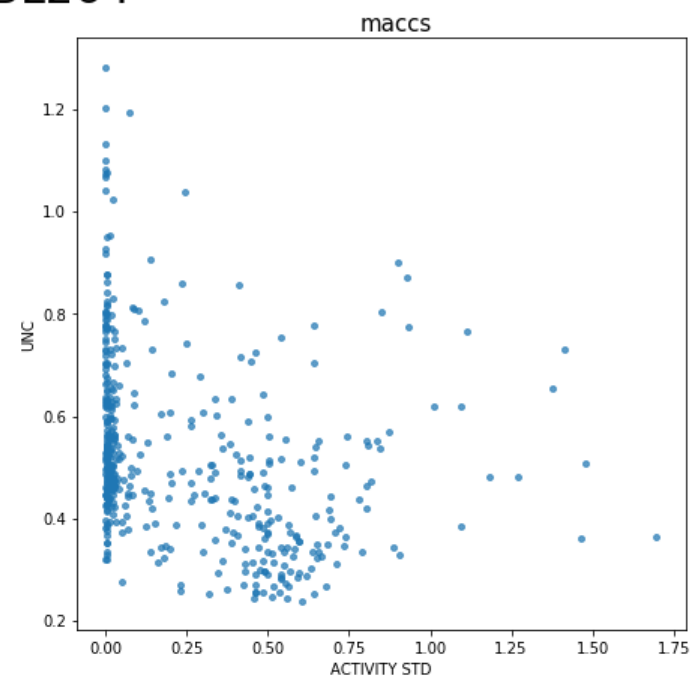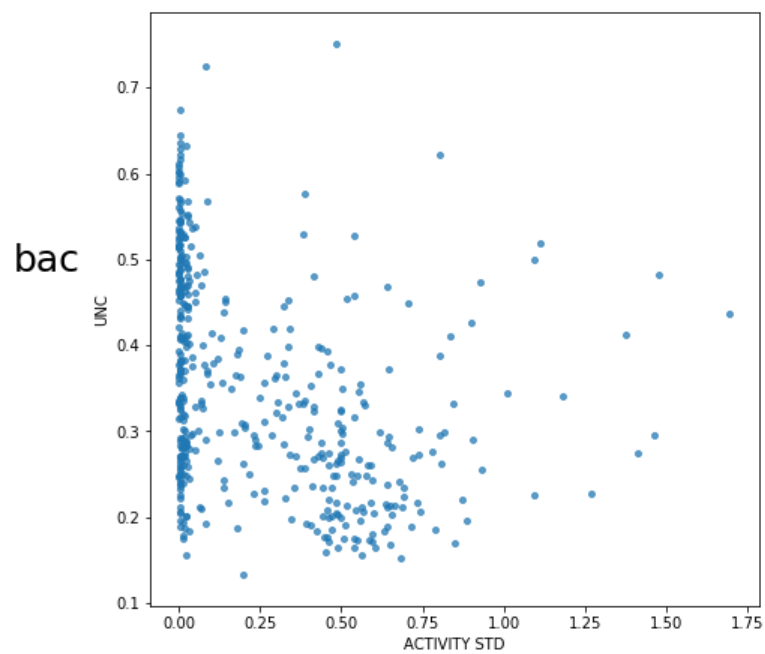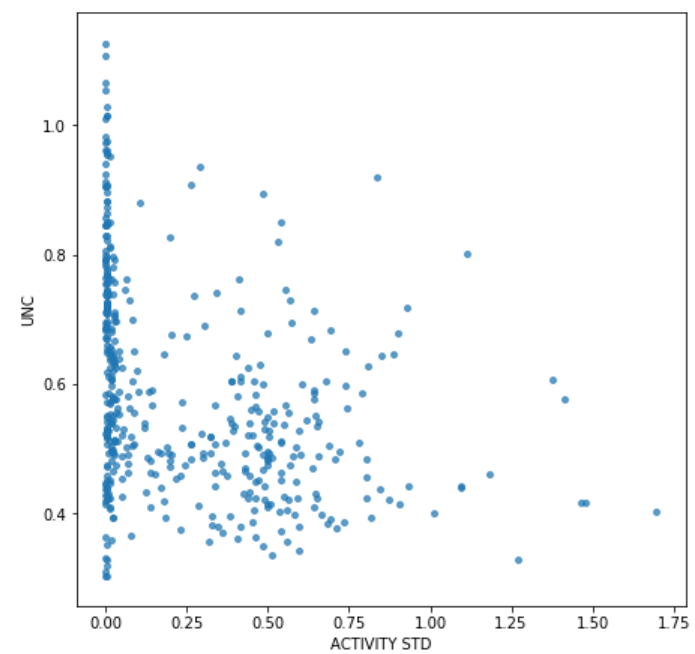



# CHEMBL3155

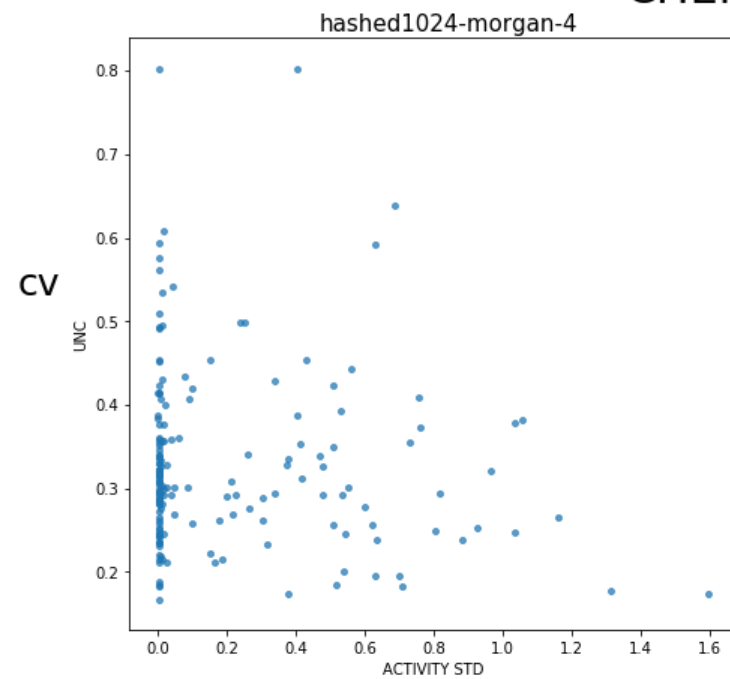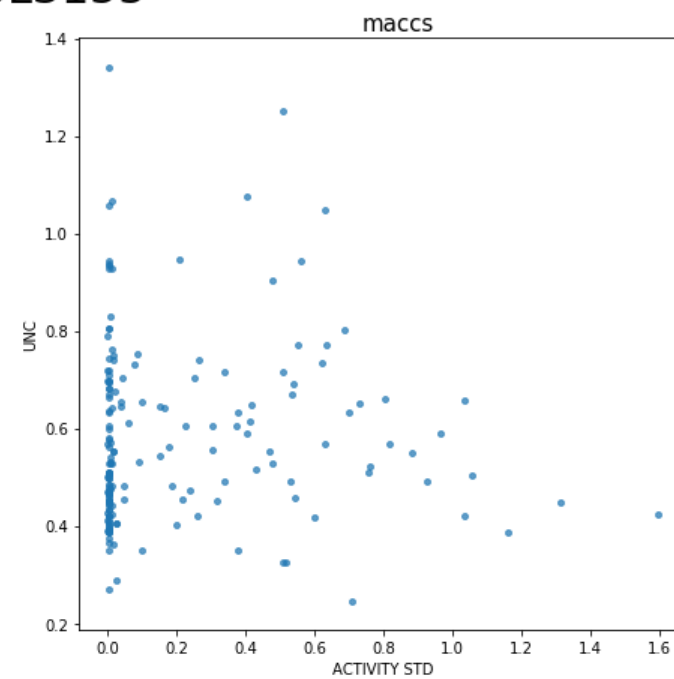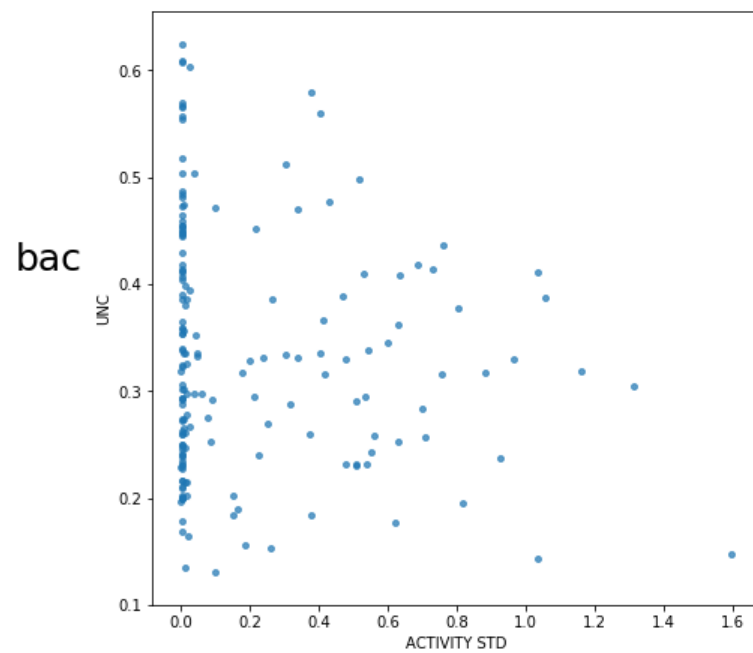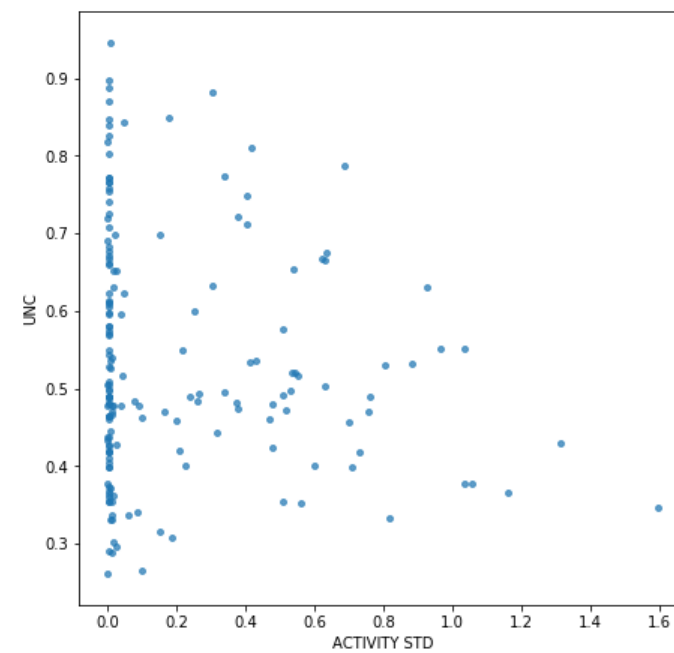



# CHEMBL3371

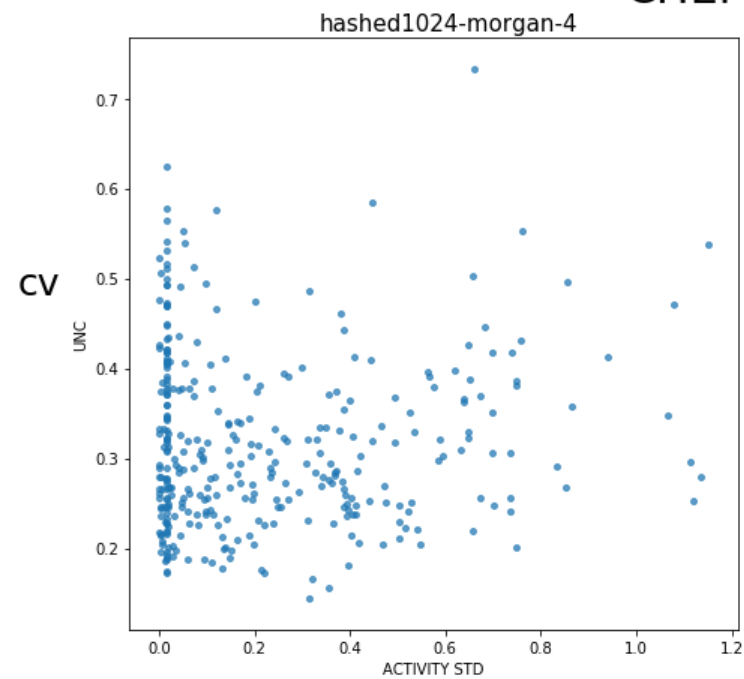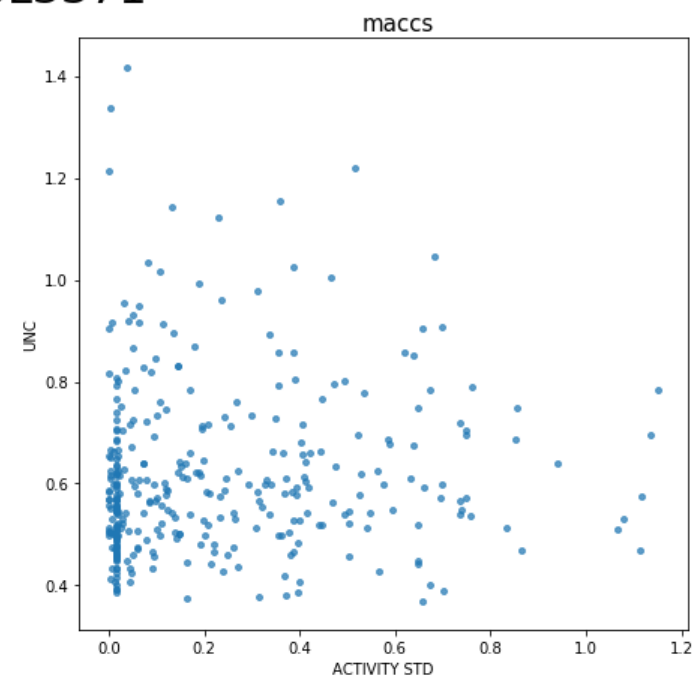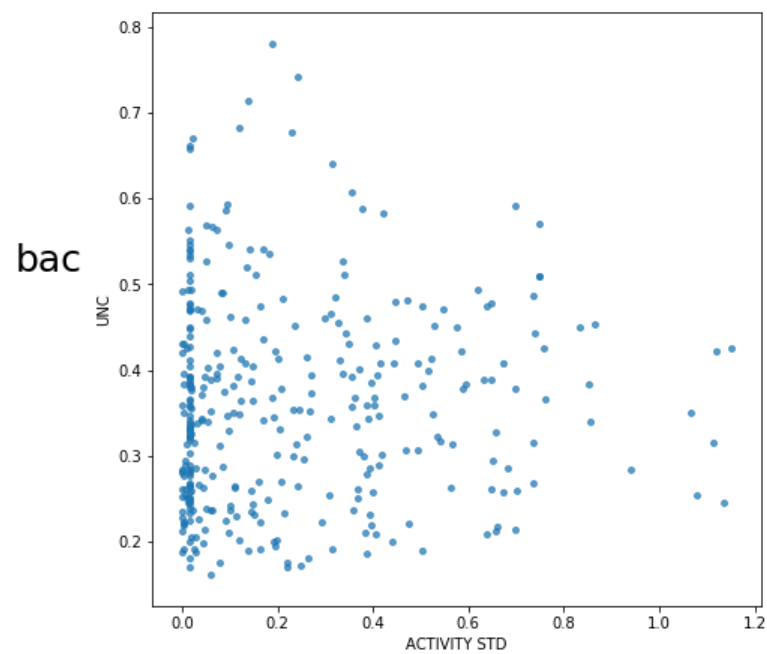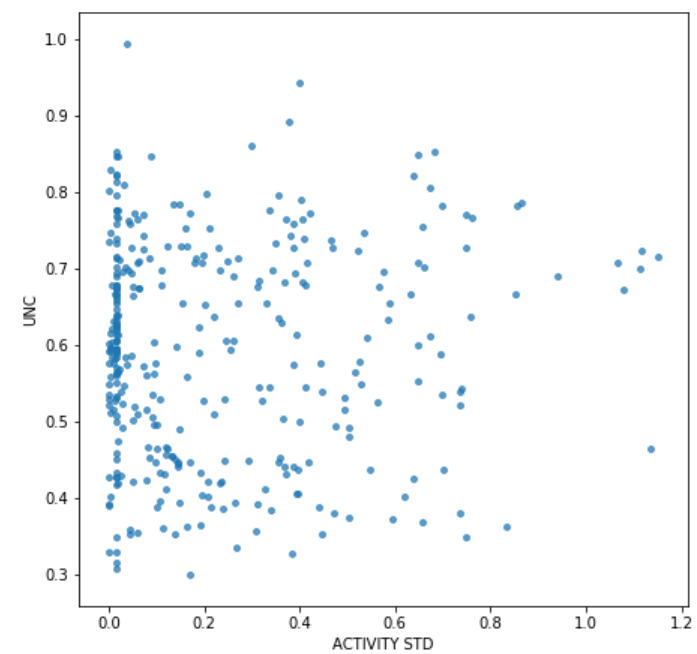

Supplement: s1 [file s1]
